# Supplementary material for: Amino-Acid-mTORC1-Driven DDA1 Phosphorylation Promotes DNA Repair and Glioblastoma Progression
Source: Research Square preprint supplement (doi:10.21203/rs.3.rs-7717041/v1), 2025-10-20
Supplement: Supplementary file 1 [file 03d3725d009b6924ba6c262c.xlsx]

## Sheet: FLAG-DDA1
Supplementary Table 1, related to Figure 1: Mass Spectrometry Analysis of FLAG- DDA1 containing Protein Complex in U118-MG cells
Protein	Protein Name	Gene Name	Peptides
Q9NYL9	Tropomodulin-3	TMOD3	2
Q9BQB6	Vitamin K epoxide reductase complex subunit 1	VKORC1	2
Q9BS18	Anaphase-promoting complex subunit 13	ANAPC13	1
Q01433	AMP deaminase 2	AMPD2	4
Q9NX14	NADH dehydrogenase [ubiquinone] 1 beta subcomplex subunit 11, mitochondrial	NDUFB11	3
P62861	Ubiquitin-like FUBI-ribosomal protein eS30 fusion protein	FAU	1
Q9Y5J9	Mitochondrial import inner membrane translocase subunit Tim8 B	TIMM8B	3
P17066	Heat shock 70 kDa protein 6	HSPA6	2
Q99460	26S proteasome non-ATPase regulatory subunit 1	PSMD1	31
Q86VM9	Zinc finger CCCH domain-containing protein 18	ZC3H18	1
Q5HYL3	Uncharacterized protein DKFZp686H16220	DKFZp686H16220	1
Q16576	Histone-binding protein RBBP7	RBBP7	6
Q9HC07	Putative divalent cation/proton antiporter TMEM165	TMEM165	1
Q15003	Condensin complex subunit 2	NCAPH	4
Q01844	RNA-binding protein EWS	EWSR1	2
Q9Y4Z0	U6 snRNA-associated Sm-like protein LSm4	LSM4	3
Q9BX68	Adenosine 5'-monophosphoramidase HINT2	HINT2	2
Q86V88	Magnesium-dependent phosphatase 1	MDP1	1
Q96T17	MAP7 domain-containing protein 2	MAP7D2	1
P82970	High mobility group nucleosome-binding domain-containing protein 5	HMGN5	6
P27348	14-3-3 protein theta	YWHAQ	20
Q9HAV7	GrpE protein homolog 1, mitochondrial	GRPEL1	9
Q16891	MICOS complex subunit MIC60	IMMT	21
Q9BQE3	Tubulin alpha-1C chain	TUBA1C	36
Q13200	26S proteasome non-ATPase regulatory subunit 2	PSMD2	30
P57088	Transmembrane protein 33	TMEM33	9
Q5VYK3	Proteasome adapter and scaffold protein ECM29	ECPAS	1
P63241	Eukaryotic translation initiation factor 5A-1	EIF5A	13
Q9Y5X3	Sorting nexin-5	SNX5	3
P39019	Small ribosomal subunit protein eS19	RPS19	12
P68036	Ubiquitin-conjugating enzyme E2 L3	UBE2L3	7
P67809	Y-box-binding protein 1	YBX1	15
Q99497	Parkinson disease protein 7	PARK7	11
Q53H12	Acylglycerol kinase, mitochondrial	AGK	6
P26358	DNA (cytosine-5)-methyltransferase 1	DNMT1	2
Q07065	Cytoskeleton-associated protein 4	CKAP4	22
O15305	Phosphomannomutase 2	PMM2	3
P84103	Serine/arginine-rich splicing factor 3	SRSF3	5
Q8NBS9	Thioredoxin domain-containing protein 5	TXNDC5	15
Q9Y657	Spindlin-1	SPIN1	17
P08195	Amino acid transporter heavy chain SLC3A2	SLC3A2	17
Q9UI30	Multifunctional methyltransferase subunit TRM112-like protein	TRMT112	2
P98179	RNA-binding protein 3	RBM3	2
O95793	Double-stranded RNA-binding protein Staufen homolog 1	STAU1	4
Q92945	Far upstream element-binding protein 2	KHSRP	21
P0DP23	Calmodulin-1	CALM1	12
O75165	DnaJ homolog subfamily C member 13	DNAJC13	12
P11441	Ubiquitin-like protein 4A	UBL4A	7
O43240	Kallikrein-10	KLK10	1
P50502	Hsc70-interacting protein	ST13	9
Q14019	Coactosin-like protein	COTL1	5
Q96PU8	KH domain-containing RNA-binding protein QKI	QKI	3
Q02809	Procollagen-lysine,2-oxoglutarate 5-dioxygenase 1	PLOD1	1
Q93045	Stathmin-2	STMN2	1
Q16851	UTP--glucose-1-phosphate uridylyltransferase	UGP2	4
P09493	Tropomyosin alpha-1 chain	TPM1	3
P27797	Calreticulin	CALR	15
P46783	Small ribosomal subunit protein eS10	RPS10	7
Q9UK45	U6 snRNA-associated Sm-like protein LSm7	LSM7	2
P41227	N-alpha-acetyltransferase 10	NAA10	5
P31937	3-hydroxyisobutyrate dehydrogenase, mitochondrial	HIBADH	2
Q9Y5M8	Signal recognition particle receptor subunit beta	SRPRB	11
Q9BRA2	Thioredoxin domain-containing protein 17	TXNDC17	6
Q9H3N1	Thioredoxin-related transmembrane protein 1	TMX1	5
Q9H2U9	Disintegrin and metalloproteinase domain-containing protein 7	ADAM7	1
P82932	Tropomodulin-4	MRPS6	3
Q16531	DNA damage-binding protein 1	DDB1	109
Q8N122	Regulatory-associated protein of mTOR	RPTOR	11
A0A087WXX8	Succinate dehydrogenase [ubiquinone] iron-sulfur subunit, mitochondrial (Fragment)	SDHB	1
A0A0A0MT31	Proline-rich protein 4	PRR4	1
A0A0A0PP50	Cytochrome b (Fragment)	CYTB	1
A0A0A7C8J0	MHC class I antigen (Fragment)	HLA-C	1
A0A1S5UZH5	Mitochondrial thioredoxin	TXN	2
A0A384MDW7	Enoyl Coenzyme A hydratase, short chain, 1, mitochondrial	ECHS1	1
A0A5C2FWQ5	IGL c1528_light_IGKV3-15_IGKJ1 (Fragment)		1
A0A5C2GRU1	IG c224_light_IGKV4-1_IGKJ1 (Fragment)		1
A0A7I2V4V1	Peptidyl-prolyl cis-trans isomerase	PPIA	1
A1L0T0	2-hydroxyacyl-CoA lyase 2	ILVBL	1
A1L390	Pleckstrin homology domain-containing family G member 3	PLEKHG3	1
A4FU69	EF-hand calcium-binding domain-containing protein 5	EFCAB5	1
A6NDG6	Glycerol-3-phosphate phosphatase	PGP	1
A6NHL2	Tubulin alpha chain-like 3	TUBAL3	1
A6NIH7	Protein unc-119 homolog B	UNC119B	2
A8K3Q9	Large ribosomal subunit protein eL14		1
A8MWD9	Putative small nuclear ribonucleoprotein G-like protein 15	SNRPG	1
A9QM74	Importin subunit alpha-8	KPNA7	1
B2KLH3	Cytochrome b	CYTB	1
B3KRI9	cDNA FLJ34383 fis, clone HCHON1000015, highly similar to Four and a half LIM domains protein 1		1
B3KWD0	cDNA FLJ42779 fis, clone BRAWH3005300, highly similar to Exportin-1		1
B4DSA7	cDNA FLJ60847, highly similar to Homo sapiens denticleless homolog (DTL), mRNA		1
B4DY08	Heterogeneous nuclear ribonucleoprotein C	HNRNPC	1
C9J0J7	Profilin	PFN2	2
D3DPU2	Adenylyl cyclase-associated protein	CAP1	1
E9PN89	Heat shock protein family A (Hsp70) member 8 (Fragment)	HSPA8	2
E9PP50	Cofilin 1 (Fragment)	CFL1	1
F2Z3K6	Cytochrome P450 family 20 subfamily A member 1	CYP20A1	1
F8VRH0	Poly(rC) binding protein 2 (Fragment)	PCBP2	1
G3V1N2	Alpha-globin	HBA1	1
H0Y2W2	ATPase family AAA domain containing 3A (Fragment)	ATAD3A	1
H0YG12	TUB like protein 3 (Fragment)	TULP3	1
H0YJN4	RNA binding motif protein 23 (Fragment)	RBM23	1
H7C2J9	Proteasome 26S subunit ubiquitin receptor, non-ATPase 4 (Fragment)	PSMD4	1
J3QSC8	Potassium channel tetramerization domain containing 2	KCTD2	1
L0R512	Alternative protein NCAM2	NCAM2	1
O00115	Deoxyribonuclease-2-alpha	DNASE2	1
O00116	Alkyldihydroxyacetonephosphate synthase, peroxisomal	AGPS	3
O00170	AH receptor-interacting protein	AIP	2
O00255	Menin	MEN1	1
O00291	Huntingtin-interacting protein 1	HIP1	1
O00459	Phosphatidylinositol 3-kinase regulatory subunit beta	PIK3R1	1
O00461	Golgi integral membrane protein 4	GOLIM4	2
O00499	Myc box-dependent-interacting protein 1	BIN1	1
O00584	Ribonuclease T2	RNASET2	2
O00629	Importin subunit alpha-3	KPNA4	3
O14514	Adhesion G protein-coupled receptor B1	ADGRB1	1
O14521	Succinate dehydrogenase [ubiquinone] cytochrome b small subunit, mitochondrial	SDHD	1
O14617	AP-3 complex subunit delta-1	AP3D1	1
O14802	DNA-directed RNA polymerase III subunit RPC1	POLR3A	1
O14908	PDZ domain-containing protein GIPC1	GIPC1	2
O14964	Hepatocyte growth factor-regulated tyrosine kinase substrate	HGS	1
O14967	Calmegin	CLGN	1
O14981	TATA-binding protein-associated factor 172	BTAF1	1
O15050	TPR and ankyrin repeat-containing protein 1	TRANK1	1
O15116	U6 snRNA-associated Sm-like protein LSm1	LSM1	1
O15318	DNA-directed RNA polymerase III subunit RPC7	POLR3G	1
O15382	Branched-chain-amino-acid aminotransferase, mitochondrial	BCAT2	2
O15479	Melanoma-associated antigen B2	MAGEB2	3
O15511	Actin-related protein 2/3 complex subunit 5	ARPC5	1
O43181	NADH dehydrogenase [ubiquinone] iron-sulfur protein 4, mitochondrial	NDUFS4	3
O43237	Cytoplasmic dynein 1 light intermediate chain 2	DYNC1LI2	1
O43251	RNA binding protein fox-1 homolog 2	RBFOX1	1
O43464	Serine protease HTRA2, mitochondrial	HTRA2	3
O43502	DNA repair protein RAD51 homolog 3	RAD51C	1
O43504	Ragulator complex protein LAMTOR5	LAMTOR5	3
O43542	DNA repair protein XRCC3	XRCC3	1
O43681	ATPase GET3	GET3	4
O43709	Probable 18S rRNA (guanine-N(7))-methyltransferase	BUD23	1
O43795	Unconventional myosin-Ib	MYO1B	1
O43819	Protein SCO2 homolog, mitochondrial	SCO2	4
O43826	Glucose-6-phosphate exchanger SLC37A4	SLC37A4	1
O43896	Kinesin-like protein KIF1C	KIF1A	1
O43924	Retinal rod rhodopsin-sensitive cGMP 3',5'-cyclic phosphodiesterase subunit delta	PDE6D	1
O43929	Origin recognition complex subunit 4	ORC4	1
O60216	Double-strand-break repair protein rad21 homolog	RAD21	2
O60306	RNA helicase aquarius	AQR	1
O60343	TBC1 domain family member 4	TBC1D4	2
O60493	Sorting nexin-3	SNX3	2
O60524	Ribosome quality control complex subunit NEMF	NEMF	1
O60645	Exocyst complex component 3	EXOC3	1
O60664	Perilipin-3	PLIN3	5
O60684	Importin subunit alpha-7	KPNA6	1
O60739	Eukaryotic translation initiation factor 1b	EIF1	2
O60783	Small ribosomal subunit protein uS14m	MRPS14	2
O60828	Polyglutamine-binding protein 1	PQBP1	3
O60831	PRA1 family protein 2	PRAF2	1
O75179	Ankyrin repeat domain-containing protein 17	ANKRD17	2
O75380	NADH dehydrogenase [ubiquinone] iron-sulfur protein 6, mitochondrial	NDUFS6	1
O75394	Large ribosomal subunit protein bL33m	MRPL33	2
O75419	Cell division control protein 45 homolog	CDC45	1
O75431	Metaxin-2	MTX2	2
O75438	NADH dehydrogenase [ubiquinone] 1 beta subcomplex subunit 1	NDUFB1	2
O75461	Transcription factor E2F6	E2F6	1
O75528	Transcriptional adapter 3	TADA3	1
O75581	Low-density lipoprotein receptor-related protein 6	LRP6	1
O75607	Nucleoplasmin-3	NPM3	2
O75717	WD repeat and HMG-box DNA-binding protein 1	WDHD1	1
O75718	Cartilage-associated protein	CRTAP	1
O75746	Electrogenic aspartate/glutamate antiporter SLC25A12, mitochondrial	SLC25A12	2
O75794	Cell division cycle protein 123 homolog	CDC123	3
O75817	Ribonuclease P protein subunit p20	POP7	1
O75940	Survival of motor neuron-related-splicing factor 30	SMNDC1	1
O76011	Keratin, type I cuticular Ha4	KRT34	2
O76071	Probable cytosolic iron-sulfur protein assembly protein CIAO1	CIAO1	1
O94762	ATP-dependent DNA helicase Q5	RECQL5	1
O94788	Retinal dehydrogenase 2	ALDH1A2	2
O94874	E3 UFM1-protein ligase 1	UFL1	2
O94915	Protein furry homolog-like	FRYL	1
O94927	HAUS augmin-like complex subunit 5	HAUS5	1
O95229	ZW10 interactor	ZWINT	1
O95239	Chromosome-associated kinesin KIF4A	KIF4A	1
O95302	Peptidyl-prolyl cis-trans isomerase FKBP9	FKBP9	1
O95376	E3 ubiquitin-protein ligase ARIH2	ARIH2	1
O95394	Phosphoacetylglucosamine mutase	PGM3	1
O95429	BAG family molecular chaperone regulator 4	BAG4	3
O95470	Sphingosine-1-phosphate lyase 1	SGPL1	1
O95563	Mitochondrial pyruvate carrier 2	MPC2	1
O95619	YEATS domain-containing protein 4	YEATS4	1
O95816	BAG family molecular chaperone regulator 2	BAG2	9
O95817	BAG family molecular chaperone regulator 3	BAG3	7
O95825	Quinone oxidoreductase-like protein 1	CRYZL1	1
O96005	Putative lipid scramblase CLPTM1	CLPTM1	3
O96033	Molybdopterin synthase sulfur carrier subunit	MOCS2	1
P00167	Cytochrome b5	CYB5A	3
P00738	Haptoglobin	HP	3
P01008	Antithrombin-III	SERPINC1	2
P01009	Alpha-1-antitrypsin	SERPINA1	1
P01011	Alpha-1-antichymotrypsin	SERPINA3	1
P01036	Cystatin-S	CST1	2
P02647	Apolipoprotein A-I	APOA1	6
P02763	Alpha-1-acid glycoprotein 1	ORM1	1
P02771	Alpha-fetoprotein	AFP	2
P03905	NADH-ubiquinone oxidoreductase chain 4	MT-ND4	1
P04083	Annexin A1	ANXA1	2
P04899	Guanine nucleotide-binding protein G(i) subunit alpha-2	GNAI2	1
P04920	Anion exchange protein 2	SLC4A2	1
P05556	Integrin beta-1	ITGB1	1
P07305	Histone H1.0	H1-0	3
P07919	Cytochrome b-c1 complex subunit 6, mitochondrial	UQCRH	2
P08397	Porphobilinogen deaminase	HMBS	2
P09455	Retinol-binding protein 1	RBP1	1
P09543	2',3'-cyclic-nucleotide 3'-phosphodiesterase	CNP	3
P09913	Interferon-induced protein with tetratricopeptide repeats 2	IFIT2	1
P0C0L4	Complement C4-A	C4A	1
P10109	Adrenodoxin, mitochondrial	FDX1	1
P10301	Ras-related protein R-Ras	RRAS	1
P10412	Histone H1.4	H1-4	2
P10620	Microsomal glutathione S-transferase 1	MGST1	1
P11166	Solute carrier family 2, facilitated glucose transporter member 1	SLC2A1	1
P11274	Breakpoint cluster region protein	ABR	1
P11908	Ribose-phosphate pyrophosphokinase 2	PRPS2	2
P13591	Neural cell adhesion molecule 1	NCAM1	1
P13807	Glycogen [starch] synthase, muscle	GYS1	2
P14209	CD99 antigen	CD99	2
P14927	Cytochrome b-c1 complex subunit 7	UQCRB	1
P16083	Ribosyldihydronicotinamide dehydrogenase [quinone]	NQO2	1
P16220	Cyclic AMP-responsive element-binding protein 1	ATF1	1
P17480	Nucleolar transcription factor 1	UBTF	1
P18583	Protein SON	SON	2
P18615	Negative elongation factor E	NELFE	2
P19387	DNA-directed RNA polymerase II subunit RPB3	POLR2C	1
P19388	DNA-directed RNA polymerases I, II, and III subunit RPABC1	POLR2E	1
P19404	NADH dehydrogenase [ubiquinone] flavoprotein 2, mitochondrial	NDUFV2	2
P20020	Plasma membrane calcium-transporting ATPase 1	ATP2B1	3
P20338	Ras-related protein Rab-4A	RAB4A	1
P21127	Cyclin-dependent kinase 11B	CDK11A	1
P21964	Catechol O-methyltransferase	COMT	4
P23508	Colorectal mutant cancer protein	MCC	1
P24928	DNA-directed RNA polymerase II subunit RPB1	POLR2A	2
P24941	Cyclin-dependent kinase 2	CDK2	1
P25490	Transcriptional repressor protein YY1	YY1	2
P26440	Isovaleryl-CoA dehydrogenase, mitochondrial	IVD	2
P27105	Stomatin	STOM	1
P27361	Mitogen-activated protein kinase 3	MAPK3	1
P27448	MAP/microtubule affinity-regulating kinase 3	MARK1	2
P28340	DNA polymerase delta catalytic subunit	POLD1	2
P29372	DNA-3-methyladenine glycosylase	MPG	1
P29590	Protein PML	PML	1
P30154	Serine/threonine-protein phosphatase 2A 65 kDa regulatory subunit A beta isoform	PPP2R1B	1
P30260	Cell division cycle protein 27 homolog	CDC27	1
P30405	Peptidyl-prolyl cis-trans isomerase F, mitochondrial	PPIF	1
P30613	Pyruvate kinase PKLR	PKLR	1
P31942	Heterogeneous nuclear ribonucleoprotein H3	HNRNPH3	2
P32929	Cystathionine gamma-lyase	CTH	2
P33240	Cleavage stimulation factor subunit 2	CSTF2	3
P33527	Multidrug resistance-associated protein 1	ABCC1	1
P35221	Catenin alpha-1	CTNNA1	1
P35250	Replication factor C subunit 2	RFC2	1
P35269	General transcription factor IIF subunit 1	GTF2F1	2
P36873	Serine/threonine-protein phosphatase PP1-gamma catalytic subunit	PPP1CC	2
P37235	Hippocalcin-like protein 1	HPCAL1	1
P38435	Vitamin K-dependent gamma-carboxylase	GGCX	1
P42574	Caspase-3	CASP3	1
P42695	Condensin-2 complex subunit D3	NCAPD3	3
P42765	3-ketoacyl-CoA thiolase, mitochondrial	ACAA2	1
P43246	DNA mismatch repair protein Msh2	MSH2	5
P46087	Probable 28S rRNA (cytosine(4447)-C(5))-methyltransferase	NOP2	2
P47224	Guanine nucleotide exchange factor MSS4	RABIF	1
P48651	Phosphatidylserine synthase 1	PTDSS1	2
P48729	Casein kinase I isoform alpha	CSNK1A1	1
P49354	Protein farnesyltransferase/geranylgeranyltransferase type-1 subunit alpha	FNTA	2
P49366	Deoxyhypusine synthase	DHPS	2
P49418	Amphiphysin	AMPH	1
P49448	Glutamate dehydrogenase 2, mitochondrial	GLUD2	1
P49643	DNA primase large subunit	PRIM2	2
P49674	Casein kinase I isoform epsilon	CSNK1E	5
P49748	Very long-chain specific acyl-CoA dehydrogenase, mitochondrial	ACADVL	3
P49753	Acyl-coenzyme A thioesterase 2, mitochondrial	ACOT1	1
P49756	RNA-binding protein 25	RBM25	1
P49770	Translation initiation factor eIF-2B subunit beta	EIF2B2	1
P49841	Glycogen synthase kinase-3 beta	GSK3B	1
P49916	DNA ligase 3	LIG3	3
P50151	Guanine nucleotide-binding protein G(I)/G(S)/G(O) subunit gamma-10	GNG10	1
P50416	Carnitine O-palmitoyltransferase 1, liver isoform	CPT1A	1
P51151	Ras-related protein Rab-9A	RAB9A	1
P51580	Thiopurine S-methyltransferase	TPMT	1
P51688	N-sulphoglucosamine sulphohydrolase	SGSH	1
P51809	Vesicle-associated membrane protein 7	VAMP7	2
P52298	Nuclear cap-binding protein subunit 2	NCBP2	2
P52435	DNA-directed RNA polymerase II subunit RPB11-a	POLR2J	1
P52594	Arf-GAP domain and FG repeat-containing protein 1	AGFG1	1
P52758	2-iminobutanoate/2-iminopropanoate deaminase	RIDA	1
P53350	Serine/threonine-protein kinase PLK1	PLK1	1
P53367	Arfaptin-1	ARFIP1	2
P53611	Geranylgeranyl transferase type-2 subunit beta	RABGGTB	1
P53667	LIM domain kinase 1	LIMK1	1
P54098	DNA polymerase subunit gamma-1	POLG	1
P54619	5'-AMP-activated protein kinase subunit gamma-1	PRKAG1	1
P55011	Solute carrier family 12 member 2	SLC12A2	2
P56557	Transmembrane protein 50B	TMEM50B	1
P60903	Protein S100-A10	S100A10	2
P61244	Protein max	MAX	1
P61960	Ubiquitin-fold modifier 1	UFM1	1
P61966	AP-1 complex subunit sigma-1A	AP1S1	2
P62875	DNA-directed RNA polymerases I, II, and III subunit RPABC5	POLR2L	1
P62891	Large ribosomal subunit protein eL39	RPL39	1
P62993	Growth factor receptor-bound protein 2	GRB2	5
P63098	Calcineurin subunit B type 1	PPP3R1	2
P78406	mRNA export factor RAE1	RAE1	3
P80188	Neutrophil gelatinase-associated lipocalin	LCN2	1
P82675	Small ribosomal subunit protein uS5m	MRPS5	1
P82912	Small ribosomal subunit protein uS11m	MRPS11	1
P83916	Chromobox protein homolog 1	CBX1	1
P84085	ADP-ribosylation factor 5	ARF5	1
P84157	Matrix-remodeling-associated protein 7	MXRA7	1
Q00534	Cyclin-dependent kinase 6	CDK6	3
Q01968	Inositol polyphosphate 5-phosphatase OCRL	OCRL	2
Q02218	2-oxoglutarate dehydrogenase complex component E1	OGDH	1
Q02818	Nucleobindin-1	NUCB1	2
Q03001	Dystonin	DST	1
Q04941	Proteolipid protein 2	PLP2	1
Q06330	Recombining binding protein suppressor of hairless	RBPJ	1
Q06587	E3 ubiquitin-protein ligase RING1	RING1	1
Q07812	Apoptosis regulator BAX	BAX	1
Q07864	DNA polymerase epsilon catalytic subunit A	POLE	2
Q07866	Kinesin light chain 1	KLC1	5
Q08170	Serine/arginine-rich splicing factor 4	SRSF4	2
Q08AG7	Mitotic-spindle organizing protein 1	MZT1	2
Q0VAM2	Ras-GEF domain-containing family member 1B	RASGEF1B	1
Q10471	Polypeptide N-acetylgalactosaminyltransferase 2	GALNT2	3
Q10713	Mitochondrial-processing peptidase subunit alpha	PMPCA	2
Q12769	Nuclear pore complex protein Nup160	NUP160	3
Q12888	TP53-binding protein 1	TP53BP1	1
Q12907	Vesicular integral-membrane protein VIP36	LMAN2	3
Q12959	Disks large homolog 1	DLG1	1
Q13043	Serine/threonine-protein kinase 4	STK4	2
Q13061	Triadin	TRDN	1
Q13123	Protein Red	IK	1
Q13158	FAS-associated death domain protein	FADD	1
Q13216	DNA excision repair protein ERCC-8	ERCC8	16
Q13217	DnaJ homolog subfamily C member 3	DNAJC3	1
Q13308	Inactive tyrosine-protein kinase 7	PTK7	2
Q13371	Phosducin-like protein	PDCL	2
Q13409	Cytoplasmic dynein 1 intermediate chain 2	DYNC1I2	1
Q13438	Protein OS-9	OS9	2
Q13445	Transmembrane emp24 domain-containing protein 1	TMED1	1
Q13464	Rho-associated protein kinase 1	ROCK1	3
Q13480	GRB2-associated-binding protein 1	GAB1	1
Q13501	Sequestosome-1	SQSTM1	5
Q13542	Eukaryotic translation initiation factor 4E-binding protein 2	EIF4EBP2	1
Q13554	Calcium/calmodulin-dependent protein kinase type II subunit beta	CAMK2B	1
Q13564	NEDD8-activating enzyme E1 regulatory subunit	NAE1	1
Q13619	Cullin-4A	CUL4A	15
Q13643	Four and a half LIM domains protein 3	FHL3	1
Q13685	Angio-associated migratory cell protein	AAMP	2
Q13769	THO complex subunit 5 homolog	THOC5	1
Q13907	Isopentenyl-diphosphate Delta-isomerase 1	IDI1	1
Q14145	Kelch-like ECH-associated protein 1	KEAP1	1
Q14157	Ubiquitin-associated protein 2-like	UBAP2L	3
Q14186	Transcription factor Dp-1	TFDP1	2
Q14318	Peptidyl-prolyl cis-trans isomerase FKBP8	FKBP8	2
Q14525	Keratin, type I cuticular Ha3-II	KRT33B	4
Q14651	Plastin-1	PLS1	3
Q14671	Pumilio homolog 1	PUM1	2
Q14677	Clathrin interactor 1	CLINT1	2
Q14847	LIM and SH3 domain protein 1	LASP1	2
Q14919	Dr1-associated corepressor	DRAP1	1
Q15020	Squamous cell carcinoma antigen recognized by T-cells 3	SART3	1
Q15024	Exosome complex component RRP42	EXOSC7	1
Q15031	Leucine--tRNA ligase, mitochondrial	LARS2	1
Q15075	Early endosome antigen 1	EEA1	3
Q15126	Phosphomevalonate kinase	PMVK	2
Q15386	Ubiquitin-protein ligase E3C	UBE3C	2
Q15398	Disks large-associated protein 5	DLGAP5	1
Q15404	Ras suppressor protein 1	RSU1	1
Q15427	Splicing factor 3B subunit 4	SF3B4	2
Q15428	Splicing factor 3A subunit 2	SF3A2	1
Q15633	RISC-loading complex subunit TARBP2	TARBP2	1
Q15813	Tubulin-specific chaperone E	TBCE	2
Q16378	Proline-rich protein 4	PRR4	1
Q16513	Serine/threonine-protein kinase N2	PKN2	1
Q16514	Transcription initiation factor TFIID subunit 12	TAF12	1
Q16540	Large ribosomal subunit protein uL23m	MRPL23	2
Q16850	Lanosterol 14-alpha demethylase	CYP51A1	1
Q16880	2-hydroxyacylsphingosine 1-beta-galactosyltransferase	UGT8	1
Q17R31	Putative deoxyribonuclease TATDN3	TATDN3	1
Q2MJR0	Sprouty-related, EVH1 domain-containing protein 3	SPRED3	1
Q2NL82	Pre-rRNA-processing protein TSR1 homolog	TSR1	2
Q2TAY7	WD40 repeat-containing protein SMU1	SMU1	2
Q3YEC7	Rab-like protein 6	RABL6	1
Q4G0J3	La-related protein 7	LARP7	3
Q4V328	GRIP1-associated protein 1	GRIPAP1	1
Q4V339	Zinc-regulated GTPase metalloprotein activator 1F	ZNG1F	1
Q53EL6	Programmed cell death protein 4	PDCD4	1
Q53FA7	Quinone oxidoreductase PIG3	TP53I3	1
Q53H96	Pyrroline-5-carboxylate reductase 3	PYCR3	2
Q53HC9	EARP and GARP complex-interacting protein 1	EIPR1	1
Q58WW2	DDB1- and CUL4-associated factor 6	DCAF6	20
Q5H9S7	DDB1- and CUL4-associated factor 17	DCAF17	8
Q5JSD2	Voltage dependent anion channel 2 (Fragment)	VDAC2	1
Q5JUX0	Spindlin-3	SPIN3	3
Q5MNZ6	WD repeat domain phosphoinositide-interacting protein 3	WDR45B	1
Q5RI15	Cytochrome c oxidase assembly protein COX20, mitochondrial	COX20	1
Q5RKV6	Exosome complex component MTR3	EXOSC6	2
Q5SW79	Centrosomal protein of 170 kDa	CEP170	7
Q5T3I0	G patch domain-containing protein 4	GPATCH4	1
Q5T6F0	DDB1- and CUL4-associated factor 12	DCAF12	11
Q5T8P6	RNA-binding protein 26	RBM26	3
Q5TAQ9	DDB1- and CUL4-associated factor 8	DCAF8	23
Q5TC12	ATP synthase mitochondrial F1 complex assembly factor 1	ATPAF1	1
Q5UCC4	ER membrane protein complex subunit 10	EMC10	2
Q5VTL8	Pre-mRNA-splicing factor 38B	PRPF38B	1
Q5VTR2	E3 ubiquitin-protein ligase BRE1A	RNF20	3
Q5VW32	BRO1 domain-containing protein BROX	BROX	1
Q5XKP0	MICOS complex subunit MIC13	MICOS13	1
Q66K14	TBC1 domain family member 9B	TBC1D9B	2
Q66K64	DDB1- and CUL4-associated factor 15	DCAF15	10
Q66K74	Microtubule-associated protein 1S	MAP1S	1
Q66LE6	Serine/threonine-protein phosphatase 2A 55 kDa regulatory subunit B delta isoform	PPP2R2D	2
Q67AR4	MHC class II antigen (Fragment)	HLA-DPB1	1
Q6DKK2	Tetratricopeptide repeat protein 19, mitochondrial	TTC19	1
Q6FG99	RPLP1 protein	RPLP1	1
Q6GMV3	Putative peptidyl-tRNA hydrolase PTRHD1	PTRHD1	1
Q6IA86	Elongator complex protein 2	ELP2	2
Q6IAA8	Ragulator complex protein LAMTOR1	LAMTOR1	3
Q6IAN0	Dehydrogenase/reductase SDR family member 7B	DHRS7B	1
Q6IBW4	Condensin-2 complex subunit H2	NCAPH2	1
Q6NVY1	3-hydroxyisobutyryl-CoA hydrolase, mitochondrial	HIBCH	1
Q6P1L8	Large ribosomal subunit protein uL14m	MRPL14	2
Q6P1M0	Long-chain fatty acid transport protein 4	SLC27A4	1
Q6P2D8	X-ray radiation resistance-associated protein 1	XRRA1	1
Q6PD74	Alpha- and gamma-adaptin-binding protein p34	AAGAB	1
Q6PGP7	Superkiller complex protein 3	SKIC3	1
Q6PGQ7	Protein aurora borealis	BORA	1
Q6UW68	Transmembrane protein 205	TMEM205	1
Q6Y7W6	GRB10-interacting GYF protein 2	GIGYF2	1
Q6YHU6	tRNA (32-2'-O)-methyltransferase regulator THADA	THADA	1
Q6ZN17	Protein lin-28 homolog B	LIN28B	2
Q6ZXV5	Protein O-mannosyl-transferase TMTC3	TMTC3	2
Q70UQ0	Inhibitor of nuclear factor kappa-B kinase-interacting protein	IKBIP	3
Q71RC2	La-related protein 4	LARP4	4
Q7L2E3	ATP-dependent RNA helicase DHX30	DHX30	3
Q7L5Y6	DET1 homolog	DET1	4
Q7L8L6	FAST kinase domain-containing protein 5, mitochondrial	FASTKD5	2
Q7L9L4	MOB kinase activator 1B	MOB1A	1
Q7Z2W4	Zinc finger CCCH-type antiviral protein 1	ZC3HAV1	1
Q7Z353	Highly divergent homeobox	HDX	1
Q7Z3U7	Protein MON2 homolog	MON2	3
Q7Z422	SUZ domain-containing protein 1	SZRD1	1
Q7Z7B0	Filamin-A-interacting protein 1	FILIP1	1
Q7Z7E3	A disintegrin and metalloprotease 33 (Fragment)		1
Q86SX6	Glutaredoxin-related protein 5, mitochondrial	GLRX5	2
Q86U38	Nucleolar protein 9	NOP9	1
Q86UP2	Kinectin	KTN1	3
Q86UR5	Regulating synaptic membrane exocytosis protein 1	RIMS1	1
Q86UY6	N-alpha-acetyltransferase 40	NAA40	1
Q86VS8	Protein Hook homolog 3	HOOK3	2
Q86WC4	Osteopetrosis-associated transmembrane protein 1	OSTM1	1
Q86YM7	Homer protein homolog 1	HOMER1	1
Q86YP4	Transcriptional repressor p66-alpha	GATAD2A	4
Q8IUF1	Zinc-regulated GTPase metalloprotein activator 1B	ZNG1A	1
Q8IUR7	Armadillo repeat-containing protein 8	ARMC8	1
Q8IW35	Centrosomal protein of 97 kDa	CEP97	1
Q8IWJ2	GRIP and coiled-coil domain-containing protein 2	GCC2	1
Q8IWT0	Protein archease	ZBTB8OS	1
Q8IWX8	Calcium homeostasis endoplasmic reticulum protein	CHERP	1
Q8IXB1	DnaJ homolog subfamily C member 10	DNAJC10	1
Q8IYB3	Serine/arginine repetitive matrix protein 1	SRRM1	2
Q8IYS1	Xaa-Arg dipeptidase	PM20D2	1
Q8IZ07	Ankyrin repeat domain-containing protein 13A	ANKRD13A	1
Q8IZP0	Abl interactor 1	ABI1	1
Q8N128	Protein FAM177A1	FAM177A1	2
Q8N2C7	Protein unc-80 homolog	UNC80	1
Q8N2K0	Lysophosphatidylserine lipase ABHD12	ABHD12	1
Q8N2W9	E3 SUMO-protein ligase PIAS4	PIAS4	1
Q8N490	Probable hydrolase PNKD	PNKD	1
Q8N543	Prolyl 3-hydroxylase OGFOD1	OGFOD1	1
Q8N5D0	WD and tetratricopeptide repeats protein 1	WDTC1	15
Q8N684	Cleavage and polyadenylation specificity factor subunit 7	CPSF7	2
Q8N6L1	Keratinocyte-associated protein 2	KRTCAP2	1
Q8N6T3	ADP-ribosylation factor GTPase-activating protein 1	ARFGAP1	1
Q8N7H5	RNA polymerase II-associated factor 1 homolog	PAF1	1
Q8N806	Putative E3 ubiquitin-protein ligase UBR7	UBR7	1
Q8N9N8	Probable RNA-binding protein EIF1AD	EIF1AD	1
Q8NBF2	NHL repeat-containing protein 2	NHLRC2	1
Q8NBJ4	Golgi membrane protein 1	GOLM1	3
Q8NBS3	Solute carrier family 4 member 11	SLC4A11	1
Q8NBU5	Outer mitochondrial transmembrane helix translocase	ATAD1	1
Q8NC67	Neuropilin and tolloid-like protein 2	NETO2	1
Q8NCN5	Pyruvate dehydrogenase phosphatase regulatory subunit, mitochondrial	PDPR	1
Q8NEW0	Zinc transporter 7	SLC30A7	2
Q8NFQ8	Torsin-1A-interacting protein 2	TOR1AIP2	1
Q8NFW8	N-acylneuraminate cytidylyltransferase	CMAS	1
Q8NG27	E3 ubiquitin-protein ligase Praja-1	PJA1	1
Q8NHZ8	Anaphase-promoting complex subunit CDC26	CDC26	1
Q8NI22	Multiple coagulation factor deficiency protein 2	MCFD2	1
Q8NI60	Atypical kinase COQ8A, mitochondrial	COQ8A	1
Q8TAQ2	SWI/SNF complex subunit SMARCC2	SMARCC1	3
Q8TAV0	Protein FAM76A	FAM76A	1
Q8TB61	Adenosine 3'-phospho 5'-phosphosulfate transporter 1	SLC35B2	1
Q8TC07	TBC1 domain family member 15	TBC1D15	3
Q8TCJ2	Dolichyl-diphosphooligosaccharide--protein glycosyltransferase subunit STT3B	STT3B	2
Q8TDP1	Ribonuclease H2 subunit C	RNASEH2C	1
Q8TEL6	Short transient receptor potential channel 4-associated protein	TRPC4AP	15
Q8TEM1	Nuclear pore membrane glycoprotein 210	NUP210	5
Q8TF45	Zinc finger protein 418	ZNF418	1
Q8WU90	Zinc finger CCCH domain-containing protein 15	ZC3H15	4
Q8WUW1	Protein BRICK1	BRK1	1
Q8WV16	DDB1- and CUL4-associated factor 4	DCAF4	7
Q8WVD3	E3 ubiquitin-protein ligase RNF138	RNF138	1
Q8WVJ2	NudC domain-containing protein 2	NUDCD2	2
Q8WWK9	Cytoskeleton-associated protein 2	CKAP2	2
Q8WWM7	Ataxin-2-like protein	ATXN2L	1
Q8WWQ0	PH-interacting protein	PHIP	1
Q8WXI9	Transcriptional repressor p66-beta	GATAD2B	1
Q8WYA6	Beta-catenin-like protein 1	CTNNBL1	2
Q92466	DNA damage-binding protein 2	DDB2	15
Q92615	La-related protein 4B	LARP4B	1
Q92665	Small ribosomal subunit protein mS31	MRPS31	4
Q92667	A-kinase anchor protein 1, mitochondrial	AKAP1	1
Q92733	Proline-rich protein PRCC	PRCC	1
Q92896	Golgi apparatus protein 1	GLG1	3
Q92963	GTP-binding protein Rit1	RIT1	1
Q93075	Putative deoxyribonuclease TATDN2	TATDN2	1
Q969M3	Protein YIPF5	YIPF5	1
Q969Q5	Ras-related protein Rab-24	RAB24	1
Q969V6	Myocardin-related transcription factor A	MRTFA	1
Q96A26	Protein FAM162A	FAM162A	3
Q96A32	Myosin regulatory light chain 11	MYL11	2
Q96AC1	Fermitin family homolog 2	FERMT1	1
Q96AJ1	Clusterin-associated protein 1	CLUAP1	1
Q96AQ6	Pre-B-cell leukemia transcription factor-interacting protein 1	PBXIP1	1
Q96B01	RAD51-associated protein 1	RAD51AP1	1
Q96B26	Exosome complex component RRP43	EXOSC8	1
Q96B36	Proline-rich AKT1 substrate 1	AKT1S1	8
Q96BD8	Spindle and kinetochore-associated protein 1	SKA1	2
Q96BR5	Cytochrome c oxidase assembly factor 7	COA7	1
Q96C57	Protein CUSTOS	CUSTOS	1
Q96CD2	Phosphopantothenoylcysteine decarboxylase	PPCDC	1
Q96CS2	HAUS augmin-like complex subunit 1	HAUS1	1
Q96CW5	Gamma-tubulin complex component 3	TUBGCP3	1
Q96DA6	Mitochondrial import inner membrane translocase subunit TIM14	DNAJC19	1
Q96DH6	RNA-binding protein Musashi homolog 2	MSI2	1
Q96EI5	Transcription elongation factor A protein-like 4	TCEAL2	1
Q96EP5	DAZ-associated protein 1	DAZAP1	2
Q96EY8	Corrinoid adenosyltransferase MMAB	MMAB	1
Q96FV2	Secernin-2	SCRN2	1
Q96HY6	DDRGK domain-containing protein 1	DDRGK1	1
Q96I99	Succinate--CoA ligase [GDP-forming] subunit beta, mitochondrial	SUCLG2	2
Q96IJ6	Mannose-1-phosphate guanyltransferase alpha	GMPPA	1
Q96JB5	CDK5 regulatory subunit-associated protein 3	CDK5RAP3	3
Q96JK2	DDB1- and CUL4-associated factor 5	DCAF5	19
Q96KC2	ADP-ribosylation factor-like protein 5B	ARL5A	1
Q96KP1	Exocyst complex component 2	EXOC2	1
Q96KP4	Cytosolic non-specific dipeptidase	CNDP2	3
Q96L92	Sorting nexin-27	SNX27	2
Q96LB3	Intraflagellar transport protein 74 homolog	IFT74	1
Q96MW5	Conserved oligomeric Golgi complex subunit 8	COG8	2
Q96MX6	Dynein axonemal assembly factor 10	DNAAF10	2
Q96N67	Dedicator of cytokinesis protein 7	DOCK7	1
Q96RQ3	Methylcrotonoyl-CoA carboxylase subunit alpha, mitochondrial	MCCC1	1
Q96SW2	Protein cereblon	CRBN	13
Q96SY0	Integrator complex subunit 14	INTS14	1
Q96TA2	ATP-dependent zinc metalloprotease YME1L1	YME1L1	1
Q99439	Calponin-2	CNN2	1
Q99735	Microsomal glutathione S-transferase 2	MGST2	1
Q99741	Cell division control protein 6 homolog	CDC6	1
Q99808	Equilibrative nucleoside transporter 1	SLC29A1	1
Q99933	BAG family molecular chaperone regulator 1	BAG1	1
Q99986	Serine/threonine-protein kinase VRK1	VRK1	4
Q9BPU6	Dihydropyrimidinase-related protein 5	DPYSL5	1
Q9BPX5	Actin-related protein 2/3 complex subunit 5-like protein	ARPC5L	2
Q9BR76	Coronin-1B	CORO1B	2
Q9BRP4	Proteasomal ATPase-associated factor 1	PAAF1	2
Q9BRT9	DNA replication complex GINS protein SLD5	GINS4	1
Q9BRX2	Protein pelota homolog	PELO	3
Q9BRX5	DNA replication complex GINS protein PSF3	GINS3	2
Q9BSJ2	Gamma-tubulin complex component 2	TUBGCP2	2
Q9BSL1	Ubiquitin-associated domain-containing protein 1	UBAC1	1
Q9BT25	HAUS augmin-like complex subunit 8	HAUS8	2
Q9BT73	Proteasome assembly chaperone 3	PSMG3	2
Q9BTD8	RNA-binding protein 42	RBM42	2
Q9BTE3	Mini-chromosome maintenance complex-binding protein	MCMBP	5
Q9BTL3	RNA guanine-N7 methyltransferase activating subunit	RAMAC	1
Q9BTY7	Protein HGH1 homolog	HGH1	5
Q9BU61	NADH dehydrogenase [ubiquinone] 1 alpha subcomplex assembly factor 3	NDUFAF3	2
Q9BU89	Deoxyhypusine hydroxylase	DOHH	1
Q9BV20	Methylthioribose-1-phosphate isomerase	MRI1	2
Q9BV44	tRNA (guanine(6)-N2)-methyltransferase THUMP3	THUMPD3	1
Q9BVK2	Probable dolichyl pyrophosphate Glc1Man9GlcNAc2 alpha-1,3-glucosyltransferase	ALG8	1
Q9BVP2	Guanine nucleotide-binding protein-like 3	GNL3	4
Q9BVQ7	ATPase family gene 2 protein homolog B	AFG2B	1
Q9BVT8	Transmembrane and ubiquitin-like domain-containing protein 1	TMUB1	1
Q9BW27	Nuclear pore complex protein Nup85	NUP85	4
Q9BW61	DET1- and DDB1-associated protein 1	DDA1	18
Q9BW71	HIRA-interacting protein 3	HIRIP3	2
Q9BW91	ADP-ribose pyrophosphatase, mitochondrial	NUDT9	1
Q9BX40	Protein LSM14 homolog B	LSM14B	1
Q9BXV9	EKC/KEOPS complex subunit GON7	GON7	1
Q9BXW9	Fanconi anemia group D2 protein	FANCD2	3
Q9BY67	Cell adhesion molecule 1	CADM1	1
Q9BYD2	Large ribosomal subunit protein bL9m	MRPL9	2
Q9BYD6	Large ribosomal subunit protein uL1m	MRPL1	2
Q9BYG3	MKI67 FHA domain-interacting nucleolar phosphoprotein	NIFK	1
Q9BZE4	GTP-binding protein 4	GTPBP4	2
Q9BZF1	Oxysterol-binding protein-related protein 8	OSBPL8	1
Q9BZK7	F-box-like/WD repeat-containing protein TBL1XR1	TBL1XR1	2
Q9C0C2	182 kDa tankyrase-1-binding protein	TNKS1BP1	3
Q9C0C7	Activating molecule in BECN1-regulated autophagy protein 1	AMBRA1	38
Q9H0C8	Integrin-linked kinase-associated serine/threonine phosphatase 2C	ILKAP	1
Q9H0U6	Large ribosomal subunit protein uL18m	MRPL18	1
Q9H0W9	Ester hydrolase C11orf54	C11orf54	1
Q9H1I8	Activating signal cointegrator 1 complex subunit 2	ASCC2	1
Q9H2M9	Rab3 GTPase-activating protein non-catalytic subunit	RAB3GAP2	3
Q9H2U1	ATP-dependent DNA/RNA helicase DHX36	DHX36	2
Q9H2W6	Large ribosomal subunit protein mL46	MRPL46	2
Q9H3K2	Growth hormone-inducible transmembrane protein	GHITM	3
Q9H446	RWD domain-containing protein 1	RWDD1	2
Q9H496	Torsin-1A-interacting protein 2, isoform IFRG15	TOR1AIP2	3
Q9H6T3	RNA polymerase II-associated protein 3	RPAP3	2
Q9H7D7	WD repeat-containing protein 26	WDR26	1
Q9H814	Phosphorylated adapter RNA export protein	PHAX	1
Q9H845	Complex I assembly factor ACAD9, mitochondrial	ACAD9	2
Q9H857	5'-nucleotidase domain-containing protein 2	NT5DC2	4
Q9H8Y8	Golgi reassembly-stacking protein 2	GORASP2	1
Q9H936	Mitochondrial glutamate carrier 1	SLC25A22	3
Q9H9A5	CCR4-NOT transcription complex subunit 10	CNOT10	1
Q9H9E3	Conserved oligomeric Golgi complex subunit 4	COG4	1
Q9H9Q2	COP9 signalosome complex subunit 7b	COPS7B	1
Q9H9T3	Elongator complex protein 3	ELP3	1
Q9HB66	Alternative protein MKKS	MKKS	1
Q9HD26	Golgi-associated PDZ and coiled-coil motif-containing protein	GOPC	4
Q9HD47	Ran guanine nucleotide release factor	RANGRF	3
Q9NP81	Serine--tRNA ligase, mitochondrial	SARS2	1
Q9NPA8	Transcription and mRNA export factor ENY2	ENY2	2
Q9NPD3	Exosome complex component RRP41	EXOSC4	2
Q9NPI6	mRNA-decapping enzyme 1A	DCP1A	6
Q9NPL8	Complex I assembly factor TIMMDC1, mitochondrial	TIMMDC1	1
Q9NPQ8	Synembryn-A	RIC8A	1
Q9NQ50	Large ribosomal subunit protein mL40	MRPL40	1
Q9NR28	Diablo IAP-binding mitochondrial protein	DIABLO	2
Q9NR33	DNA polymerase epsilon subunit 4	POLE4	2
Q9NRL3	Striatin-4	STRN4	2
Q9NRY5	Protein FAM114A2	FAM114A2	1
Q9NRZ9	Lymphoid-specific helicase	HELLS	1
Q9NSB2	Keratin, type II cuticular Hb4	KRT84	3
Q9NTZ6	RNA-binding protein 12	RBM12	3
Q9NUQ6	SPATS2-like protein	SPATS2L	1
Q9NV56	MRG/MORF4L-binding protein	MRGBP	1
Q9NVH1	DnaJ homolog subfamily C member 11	DNAJC11	1
Q9NWS8	Required for meiotic nuclear division protein 1 homolog	RMND1	1
Q9NWU5	Large ribosomal subunit protein uL22m	MRPL22	1
Q9NWV4	CXXC motif containing zinc binding protein	CZIB	2
Q9NWZ8	Gem-associated protein 8	GEMIN8	1
Q9NX04	AFG2-interacting ribosome maturation factor	AIRIM	1
Q9NX46	ADP-ribosylhydrolase ARH3	ADPRS	2
Q9NX47	E3 ubiquitin-protein ligase MARCHF5	MARCHF5	2
Q9NX55	Huntingtin-interacting protein K	HYPK	1
Q9NX61	Transmembrane protein 161A	TMEM161A	2
Q9NX62	Golgi-resident adenosine 3',5'-bisphosphate 3'-phosphatase	BPNT2	1
Q9NX63	MICOS complex subunit MIC19	CHCHD3	6
Q9NXF7	DDB1- and CUL4-associated factor 16	DCAF16	7
Q9NYB0	Telomeric repeat-binding factor 2-interacting protein 1	TERF2IP	2
Q9NYH9	U3 small nucleolar RNA-associated protein 6 homolog	UTP6	1
Q9NYJ8	TGF-beta-activated kinase 1 and MAP3K7-binding protein 2	TAB2	4
Q9NYR9	NF-kappa-B inhibitor-interacting Ras-like protein 2	NKIRAS2	1
Q9NZB2	Constitutive coactivator of PPAR-gamma-like protein 1	FAM120A	1
Q9NZC3	Glycerophosphodiester phosphodiesterase 1	GDE1	1
Q9NZM5	Ribosome biogenesis protein NOP53	NOP53	1
Q9P016	Thymocyte nuclear protein 1	THYN1	2
Q9P0I2	ER membrane protein complex subunit 3	EMC3	2
Q9P1Y5	Calmodulin-regulated spectrin-associated protein 3	CAMSAP3	2
Q9P1Z2	Calcium-binding and coiled-coil domain-containing protein 1	CALCOCO1	1
Q9P2E9	Ribosome-binding protein 1	RRBP1	1
Q9P2X3	Protein IMPACT	IMPACT	1
Q9UBC2	Epidermal growth factor receptor substrate 15-like 1	EPS15L1	1
Q9UBF2	Coatomer subunit gamma-2	COPG2	1
Q9UBI1	COMM domain-containing protein 3	COMMD3	1
Q9UBL3	Set1/Ash2 histone methyltransferase complex subunit ASH2	ASH2L	3
Q9UBU8	Mortality factor 4-like protein 1	MORF4L1	1
Q9UDW1	Cytochrome b-c1 complex subunit 9	UQCR10	1
Q9UDY4	DnaJ homolog subfamily B member 4	DNAJB4	1
Q9UFG5	UPF0449 protein C19orf25	C19orf25	1
Q9UFW8	CGG triplet repeat-binding protein 1	CGGBP1	1
Q9UGI8	Testin	TES	2
Q9UH62	Armadillo repeat-containing X-linked protein 3	ARMCX3	3
Q9UHA4	Ragulator complex protein LAMTOR3	LAMTOR3	1
Q9UHB6	LIM domain and actin-binding protein 1	LIMA1	1
Q9UHQ9	NADH-cytochrome b5 reductase 1	CYB5R1	2
Q9UHR5	SAP30-binding protein	SAP30BP	1
Q9UI10	Translation initiation factor eIF-2B subunit delta	EIF2B4	1
Q9UIQ6	Leucyl-cystinyl aminopeptidase	LNPEP	1
Q9UIV1	CCR4-NOT transcription complex subunit 7	CNOT7	1
Q9UJU6	Drebrin-like protein	DBNL	2
Q9UJX2	Cell division cycle protein 23 homolog	CDC23	1
Q9UL15	BAG family molecular chaperone regulator 5	BAG5	9
Q9ULA0	Aspartyl aminopeptidase	DNPEP	1
Q9ULK4	Mediator of RNA polymerase II transcription subunit 23	MED23	2
Q9UMX0	Ubiquilin-1	UBQLN1	3
Q9UMY4	Sorting nexin-12	SNX12	3
Q9UNH7	Sorting nexin-6	SNX6	5
Q9UNL2	Translocon-associated protein subunit gamma	SSR3	1
Q9UPN7	Serine/threonine-protein phosphatase 6 regulatory subunit 1	PPP6R1	3
Q9UPN9	E3 ubiquitin-protein ligase TRIM33	TRIM33	1
Q9UPT5	Exocyst complex component 7	EXOC7	3
Q9Y256	CAAX prenyl protease 2	RCE1	1
Q9Y281	Cofilin-2	CFL2	2
Q9Y294	Histone chaperone ASF1A	ASF1A	2
Q9Y2Q5	Ragulator complex protein LAMTOR2	LAMTOR2	2
Q9Y2R0	Cytochrome c oxidase assembly factor 3 homolog, mitochondrial	COA3	1
Q9Y2V7	Conserved oligomeric Golgi complex subunit 6	COG6	1
Q9Y2X3	Nucleolar protein 58	NOP58	1
Q9Y2X9	Zinc finger protein 281	ZNF281	1
Q9Y2Y0	ADP-ribosylation factor-like protein 2-binding protein	ARL2BP	1
Q9Y312	Protein AAR2 homolog	AAR2	1
Q9Y333	U6 snRNA-associated Sm-like protein LSm2	LSM2	4
Q9Y3D5	Small ribosomal subunit protein bS18m	MRPS18C	1
Q9Y3D6	Mitochondrial fission 1 protein	FIS1	2
Q9Y4R8	Telomere length regulation protein TEL2 homolog	TELO2	2
Q9Y508	E3 ubiquitin-protein ligase RNF114	RNF114	1
Q9Y520	Protein PRRC2C	PRRC2C	4
Q9Y5A9	YTH domain-containing family protein 2	YTHDF2	1
Q9Y5B6	PAX3- and PAX7-binding protein 1	PAXBP1	1
Q9Y5J7	Mitochondrial import inner membrane translocase subunit Tim9	TIMM9	2
Q9Y5P4	Ceramide transfer protein	CERT1	2
Q9Y5Q9	General transcription factor 3C polypeptide 3	GTF3C3	2
Q9Y5U2	U5 small nuclear ribonucleoprotein TSSC4	TSSC4	1
Q9Y5V0	Zinc finger protein 706	ZNF706	1
Q9Y5V3	Melanoma-associated antigen D1	MAGED1	2
Q9Y5X1	Sorting nexin-9	SNX9	2
Q9Y676	Small ribosomal subunit protein mS40	MRPS18B	2
Q9Y6A5	Transforming acidic coiled-coil-containing protein 3	TACC3	1
Q9Y6D6	Brefeldin A-inhibited guanine nucleotide-exchange protein 1	ARFGEF1	2
Q9Y6E0	Serine/threonine-protein kinase 24	STK24	2
Q9Y6M9	NADH dehydrogenase [ubiquinone] 1 beta subcomplex subunit 9	NDUFB9	1
Q9Y6N7	Roundabout homolog 1	ROBO1	1
V6A6E5	MHC class I antigen	HLA-C	1

## Sheet: FLAG-Raptor
Supplementary Table 1, related to Figure 1: Mass Spectrometry Analysis of FLAG-Raptor containing Protein Complex in U118-MG cells
Protein	Protein Name	Gene Name	Peptides
P30046	D-dopachrome decarboxylase	DDT	1
A6NIE6	Putative RRN3-like protein RRN3P2	RRN3P2	1
A7XYQ1	Sine oculis-binding protein homolog	SOBP	1
Q6ZN79	Zinc finger protein 705A	ZNF705A	1
B1AJZ9	Forkhead-associated domain-containing protein 1	FHAD1	1
O00161	Synaptosomal-associated protein 23	SNAP23	3
O00165	HCLS1-associated protein X-1	HAX1	7
O00193	Small acidic protein	SMAP	2
O00217	NADH dehydrogenase [ubiquinone] iron-sulfur protein 8, mitochondrial	NDUFS8	2
O00418	Eukaryotic elongation factor 2 kinase	EEF2K	4
O00425	Insulin-like growth factor 2 mRNA-binding protein 3	IGF2BP3	4
O00505	Importin subunit alpha-4	KPNA3	2
O14639	Actin-binding LIM protein 1	ABLIM1	2
O14654	Insulin receptor substrate 4	IRS4	4
O15116	U6 snRNA-associated Sm-like protein LSm1	LSM1	1
O15173	Membrane-associated progesterone receptor component 2	PGRMC2	2
O15212	Prefoldin subunit 6	PFDN6	4
O15297	Protein phosphatase 1D	PPM1D	1
O15403	Monocarboxylate transporter 7	SLC16A6	1
O15499	Homeobox protein goosecoid-2	GSC2	1
O43169	Cytochrome b5 type B	CYB5B	1
O43324	Eukaryotic translation elongation factor 1 epsilon-1	EEF1E1	1
O43427	Acidic fibroblast growth factor intracellular-binding protein	FIBP	7
O43504	Ragulator complex protein LAMTOR5	LAMTOR5	5
O43583	Density-regulated protein	DENR	1
O43684	Mitotic checkpoint protein BUB3	BUB3	1
O43719	HIV Tat-specific factor 1	HTATSF1	1
O43765	Small glutamine-rich tetratricopeptide repeat-containing protein alpha	SGTA	3
O43805	Microtubule nucleation factor SSNA1	SSNA1	1
O43823	A-kinase anchor protein 8	AKAP8	1
O60220	Mitochondrial import inner membrane translocase subunit Tim8 A	TIMM8A	1
O60397	Putative cytochrome c oxidase subunit 7A3, mitochondrial	COX7A2P2	1
O60613	Selenoprotein F	SELENOF	1
Q8IWZ3	Ankyrin repeat and KH domain-containing protein 1	ANKHD1	1
O75190	DnaJ homolog subfamily B member 6	DNAJB6	8
O75306	NADH dehydrogenase [ubiquinone] iron-sulfur protein 2, mitochondrial	NDUFS2	1
O75832	26S proteasome non-ATPase regulatory subunit 10	PSMD10	1
O95292	Vesicle-associated membrane protein-associated protein B/C	VAPB	3
O95295	SNARE-associated protein Snapin	SNAPIN	4
O95619	YEATS domain-containing protein 4	YEATS4	1
O95721	Synaptosomal-associated protein 29	SNAP29	1
O95757	Heat shock 70 kDa protein 4L	HSPA4L	6
O95777	U6 snRNA-associated Sm-like protein LSm8	LSM8	1
O95793	Double-stranded RNA-binding protein Staufen homolog 1	STAU1	2
O95817	BAG family molecular chaperone regulator 3	BAG3	8
O95831	Apoptosis-inducing factor 1, mitochondrial	AIFM1	2
O96019	Actin-like protein 6A	ACTL6A	2
P00390	Glutathione reductase, mitochondrial	GSR	3
P00441	Superoxide dismutase [Cu-Zn]	SOD1	1
P00491	Purine nucleoside phosphorylase	PNP	1
P04259	Keratin, type II cytoskeletal 6B	KRT6B	54
P05062	Fructose-bisphosphate aldolase B	ALDOB	1
P05090	Apolipoprotein D	APOD	2
P06730	Eukaryotic translation initiation factor 4E	EIF4E	5
P07858	Cathepsin B	CTSB	1
P07919	Cytochrome b-c1 complex subunit 6, mitochondrial	UQCRH	1
P08047	Transcription factor Sp1	SP1	1
P08758	Annexin A5	ANXA5	1
P0DPB6	DNA-directed RNA polymerases I and III subunit RPAC2	POLR1D	2
P10412	Histone H1.4	H1-4	9
P10606	Cytochrome c oxidase subunit 5B, mitochondrial	COX5B	3
P13995	Bifunctional methylenetetrahydrofolate dehydrogenase/cyclohydrolase, mitochondrial	MTHFD2	2
P15259	Phosphoglycerate mutase 2	PGAM2	1
P16949	Stathmin	STMN1	2
P20618	Proteasome subunit beta type-1	PSMB1	3
P21796	Voltage-dependent anion-selective channel protein 1	VDAC1	1
P21980	Protein-glutamine gamma-glutamyltransferase 2	TGM2	1
P35321	Cornifin-A	SPRR1A	1
P35325	Small proline-rich protein 2B	SPRR2B	2
P25685	DnaJ homolog subfamily B member 1	DNAJB1	2
P26196	Probable ATP-dependent RNA helicase DDX6	DDX6	2
P27635	60S ribosomal protein L10	RPL10	2
P27708	CAD protein	CAD	1
P28482	Mitogen-activated protein kinase 1	MAPK1	1
P28799	Progranulin	GRN	2
P31040	Succinate dehydrogenase [ubiquinone] flavoprotein subunit, mitochondrial	SDHA	6
P31930	Cytochrome b-c1 complex subunit 1, mitochondrial	UQCRC1	1
P33908	Mannosyl-oligosaccharide 1,2-alpha-mannosidase IA	MAN1A1	1
P35080	Profilin-2	PFN2	2
P35244	Replication protein A 14 kDa subunit	RPA3	1
P37275	Zinc finger E-box-binding homeobox 1	ZEB1	1
P38570	Integrin alpha-E	ITGAE	1
P40222	Alpha-taxilin	TXLNA	2
P45880	Voltage-dependent anion-selective channel protein 2	VDAC2	3
P46379	Large proline-rich protein BAG6	BAG6	2
P47736	Rap1 GTPase-activating protein 1	RAP1GAP	1
P49006	MARCKS-related protein	MARCKSL1	1
P49247	Ribose-5-phosphate isomerase	RPIA	1
P49406	39S ribosomal protein L19, mitochondrial	MRPL19	1
P49721	Proteasome subunit beta type-2	PSMB2	3
P50402	Emerin	EMD	5
P51523	Zinc finger protein 84	ZNF84	1
P51858	Hepatoma-derived growth factor	HDGF	1
P51970	NADH dehydrogenase [ubiquinone] 1 alpha subcomplex subunit 8	NDUFA8	1
P52292	Importin subunit alpha-1	KPNA2	1
Q9H1A7	DNA-directed RNA polymerase II subunit RPB11-b2	POLR2J3	1
P55145	Mesencephalic astrocyte-derived neurotrophic factor	MANF	1
P58418	Clarin-1	CLRN1	1
P58546	Myotrophin	MTPN	1
P60468	Protein transport protein Sec61 subunit beta	SEC61B	2
P84085	ADP-ribosylation factor 5	ARF5	2
P61513	60S ribosomal protein L37a	RPL37A	1
P61803	Dolichyl-diphosphooligosaccharide--protein glycosyltransferase subunit DAD1	DAD1	1
P62987	Ubiquitin-60S ribosomal protein L40	UBA52	5
P63098	Calcineurin subunit B type 1	PPP3R1	3
Q00059	Transcription factor A, mitochondrial	TFAM	2
Q00535	Cyclin-dependent kinase 5	CDK5	8
Q00587	Cdc42 effector protein 1	CDC42EP1	5
Q8WU68	Splicing factor U2AF 26 kDa subunit	U2AF1L4	1
Q01469	Fatty acid-binding protein 5	FABP5	5
Q01518	Adenylyl cyclase-associated protein 1	CAP1	2
Q01668	Voltage-dependent L-type calcium channel subunit alpha-1D	CACNA1D	3
Q04760	Lactoylglutathione lyase	GLO1	3
Q08379	Golgin subfamily A member 2	GOLGA2	1
Q0P6D6	Coiled-coil domain-containing protein 15	CCDC15	2
Q0VGL1	Ragulator complex protein LAMTOR4	LAMTOR4	3
Q12962	Transcription initiation factor TFIID subunit 10	TAF10	1
Q13464	Rho-associated protein kinase 1	ROCK1	1
Q13541	Eukaryotic translation initiation factor 4E-binding protein 1	EIF4EBP1	7
Q13542	Eukaryotic translation initiation factor 4E-binding protein 2	EIF4EBP2	6
Q13868	Exosome complex component RRP4	EXOSC2	1
Q14165	Malectin	MLEC	1
Q14197	Peptidyl-tRNA hydrolase ICT1, mitochondrial	MRPL58	1
Q14244	Ensconsin	MAP7	1
Q14671	Pumilio homolog 1	PUM1	4
Q14943	Killer cell immunoglobulin-like receptor 3DS1	KIR3DS1	1
Q14974	Importin subunit beta-1	KPNB1	2
Q15056	Eukaryotic translation initiation factor 4H	EIF4H	1
Q15773	Myeloid leukemia factor 2	MLF2	2
Q16204	Coiled-coil domain-containing protein 6	CCDC6	18
Q16576	Histone-binding protein RBBP7	RBBP7	6
Q3MIT2	tRNA pseudouridine synthase Pus10	PUS10	1
Q3ZCM7	Tubulin beta-8 chain	TUBB8	5
Q4G0N8	Sodium/hydrogen exchanger 10	SLC9C1	1
Q5FWF5	N-acetyltransferase ESCO1	ESCO1	1
Q5JSZ5	Protein PRRC2B	PRRC2B	2
Q5SW79	Centrosomal protein of 170 kDa	CEP170	3
Q9Y6H1	Coiled-coil-helix-coiled-coil-helix domain-containing protein 2	CHCHD2	1
Q5U651	Ras-interacting protein 1	RASIP1	1
Q6IAA8	Ragulator complex protein LAMTOR1	LAMTOR1	10
Q6P582	Mitotic-spindle organizing protein 2A	MZT2A	1
Q6P1L8	39S ribosomal protein L14, mitochondrial	MRPL14	1
Q6SJ93	Serine protease FAM111B	FAM111B	1
Q70UQ0	Inhibitor of nuclear factor kappa-B kinase-interacting protein	IKBIP	1
Q71U36	Tubulin alpha-1A chain	TUBA1A	13
Q71UM5	40S ribosomal protein S27-like	RPS27L	2
Q7L523	Ras-related GTP-binding protein A	RRAGA	8
Q9H8S9	MOB kinase activator 1A	MOB1A	1
Q7Z417	FMR1-interacting protein NUFIP2	NUFIP2	3
Q7Z6E9	E3 ubiquitin-protein ligase RBBP6	RBBP6	2
Q86SU0	Immunoglobulin-like domain-containing receptor 1	ILDR1	1
Q86UW7	Calcium-dependent secretion activator 2	CADPS2	1
Q86YS7	C2 domain-containing protein 5	C2CD5	8
Q8IWC1	MAP7 domain-containing protein 3	MAP7D3	1
Q8IYB4	PEX5-related protein	PEX5L	1
Q8IYN6	UBA-like domain-containing protein 2	UBALD2	1
Q8IZ21	Phosphatase and actin regulator 4	PHACTR4	6
Q8IZH2	5-3 exoribonuclease 1	XRN1	1
Q8N2M8	CLK4-associating serine/arginine rich protein	CLASRP	1
Q8N6M5	Probable inactive allantoicase	ALLC	1
Q8N8S7	Protein enabled homolog	ENAH	2
Q8N9L7	Putative uncharacterized protein FLJ36925		2
Q8NBS9	Thioredoxin domain-containing protein 5	TXNDC5	3
Q8NEX9	Short-chain dehydrogenase/reductase family 9C member 7	SDR9C7	2
Q8TDN4	CDK5 and ABL1 enzyme substrate 1	CABLES1	2
Q8TF72	Protein Shroom3	SHROOM3	1
Q8WUA2	Peptidyl-prolyl cis-trans isomerase-like 4	PPIL4	3
Q8WVC0	RNA polymerase-associated protein LEO1	LEO1	2
Q8WVH0	Complexin-3	CPLX3	1
Q8WWM7	Ataxin-2-like protein	ATXN2L	2
Q8WXX5	DnaJ homolog subfamily C member 9	DNAJC9	2
Q8WYH8	Inhibitor of growth protein 5	ING5	1
Q92900	Regulator of nonsense transcripts 1	UPF1	1
Q92917	G-patch domain and KOW motifs-containing protein	GPKOW	15
Q96A26	Protein FAM162A	FAM162A	1
Q96AG4	Leucine-rich repeat-containing protein 59	LRRC59	1
Q96AQ6	Pre-B-cell leukemia transcription factor-interacting protein 1	PBXIP1	1
Q96AY3	Peptidyl-prolyl cis-trans isomerase FKBP10	FKBP10	3
Q96B36	Proline-rich AKT1 substrate 1	AKT1S1	14
Q96BR5	Cytochrome c oxidase assembly factor 7	COA7	2
Q96C19	EF-hand domain-containing protein D2	EFHD2	1
Q96EA4	Protein Spindly	SPDL1	1
Q96EI5	Transcription elongation factor A protein-like 4	TCEAL4	1
Q96EY4	Translation machinery-associated protein 16	TMA16	1
Q96F86	Enhancer of mRNA-decapping protein 3	EDC3	2
Q96GC5	39S ribosomal protein L48, mitochondrial	MRPL48	2
Q96IV6	Fatty acid hydroxylase domain-containing protein 2	FAXDC2	1
Q96IX5	ATP synthase membrane subunit K, mitochondrial	ATP5MK	1
Q96JI7	Spatacsin	SPG11	1
Q96JN8	Neuralized-like protein 4	NEURL4	1
Q96KM6	Zinc finger protein 512B	ZNF512B	6
Q96NT1	Nucleosome assembly protein 1-like 5	NAP1L5	1
Q96PK6	RNA-binding protein 14	RBM14	1
Q99470	Stromal cell-derived factor 2	SDF2	3
Q99471	Prefoldin subunit 5	PFDN5	3
Q99615	DnaJ homolog subfamily C member 7	DNAJC7	9
Q99653	Calcineurin B homologous protein 1	CHP1	2
Q99962	Endophilin-A1	SH3GL2	1
Q9BQ61	Telomerase RNA component interacting RNase	TRIR	1
Q9BQP7	Mitochondrial genome maintenance exonuclease 1	MGME1	1
Q9BRJ6	Uncharacterized protein C7orf50	C7orf50	1
Q9BRK5	45 kDa calcium-binding protein	SDF4	4
Q9BSD7	Cancer-related nucleoside-triphosphatase	NTPCR	8
Q9BTT0	Acidic leucine-rich nuclear phosphoprotein 32 family member E	ANP32E	1
Q9BTV4	Transmembrane protein 43	TMEM43	3
Q9BU61	NADH dehydrogenase [ubiquinone] 1 alpha subcomplex assembly factor 3	NDUFAF3	1
Q9BUL8	Programmed cell death protein 10	PDCD10	1
Q9BV68	E3 ubiquitin-protein ligase RNF126	RNF126	1
Q9BVG4	Protein PBDC1	PBDC1	2
Q9BW61	DET1- and DDB1-associated protein 1	DDA1	1
Q9BXR0	Queuine tRNA-ribosyltransferase catalytic subunit 1	QTRT1	3
Q9BYJ9	YTH domain-containing family protein 1	YTHDF1	1
Q9C0B0	RING finger protein unkempt homolog	UNK	17
Q9GZP4	PITH domain-containing protein 1	PITHD1	1
Q9H2U6	Putative uncharacterized protein encoded by LINC00597	LINC00597	1
Q9H3E2	Sorting nexin-25	SNX25	1
Q9H3K2	Growth hormone-inducible transmembrane protein	GHITM	1
Q9H3P7	Golgi resident protein GCP60	ACBD3	2
Q9H6F5	Coiled-coil domain-containing protein 86	CCDC86	2
Q9H814	Phosphorylated adapter RNA export protein	PHAX	2
Q9H910	Jupiter microtubule associated homolog 2	JPT2	3
Q9HA64	Ketosamine-3-kinase	FN3KRP	1
Q9HB90	Ras-related GTP-binding protein C	RRAGC	12
Q9HC35	Echinoderm microtubule-associated protein-like 4	EML4	3
Q9HC44	Vasculin-like protein 1	GPBP1L1	8
Q9HCN8	Stromal cell-derived factor 2-like protein 1	SDF2L1	5
Q9NQ94	APOBEC1 complementation factor	A1CF	1
Q9NQL2	Ras-related GTP-binding protein D	RRAGD	8
Q9NQP4	Prefoldin subunit 4	PFDN4	3
Q9NR33	DNA polymerase epsilon subunit 4	POLE4	3
Q9NRN7	L-aminoadipate-semialdehyde dehydrogenase-phosphopantetheinyl transferase	AASDHPPT	2
Q9NS86	LanC-like protein 2	LANCL2	1
Q9NTJ4	Alpha-mannosidase 2C1	MAN2C1	1
Q9NUP9	Protein lin-7 homolog C	LIN7C	3
Q9NWS0	PIH1 domain-containing protein 1	PIH1D1	1
Q9NX40	OCIA domain-containing protein 1	OCIAD1	1
Q9NX63	MICOS complex subunit MIC19	CHCHD3	1
Q9NXS2	Glutaminyl-peptide cyclotransferase-like protein	QPCTL	2
Q9NXW2	DnaJ homolog subfamily B member 12	DNAJB12	1
Q9NYW7	Taste receptor type 2 member 1	TAS2R1	1
Q9NZ01	Very-long-chain enoyl-CoA reductase	TECR	2
Q9P035	Very-long-chain (3R)-3-hydroxyacyl-CoA dehydratase 3	HACD3	1
Q9P2E9	Ribosome-binding protein 1	RRBP1	2
Q9UBI6	Guanine nucleotide-binding protein G(I)/G(S)/G(O) subunit gamma-12	GNG12	1
Q9UBW7	Zinc finger MYM-type protein 2	ZMYM2	1
Q9UHA4	Ragulator complex protein LAMTOR3	LAMTOR3	5
Q9UHD1	Cysteine and histidine-rich domain-containing protein 1	CHORDC1	1
Q9UIL1	Short coiled-coil protein	SCOC	1
Q9UK76	Jupiter microtubule associated homolog 1	JPT1	1
Q9UKK9	ADP-sugar pyrophosphatase	NUDT5	1
Q9UKV3	Apoptotic chromatin condensation inducer in the nucleus	ACIN1	2
Q9UL15	BAG family molecular chaperone regulator 5	BAG5	4
Q9ULX6	A-kinase anchor protein 8-like	AKAP8L	3
Q9UMX0	Ubiquilin-1	UBQLN1	3
Q9UPN6	SR-related and CTD-associated factor 8	SCAF8	1
Q9UPQ9	Trinucleotide repeat-containing gene 6B protein	TNRC6B	1
Q9Y266	Nuclear migration protein nudC	NUDC	3
Q9Y2B9	cAMP-dependent protein kinase inhibitor gamma	PKIG	1
Q9Y2Q5	Ragulator complex protein LAMTOR2	LAMTOR2	6
Q9Y2R9	28S ribosomal protein S7, mitochondrial	MRPS7	1
Q9Y2S7	Polymerase delta-interacting protein 2	POLDIP2	3
Q9Y3C1	Nucleolar protein 16	NOP16	1
Q9Y3C6	Peptidyl-prolyl cis-trans isomerase-like 1	PPIL1	1
Q9Y3F4	Serine-threonine kinase receptor-associated protein	STRAP	5
Q9Y3R4	Sialidase-2	NEU2	1
Q9Y5L4	Mitochondrial import inner membrane translocase subunit Tim13	TIMM13	3
Q9Y5X1	Sorting nexin-9	SNX9	6

## Sheet: U118-MG -aa VS +aa
Supplementary Table 1, related to Figure 2: 4D-Labelfree quantitative phosphoproteomics analysis of amino acid phosphorylated proteins in U118-MG cells
Protein	Proteins	Amino acid	Modified peptide	Position in peptide	Sequence length	Description	Protein Name	Gene Name	-10LgP	Mass	ppm	Start	End	AScore	PTMLocation	MotifSequence	Intensity U118aa	Intensity U118aaT1
P23497	P23497|SP100_HUMAN	S	SLTWPPSGS(+79.97)PSHAGTTPPENGLSEHPC(+57.02)ETEQINAK	9	35	Nuclear autoantigen Sp-100 OS=Homo sapiens OX=9606 GN=SP100 PE=1 SV=3	Nuclear autoantigen Sp-100	SP100	48.58	3792.67	-5	183	217	S9:Phosphorylation (STY):0.00;C27:Carbamidomethylation:1000.00	S191	TWPPSGSPSHAGT	98909	198370
Q68EM7	Q68EM7|RHG17_HUMAN	S	SPS(+79.97)PPTQHTGQPPGQPSAPSQLSAPR	3	26	Rho GTPase-activating protein 17 OS=Homo sapiens OX=9606 GN=ARHGAP17 PE=1 SV=1	Rho GTPase-activating protein 17	ARHGAP17	64.62	2686.25	-1.8	674	699	S3:Phosphorylation (STY):8.22	S676	PPTRSPSPPTQHT	247139	505791
P46821	P46821|MAP1B_HUMAN	S	TATC(+57.02)HSSSS(+79.97)PPIDAASAEPYGFR	9	23	Microtubule-associated protein 1B OS=Homo sapiens OX=9606 GN=MAP1B PE=1 SV=2	Microtubule-associated protein 1B	MAP1B	83.13	2488.04	-3.6	1811	1833	C4:Carbamidomethylation:1000.00;S9:Phosphorylation (STY):7.32	S1819	TCHSSSSPPIDAA	605707	1.24415e+06
P29692	P29692|EF1D_HUMAN	T	KPAT(+79.97)PAEDDEDDDIDLFGS(+79.97)DNEEEDKEAAQLR	4	32	Elongation factor 1-delta OS=Homo sapiens OX=9606 GN=EEF1D PE=1 SV=5	Elongation factor 1-delta	EEF1D	86.17	3736.48	-2.4	144	175		T147	PAKKPATPAEDDE	186836	385718
P29692	P29692|EF1D_HUMAN	S	KPAT(+79.97)PAEDDEDDDIDLFGS(+79.97)DNEEEDKEAAQLR	19	32	Elongation factor 1-delta OS=Homo sapiens OX=9606 GN=EEF1D PE=1 SV=5	Elongation factor 1-delta	EEF1D	86.17	3736.48	-2.4	144	175		S162	DIDLFGSDNEEED	186836	385718
P46937	P46937|YAP1_HUMAN	S	QAS(+79.97)TDAGTAGALTPQHVR	3	18	Transcriptional coactivator YAP1 OS=Homo sapiens OX=9606 GN=YAP1 PE=1 SV=2	Transcriptional coactivator YAP1	YAP1	72.48	1859.85	1.8	107	124	S3:Phosphorylation (STY):30.46	S109	SHSRQASTDAGTA	117356	242657
Q12888	Q12888|TP53B_HUMAN	S	SDS(+79.97)PEIPFQAAAGPSDGLDASSPGNSFVGLR	3	31	TP53-binding protein 1 OS=Homo sapiens OX=9606 GN=TP53BP1 PE=1 SV=2	TP53-binding protein 1	TP53BP1	101.53	3125.4	1.5	1460	1490	S3:Phosphorylation (STY):0.00	S1462	ALRRSDSPEIPFQ	75607.8	156801
Q9UQ35	Q9UQ35|SRRM2_HUMAN	S	S(+79.97)VS(+79.97)PC(+57.02)SNVESR	1	11	Serine/arginine repetitive matrix protein 2 OS=Homo sapiens OX=9606 GN=SRRM2 PE=1 SV=2	Serine/arginine repetitive matrix protein 2	SRRM2	59.38	1380.48	-1.7	952	962	S1:Phosphorylation (STY):40.91;S3:Phosphorylation (STY):19.27;C5:Carbamidomethylation:1000.00	S952	TPRRSRSVSPCSN	182916	382033
Q9UQ35	Q9UQ35|SRRM2_HUMAN	S	S(+79.97)VS(+79.97)PC(+57.02)SNVESR	3	11	Serine/arginine repetitive matrix protein 2 OS=Homo sapiens OX=9606 GN=SRRM2 PE=1 SV=2	Serine/arginine repetitive matrix protein 2	SRRM2	59.38	1380.48	-1.7	952	962	S1:Phosphorylation (STY):40.91;S3:Phosphorylation (STY):19.27;C5:Carbamidomethylation:1000.00	S954	RRSRSVSPCSNVE	182916	382033
Q99733	Q99733|NP1L4_HUMAN	S	EFITGDVEPTDAESEWHS(+79.97)ENEEEEK	18	25	Nucleosome assembly protein 1-like 4 OS=Homo sapiens OX=9606 GN=NAP1L4 PE=1 SV=1	Nucleosome assembly protein 1-like 4	NAP1L4	93.93	3015.18	2.2	108	132	S18:Phosphorylation (STY):28.74	S125	AESEWHSENEEEE	398765	833899
Q8IZP2	Q8IZP2|ST134_HUMAN:P50502|F10A1_HUMAN	S	ADEPS(+79.97)S(+79.97)EES(+79.97)DLEIDK	5	15	Putative protein FAM10A4 OS=Homo sapiens OX=9606 GN=ST13P4 PE=5 SV=1	Putative protein FAM10A4	ST13P4	80.27	1902.61	1.8	67	81		S71	LKADEPSSEESDL	252729	528791
Q8IZP2	Q8IZP2|ST134_HUMAN:P50502|F10A1_HUMAN	S	ADEPS(+79.97)S(+79.97)EES(+79.97)DLEIDK	6	15	Putative protein FAM10A4 OS=Homo sapiens OX=9606 GN=ST13P4 PE=5 SV=1	Putative protein FAM10A4	ST13P4	80.27	1902.61	1.8	67	81		S72	KADEPSSEESDLE	252729	528791
Q8IZP2	Q8IZP2|ST134_HUMAN:P50502|F10A1_HUMAN	S	ADEPS(+79.97)S(+79.97)EES(+79.97)DLEIDK	9	15	Putative protein FAM10A4 OS=Homo sapiens OX=9606 GN=ST13P4 PE=5 SV=1	Putative protein FAM10A4	ST13P4	80.27	1902.61	1.8	67	81		S75	EPSSEESDLEIDK	252729	528791
P02545	P02545|LMNA_HUMAN	S	LS(+79.97)PS(+79.97)PTSQR	2	9	Prelamin-A/C OS=Homo sapiens OX=9606 GN=LMNA PE=1 SV=1	Prelamin-A/C	LMNA	40.68	1131.44	-2.2	389	397	S2:Phosphorylation (STY):67.69;S4:Phosphorylation (STY):32.28	S390	EERLRLSPSPTSQ	50783.6	106588
P02545	P02545|LMNA_HUMAN	S	LS(+79.97)PS(+79.97)PTSQR	4	9	Prelamin-A/C OS=Homo sapiens OX=9606 GN=LMNA PE=1 SV=1	Prelamin-A/C	LMNA	40.68	1131.44	-2.2	389	397	S2:Phosphorylation (STY):67.69;S4:Phosphorylation (STY):32.28	S392	RLRLSPSPTSQRS	50783.6	106588
P02545	P02545|LMNA_HUMAN	S	LSPS(+79.97)PTS(+79.97)QR	4	9	Prelamin-A/C OS=Homo sapiens OX=9606 GN=LMNA PE=1 SV=1	Prelamin-A/C	LMNA	28.27	1131.44	-3.8	389	397	S4:Phosphorylation (STY):14.04;S7:Phosphorylation (STY):0.00	S392	RLRLSPSPTSQRS	50783.6	106588
P02545	P02545|LMNA_HUMAN	S	LSPS(+79.97)PTS(+79.97)QR	7	9	Prelamin-A/C OS=Homo sapiens OX=9606 GN=LMNA PE=1 SV=1	Prelamin-A/C	LMNA	28.27	1131.44	-3.8	389	397	S4:Phosphorylation (STY):14.04;S7:Phosphorylation (STY):0.00	S395	LSPSPTSQRSRGR	50783.6	106588
Q8IZP0	Q8IZP0|ABI1_HUMAN	S	LGSQHS(+79.97)PGR	6	9	Abl interactor 1 OS=Homo sapiens OX=9606 GN=ABI1 PE=1 SV=4	Abl interactor 1	ABI1	53.15	1017.44	-1.4	220	228	S6:Phosphorylation (STY):41.59	S225	RLGSQHSPGRTAS	82736.5	174963
P78559	P78559|MAP1A_HUMAN	S	WLAES(+79.97)PVGLPPEEEDKLTR	5	19	Microtubule-associated protein 1A OS=Homo sapiens OX=9606 GN=MAP1A PE=1 SV=6	Microtubule-associated protein 1A	MAP1A	67.63	2245.07	-4.9	1772	1790	S5:Phosphorylation (STY):78.91	S1776	ERWLAESPVGLPP	82781.6	175328
P22059	P22059|OSBP1_HUMAN	S	GDM(+15.99)S(+79.97)DEDDENEFFDAPEIITMPENLGHK	4	28	Oxysterol-binding protein 1 OS=Homo sapiens OX=9606 GN=OSBP PE=1 SV=1	Oxysterol-binding protein 1	OSBP	89.26	3290.29	-2.2	348	375	M3:Oxidation (M):151.14;S4:Phosphorylation (STY):166.52	S351	SGKGDMSDEDDEN	41111.9	87107.7
Q9NYF8	Q9NYF8|BCLF1_HUMAN	Y	LKDLFDY(+79.97)SPPLHK	7	13	Bcl-2-associated transcription factor 1 OS=Homo sapiens OX=9606 GN=BCLAF1 PE=1 SV=2	Bcl-2-associated transcription factor 1	BCLAF1	47.75	1651.8	-1.7	505	517	Y7:Phosphorylation (STY):0.00	Y511	LKDLFDYSPPLHK	170498	363126
Q05209	Q05209|PTN12_HUMAN	T	VSVT(+79.97)PPEESQNSDTPPRPDR	4	20	Tyrosine-protein phosphatase non-receptor type 12 OS=Homo sapiens OX=9606 GN=PTPN12 PE=1 SV=3	Tyrosine-protein phosphatase non-receptor type 12	PTPN12	43.61	2287.01	-3.2	506	525	T4:Phosphorylation (STY):29.24	T509	SNKVSVTPPEESQ	75307.1	160799
P25205	P25205|MCM3_HUMAN	S	DGDSYDPYDFS(+79.97)DTEEEMPQVHTPK	11	24	DNA replication licensing factor MCM3 OS=Homo sapiens OX=9606 GN=MCM3 PE=1 SV=3	DNA replication licensing factor MCM3	MCM3	80.36	2881.09	0.3	701	724	S11:Phosphorylation (STY):8.22	S711	YDPYDFSDTEEEM	49196.5	108013
P27816	P27816|MAP4_HUMAN	S	KKPC(+57.02)SETSQIEDTPSSKPTLLANGGHGVEGSDTTGS(+79.97)PTEFLEEK	36	44	Microtubule-associated protein 4 OS=Homo sapiens OX=9606 GN=MAP4 PE=1 SV=3	Microtubule-associated protein 4	MAP4	99.58	4725.16	-1.3	64	107	C4:Carbamidomethylation:1000.00;S36:Phosphorylation (STY):26.31	S99	GSDTTGSPTEFLE	76231.1	168111
Q13541	Q13541|4EBP1_HUMAN	T	T(+79.97)PPRDLPTIPGVTSPSSDEPPMEASQSHLR	1	30	Eukaryotic translation initiation factor 4E-binding protein 1 OS=Homo sapiens OX=9606 GN=EIF4EBP1 PE=1 SV=3	Eukaryotic translation initiation factor 4E-binding protein 1	EIF4EBP1	52.84	3278.53	-4.3	70	99	T1:Phosphorylation (STY):0.00	T70	NSPVTKTPPRDLP	45738.9	101310
Q96B36	Q96B36|AKTS1_HUMAN	S	TEARS(+79.97)S(+79.97)DEENGPPSS(+79.97)PDLDR	5	20	Proline-rich AKT1 substrate 1 OS=Homo sapiens OX=9606 GN=AKT1S1 PE=1 SV=1	Proline-rich AKT1 substrate 1	AKT1S1	66.71	2397.84	-0.9	198	217	S5:Phosphorylation (STY):5.55;S6:Phosphorylation (STY):12.35;S15:Phosphorylation (STY):14.02	S202	KRTEARSSDEENG	49413.6	109528
Q96B36	Q96B36|AKTS1_HUMAN	S	TEARS(+79.97)S(+79.97)DEENGPPSS(+79.97)PDLDR	6	20	Proline-rich AKT1 substrate 1 OS=Homo sapiens OX=9606 GN=AKT1S1 PE=1 SV=1	Proline-rich AKT1 substrate 1	AKT1S1	66.71	2397.84	-0.9	198	217	S5:Phosphorylation (STY):5.55;S6:Phosphorylation (STY):12.35;S15:Phosphorylation (STY):14.02	S203	RTEARSSDEENGP	49413.6	109528
Q96B36	Q96B36|AKTS1_HUMAN	S	TEARS(+79.97)S(+79.97)DEENGPPSS(+79.97)PDLDR	15	20	Proline-rich AKT1 substrate 1 OS=Homo sapiens OX=9606 GN=AKT1S1 PE=1 SV=1	Proline-rich AKT1 substrate 1	AKT1S1	66.71	2397.84	-0.9	198	217	S5:Phosphorylation (STY):5.55;S6:Phosphorylation (STY):12.35;S15:Phosphorylation (STY):14.02	S212	ENGPPSSPDLDRI	49413.6	109528
Q7Z4V5	Q7Z4V5|HDGR2_HUMAN	S	KAPSAS(+79.97)DS(+79.97)DSKADS(+79.97)DGAKPEPVAMAR	6	26	Hepatoma-derived growth factor-related protein 2 OS=Homo sapiens OX=9606 GN=HDGFL2 PE=1 SV=1	Hepatoma-derived growth factor-related protein 2	HDGFL2	69.81	2827.12	-1.1	227	252	S6:Phosphorylation (STY):26.31;S8:Phosphorylation (STY):11.10;S14:Phosphorylation (STY):16.51	S232	KKAPSASDSDSKA	74667.5	165545
Q7Z4V5	Q7Z4V5|HDGR2_HUMAN	S	KAPSAS(+79.97)DS(+79.97)DSKADS(+79.97)DGAKPEPVAMAR	8	26	Hepatoma-derived growth factor-related protein 2 OS=Homo sapiens OX=9606 GN=HDGFL2 PE=1 SV=1	Hepatoma-derived growth factor-related protein 2	HDGFL2	69.81	2827.12	-1.1	227	252	S6:Phosphorylation (STY):26.31;S8:Phosphorylation (STY):11.10;S14:Phosphorylation (STY):16.51	S234	APSASDSDSKADS	74667.5	165545
Q7Z4V5	Q7Z4V5|HDGR2_HUMAN	S	KAPSAS(+79.97)DS(+79.97)DSKADS(+79.97)DGAKPEPVAMAR	14	26	Hepatoma-derived growth factor-related protein 2 OS=Homo sapiens OX=9606 GN=HDGFL2 PE=1 SV=1	Hepatoma-derived growth factor-related protein 2	HDGFL2	69.81	2827.12	-1.1	227	252	S6:Phosphorylation (STY):26.31;S8:Phosphorylation (STY):11.10;S14:Phosphorylation (STY):16.51	S240	SDSKADSDGAKPE	74667.5	165545
P27708	P27708|PYR1_HUMAN	S	AS(+79.97)DPGLPAEEPK	2	12	CAD protein OS=Homo sapiens OX=9606 GN=CAD PE=1 SV=3	CAD protein	CAD	72.1	1289.55	1.3	1858	1869		S1859	PRIHRASDPGLPA	58887.5	131203
Q9UKM9	Q9UKM9|RALY_HUMAN	T	DDGDEEGLLT(+79.97)HS(+79.97)EEELEHSQDTDADDGALQ	10	30	RNA-binding protein Raly OS=Homo sapiens OX=9606 GN=RALY PE=1 SV=1	RNA-binding protein Raly	RALY	77.64	3429.26	2.2	277	306	T10:Phosphorylation (STY):13.05;S12:Phosphorylation (STY):15.08	T286	DEEGLLTHSEEEL	18138.7	40663.7
Q9UKM9	Q9UKM9|RALY_HUMAN	S	DDGDEEGLLT(+79.97)HS(+79.97)EEELEHSQDTDADDGALQ	12	30	RNA-binding protein Raly OS=Homo sapiens OX=9606 GN=RALY PE=1 SV=1	RNA-binding protein Raly	RALY	77.64	3429.26	2.2	277	306	T10:Phosphorylation (STY):13.05;S12:Phosphorylation (STY):15.08	S288	EGLLTHSEEELEH	18138.7	40663.7
Q9UKM9	Q9UKM9|RALY_HUMAN	S	DDGDEEGLLTHS(+79.97)EEELEHS(+79.97)QDTDADDGALQ	12	30	RNA-binding protein Raly OS=Homo sapiens OX=9606 GN=RALY PE=1 SV=1	RNA-binding protein Raly	RALY	69.86	3429.26	-0.2	277	306	S12:Phosphorylation (STY):6.59;S19:Phosphorylation (STY):5.08	S288	EGLLTHSEEELEH	18138.7	40663.7
Q9UKM9	Q9UKM9|RALY_HUMAN	S	DDGDEEGLLTHS(+79.97)EEELEHS(+79.97)QDTDADDGALQ	19	30	RNA-binding protein Raly OS=Homo sapiens OX=9606 GN=RALY PE=1 SV=1	RNA-binding protein Raly	RALY	69.86	3429.26	-0.2	277	306	S12:Phosphorylation (STY):6.59;S19:Phosphorylation (STY):5.08	S295	EEELEHSQDTDAD	18138.7	40663.7
Q13243	Q13243|SRSF5_HUMAN	S	S(+79.97)VS(+79.97)RS(+79.97)PVPEK	1	10	Serine/arginine-rich splicing factor 5 OS=Homo sapiens OX=9606 GN=SRSF5 PE=1 SV=1	Serine/arginine-rich splicing factor 5	SRSF5	42.2	1324.49	0.8	229	238		S229	SRSKSRSVSRSPV	258215	582843
Q13243	Q13243|SRSF5_HUMAN	S	S(+79.97)VS(+79.97)RS(+79.97)PVPEK	3	10	Serine/arginine-rich splicing factor 5 OS=Homo sapiens OX=9606 GN=SRSF5 PE=1 SV=1	Serine/arginine-rich splicing factor 5	SRSF5	42.2	1324.49	0.8	229	238		S231	SKSRSVSRSPVPE	258215	582843
Q13243	Q13243|SRSF5_HUMAN	S	S(+79.97)VS(+79.97)RS(+79.97)PVPEK	5	10	Serine/arginine-rich splicing factor 5 OS=Homo sapiens OX=9606 GN=SRSF5 PE=1 SV=1	Serine/arginine-rich splicing factor 5	SRSF5	42.2	1324.49	0.8	229	238		S233	SRSVSRSPVPEKS	258215	582843
P46821	P46821|MAP1B_HUMAN	S	VLS(+79.97)PLRS(+79.97)PPLIGSESAYESFLSADDK	3	26	Microtubule-associated protein 1B OS=Homo sapiens OX=9606 GN=MAP1B PE=1 SV=2	Microtubule-associated protein 1B	MAP1B	93.98	2937.34	1.1	1394	1419	S3:Phosphorylation (STY):116.35;S7:Phosphorylation (STY):90.32	S1396	PIEKVLSPLRSPP	169127	383668
P46821	P46821|MAP1B_HUMAN	S	VLS(+79.97)PLRS(+79.97)PPLIGSESAYESFLSADDK	7	26	Microtubule-associated protein 1B OS=Homo sapiens OX=9606 GN=MAP1B PE=1 SV=2	Microtubule-associated protein 1B	MAP1B	93.98	2937.34	1.1	1394	1419	S3:Phosphorylation (STY):116.35;S7:Phosphorylation (STY):90.32	S1400	VLSPLRSPPLIGS	169127	383668
Q96NE9	Q96NE9|FRMD6_HUMAN	S	HS(+79.97)LSLDDIR	2	9	FERM domain-containing protein 6 OS=Homo sapiens OX=9606 GN=FRMD6 PE=1 SV=1	FERM domain-containing protein 6	FRMD6	50.11	1134.51	-2.3	541	549	S2:Phosphorylation (STY):0.00	S542	TSTDRHSLSLDDI	33249.2	75584.2
Q96NE9	Q96NE9|FRMD6_HUMAN	S	HSLS(+79.97)LDDIR	4	9	FERM domain-containing protein 6 OS=Homo sapiens OX=9606 GN=FRMD6 PE=1 SV=1	FERM domain-containing protein 6	FRMD6	54.08	1134.51	-0.4	541	549	S4:Phosphorylation (STY):55.92	S544	TDRHSLSLDDIRL	33249.2	75584.2
P43307	P43307|SSRA_HUMAN	S	VEMGTSSQNDVDMSWIPQETLNQINKAS(+79.97)PR	28	30	Translocon-associated protein subunit alpha OS=Homo sapiens OX=9606 GN=SSR1 PE=1 SV=3	Translocon-associated protein subunit alpha	SSR1	73.31	3454.55	3.2	241	270	S28:Phosphorylation (STY):10.14	S268	NQINKASPRRLPR	16409.3	37747.3
Q9Y5J1	Q9Y5J1|UTP18_HUMAN	S	TSS(+79.97)DDES(+79.97)EEDEDDLLQR	3	17	U3 small nucleolar RNA-associated protein 18 homolog OS=Homo sapiens OX=9606 GN=UTP18 PE=1 SV=3	U3 small nucleolar RNA-associated protein 18 homolog	UTP18	88.46	2141.72	1	204	220	S3:Phosphorylation (STY):9.40;S7:Phosphorylation (STY):63.05	S206	TKRKTSSDDESEE	14603.6	33664.4
Q9Y5J1	Q9Y5J1|UTP18_HUMAN	S	TSS(+79.97)DDES(+79.97)EEDEDDLLQR	7	17	U3 small nucleolar RNA-associated protein 18 homolog OS=Homo sapiens OX=9606 GN=UTP18 PE=1 SV=3	U3 small nucleolar RNA-associated protein 18 homolog	UTP18	88.46	2141.72	1	204	220	S3:Phosphorylation (STY):9.40;S7:Phosphorylation (STY):63.05	S210	TSSDDESEEDEDD	14603.6	33664.4
Q8N3X1	Q8N3X1|FNBP4_HUMAN	S	ATGGLC(+57.02)LLGAYADS(+79.97)DDDDNDVSEK	14	24	Formin-binding protein 4 OS=Homo sapiens OX=9606 GN=FNBP4 PE=1 SV=3	Formin-binding protein 4	FNBP4	70.16	2580.02	-0.7	103	126	C6:Carbamidomethylation:1000.00;S14:Phosphorylation (STY):29.32	S116	LGAYADSDDDDND	17967.9	41494.9
Q9H1E3	Q9H1E3|NUCKS_HUMAN	S	DDSHSAEDS(+79.97)EDEKEDHK	9	17	Nuclear ubiquitous casein and cyclin-dependent kinase substrate 1 OS=Homo sapiens OX=9606 GN=NUCKS1 PE=1 SV=1	Nuclear ubiquitous casein and cyclin-dependent kinase substrate 1	NUCKS1	87.11	2051.72	-4.3	71	87	S9:Phosphorylation (STY):63.97	S79	SHSAEDSEDEKED	114931	267069
Q9UQN3	Q9UQN3|CHM2B_HUMAN	S	ATIS(+79.97)DEEIER	4	10	Charged multivesicular body protein 2b OS=Homo sapiens OX=9606 GN=CHMP2B PE=1 SV=1	Charged multivesicular body protein 2b	CHMP2B	57.79	1241.52	-2.9	196	205	S4:Phosphorylation (STY):39.76	S199	TSKATISDEEIER	33297.6	77655.9
Q96ST2	Q96ST2|IWS1_HUMAN	S	AAVLSDS(+79.97)EDEEK	7	12	Protein IWS1 homolog OS=Homo sapiens OX=9606 GN=IWS1 PE=1 SV=2	Protein IWS1 homolog	IWS1	66.71	1371.54	-0.4	394	405	S7:Phosphorylation (STY):55.92	S400	AAVLSDSEDEEKA	36216.1	84723.1
Q9H2J7	Q9H2J7|S6A15_HUMAN	S	IPSEMPS(+79.97)PNFGK	7	12	Sodium-dependent neutral amino acid transporter B(0)AT2 OS=Homo sapiens OX=9606 GN=SLC6A15 PE=1 SV=1	Sodium-dependent neutral amino acid transporter B(0)AT2	SLC6A15	60.94	1382.59	-3.4	681	692	S7:Phosphorylation (STY):99.35	S687	IPSEMPSPNFGKN	62747.5	148196
Q15121	Q15121|PEA15_HUMAN	S	QPS(+79.97)EEEIIK	3	9	Astrocytic phosphoprotein PEA-15 OS=Homo sapiens OX=9606 GN=PEA15 PE=1 SV=2	Astrocytic phosphoprotein PEA-15	PEA15	44.16	1151.51	-3.6	114	122		S116	DIIRQPSEEEIIK	47308.5	112192
P62070	P62070|RRAS2_HUMAN	S	FQEQEC(+57.02)PPS(+79.97)PEPTRK	9	15	Ras-related protein R-Ras2 OS=Homo sapiens OX=9606 GN=RRAS2 PE=1 SV=1	Ras-related protein R-Ras2	RRAS2	47.75	1908.81	0	178	192	C6:Carbamidomethylation:1000.00;S9:Phosphorylation (STY):42.68	S186	EQECPPSPEPTRK	38056	90806.9
P14625	P14625|ENPL_HUMAN	S	TETVEEPMEEEEAAKEEKEES(+79.97)DDEAAVEEEEEEK	21	34	Endoplasmin OS=Homo sapiens OX=9606 GN=HSP90B1 PE=1 SV=1	Endoplasmin	HSP90B1	64.81	4034.59	2.2	286	319	S21:Phosphorylation (STY):58.22	S306	KEEKEESDDEAAV	33201.7	79719.1
Q03001	Q03001|DYST_HUMAN	T	YYRDTYHPLDDWIQQVETT(+79.97)QR	19	21	Dystonin OS=Homo sapiens OX=9606 GN=DST PE=1 SV=4	Dystonin	DST	22.44	2806.24	5.7	1294	1314	T19:Phosphorylation (STY):12.28	T1312	IQQVETTQRKIQE	83350.6	203259
Q99733	Q99733|NP1L4_HUMAN	S	EFITGDVEPTDAES(+79.97)EWHSENEEEEK	14	25	Nucleosome assembly protein 1-like 4 OS=Homo sapiens OX=9606 GN=NAP1L4 PE=1 SV=1	Nucleosome assembly protein 1-like 4	NAP1L4	83.11	3015.18	-2.7	108	132	S14:Phosphorylation (STY):5.55	S121	EPTDAESEWHSEN	271938	688065
P18583	P18583|SON_HUMAN	S	EDDDVIVNKPHVS(+79.97)DEEEEEPPFYHHPFK	13	28	Protein SON OS=Homo sapiens OX=9606 GN=SON PE=1 SV=4	Protein SON	SON	103.55	3456.48	-1.7	2117	2144	S13:Phosphorylation (STY):94.89	S2129	VNKPHVSDEEEEE	118946	308386
Q9NQ92	Q9NQ92|COPRS_HUMAN	T	GEGT(+79.97)HSEEEGFAMDEEDS(+79.97)DGELNTWELSEGTNC(+57.02)PPK	4	36	Coordinator of PRMT5 and differentiation stimulator OS=Homo sapiens OX=9606 GN=COPRS PE=1 SV=3	Coordinator of PRMT5 and differentiation stimulator	COPRS	48.31	4142.52	1.6	70	105	T4:Phosphorylation (STY):0.00;S18:Phosphorylation (STY):9.45;C33:Carbamidomethylation:1000.00	T73	PARGEGTHSEEEG	14459.3	37544.8
Q9NQ92	Q9NQ92|COPRS_HUMAN	S	GEGT(+79.97)HSEEEGFAMDEEDS(+79.97)DGELNTWELSEGTNC(+57.02)PPK	18	36	Coordinator of PRMT5 and differentiation stimulator OS=Homo sapiens OX=9606 GN=COPRS PE=1 SV=3	Coordinator of PRMT5 and differentiation stimulator	COPRS	48.31	4142.52	1.6	70	105	T4:Phosphorylation (STY):0.00;S18:Phosphorylation (STY):9.45;C33:Carbamidomethylation:1000.00	S87	AMDEEDSDGELNT	14459.3	37544.8
Q9UQ35	Q9UQ35|SRRM2_HUMAN	S	ELS(+79.97)NSPLR	3	8	Serine/arginine repetitive matrix protein 2 OS=Homo sapiens OX=9606 GN=SRRM2 PE=1 SV=2	Serine/arginine repetitive matrix protein 2	SRRM2	40.38	994.448	-1.2	1316	1323	S3:Phosphorylation (STY):0.00	S1318	PEHKELSNSPLRE	43712.9	113930
Q9Y6D5	Q9Y6D5|BIG2_HUMAN	S	ELEKPIQS(+79.97)KPQSPVIQAAAVS(+79.97)PK	8	23	Brefeldin A-inhibited guanine nucleotide-exchange protein 2 OS=Homo sapiens OX=9606 GN=ARFGEF2 PE=1 SV=3	Brefeldin A-inhibited guanine nucleotide-exchange protein 2	ARFGEF2	40.44	2604.3	-2.6	207	229	S8:Phosphorylation (STY):4.73;S21:Phosphorylation (STY):10.47	S214	LEKPIQSKPQSPV	13591.8	35688.4
Q9Y6D5	Q9Y6D5|BIG2_HUMAN	S	ELEKPIQS(+79.97)KPQSPVIQAAAVS(+79.97)PK	21	23	Brefeldin A-inhibited guanine nucleotide-exchange protein 2 OS=Homo sapiens OX=9606 GN=ARFGEF2 PE=1 SV=3	Brefeldin A-inhibited guanine nucleotide-exchange protein 2	ARFGEF2	40.44	2604.3	-2.6	207	229	S8:Phosphorylation (STY):4.73;S21:Phosphorylation (STY):10.47	S227	IQAAAVSPKFVRL	13591.8	35688.4
Q12789	Q12789|TF3C1_HUMAN	S	DSLLDTSSVSEPNVSFVSHC(+57.02)ADSNS(+79.97)GDIAVIEEVR	25	35	General transcription factor 3C polypeptide 1 OS=Homo sapiens OX=9606 GN=GTF3C1 PE=1 SV=4	General transcription factor 3C polypeptide 1	GTF3C1	21.33	3814.69	-4.8	551	585	C20:Carbamidomethylation:1000.00;S25:Phosphorylation (STY):0.00	S575	HCADSNSGDIAVI	49.1331	129.73
Q92734	Q92734|TFG_HUMAN	S	NVM(+15.99)SAFGLTDDQVSGPPS(+79.97)APAEDR	18	24	Protein TFG OS=Homo sapiens OX=9606 GN=TFG PE=1 SV=2	Protein TFG	TFG	22.59	2556.08	4.8	180	203	M3:Oxidation (M):1000.00;S18:Phosphorylation (STY):11.12	S197	QVSGPPSAPAEDR	35.7832	95.298
Q6P2E9	Q6P2E9|EDC4_HUMAN	S	TRS(+79.97)PDVISSASTALSQDIPEIASEALSR	3	28	Enhancer of mRNA-decapping protein 4 OS=Homo sapiens OX=9606 GN=EDC4 PE=1 SV=1	Enhancer of mRNA-decapping protein 4	EDC4	86.85	2980.44	-0.6	727	754	S3:Phosphorylation (STY):0.00	S729	SPSRTRSPDVISS	130431	348393
Q12802	Q12802|AKP13_HUMAN	S	SGS(+79.97)LDSELSVSPK	3	13	A-kinase anchor protein 13 OS=Homo sapiens OX=9606 GN=AKAP13 PE=1 SV=2	A-kinase anchor protein 13	AKAP13	55.87	1384.61	-1.5	2718	2730	S3:Phosphorylation (STY):0.00	S2720	SIAKSGSLDSELS	46.5982	124.577
Q9UQ35	Q9UQ35|SRRM2_HUMAN	S	S(+79.97)SRS(+79.97)S(+79.97)PELTR	1	10	Serine/arginine repetitive matrix protein 2 OS=Homo sapiens OX=9606 GN=SRRM2 PE=1 SV=2	Serine/arginine repetitive matrix protein 2	SRRM2	38.06	1358.47	0	1690	1699	S1:Phosphorylation (STY):0.00;S4:Phosphorylation (STY):11.10;S5:Phosphorylation (STY):22.45	S1690	TPPRRRSSRSSPE	13788.9	36913.9
Q9UQ35	Q9UQ35|SRRM2_HUMAN	S	S(+79.97)SRS(+79.97)S(+79.97)PELTR	4	10	Serine/arginine repetitive matrix protein 2 OS=Homo sapiens OX=9606 GN=SRRM2 PE=1 SV=2	Serine/arginine repetitive matrix protein 2	SRRM2	38.06	1358.47	0	1690	1699	S1:Phosphorylation (STY):0.00;S4:Phosphorylation (STY):11.10;S5:Phosphorylation (STY):22.45	S1693	RRRSSRSSPELTR	13788.9	36913.9
Q9UQ35	Q9UQ35|SRRM2_HUMAN	S	S(+79.97)SRS(+79.97)S(+79.97)PELTR	5	10	Serine/arginine repetitive matrix protein 2 OS=Homo sapiens OX=9606 GN=SRRM2 PE=1 SV=2	Serine/arginine repetitive matrix protein 2	SRRM2	38.06	1358.47	0	1690	1699	S1:Phosphorylation (STY):0.00;S4:Phosphorylation (STY):11.10;S5:Phosphorylation (STY):22.45	S1694	RRSSRSSPELTRK	13788.9	36913.9
Q9UQ35	Q9UQ35|SRRM2_HUMAN	S	SS(+79.97)RS(+79.97)S(+79.97)PELTR	2	10	Serine/arginine repetitive matrix protein 2 OS=Homo sapiens OX=9606 GN=SRRM2 PE=1 SV=2	Serine/arginine repetitive matrix protein 2	SRRM2	30.9	1358.47	-0.4	1690	1699	S2:Phosphorylation (STY):0.00;S4:Phosphorylation (STY):14.84;S5:Phosphorylation (STY):22.37	S1691	PPRRRSSRSSPEL	13788.9	36913.9
Q9UQ35	Q9UQ35|SRRM2_HUMAN	S	SS(+79.97)RS(+79.97)S(+79.97)PELTR	4	10	Serine/arginine repetitive matrix protein 2 OS=Homo sapiens OX=9606 GN=SRRM2 PE=1 SV=2	Serine/arginine repetitive matrix protein 2	SRRM2	30.9	1358.47	-0.4	1690	1699	S2:Phosphorylation (STY):0.00;S4:Phosphorylation (STY):14.84;S5:Phosphorylation (STY):22.37	S1693	RRRSSRSSPELTR	13788.9	36913.9
Q9UQ35	Q9UQ35|SRRM2_HUMAN	S	SS(+79.97)RS(+79.97)S(+79.97)PELTR	5	10	Serine/arginine repetitive matrix protein 2 OS=Homo sapiens OX=9606 GN=SRRM2 PE=1 SV=2	Serine/arginine repetitive matrix protein 2	SRRM2	30.9	1358.47	-0.4	1690	1699	S2:Phosphorylation (STY):0.00;S4:Phosphorylation (STY):14.84;S5:Phosphorylation (STY):22.37	S1694	RRSSRSSPELTRK	13788.9	36913.9
Q15149	Q15149|PLEC_HUMAN	S	SDEGQLS(+79.97)PATR	7	11	Plectin OS=Homo sapiens OX=9606 GN=PLEC PE=1 SV=3	Plectin	PLEC	68.23	1239.51	-1.6	714	724	S7:Phosphorylation (STY):43.31	S720	SDEGQLSPATRGA	68762.3	184654
Q7Z4V5	Q7Z4V5|HDGR2_HUMAN	S	GPPS(+79.97)S(+79.97)SDSEPEAELER	4	16	Hepatoma-derived growth factor-related protein 2 OS=Homo sapiens OX=9606 GN=HDGFL2 PE=1 SV=1	Hepatoma-derived growth factor-related protein 2	HDGFL2	51.09	1845.67	-0.2	392	407	S4:Phosphorylation (STY):0.00;S5:Phosphorylation (STY):0.00	S395	RGRGPPSSSDSEP	15167.2	41174.7
Q7Z4V5	Q7Z4V5|HDGR2_HUMAN	S	GPPS(+79.97)S(+79.97)SDSEPEAELER	5	16	Hepatoma-derived growth factor-related protein 2 OS=Homo sapiens OX=9606 GN=HDGFL2 PE=1 SV=1	Hepatoma-derived growth factor-related protein 2	HDGFL2	51.09	1845.67	-0.2	392	407	S4:Phosphorylation (STY):0.00;S5:Phosphorylation (STY):0.00	S396	GRGPPSSSDSEPE	15167.2	41174.7
Q9BQQ3	Q9BQQ3|GORS1_HUMAN	T	KPPGT(+79.97)PPPSALPLGAPPPDALPPGPTPEDS(+79.97)PSLETGSR	5	38	Golgi reassembly-stacking protein 1 OS=Homo sapiens OX=9606 GN=GORASP1 PE=1 SV=3	Golgi reassembly-stacking protein 1	GORASP1	61.2	3853.82	3.5	212	249	T5:Phosphorylation (STY):8.26;S30:Phosphorylation (STY):11.10	T216	HKKPPGTPPPSAL	7496.66	20398.5
Q9BQQ3	Q9BQQ3|GORS1_HUMAN	S	KPPGT(+79.97)PPPSALPLGAPPPDALPPGPTPEDS(+79.97)PSLETGSR	30	38	Golgi reassembly-stacking protein 1 OS=Homo sapiens OX=9606 GN=GORASP1 PE=1 SV=3	Golgi reassembly-stacking protein 1	GORASP1	61.2	3853.82	3.5	212	249	T5:Phosphorylation (STY):8.26;S30:Phosphorylation (STY):11.10	S241	GPTPEDSPSLETG	7496.66	20398.5
P61978	P61978|HNRPK_HUMAN	S	DYDDMS(+79.97)PR	6	8	Heterogeneous nuclear ribonucleoprotein K OS=Homo sapiens OX=9606 GN=HNRNPK PE=1 SV=1	Heterogeneous nuclear ribonucleoprotein K	HNRNPK	53.21	1077.35	-3.3	279	286	S6:Phosphorylation (STY):91.04	S284	RDYDDMSPRRGPP	14522.6	39837
B5ME19	B5ME19|EIFCL_HUMAN:Q99613|EIF3C_HUMAN	S	FFTTGS(+79.97)DSESESS(+79.97)LS(+79.97)GEELVTKPVGGNYGK	6	30	Eukaryotic translation initiation factor 3 subunit C-like protein OS=Homo sapiens OX=9606 GN=EIF3CL PE=1 SV=1	Eukaryotic translation initiation factor 3 subunit C-like protein	EIF3CL	53.2	3348.34	-0.2	4	33	S6:Phosphorylation (STY):14.04;S13:Phosphorylation (STY):10.11;S15:Phosphorylation (STY):9.45	S9	RFFTTGSDSESES	7659.13	21196.9
B5ME19	B5ME19|EIFCL_HUMAN:Q99613|EIF3C_HUMAN	S	FFTTGS(+79.97)DSESESS(+79.97)LS(+79.97)GEELVTKPVGGNYGK	13	30	Eukaryotic translation initiation factor 3 subunit C-like protein OS=Homo sapiens OX=9606 GN=EIF3CL PE=1 SV=1	Eukaryotic translation initiation factor 3 subunit C-like protein	EIF3CL	53.2	3348.34	-0.2	4	33	S6:Phosphorylation (STY):14.04;S13:Phosphorylation (STY):10.11;S15:Phosphorylation (STY):9.45	S16	DSESESSLSGEEL	7659.13	21196.9
B5ME19	B5ME19|EIFCL_HUMAN:Q99613|EIF3C_HUMAN	S	FFTTGS(+79.97)DSESESS(+79.97)LS(+79.97)GEELVTKPVGGNYGK	15	30	Eukaryotic translation initiation factor 3 subunit C-like protein OS=Homo sapiens OX=9606 GN=EIF3CL PE=1 SV=1	Eukaryotic translation initiation factor 3 subunit C-like protein	EIF3CL	53.2	3348.34	-0.2	4	33	S6:Phosphorylation (STY):14.04;S13:Phosphorylation (STY):10.11;S15:Phosphorylation (STY):9.45	S18	ESESSLSGEELVT	7659.13	21196.9
Q7Z6B7	Q7Z6B7|SRGP1_HUMAN	S	NSPTPATSTES(+79.97)LSPLHNVALR	11	21	SLIT-ROBO Rho GTPase-activating protein 1 OS=Homo sapiens OX=9606 GN=SRGAP1 PE=1 SV=1	SLIT-ROBO Rho GTPase-activating protein 1	SRGAP1	35.77	2271.09	-14.4	998	1018	S11:Phosphorylation (STY):0.00	S1008	PATSTESLSPLHN	49.3192	136.652
O00488	O00488|ZN593_HUMAN	S	LAVPTEVSTEVPEMDTS(+79.97)T	17	18	Zinc finger protein 593 OS=Homo sapiens OX=9606 GN=ZNF593 PE=1 SV=2	Zinc finger protein 593	ZNF593	59.36	1984.86	1	117	134	S17:Phosphorylation (STY):0.00	S133	VPEMDTST_____	9524.79	26458.7
O00488	O00488|ZN593_HUMAN	T	LAVPTEVSTEVPEMDTST(+79.97)	18	18	Zinc finger protein 593 OS=Homo sapiens OX=9606 GN=ZNF593 PE=1 SV=2	Zinc finger protein 593	ZNF593	60.81	1984.86	4.1	117	134	T18:Phosphorylation (STY):0.00	T134	PEMDTST______	9524.79	26458.7
Q96G23	Q96G23|CERS2_HUMAN	S	LVEDERS(+79.97)DREET(+79.97)ES(+79.97)S(+79.97)EGEEAAAGGGAK	7	27	Ceramide synthase 2 OS=Homo sapiens OX=9606 GN=CERS2 PE=1 SV=1	Ceramide synthase 2	CERS2	70.75	3127.1	0.3	335	361		S341	LVEDERSDREETE	7793.9	21659.7
Q96G23	Q96G23|CERS2_HUMAN	T	LVEDERS(+79.97)DREET(+79.97)ES(+79.97)S(+79.97)EGEEAAAGGGAK	12	27	Ceramide synthase 2 OS=Homo sapiens OX=9606 GN=CERS2 PE=1 SV=1	Ceramide synthase 2	CERS2	70.75	3127.1	0.3	335	361		T346	RSDREETESSEGE	7793.9	21659.7
Q96G23	Q96G23|CERS2_HUMAN	S	LVEDERS(+79.97)DREET(+79.97)ES(+79.97)S(+79.97)EGEEAAAGGGAK	14	27	Ceramide synthase 2 OS=Homo sapiens OX=9606 GN=CERS2 PE=1 SV=1	Ceramide synthase 2	CERS2	70.75	3127.1	0.3	335	361		S348	DREETESSEGEEA	7793.9	21659.7
Q96G23	Q96G23|CERS2_HUMAN	S	LVEDERS(+79.97)DREET(+79.97)ES(+79.97)S(+79.97)EGEEAAAGGGAK	15	27	Ceramide synthase 2 OS=Homo sapiens OX=9606 GN=CERS2 PE=1 SV=1	Ceramide synthase 2	CERS2	70.75	3127.1	0.3	335	361		S349	REETESSEGEEAA	7793.9	21659.7
Q13428	Q13428|TCOF_HUMAN	S	S(+79.97)SSSESEDEDVIPATQC(+57.02)LTPGIR	1	23	Treacle protein OS=Homo sapiens OX=9606 GN=TCOF1 PE=1 SV=3	Treacle protein	TCOF1	72.34	2557.09	-1.2	996	1018	S1:Phosphorylation (STY):0.00;C17:Carbamidomethylation:1000.00	S996	SESTARSSSSESE	13285.5	37112.4
Q32MZ4	Q32MZ4|LRRF1_HUMAN	S	TEVPGS(+79.97)PAGTEGNC(+57.02)QEATGPSTVDTQNEPLDMKEPDEEK	6	39	Leucine-rich repeat flightless-interacting protein 1 OS=Homo sapiens OX=9606 GN=LRRFIP1 PE=1 SV=2	Leucine-rich repeat flightless-interacting protein 1	LRRFIP1	37.86	4223.77	4.3	516	554	S6:Phosphorylation (STY):11.12;C14:Carbamidomethylation:1000.00	S521	KTEVPGSPAGTEG	5918.35	16620.5
Q7Z4V5	Q7Z4V5|HDGR2_HUMAN	S	GPPS(+79.97)SSDS(+79.97)EPEAELER	4	16	Hepatoma-derived growth factor-related protein 2 OS=Homo sapiens OX=9606 GN=HDGFL2 PE=1 SV=1	Hepatoma-derived growth factor-related protein 2	HDGFL2	58.19	1845.67	1.5	392	407	S4:Phosphorylation (STY):0.00;S8:Phosphorylation (STY):22.45	S395	RGRGPPSSSDSEP	14641.4	41174.7
Q7Z4V5	Q7Z4V5|HDGR2_HUMAN	S	GPPS(+79.97)SSDS(+79.97)EPEAELER	8	16	Hepatoma-derived growth factor-related protein 2 OS=Homo sapiens OX=9606 GN=HDGFL2 PE=1 SV=1	Hepatoma-derived growth factor-related protein 2	HDGFL2	58.19	1845.67	1.5	392	407	S4:Phosphorylation (STY):0.00;S8:Phosphorylation (STY):22.45	S399	PPSSSDSEPEAEL	14641.4	41174.7
Q14676	Q14676|MDC1_HUMAN	T	AQPFGFIDSDT(+79.97)DAEEERIPATPVVIPMK	11	28	Mediator of DNA damage checkpoint protein 1 OS=Homo sapiens OX=9606 GN=MDC1 PE=1 SV=3	Mediator of DNA damage checkpoint protein 1	MDC1	63.07	3152.48	1.2	321	348	T11:Phosphorylation (STY):0.00	T331	GFIDSDTDAEEER	39230.4	110596
P17174	P17174|AATC_HUMAN	T	NTPVYVSSPT(+79.97)WENHNAVFSAAGFK	10	24	Aspartate aminotransferase, cytoplasmic OS=Homo sapiens OX=9606 GN=GOT1 PE=1 SV=3	Aspartate aminotransferase, cytoplasmic	GOT1	30.18	2702.22	-8.3	131	154	T10:Phosphorylation (STY):0.00	T140	VYVSSPTWENHNA	48.8367	138.022
Q70E73	Q70E73|RAPH1_HUMAN	S	QIASQFPPPPTPPAMESQPLKPVPANVAPQS(+79.97)PPAVK	31	36	Ras-associated and pleckstrin homology domains-containing protein 1 OS=Homo sapiens OX=9606 GN=RAPH1 PE=1 SV=3	Ras-associated and pleckstrin homology domains-containing protein 1	RAPH1	53.81	3792.93	3.1	864	899	S31:Phosphorylation (STY):10.88	S894	ANVAPQSPPAVKA	27422.6	77598.9
P78362	P78362|SRPK2_HUMAN	S	IIEENITSAAPS(+79.97)NDQDGEYC(+57.02)PEVK	12	24	SRSF protein kinase 2 OS=Homo sapiens OX=9606 GN=SRPK2 PE=1 SV=3	SRSF protein kinase 2	SRPK2	42.25	2758.17	-1.4	301	324	S12:Phosphorylation (STY):10.19;C20:Carbamidomethylation:1000.00	S312	ITSAAPSNDQDGE	45.9662	130.711
P48681	P48681|NEST_HUMAN	S	DGESDGFADEEES(+79.97)GEEGEEDQEEGREPGAGR	13	31	Nestin OS=Homo sapiens OX=9606 GN=NES PE=1 SV=2	Nestin	NES	92.84	3377.22	0.3	1406	1436	S13:Phosphorylation (STY):161.68	S1418	FADEEESGEEGEE	14842.1	42326.8
Q14241	Q14241|ELOA1_HUMAN	S	SYS(+79.97)PDHR	3	7	Elongin-A OS=Homo sapiens OX=9606 GN=ELOA PE=1 SV=2	Elongin-A	ELOA	49.48	940.344	-2.6	149	155	S3:Phosphorylation (STY):0.00	S151	TGSRSYSPDHRQK	34638.5	99401.9
Q14966	Q14966|ZN638_HUMAN	S	S(+79.97)RS(+79.97)PMHYMYRPR	1	12	Zinc finger protein 638 OS=Homo sapiens OX=9606 GN=ZNF638 PE=1 SV=2	Zinc finger protein 638	ZNF638	40.01	1739.68	-2.3	508	519	S1:Phosphorylation (STY):15.01;S3:Phosphorylation (STY):20.17	S508	SHRFRRSRSPMHY	12111.3	34812.1
Q14966	Q14966|ZN638_HUMAN	S	S(+79.97)RS(+79.97)PMHYMYRPR	3	12	Zinc finger protein 638 OS=Homo sapiens OX=9606 GN=ZNF638 PE=1 SV=2	Zinc finger protein 638	ZNF638	40.01	1739.68	-2.3	508	519	S1:Phosphorylation (STY):15.01;S3:Phosphorylation (STY):20.17	S510	RFRRSRSPMHYMY	12111.3	34812.1
Q9UKV3	Q9UKV3|ACINU_HUMAN	S	SLIPDIKPLAGQEAVVDLHADDS(+79.97)RISEDETER	23	32	Apoptotic chromatin condensation inducer in the nucleus OS=Homo sapiens OX=9606 GN=ACIN1 PE=1 SV=2	Apoptotic chromatin condensation inducer in the nucleus	ACIN1	81.31	3597.72	-0.5	873	904	S23:Phosphorylation (STY):0.00	S895	DLHADDSRISEDE	5725.58	16601.4
P25205	P25205|MCM3_HUMAN	T	DGDSYDPYDFSDT(+79.97)EEEMPQVHTPK	13	24	DNA replication licensing factor MCM3 OS=Homo sapiens OX=9606 GN=MCM3 PE=1 SV=3	DNA replication licensing factor MCM3	MCM3	67.55	2881.09	2.7	701	724	T13:Phosphorylation (STY):4.64	T713	PYDFSDTEEEMPQ	37154.6	108013
Q6WCQ1	Q6WCQ1|MPRIP_HUMAN	T	AEEQQLPPPLSPPSPST(+79.97)PNHR	17	21	Myosin phosphatase Rho-interacting protein OS=Homo sapiens OX=9606 GN=MPRIP PE=1 SV=3	Myosin phosphatase Rho-interacting protein	MPRIP	50.92	2358.1	-4.5	279	299	T17:Phosphorylation (STY):0.00	T295	SPPSPSTPNHRRS	19838.4	57882.8
Q52LW3	Q52LW3|RHG29_HUMAN	T	T(+79.97)PSSGTMSSADDLDER	1	16	Rho GTPase-activating protein 29 OS=Homo sapiens OX=9606 GN=ARHGAP29 PE=1 SV=2	Rho GTPase-activating protein 29	ARHGAP29	53.97	1747.66	2.3	570	585	T1:Phosphorylation (STY):0.00	T570	HRKLPRTPSSGTM	37.304	108.995
Q92503	Q92503|S14L1_HUMAN	T	EGLSGDALSSPSAPEPVVGT(+79.97)PDDKLDADYIK	20	31	SEC14-like protein 1 OS=Homo sapiens OX=9606 GN=SEC14L1 PE=1 SV=2	SEC14-like protein 1	SEC14L1	47.52	3222.49	-3	215	245	T20:Phosphorylation (STY):0.00	T234	PEPVVGTPDDKLD	5424.63	15899.1
P45973	P45973|CBX5_HUMAN	T	T(+79.97)ADS(+79.97)SSSEDEEEYVVEK	1	17	Chromobox protein homolog 5 OS=Homo sapiens OX=9606 GN=CBX5 PE=1 SV=1	Chromobox protein homolog 5	CBX5	60	2062.72	-0.1	8	24	T1:Phosphorylation (STY):0.00;S4:Phosphorylation (STY):0.00	T8	GKKTKRTADSSSS	7374.03	21703.2
P45973	P45973|CBX5_HUMAN	S	T(+79.97)ADS(+79.97)SSSEDEEEYVVEK	4	17	Chromobox protein homolog 5 OS=Homo sapiens OX=9606 GN=CBX5 PE=1 SV=1	Chromobox protein homolog 5	CBX5	60	2062.72	-0.1	8	24	T1:Phosphorylation (STY):0.00;S4:Phosphorylation (STY):0.00	S11	TKRTADSSSSEDE	7374.03	21703.2
P28290	P28290|ITPI2_HUMAN	S	ES(+79.97)SSMLATVK	2	10	Protein ITPRID2 OS=Homo sapiens OX=9606 GN=ITPRID2 PE=1 SV=3	Protein ITPRID2	ITPRID2	45.56	1131.49	-1.3	351	360	S2:Phosphorylation (STY):17.01	S352	IMKKKESSSMLAT	41.7443	122.977
P23588	P23588|IF4B_HUMAN	T	SLENET(+79.97)LNKEEDC(+57.02)HSPTSKPPKPDQPLK	6	28	Eukaryotic translation initiation factor 4B OS=Homo sapiens OX=9606 GN=EIF4B PE=1 SV=2	Eukaryotic translation initiation factor 4B	EIF4B	58.59	3297.52	-0.6	445	472	T6:Phosphorylation (STY):0.00;C13:Carbamidomethylation:1000.00	T450	KSLENETLNKEED	113784	339595
Q8WVC0	Q8WVC0|LEO1_HUMAN	S	NAIASDSEADS(+79.97)DTEVPK	11	17	RNA polymerase-associated protein LEO1 OS=Homo sapiens OX=9606 GN=LEO1 PE=1 SV=1	RNA polymerase-associated protein LEO1	LEO1	78.15	1827.74	1.6	290	306	S11:Phosphorylation (STY):39.76	S300	SDSEADSDTEVPK	8451.3	25292.8
Q99590	Q99590|SCAFB_HUMAN	S	RPQS(+79.97)PS(+79.97)PR	4	8	Protein SCAF11 OS=Homo sapiens OX=9606 GN=SCAF11 PE=1 SV=2	Protein SCAF11	SCAF11	45.97	1083.43	1.2	813	820		S816	EKKRPQSPSPRRE	12307.3	36850.2
Q99590	Q99590|SCAFB_HUMAN	S	RPQS(+79.97)PS(+79.97)PR	6	8	Protein SCAF11 OS=Homo sapiens OX=9606 GN=SCAF11 PE=1 SV=2	Protein SCAF11	SCAF11	45.97	1083.43	1.2	813	820		S818	KRPQSPSPRRETG	12307.3	36850.2
P19338	P19338|NUCL_HUMAN	S	KEDSDEEEDDDS(+79.97)EEDEEDDEDEDEDEDEIEPAAM(+15.99)K	12	35	Nucleolin OS=Homo sapiens OX=9606 GN=NCL PE=1 SV=3	Nucleolin	NCL	69.21	4214.4	1.7	142	176	S12:Phosphorylation (STY):19.48;M34:Oxidation (M):1000.00	S153	EEEDDDSEEDEED	12760.8	38342.1
Q96JG6	Q96JG6|VPS50_HUMAN	S	SAYQEYDS(+79.97)DS(+79.97)DVPEELKR	8	18	Syndetin OS=Homo sapiens OX=9606 GN=VPS50 PE=1 SV=3	Syndetin	VPS50	54.57	2289.87	-4.3	552	569	S8:Phosphorylation (STY):8.22;S10:Phosphorylation (STY):14.19	S559	AYQEYDSDSDVPE	39636.3	119517
Q96JG6	Q96JG6|VPS50_HUMAN	S	SAYQEYDS(+79.97)DS(+79.97)DVPEELKR	10	18	Syndetin OS=Homo sapiens OX=9606 GN=VPS50 PE=1 SV=3	Syndetin	VPS50	54.57	2289.87	-4.3	552	569	S8:Phosphorylation (STY):8.22;S10:Phosphorylation (STY):14.19	S561	QEYDSDSDVPEEL	39636.3	119517
P43487	P43487|RANG_HUMAN	T	DTHEDHDTSTENT(+79.97)DESNHDPQFEPIVSLPEQEIK	13	34	Ran-specific GTPase-activating protein OS=Homo sapiens OX=9606 GN=RANBP1 PE=1 SV=1	Ran-specific GTPase-activating protein	RANBP1	110.35	4012.68	-6	6	39	T13:Phosphorylation (STY):0.00	T18	DTSTENTDESNHD	12679.2	38253
Q14839	Q14839|CHD4_HUMAN	T	T(+79.97)PTPSTPGDTQPNTPAPVPPAEDGIK	1	26	Chromodomain-helicase-DNA-binding protein 4 OS=Homo sapiens OX=9606 GN=CHD4 PE=1 SV=2	Chromodomain-helicase-DNA-binding protein 4	CHD4	62.25	2664.23	-4.1	1540	1565	T1:Phosphorylation (STY):5.47	T1540	GSPSPKTPTPSTP	15288.9	46131.6
Q96TC7	Q96TC7|RMD3_HUMAN	S	KDS(+79.97)LDLEEEAASGASSALEAGGSSGLEDVLPLLQQADELHR	3	41	Regulator of microtubule dynamics protein 3 OS=Homo sapiens OX=9606 GN=RMDN3 PE=1 SV=2	Regulator of microtubule dynamics protein 3	RMDN3	107.56	4287.01	-2.2	210	250	S3:Phosphorylation (STY):20.40	S212	KMGRKDSLDLEEE	32087.6	97293.5
Q15149	Q15149|PLEC_HUMAN	S	SS(+79.97)SVGSSSSYPISPAVSR	2	18	Plectin OS=Homo sapiens OX=9606 GN=PLEC PE=1 SV=3	Plectin	PLEC	77.95	1833.81	-4.9	4384	4401	S2:Phosphorylation (STY):0.00	S4385	GFRSRSSSVGSSS	566190	1.71734e+06
Q9Y4E8	Q9Y4E8|UBP15_HUMAN	S	GASAATGIPLESDEDS(+79.97)NDNDNDIENENC(+57.02)MHTN	16	32	Ubiquitin carboxyl-terminal hydrolase 15 OS=Homo sapiens OX=9606 GN=USP15 PE=1 SV=3	Ubiquitin carboxyl-terminal hydrolase 15	USP15	83.73	3528.32	-0.8	950	981	S16:Phosphorylation (STY):5.55;C28:Carbamidomethylation:1000.00	S965	LESDEDSNDNDND	7209.83	21892
Q9UKM9	Q9UKM9|RALY_HUMAN	T	TRDDGDEEGLLT(+79.97)HSEEELEHS(+79.97)QDT(+79.97)DADDGALQ	12	32	RNA-binding protein Raly OS=Homo sapiens OX=9606 GN=RALY PE=1 SV=1	RNA-binding protein Raly	RALY	80.23	3766.37	3.2	275	306	T12:Phosphorylation (STY):0.00;S21:Phosphorylation (STY):52.22;T24:Phosphorylation (STY):59.20	T286	DEEGLLTHSEEEL	48430.9	147345
Q9UKM9	Q9UKM9|RALY_HUMAN	S	TRDDGDEEGLLT(+79.97)HSEEELEHS(+79.97)QDT(+79.97)DADDGALQ	21	32	RNA-binding protein Raly OS=Homo sapiens OX=9606 GN=RALY PE=1 SV=1	RNA-binding protein Raly	RALY	80.23	3766.37	3.2	275	306	T12:Phosphorylation (STY):0.00;S21:Phosphorylation (STY):52.22;T24:Phosphorylation (STY):59.20	S295	EEELEHSQDTDAD	48430.9	147345
Q9UKM9	Q9UKM9|RALY_HUMAN	T	TRDDGDEEGLLT(+79.97)HSEEELEHS(+79.97)QDT(+79.97)DADDGALQ	24	32	RNA-binding protein Raly OS=Homo sapiens OX=9606 GN=RALY PE=1 SV=1	RNA-binding protein Raly	RALY	80.23	3766.37	3.2	275	306	T12:Phosphorylation (STY):0.00;S21:Phosphorylation (STY):52.22;T24:Phosphorylation (STY):59.20	T298	LEHSQDTDADDGA	48430.9	147345
Q9H4M7	Q9H4M7|PKHA4_HUMAN	S	SSLSLASSASTISSLSSLS(+79.97)PK	19	21	Pleckstrin homology domain-containing family A member 4 OS=Homo sapiens OX=9606 GN=PLEKHA4 PE=1 SV=2	Pleckstrin homology domain-containing family A member 4	PLEKHA4	60.92	2089.02	3.4	8	28	S19:Phosphorylation (STY):8.22	S26	SSLSSLSPKKPTR	41.7978	128.127
Q96PY0	Q96PY0|K1908_HUMAN	S	SWILS(+79.97)PS(+79.97)SMS(+79.97)EPR	5	13	Putative uncharacterized protein PSMG3-AS1 OS=Homo sapiens OX=9606 GN=PSMG3-AS1 PE=5 SV=2	Putative uncharacterized protein PSMG3-AS1	PSMG3-AS1	20.12	1715.61	-11.1	126	138	S5:Phosphorylation (STY):22.45;S7:Phosphorylation (STY):0.00;S10:Phosphorylation (STY):0.00	S130	GKSWILSPSSMSE	2536.54	7791.71
Q96PY0	Q96PY0|K1908_HUMAN	S	SWILS(+79.97)PS(+79.97)SMS(+79.97)EPR	7	13	Putative uncharacterized protein PSMG3-AS1 OS=Homo sapiens OX=9606 GN=PSMG3-AS1 PE=5 SV=2	Putative uncharacterized protein PSMG3-AS1	PSMG3-AS1	20.12	1715.61	-11.1	126	138	S5:Phosphorylation (STY):22.45;S7:Phosphorylation (STY):0.00;S10:Phosphorylation (STY):0.00	S132	SWILSPSSMSEPR	2536.54	7791.71
Q96PY0	Q96PY0|K1908_HUMAN	S	SWILS(+79.97)PS(+79.97)SMS(+79.97)EPR	10	13	Putative uncharacterized protein PSMG3-AS1 OS=Homo sapiens OX=9606 GN=PSMG3-AS1 PE=5 SV=2	Putative uncharacterized protein PSMG3-AS1	PSMG3-AS1	20.12	1715.61	-11.1	126	138	S5:Phosphorylation (STY):22.45;S7:Phosphorylation (STY):0.00;S10:Phosphorylation (STY):0.00	S135	LSPSSMSEPRRGK	2536.54	7791.71
Q9UQ35	Q9UQ35|SRRM2_HUMAN	S	QSHSGSIS(+79.97)PYPK	8	12	Serine/arginine repetitive matrix protein 2 OS=Homo sapiens OX=9606 GN=SRRM2 PE=1 SV=2	Serine/arginine repetitive matrix protein 2	SRRM2	64.5	1366.59	1	987	998	S8:Phosphorylation (STY):27.83	S994	SHSGSISPYPKVK	16165.2	50649.5
P25440	P25440|BRD2_HUMAN	Y	TAPPALPTGY(+79.97)DSEEEEESRPMSYDEK	10	26	Bromodomain-containing protein 2 OS=Homo sapiens OX=9606 GN=BRD2 PE=1 SV=2	Bromodomain-containing protein 2	BRD2	36.85	3007.23	1.9	622	647	Y10:Phosphorylation (STY):0.00	Y631	PALPTGYDSEEEE	4951.87	15856.3
Q96KQ4	Q96KQ4|ASPP1_HUMAN	S	S(+79.97)SITEPEGPGGPNIQK	1	16	Apoptosis-stimulating of p53 protein 1 OS=Homo sapiens OX=9606 GN=PPP1R13B PE=1 SV=3	Apoptosis-stimulating of p53 protein 1	PPP1R13B	44.09	1689.76	-1.9	709	724	S1:Phosphorylation (STY):0.00	S709	RPLKKRSSITEPE	35.0311	112.433
Q9UQ35	Q9UQ35|SRRM2_HUMAN	S	QSHS(+79.97)GSISPYPK	4	12	Serine/arginine repetitive matrix protein 2 OS=Homo sapiens OX=9606 GN=SRRM2 PE=1 SV=2	Serine/arginine repetitive matrix protein 2	SRRM2	43.94	1366.59	-0.8	987	998	S4:Phosphorylation (STY):0.00	S990	PPRQSHSGSISPY	15734.6	50505.1
P78356	P78356|PI42B_HUMAN	T	AEDEEC(+57.02)ENDGVGGNLLC(+57.02)SYGT(+79.97)PPDS(+79.97)PGNLLSFPR	21	34	Phosphatidylinositol 5-phosphate 4-kinase type-2 beta OS=Homo sapiens OX=9606 GN=PIP4K2B PE=1 SV=1	Phosphatidylinositol 5-phosphate 4-kinase type-2 beta	PIP4K2B	75.07	3825.52	-0.9	302	335	C6:Carbamidomethylation:1000.00;C17:Carbamidomethylation:1000.00;T21:Phosphorylation (STY):22.45;S25:Phosphorylation (STY):26.08	T322	LLCSYGTPPDSPG	6984.14	22543.3
P78356	P78356|PI42B_HUMAN	S	AEDEEC(+57.02)ENDGVGGNLLC(+57.02)SYGT(+79.97)PPDS(+79.97)PGNLLSFPR	25	34	Phosphatidylinositol 5-phosphate 4-kinase type-2 beta OS=Homo sapiens OX=9606 GN=PIP4K2B PE=1 SV=1	Phosphatidylinositol 5-phosphate 4-kinase type-2 beta	PIP4K2B	75.07	3825.52	-0.9	302	335	C6:Carbamidomethylation:1000.00;C17:Carbamidomethylation:1000.00;T21:Phosphorylation (STY):22.45;S25:Phosphorylation (STY):26.08	S326	YGTPPDSPGNLLS	6984.14	22543.3
Q9H000	Q9H000|MKRN2_HUMAN	S	TQPSMVSNPGSC(+57.02)SDPQPS(+79.97)PEMKPHSYLDAIR	18	31	E3 ubiquitin-protein ligase makorin-2 OS=Homo sapiens OX=9606 GN=MKRN2 PE=1 SV=2	E3 ubiquitin-protein ligase makorin-2	MKRN2	34.43	3492.51	-0.3	122	152	C12:Carbamidomethylation:1000.00;S18:Phosphorylation (STY):0.00	S139	CSDPQPSPEMKPH	4176.24	13533.9
P29374	P29374|ARI4A_HUMAN	S	ISSFGQNEAGSEPHIEAHS(+79.97)LELSSLDNK	19	28	AT-rich interactive domain-containing protein 4A OS=Homo sapiens OX=9606 GN=ARID4A PE=1 SV=3	AT-rich interactive domain-containing protein 4A	ARID4A	30.01	3075.38	-4.9	809	836	S19:Phosphorylation (STY):4.73	S827	PHIEAHSLELSSL	32.2791	104.642
P17812	P17812|PYRG1_HUMAN	S	SGSS(+79.97)SPDSEITELK	4	14	CTP synthase 1 OS=Homo sapiens OX=9606 GN=CTPS1 PE=1 SV=2	CTP synthase 1	CTPS1	60.77	1515.63	-0.6	571	584	S4:Phosphorylation (STY):7.65	S574	SDRSGSSSPDSEI	56591.7	183844
O60256	O60256|KPRB_HUMAN	T	M(+42.01)(+15.99)FC(+57.02)VT(+79.97)PPELETK	5	12	Phosphoribosyl pyrophosphate synthase-associated protein 2 OS=Homo sapiens OX=9606 GN=PRPSAP2 PE=1 SV=1	Phosphoribosyl pyrophosphate synthase-associated protein 2	PRPSAP2	24.95	1588.66	-2.9	1	12	M1:Acetylation (Protein N-term):1000.00;)1:Oxidation (M):1000.00;C3:Carbamidomethylation:1000.00;T5:Phosphorylation (STY):10.92	T5	__MFCVTPPELET	30.2529	99.5419
Q32P28	Q32P28|P3H1_HUMAN	S	MLFSPEEMDLS(+79.97)QEQPLDAQQGPPEPAQESLSGSESKPK	11	38	Prolyl 3-hydroxylase 1 OS=Homo sapiens OX=9606 GN=P3H1 PE=1 SV=2	Prolyl 3-hydroxylase 1	P3H1	67.83	4220.88	3.8	696	733	S11:Phosphorylation (STY):50.34	S706	PEEMDLSQEQPLD	19613.4	64662.6
P39023	P39023|RL3_HUMAN	S	H(+42.01)GS(+79.97)LGFLPR	3	9	60S ribosomal protein L3 OS=Homo sapiens OX=9606 GN=RPL3 PE=1 SV=2	60S ribosomal protein L3	RPL3	52.29	1104.51	-4.1	11	19		S13	SAPRHGSLGFLPR	12422.7	41233.8
Q8NC96	Q8NC96|NECP1_HUMAN	T	VTIPPPSSSVAISNHVT(+79.97)PPPIPK	17	23	Adaptin ear-binding coat-associated protein 1 OS=Homo sapiens OX=9606 GN=NECAP1 PE=1 SV=2	Adaptin ear-binding coat-associated protein 1	NECAP1	38.63	2414.26	-4.5	195	217	T17:Phosphorylation (STY):4.69	T211	AISNHVTPPPIPK	4334.43	14399.7
O60341	O60341|KDM1A_HUMAN	S	EPPRAS(+79.97)PPGGLAEPPGSAGPQAGPTVVPGSATPMETGIAETPEGR	6	45	Lysine-specific histone demethylase 1A OS=Homo sapiens OX=9606 GN=KDM1A PE=1 SV=2	Lysine-specific histone demethylase 1A	KDM1A	60.15	4354.06	-5.4	64	108	S6:Phosphorylation (STY):0.00	S69	KEPPRASPPGGLA	7845.21	26079.6
P49757	P49757|NUMB_HUMAN	T	IVVGSSVAPGNTAPSPSSPT(+79.97)SPTSDATTSLEMNNPHAIPR	20	40	Protein numb homolog OS=Homo sapiens OX=9606 GN=NUMB PE=1 SV=2	Protein numb homolog	NUMB	55.27	4023.89	1.8	224	263	T20:Phosphorylation (STY):0.00	T243	PSPSSPTSPTSDA	2315.08	7710.41
Q7LBC6	Q7LBC6|KDM3B_HUMAN	S	S(+79.97)SSPTSSLTQPIEMPTLSSSPTEERPT(+79.97)VGPGQQDNPLLK	1	39	Lysine-specific demethylase 3B OS=Homo sapiens OX=9606 GN=KDM3B PE=1 SV=2	Lysine-specific demethylase 3B	KDM3B	54.46	4252.95	0.1	725	763	S1:Phosphorylation (STY):0.00;T27:Phosphorylation (STY):0.00	S725	AMGNGRSSSPTSS	28029.7	94100.6
Q7LBC6	Q7LBC6|KDM3B_HUMAN	T	S(+79.97)SSPTSSLTQPIEMPTLSSSPTEERPT(+79.97)VGPGQQDNPLLK	27	39	Lysine-specific demethylase 3B OS=Homo sapiens OX=9606 GN=KDM3B PE=1 SV=2	Lysine-specific demethylase 3B	KDM3B	54.46	4252.95	0.1	725	763	S1:Phosphorylation (STY):0.00;T27:Phosphorylation (STY):0.00	T751	PTEERPTVGPGQQ	28029.7	94100.6
Q15149	Q15149|PLEC_HUMAN	S	S(+79.97)RSSS(+79.97)VGSSSSYPIS(+79.97)PAVSR	1	20	Plectin OS=Homo sapiens OX=9606 GN=PLEC PE=1 SV=3	Plectin	PLEC	42.59	2236.88	0.9	4382	4401	S1:Phosphorylation (STY):0.00;S5:Phosphorylation (STY):11.10;S15:Phosphorylation (STY):8.26	S4382	NAGGFRSRSSSVG	4867.63	16503.1
Q15149	Q15149|PLEC_HUMAN	S	S(+79.97)RSSS(+79.97)VGSSSSYPIS(+79.97)PAVSR	5	20	Plectin OS=Homo sapiens OX=9606 GN=PLEC PE=1 SV=3	Plectin	PLEC	42.59	2236.88	0.9	4382	4401	S1:Phosphorylation (STY):0.00;S5:Phosphorylation (STY):11.10;S15:Phosphorylation (STY):8.26	S4386	FRSRSSSVGSSSS	4867.63	16503.1
Q15149	Q15149|PLEC_HUMAN	S	S(+79.97)RSSS(+79.97)VGSSSSYPIS(+79.97)PAVSR	15	20	Plectin OS=Homo sapiens OX=9606 GN=PLEC PE=1 SV=3	Plectin	PLEC	42.59	2236.88	0.9	4382	4401	S1:Phosphorylation (STY):0.00;S5:Phosphorylation (STY):11.10;S15:Phosphorylation (STY):8.26	S4396	SSSYPISPAVSRT	4867.63	16503.1
P22612	P22612|KAPCG_HUMAN	S	LQFS(+79.97)FKDNSYLYLVM(+15.99)EYVPGGEM(+15.99)FSR	4	26	cAMP-dependent protein kinase catalytic subunit gamma OS=Homo sapiens OX=9606 GN=PRKACG PE=1 SV=3	cAMP-dependent protein kinase catalytic subunit gamma	PRKACG	29.33	3231.43	-1.3	107	132	S4:Phosphorylation (STY):39.44;M15:Oxidation (M):1000.00;M23:Oxidation (M):1000.00	S110	LVKLQFSFKDNSY	2325.43	7889.28
Q13950	Q13950|RUNX2_HUMAN	S	RFS(+79.97)PPSSSLQPGK	3	13	Runt-related transcription factor 2 OS=Homo sapiens OX=9606 GN=RUNX2 PE=1 SV=2	Runt-related transcription factor 2	RUNX2	59.26	1466.69	-5.2	26	38	S3:Phosphorylation (STY):44.84	S28	STSRRFSPPSSSL	32210.1	110690
Q08J23	Q08J23|NSUN2_HUMAN	S	AGEPNSPDAEEANS(+79.97)PDVTAGC(+57.02)DPAGVHPPR	14	30	RNA cytosine C(5)-methyltransferase NSUN2 OS=Homo sapiens OX=9606 GN=NSUN2 PE=1 SV=2	RNA cytosine C(5)-methyltransferase NSUN2	NSUN2	79.74	3093.28	-2	738	767	S14:Phosphorylation (STY):25.70;C21:Carbamidomethylation:1000.00	S751	DAEEANSPDVTAG	13948.4	48260
Q9H1E3	Q9H1E3|NUCKS_HUMAN	S	KDDS(+79.97)HSAEDSEDEKEDHK	4	18	Nuclear ubiquitous casein and cyclin-dependent kinase substrate 1 OS=Homo sapiens OX=9606 GN=NUCKS1 PE=1 SV=1	Nuclear ubiquitous casein and cyclin-dependent kinase substrate 1	NUCKS1	84.76	2179.82	-0.6	70	87	S4:Phosphorylation (STY):55.92	S73	KTKKDDSHSAEDS	29542.2	103015
P18583	P18583|SON_HUMAN	S	SAASPVVSSMPERASES(+79.97)S(+79.97)S(+79.97)EEKDDYEIFVK	17	30	Protein SON OS=Homo sapiens OX=9606 GN=SON PE=1 SV=4	Protein SON	SON	24.66	3500.4	-0.3	1766	1795	S17:Phosphorylation (STY):0.00;S18:Phosphorylation (STY):0.00;S19:Phosphorylation (STY):0.00	S1782	PERASESSSEEKD	15881.3	55387.4
P18583	P18583|SON_HUMAN	S	SAASPVVSSMPERASES(+79.97)S(+79.97)S(+79.97)EEKDDYEIFVK	18	30	Protein SON OS=Homo sapiens OX=9606 GN=SON PE=1 SV=4	Protein SON	SON	24.66	3500.4	-0.3	1766	1795	S17:Phosphorylation (STY):0.00;S18:Phosphorylation (STY):0.00;S19:Phosphorylation (STY):0.00	S1783	ERASESSSEEKDD	15881.3	55387.4
P18583	P18583|SON_HUMAN	S	SAASPVVSSMPERASES(+79.97)S(+79.97)S(+79.97)EEKDDYEIFVK	19	30	Protein SON OS=Homo sapiens OX=9606 GN=SON PE=1 SV=4	Protein SON	SON	24.66	3500.4	-0.3	1766	1795	S17:Phosphorylation (STY):0.00;S18:Phosphorylation (STY):0.00;S19:Phosphorylation (STY):0.00	S1784	RASESSSEEKDDY	15881.3	55387.4
Q9BYK8	Q5JPF3|AN36C_HUMAN:Q9BYK8|HELZ2_HUMAN	S	S(+79.97)PPPGLSK	1	8	Helicase with zinc finger domain 2 OS=Homo sapiens OX=9606 GN=HELZ2 PE=1 SV=6	Helicase with zinc finger domain 2	HELZ2	21.75	861.4	0.3	80	87	S1:Phosphorylation (STY):41.24	S80	LPWEHRSPPPGLS	2193.85	7654.06
P30566	P30566|PUR8_HUMAN	S	A(+42.01)AGGDHGS(+79.97)PDSYR	8	13	Adenylosuccinate lyase OS=Homo sapiens OX=9606 GN=ADSL PE=1 SV=2	Adenylosuccinate lyase	ADSL	57.85	1410.52	0.9	2	14	A1:Acetylation (Protein N-term):1000.00;S8:Phosphorylation (STY):47.36	S9	AGGDHGSPDSYRS	4620.84	16122.8
Q15435	Q15435|PP1R7_HUMAN	S	VESEES(+79.97)GDEEGKK	6	13	Protein phosphatase 1 regulatory subunit 7 OS=Homo sapiens OX=9606 GN=PPP1R7 PE=1 SV=1	Protein phosphatase 1 regulatory subunit 7	PPP1R7	69.06	1501.58	3.6	22	34	S6:Phosphorylation (STY):73.31	S27	RVESEESGDEEGK	4069.27	14275.4
P51858	P51858|HDGF_HUMAN	S	RAGDLLEDS(+79.97)PK	9	11	Hepatoma-derived growth factor OS=Homo sapiens OX=9606 GN=HDGF PE=1 SV=1	Hepatoma-derived growth factor	HDGF	54.3	1279.58	0.1	157	167		S165	GDLLEDSPKRPKE	124280	437127
P07910	P07910|HNRPC_HUMAN	S	MESEGGADDS(+79.97)AEEGDLLDDDDNEDRGDDQLELIKDDEK	10	38	Heterogeneous nuclear ribonucleoproteins C1/C2 OS=Homo sapiens OX=9606 GN=HNRNPC PE=1 SV=4	Heterogeneous nuclear ribonucleoproteins C1/C2	HNRNPC	131.12	4276.68	-1.9	251	288	S10:Phosphorylation (STY):213.20	S260	EGGADDSAEEGDL	2278.05	8067.89
Q8ND56	Q8ND56|LS14A_HUMAN	S	TQLS(+79.97)QGRSSPQLD	4	13	Protein LSM14 homolog A OS=Homo sapiens OX=9606 GN=LSM14A PE=1 SV=3	Protein LSM14 homolog A	LSM14A	24.19	1495.67	0.9	175	187	S4:Phosphorylation (STY):7.77	S178	SLKTQLSQGRSSP	2195.18	7826.68
P46821	P46821|MAP1B_HUMAN	S	GEAEQS(+79.97)EEEADEEDKAEDAREEEYEPEK	6	28	Microtubule-associated protein 1B OS=Homo sapiens OX=9606 GN=MAP1B PE=1 SV=2	Microtubule-associated protein 1B	MAP1B	66.33	3349.28	1.5	1011	1038	S6:Phosphorylation (STY):99.98	S1016	KGEAEQSEEEADE	132533	473084
Q69YN4	Q69YN4|VIR_HUMAN	S	VIS(+79.97)HDRDSPPPPPPPPPPPQPQPSLK	3	26	Protein virilizer homolog OS=Homo sapiens OX=9606 GN=VIRMA PE=1 SV=2	Protein virilizer homolog	VIRMA	66.43	2853.42	-1.5	131	156	S3:Phosphorylation (STY):2.14	S133	SVDRVISHDRDSP	20509.5	73564.9
Q15185	Q15185|TEBP_HUMAN	S	FSEMMNNMGGDEDVDLPEVDGADDDSQDS(+79.97)DDEK	29	33	Prostaglandin E synthase 3 OS=Homo sapiens OX=9606 GN=PTGES3 PE=1 SV=1	Prostaglandin E synthase 3	PTGES3	144.24	3700.32	2.5	123	155	S29:Phosphorylation (STY):37.54	S151	DDDSQDSDDEKMP	52096.6	186933
Q15020	Q15020|SART3_HUMAN	S	A(+42.01)TAAETS(+79.97)AS(+79.97)EPEAESK	7	16	Squamous cell carcinoma antigen recognized by T-cells 3 OS=Homo sapiens OX=9606 GN=SART3 PE=1 SV=1	Squamous cell carcinoma antigen recognized by T-cells 3	SART3	62.19	1779.65	-1.3	2	17	A1:Acetylation (Protein N-term):1000.00;S7:Phosphorylation (STY):27.96;S9:Phosphorylation (STY):34.94	S8	ATAAETSASEPEA	5933.62	21355.7
Q15020	Q15020|SART3_HUMAN	S	A(+42.01)TAAETS(+79.97)AS(+79.97)EPEAESK	9	16	Squamous cell carcinoma antigen recognized by T-cells 3 OS=Homo sapiens OX=9606 GN=SART3 PE=1 SV=1	Squamous cell carcinoma antigen recognized by T-cells 3	SART3	62.19	1779.65	-1.3	2	17	A1:Acetylation (Protein N-term):1000.00;S7:Phosphorylation (STY):27.96;S9:Phosphorylation (STY):34.94	S10	AAETSASEPEAES	5933.62	21355.7
Q09666	Q09666|AHNK_HUMAN	T	EFSGPSTPTGT(+79.97)LEFEGGEVSLEGGK	11	25	Neuroblast differentiation-associated protein AHNAK OS=Homo sapiens OX=9606 GN=AHNAK PE=1 SV=2	Neuroblast differentiation-associated protein AHNAK	AHNAK	51.74	2591.13	-4.4	5788	5812	T11:Phosphorylation (STY):34.08	T5798	PSTPTGTLEFEGG	13921.9	50506.4
Q9BZL4	Q9BZL4|PP12C_HUMAN	S	LPEPSVLSEVTKPPPC(+57.02)LENS(+79.97)SPPSR	20	25	Protein phosphatase 1 regulatory subunit 12C OS=Homo sapiens OX=9606 GN=PPP1R12C PE=1 SV=1	Protein phosphatase 1 regulatory subunit 12C	PPP1R12C	49.66	2796.34	-3.4	479	503	C16:Carbamidomethylation:1000.00;S20:Phosphorylation (STY):0.00	S498	PPCLENSSPPSRI	7791.9	28300.8
Q08J23	Q08J23|NSUN2_HUMAN	T	AGEPNSPDAEEANSPDVT(+79.97)AGC(+57.02)DPAGVHPPR	18	30	RNA cytosine C(5)-methyltransferase NSUN2 OS=Homo sapiens OX=9606 GN=NSUN2 PE=1 SV=2	RNA cytosine C(5)-methyltransferase NSUN2	NSUN2	47.29	3093.28	-1.2	738	767	T18:Phosphorylation (STY):0.00;C21:Carbamidomethylation:1000.00	T755	ANSPDVTAGCDPA	13271.7	48260
P78559	P78559|MAP1A_HUMAN	S	DRWPEVSPEDTQS(+79.97)LSLSEESPSK	13	23	Microtubule-associated protein 1A OS=Homo sapiens OX=9606 GN=MAP1A PE=1 SV=6	Microtubule-associated protein 1A	MAP1A	62.94	2682.17	-2.3	1184	1206	S13:Phosphorylation (STY):18.70	S1196	SPEDTQSLSLSEE	6203.91	22560.3
Q96ST2	Q96ST2|IWS1_HUMAN	S	GHHVTDS(+79.97)ENDEPLNLNASDS(+79.97)ESEELHR	7	27	Protein IWS1 homolog OS=Homo sapiens OX=9606 GN=IWS1 PE=1 SV=2	Protein IWS1 homolog	IWS1	69.55	3190.25	-3	63	89	S7:Phosphorylation (STY):5.47;S20:Phosphorylation (STY):0.00	S69	GHHVTDSENDEPL	3828.25	14003.6
Q96ST2	Q96ST2|IWS1_HUMAN	S	GHHVTDS(+79.97)ENDEPLNLNASDS(+79.97)ESEELHR	20	27	Protein IWS1 homolog OS=Homo sapiens OX=9606 GN=IWS1 PE=1 SV=2	Protein IWS1 homolog	IWS1	69.55	3190.25	-3	63	89	S7:Phosphorylation (STY):5.47;S20:Phosphorylation (STY):0.00	S82	NLNASDSESEELH	3828.25	14003.6
P19338	P19338|NUCL_HUMAN	S	EVEEDSEDEEMSEDEEDDS(+79.97)SGEEVVIPQK	19	29	Nucleolin OS=Homo sapiens OX=9606 GN=NCL PE=1 SV=3	Nucleolin	NCL	122.71	3392.27	-0.9	23	51	S19:Phosphorylation (STY):0.00	S41	EDEEDDSSGEEVV	38218.5	140596
Q8WXI9	P46821|MAP1B_HUMAN:Q8WXI9|P66B_HUMAN	T	GRLT(+79.97)PS(+79.97)PDIIVLS(+79.97)DNEASS(+79.97)PR	4	21	Transcriptional repressor p66-beta OS=Homo sapiens OX=9606 GN=GATAD2B PE=1 SV=1	Transcriptional repressor p66-beta	GATAD2B	52.1	2543.01	-7.3	117	137	T4:Phosphorylation (STY):95.14;S6:Phosphorylation (STY):69.89;S13:Phosphorylation (STY):14.62;S19:Phosphorylation (STY):11.06	T120	PERGRLTPSPDII	9694.59	35754.2
Q8WXI9	P46821|MAP1B_HUMAN:Q8WXI9|P66B_HUMAN	S	GRLT(+79.97)PS(+79.97)PDIIVLS(+79.97)DNEASS(+79.97)PR	6	21	Transcriptional repressor p66-beta OS=Homo sapiens OX=9606 GN=GATAD2B PE=1 SV=1	Transcriptional repressor p66-beta	GATAD2B	52.1	2543.01	-7.3	117	137	T4:Phosphorylation (STY):95.14;S6:Phosphorylation (STY):69.89;S13:Phosphorylation (STY):14.62;S19:Phosphorylation (STY):11.06	S122	RGRLTPSPDIIVL	9694.59	35754.2
Q8WXI9	P46821|MAP1B_HUMAN:Q8WXI9|P66B_HUMAN	S	GRLT(+79.97)PS(+79.97)PDIIVLS(+79.97)DNEASS(+79.97)PR	13	21	Transcriptional repressor p66-beta OS=Homo sapiens OX=9606 GN=GATAD2B PE=1 SV=1	Transcriptional repressor p66-beta	GATAD2B	52.1	2543.01	-7.3	117	137	T4:Phosphorylation (STY):95.14;S6:Phosphorylation (STY):69.89;S13:Phosphorylation (STY):14.62;S19:Phosphorylation (STY):11.06	S129	PDIIVLSDNEASS	9694.59	35754.2
Q8WXI9	P46821|MAP1B_HUMAN:Q8WXI9|P66B_HUMAN	S	GRLT(+79.97)PS(+79.97)PDIIVLS(+79.97)DNEASS(+79.97)PR	19	21	Transcriptional repressor p66-beta OS=Homo sapiens OX=9606 GN=GATAD2B PE=1 SV=1	Transcriptional repressor p66-beta	GATAD2B	52.1	2543.01	-7.3	117	137	T4:Phosphorylation (STY):95.14;S6:Phosphorylation (STY):69.89;S13:Phosphorylation (STY):14.62;S19:Phosphorylation (STY):11.06	S135	SDNEASSPRSSSR	9694.59	35754.2
Q96T23	Q96T23|RSF1_HUMAN	S	QINYKEDS(+79.97)ES(+79.97)DGS(+79.97)QK	8	15	Remodeling and spacing factor 1 OS=Homo sapiens OX=9606 GN=RSF1 PE=1 SV=2	Remodeling and spacing factor 1	RSF1	41.75	1966.66	-2.4	1214	1228	S8:Phosphorylation (STY):58.99;S10:Phosphorylation (STY):62.39;S13:Phosphorylation (STY):62.82	S1221	INYKEDSESDGSQ	3970.73	14847.1
Q96T23	Q96T23|RSF1_HUMAN	S	QINYKEDS(+79.97)ES(+79.97)DGS(+79.97)QK	10	15	Remodeling and spacing factor 1 OS=Homo sapiens OX=9606 GN=RSF1 PE=1 SV=2	Remodeling and spacing factor 1	RSF1	41.75	1966.66	-2.4	1214	1228	S8:Phosphorylation (STY):58.99;S10:Phosphorylation (STY):62.39;S13:Phosphorylation (STY):62.82	S1223	YKEDSESDGSQKS	3970.73	14847.1
Q96T23	Q96T23|RSF1_HUMAN	S	QINYKEDS(+79.97)ES(+79.97)DGS(+79.97)QK	13	15	Remodeling and spacing factor 1 OS=Homo sapiens OX=9606 GN=RSF1 PE=1 SV=2	Remodeling and spacing factor 1	RSF1	41.75	1966.66	-2.4	1214	1228	S8:Phosphorylation (STY):58.99;S10:Phosphorylation (STY):62.39;S13:Phosphorylation (STY):62.82	S1226	DSESDGSQKSLRR	3970.73	14847.1
P49023	P49023|PAXI_HUMAN	T	T(+79.97)GSSSPPGGPPKPGSQLDSM(+15.99)LGSLQSDLNK	1	30	Paxillin OS=Homo sapiens OX=9606 GN=PXN PE=1 SV=3	Paxillin	PXN	74.98	3034.4	-4	318	347	T1:Phosphorylation (STY):0.00;M20:Oxidation (M):1000.00	T318	FMAQGKTGSSSPP	13817.1	51938.9
O15173	O15173|PGRC2_HUMAN	T	LLKPGEEPSEYT(+79.97)DEEDTKDHNKQD	12	24	Membrane-associated progesterone receptor component 2 OS=Homo sapiens OX=9606 GN=PGRMC2 PE=1 SV=1	Membrane-associated progesterone receptor component 2	PGRMC2	77.8	2896.23	-2.4	200	223	T12:Phosphorylation (STY):0.00	T211	EEPSEYTDEEDTK	53033.1	200710
P53999	P53999|TCP4_HUMAN	S	ELVSSS(+79.97)S(+79.97)SGSDSDSEVDK	6	18	Activated RNA polymerase II transcriptional coactivator p15 OS=Homo sapiens OX=9606 GN=SUB1 PE=1 SV=3	Activated RNA polymerase II transcriptional coactivator p15	SUB1	60.02	1973.7	0.8	6	23	S6:Phosphorylation (STY):10.11;S7:Phosphorylation (STY):18.53	S11	KELVSSSSSGSDS	10052.7	38414.6
P53999	P53999|TCP4_HUMAN	S	ELVSSS(+79.97)S(+79.97)SGSDSDSEVDK	7	18	Activated RNA polymerase II transcriptional coactivator p15 OS=Homo sapiens OX=9606 GN=SUB1 PE=1 SV=3	Activated RNA polymerase II transcriptional coactivator p15	SUB1	60.02	1973.7	0.8	6	23	S6:Phosphorylation (STY):10.11;S7:Phosphorylation (STY):18.53	S12	ELVSSSSSGSDSD	10052.7	38414.6
Q8IZD4	Q8IZD4|DCP1B_HUMAN	S	TPNTEQQTPLFQVIS(+79.97)PQR	15	18	mRNA-decapping enzyme 1B OS=Homo sapiens OX=9606 GN=DCP1B PE=1 SV=2	mRNA-decapping enzyme 1B	DCP1B	41.09	2163.04	-0.5	497	514	S15:Phosphorylation (STY):37.50	S511	PLFQVISPQRIPA	4923.12	18955.6
P08238	P08238|HS90B_HUMAN:Q58FF8|H90B2_HUMAN	S	IEDVGS(+79.97)DEEDDSGKDK	6	16	Heat shock protein HSP 90-beta OS=Homo sapiens OX=9606 GN=HSP90AB1 PE=1 SV=4	Heat shock protein HSP 90-beta	HSP90AB1	72.81	1816.69	-11.1	250	265	S6:Phosphorylation (STY):177.60	S255	KIEDVGSDEEDDS	8822.25	34028
O60841	O60841|IF2P_HUMAN	Y	VEM(+15.99)Y(+79.97)SGSDDDDDFNKLPK	4	18	Eukaryotic translation initiation factor 5B OS=Homo sapiens OX=9606 GN=EIF5B PE=1 SV=4	Eukaryotic translation initiation factor 5B	EIF5B	45.44	2169.84	-0.6	131	148	M3:Oxidation (M):1000.00;Y4:Phosphorylation (STY):0.00	Y134	KPKVEMYSGSDDD	4679.73	18119.1
P11274	P11274|BCR_HUMAN	S	VS(+79.97)PSPTTYR	2	9	Breakpoint cluster region protein OS=Homo sapiens OX=9606 GN=BCR PE=1 SV=2	Breakpoint cluster region protein	BCR	35.46	1086.47	-3.9	353	361	S2:Phosphorylation (STY):39.76	S354	GQSSRVSPSPTTY	4784.27	18536.4
Q641Q2	Q641Q2|WAC2A_HUMAN	T	T(+79.97)TPDQELAPASEPVWERPWSVEEIR	1	25	WASH complex subunit 2A OS=Homo sapiens OX=9606 GN=WASHC2A PE=1 SV=3	WASH complex subunit 2A	WASHC2A	57.68	3001.39	-2.9	5	29	T1:Phosphorylation (STY):0.00	T5	__MMNRTTPDQEL	19183.5	74815.7
Q05209	Q05209|PTN12_HUMAN	S	EEILQPPEPHPVPPILTPS(+79.97)PPSAFPTVTTVWQDNDR	19	36	Tyrosine-protein phosphatase non-receptor type 12 OS=Homo sapiens OX=9606 GN=PTPN12 PE=1 SV=3	Tyrosine-protein phosphatase non-receptor type 12	PTPN12	83.33	4080.99	3.9	351	386	S19:Phosphorylation (STY):9.42	S369	PPILTPSPPSAFP	38401.2	150850
P18583	P18583|SON_HUMAN	S	SAASPVVSSMPERAS(+79.97)ES(+79.97)S(+79.97)SEEKDDYEIFVK	15	30	Protein SON OS=Homo sapiens OX=9606 GN=SON PE=1 SV=4	Protein SON	SON	43.29	3500.4	0.2	1766	1795	S15:Phosphorylation (STY):0.00;S17:Phosphorylation (STY):0.00;S18:Phosphorylation (STY):0.00	S1780	SMPERASESSSEE	14056.9	55387.4
P18583	P18583|SON_HUMAN	S	SAASPVVSSMPERAS(+79.97)ES(+79.97)S(+79.97)SEEKDDYEIFVK	17	30	Protein SON OS=Homo sapiens OX=9606 GN=SON PE=1 SV=4	Protein SON	SON	43.29	3500.4	0.2	1766	1795	S15:Phosphorylation (STY):0.00;S17:Phosphorylation (STY):0.00;S18:Phosphorylation (STY):0.00	S1782	PERASESSSEEKD	14056.9	55387.4
P18583	P18583|SON_HUMAN	S	SAASPVVSSMPERAS(+79.97)ES(+79.97)S(+79.97)SEEKDDYEIFVK	18	30	Protein SON OS=Homo sapiens OX=9606 GN=SON PE=1 SV=4	Protein SON	SON	43.29	3500.4	0.2	1766	1795	S15:Phosphorylation (STY):0.00;S17:Phosphorylation (STY):0.00;S18:Phosphorylation (STY):0.00	S1783	ERASESSSEEKDD	14056.9	55387.4
P53999	P53999|TCP4_HUMAN	S	ELVS(+79.97)S(+79.97)S(+79.97)SSGSDSDSEVDKK	4	19	Activated RNA polymerase II transcriptional coactivator p15 OS=Homo sapiens OX=9606 GN=SUB1 PE=1 SV=3	Activated RNA polymerase II transcriptional coactivator p15	SUB1	41.8	2181.76	-0.5	6	24	S4:Phosphorylation (STY):7.38;S5:Phosphorylation (STY):0.00;S6:Phosphorylation (STY):0.00	S9	KSKELVSSSSSGS	12913.3	50981.7
P53999	P53999|TCP4_HUMAN	S	ELVS(+79.97)S(+79.97)S(+79.97)SSGSDSDSEVDKK	5	19	Activated RNA polymerase II transcriptional coactivator p15 OS=Homo sapiens OX=9606 GN=SUB1 PE=1 SV=3	Activated RNA polymerase II transcriptional coactivator p15	SUB1	41.8	2181.76	-0.5	6	24	S4:Phosphorylation (STY):7.38;S5:Phosphorylation (STY):0.00;S6:Phosphorylation (STY):0.00	S10	SKELVSSSSSGSD	12913.3	50981.7
P53999	P53999|TCP4_HUMAN	S	ELVS(+79.97)S(+79.97)S(+79.97)SSGSDSDSEVDKK	6	19	Activated RNA polymerase II transcriptional coactivator p15 OS=Homo sapiens OX=9606 GN=SUB1 PE=1 SV=3	Activated RNA polymerase II transcriptional coactivator p15	SUB1	41.8	2181.76	-0.5	6	24	S4:Phosphorylation (STY):7.38;S5:Phosphorylation (STY):0.00;S6:Phosphorylation (STY):0.00	S11	KELVSSSSSGSDS	12913.3	50981.7
Q7Z5J4	Q7Z5J4|RAI1_HUMAN	S	AAS(+79.97)SPSNPAALPVASDSS(+79.97)PMGSK	3	23	Retinoic acid-induced protein 1 OS=Homo sapiens OX=9606 GN=RAI1 PE=1 SV=2	Retinoic acid-induced protein 1	RAI1	24.42	2287.94	-3.4	1105	1127	S3:Phosphorylation (STY):0.00;S18:Phosphorylation (STY):4.05	S1107	PSPKAASSPSNPA	31.5864	125.233
Q7Z5J4	Q7Z5J4|RAI1_HUMAN	S	AAS(+79.97)SPSNPAALPVASDSS(+79.97)PMGSK	18	23	Retinoic acid-induced protein 1 OS=Homo sapiens OX=9606 GN=RAI1 PE=1 SV=2	Retinoic acid-induced protein 1	RAI1	24.42	2287.94	-3.4	1105	1127	S3:Phosphorylation (STY):0.00;S18:Phosphorylation (STY):4.05	S1122	PVASDSSPMGSKT	31.5864	125.233
P08238	P08238|HS90B_HUMAN:Q58FF8|H90B2_HUMAN	S	IEDVGS(+79.97)DEEDDSGK	6	14	Heat shock protein HSP 90-beta OS=Homo sapiens OX=9606 GN=HSP90AB1 PE=1 SV=4	Heat shock protein HSP 90-beta	HSP90AB1	72.28	1573.57	-5.6	250	263	S6:Phosphorylation (STY):143.14	S255	KIEDVGSDEEDDS	802077	3.18636e+06
P49792	P49792|RBP2_HUMAN	T	NHET(+79.97)DGGSAHGDDDDDGPHFEPVVPLPDKIEVK	4	33	E3 SUMO-protein ligase RanBP2 OS=Homo sapiens OX=9606 GN=RANBP2 PE=1 SV=2	E3 SUMO-protein ligase RanBP2	RANBP2	60.31	3617.56	-2.1	1153	1185	T4:Phosphorylation (STY):0.00	T1156	ANKNHETDGGSAH	4903.49	19546.4
Q5T200	Q5T200|ZC3HD_HUMAN	S	LSPS(+79.97)PSLR	4	8	Zinc finger CCCH domain-containing protein 13 OS=Homo sapiens OX=9606 GN=ZC3H13 PE=1 SV=1	Zinc finger CCCH domain-containing protein 13	ZC3H13	25.36	935.448	-3.9	206	213	S4:Phosphorylation (STY):14.04	S209	RSKLSPSPSLRKS	1968.37	7854.03
O94916	O94916|NFAT5_HUMAN	S	EIS(+79.97)SPARPC(+57.02)SFEEAMK	3	16	Nuclear factor of activated T-cells 5 OS=Homo sapiens OX=9606 GN=NFAT5 PE=1 SV=1	Nuclear factor of activated T-cells 5	NFAT5	20.19	1917.8	1.1	558	573	S3:Phosphorylation (STY):0.00;C9:Carbamidomethylation:1000.00	S560	NVKKEISSPARPC	5646.45	22735.7
Q86VQ1	Q86VQ1|GLCI1_HUMAN	S	SAS(+79.97)WGSADQLK	3	11	Glucocorticoid-induced transcript 1 protein OS=Homo sapiens OX=9606 GN=GLCCI1 PE=1 SV=1	Glucocorticoid-induced transcript 1 protein	GLCCI1	58.58	1228.51	-3.4	221	231	S3:Phosphorylation (STY):4.64	S223	SHQRSASWGSADQ	3047.56	12280
P46100	P46100|ATRX_HUMAN	S	RPTETNPVTSNS(+79.97)DEEC(+57.02)NETVK	12	21	Transcriptional regulator ATRX OS=Homo sapiens OX=9606 GN=ATRX PE=1 SV=6	Transcriptional regulator ATRX	ATRX	82.09	2486.03	-2.5	666	686	S12:Phosphorylation (STY):33.18;C16:Carbamidomethylation:1000.00	S677	NPVTSNSDEECNE	15535.1	62971.8
O43865	O43865|SAHH2_HUMAN	S	SISQSSTDSYSSAASYTDS(+79.97)SDDEVSPR	19	27	S-adenosylhomocysteine hydrolase-like protein 1 OS=Homo sapiens OX=9606 GN=AHCYL1 PE=1 SV=2	S-adenosylhomocysteine hydrolase-like protein 1	AHCYL1	52.17	2908.14	-2.2	66	92	S19:Phosphorylation (STY):0.00	S84	AASYTDSSDDEVS	4804.8	19519.6
Q9NR19	Q9NR19|ACSA_HUMAN	S	AELGMGDSTSQS(+79.97)PPIKR	12	17	Acetyl-coenzyme A synthetase, cytoplasmic OS=Homo sapiens OX=9606 GN=ACSS2 PE=1 SV=1	Acetyl-coenzyme A synthetase, cytoplasmic	ACSS2	68.83	1852.84	0.6	256	272	S12:Phosphorylation (STY):20.41	S267	GDSTSQSPPIKRS	9351.17	38341.4
P46821	P46821|MAP1B_HUMAN	S	DYNASASTIS(+79.97)PPSSMEEDK	10	19	Microtubule-associated protein 1B OS=Homo sapiens OX=9606 GN=MAP1B PE=1 SV=2	Microtubule-associated protein 1B	MAP1B	76.89	2107.83	1.1	1199	1217	S10:Phosphorylation (STY):30.72	S1208	ASASTISPPSSME	30713.2	126073
Q12996	Q12996|CSTF3_HUMAN	S	RPNEDS(+79.97)DEDEEK	6	12	Cleavage stimulation factor subunit 3 OS=Homo sapiens OX=9606 GN=CSTF3 PE=1 SV=1	Cleavage stimulation factor subunit 3	CSTF3	61.06	1541.55	1.8	686	697		S691	KRPNEDSDEDEEK	14585.1	59950.1
Q96F63	Q96F63|CCD97_HUMAN	S	LLQQQEEEEAC(+57.02)LEEEEEEEDS(+79.97)DEEDQR	21	27	Coiled-coil domain-containing protein 97 OS=Homo sapiens OX=9606 GN=CCDC97 PE=1 SV=1	Coiled-coil domain-containing protein 97	CCDC97	82.61	3446.3	-1.6	237	263	C11:Carbamidomethylation:1000.00	S257	EEEEEDSDEEDQR	4110.95	17182.9
O43865	O43865|SAHH2_HUMAN	S	SISQSSTDSYSSAASYTDSS(+79.97)DDEVSPR	20	27	S-adenosylhomocysteine hydrolase-like protein 1 OS=Homo sapiens OX=9606 GN=AHCYL1 PE=1 SV=2	S-adenosylhomocysteine hydrolase-like protein 1	AHCYL1	47.67	2908.14	-1.6	66	92	S20:Phosphorylation (STY):10.19	S85	ASYTDSSDDEVSP	4804.8	20125.5
Q14160	Q14160|SCRIB_HUMAN	S	AFAAVPTSHPPEDAPAQPPTPGPAAS(+79.97)PEQLSFR	26	33	Protein scribble homolog OS=Homo sapiens OX=9606 GN=SCRIB PE=1 SV=5	Protein scribble homolog	SCRIB	74.95	3417.6	1.4	1323	1355	S26:Phosphorylation (STY):41.57	S1348	TPGPAASPEQLSF	7639.49	32179.4
Q9NWH9	Q9NWH9|SLTM_HUMAN	S	DGQDAIAQS(+79.97)PEK	9	12	SAFB-like transcription modulator OS=Homo sapiens OX=9606 GN=SLTM PE=1 SV=2	SAFB-like transcription modulator	SLTM	63.86	1337.55	3.8	281	292		S289	QDAIAQSPEKESK	30796.5	129899
Q9NQ92	Q9NQ92|COPRS_HUMAN	S	GTQSIPNDS(+79.97)PAR	9	12	Coordinator of PRMT5 and differentiation stimulator OS=Homo sapiens OX=9606 GN=COPRS PE=1 SV=3	Coordinator of PRMT5 and differentiation stimulator	COPRS	47.52	1321.57	-1.3	58	69	S9:Phosphorylation (STY):68.60	S66	QSIPNDSPARGEG	28819.8	122492
Q8N5D0	Q8N5D0|WDTC1_HUMAN	S	KDS(+79.97)ISEDEMVLR	3	12	WD and tetratricopeptide repeats protein 1 OS=Homo sapiens OX=9606 GN=WDTC1 PE=1 SV=2	WD and tetratricopeptide repeats protein 1	WDTC1	57.8	1500.65	-0.5	509	520	S3:Phosphorylation (STY):25.66	S511	STSRKDSISEDEM	3043.7	12980.8
O94880	O94880|PHF14_HUMAN	S	NS(+79.97)ADDEELTNDSLTLSQSK	2	19	PHD finger protein 14 OS=Homo sapiens OX=9606 GN=PHF14 PE=1 SV=3	PHD finger protein 14	PHF14	68.83	2145.89	0.9	279	297	S2:Phosphorylation (STY):72.07	S280	KVLSRNSADDEEL	1956.09	8345.79
P22626	P22626|ROA2_HUMAN	S	NMGGPYGGGNYGPGGS(+79.97)GGSGGYGGR	16	25	Heterogeneous nuclear ribonucleoproteins A2/B1 OS=Homo sapiens OX=9606 GN=HNRNPA2B1 PE=1 SV=2	Heterogeneous nuclear ribonucleoproteins A2/B1	HNRNPA2B1	65.73	2268.86	2	326	350	S16:Phosphorylation (STY):19.05	S341	NYGPGGSGGSGGY	7584.85	32400.1
Q8IWI9	Q8IWI9|MGAP_HUMAN	S	QLAEPAS(+79.97)EPDVLK	7	13	MAX gene-associated protein OS=Homo sapiens OX=9606 GN=MGA PE=1 SV=4	MAX gene-associated protein	MGA	41.61	1475.69	1.7	2915	2927		S2921	QLAEPASEPDVLK	43.3423	185.613
P24928	P24928|RPB1_HUMAN	S	YS(+79.97)PTSPTYSPTTPK	2	14	DNA-directed RNA polymerase II subunit RPB1 OS=Homo sapiens OX=9606 GN=POLR2A PE=1 SV=2	DNA-directed RNA polymerase II subunit RPB1	POLR2A	57.97	1605.7	-1.4	1874	1887	S2:Phosphorylation (STY):8.14	S1875	PTSPKYSPTSPTY	2869.93	12315.1
Q14978	Q14978|NOLC1_HUMAN	S	ASSS(+79.97)DSEDSSEEEEEVQGPPAK	4	22	Nucleolar and coiled-body phosphoprotein 1 OS=Homo sapiens OX=9606 GN=NOLC1 PE=1 SV=2	Nucleolar and coiled-body phosphoprotein 1	NOLC1	90.98	2372.9	1.1	82	103	S4:Phosphorylation (STY):0.00	S85	KKKASSSDSEDSS	4744.54	20402.5
Q8N4C8	Q8N4C8|MINK1_HUMAN	T	QNSDPT(+79.97)SEGPGPSPNPPAWVRPDNEAPPK	6	29	Misshapen-like kinase 1 OS=Homo sapiens OX=9606 GN=MINK1 PE=1 SV=2	Misshapen-like kinase 1	MINK1	27.68	3117.38	-1.1	639	667	T6:Phosphorylation (STY):0.00	T644	RQNSDPTSEGPGP	4481.69	19282.2
Q6PJT7	Q6PJT7|ZC3HE_HUMAN	S	FIVTLDGVPS(+79.97)PPGY(+79.97)MSDQEEDMC(+57.02)FEGMKPVNQTAASNK	10	38	Zinc finger CCCH domain-containing protein 14 OS=Homo sapiens OX=9606 GN=ZC3H14 PE=1 SV=1	Zinc finger CCCH domain-containing protein 14	ZC3H14	47.14	4348.81	0.7	518	555	S10:Phosphorylation (STY):6.67;Y14:Phosphorylation (STY):0.00;C23:Carbamidomethylation:1000.00	S527	TLDGVPSPPGYMS	5352.47	23086.5
Q6PJT7	Q6PJT7|ZC3HE_HUMAN	Y	FIVTLDGVPS(+79.97)PPGY(+79.97)MSDQEEDMC(+57.02)FEGMKPVNQTAASNK	14	38	Zinc finger CCCH domain-containing protein 14 OS=Homo sapiens OX=9606 GN=ZC3H14 PE=1 SV=1	Zinc finger CCCH domain-containing protein 14	ZC3H14	47.14	4348.81	0.7	518	555	S10:Phosphorylation (STY):6.67;Y14:Phosphorylation (STY):0.00;C23:Carbamidomethylation:1000.00	Y531	VPSPPGYMSDQEE	5352.47	23086.5
Q5T8D3	Q8NEF9|SRFB1_HUMAN:Q5T8D3|ACBD5_HUMAN	S	AESSDS(+79.97)GAES(+79.97)EEEEAQEEVK	6	20	Acyl-CoA-binding domain-containing protein 5 OS=Homo sapiens OX=9606 GN=ACBD5 PE=1 SV=1	Acyl-CoA-binding domain-containing protein 5	ACBD5	73.5	2298.79	0.6	191	210	S6:Phosphorylation (STY):11.10;S10:Phosphorylation (STY):45.03	S196	KAESSDSGAESEE	4387.29	19112.8
Q5T8D3	Q8NEF9|SRFB1_HUMAN:Q5T8D3|ACBD5_HUMAN	S	AESSDS(+79.97)GAES(+79.97)EEEEAQEEVK	10	20	Acyl-CoA-binding domain-containing protein 5 OS=Homo sapiens OX=9606 GN=ACBD5 PE=1 SV=1	Acyl-CoA-binding domain-containing protein 5	ACBD5	73.5	2298.79	0.6	191	210	S6:Phosphorylation (STY):11.10;S10:Phosphorylation (STY):45.03	S200	SDSGAESEEEEAQ	4387.29	19112.8
P49792	P49792|RBP2_HUMAN	S	HSTPS(+79.97)PTR	5	8	E3 SUMO-protein ligase RanBP2 OS=Homo sapiens OX=9606 GN=RANBP2 PE=1 SV=2	E3 SUMO-protein ligase RanBP2	RANBP2	59.39	961.402	-1.9	777	784	S5:Phosphorylation (STY):22.85	S781	IKHSTPSPTRYSL	31166.1	135801
Q9H6T3	Q9H6T3|RPAP3_HUMAN	T	ILDELDKDDST(+79.97)HES(+79.97)LSQESES(+79.97)EEDGIHVDSQK	11	32	RNA polymerase II-associated protein 3 OS=Homo sapiens OX=9606 GN=RPAP3 PE=1 SV=2	RNA polymerase II-associated protein 3	RPAP3	25.08	3853.5	-0.1	101	132	T11:Phosphorylation (STY):0.00;S14:Phosphorylation (STY):0.00;S21:Phosphorylation (STY):0.00	T111	LDKDDSTHESLSQ	17573.6	77348.3
Q9H6T3	Q9H6T3|RPAP3_HUMAN	S	ILDELDKDDST(+79.97)HES(+79.97)LSQESES(+79.97)EEDGIHVDSQK	14	32	RNA polymerase II-associated protein 3 OS=Homo sapiens OX=9606 GN=RPAP3 PE=1 SV=2	RNA polymerase II-associated protein 3	RPAP3	25.08	3853.5	-0.1	101	132	T11:Phosphorylation (STY):0.00;S14:Phosphorylation (STY):0.00;S21:Phosphorylation (STY):0.00	S114	DDSTHESLSQESE	17573.6	77348.3
Q9H6T3	Q9H6T3|RPAP3_HUMAN	S	ILDELDKDDST(+79.97)HES(+79.97)LSQESES(+79.97)EEDGIHVDSQK	21	32	RNA polymerase II-associated protein 3 OS=Homo sapiens OX=9606 GN=RPAP3 PE=1 SV=2	RNA polymerase II-associated protein 3	RPAP3	25.08	3853.5	-0.1	101	132	T11:Phosphorylation (STY):0.00;S14:Phosphorylation (STY):0.00;S21:Phosphorylation (STY):0.00	S121	LSQESESEEDGIH	17573.6	77348.3
Q14160	Q14160|SCRIB_HUMAN	S	MAESPC(+57.02)SPSGQQPPSPPS(+79.97)PDELPANVK	18	27	Protein scribble homolog OS=Homo sapiens OX=9606 GN=SCRIB PE=1 SV=5	Protein scribble homolog	SCRIB	76.65	2883.25	-0.7	1292	1318	C6:Carbamidomethylation:1000.00;S18:Phosphorylation (STY):22.45	S1309	QPPSPPSPDELPA	4380.27	19388.5
Q3V6T2	Q3V6T2|GRDN_HUMAN	S	DTTSFEDIS(+79.97)PQGVSDDSSTGSR	9	22	Girdin OS=Homo sapiens OX=9606 GN=CCDC88A PE=1 SV=2	Girdin	CCDC88A	62.31	2366.94	-0.4	1558	1579	S9:Phosphorylation (STY):38.64	S1566	TSFEDISPQGVSD	1834.33	8185.73
A6NGR9	A6NGR9|MROH6_HUMAN	S	LARS(+79.97)PC(+57.02)SPDMPK	4	12	Maestro heat-like repeat-containing protein family member 6 OS=Homo sapiens OX=9606 GN=MROH6 PE=4 SV=2	Maestro heat-like repeat-containing protein family member 6	MROH6	20.21	1437.61	11.7	276	287	S4:Phosphorylation (STY):10.22;C6:Carbamidomethylation:1000.00	S279	LHKLARSPCSPDM	1328.84	5996.68
Q06587	Q06587|RING1_HUMAN	S	RPIPGSDQTTTMSGGEGEPGEGEGDGEDVS(+79.97)SDSAPDSAPGPAPK	30	44	E3 ubiquitin-protein ligase RING1 OS=Homo sapiens OX=9606 GN=RING1 PE=1 SV=2	E3 ubiquitin-protein ligase RING1	RING1	44.51	4304.78	-5.1	158	201	S30:Phosphorylation (STY):0.00	S187	GDGEDVSSDSAPD	3074.81	13937.6
Q5H9R7	Q5H9R7|PP6R3_HUMAN	T	NTVDLVT(+79.97)T(+79.97)C(+57.02)HIHSS(+79.97)SDDEIDFK	7	22	Serine/threonine-protein phosphatase 6 regulatory subunit 3 OS=Homo sapiens OX=9606 GN=PPP6R3 PE=1 SV=2	Serine/threonine-protein phosphatase 6 regulatory subunit 3	PPP6R3	49.45	2772.04	-1.1	511	532	T7:Phosphorylation (STY):0.00;T8:Phosphorylation (STY):0.00;C9:Carbamidomethylation:1000.00;S14:Phosphorylation (STY):0.00	T517	NTVDLVTTCHIHS	1630.91	7397.94
Q5H9R7	Q5H9R7|PP6R3_HUMAN	T	NTVDLVT(+79.97)T(+79.97)C(+57.02)HIHSS(+79.97)SDDEIDFK	8	22	Serine/threonine-protein phosphatase 6 regulatory subunit 3 OS=Homo sapiens OX=9606 GN=PPP6R3 PE=1 SV=2	Serine/threonine-protein phosphatase 6 regulatory subunit 3	PPP6R3	49.45	2772.04	-1.1	511	532	T7:Phosphorylation (STY):0.00;T8:Phosphorylation (STY):0.00;C9:Carbamidomethylation:1000.00;S14:Phosphorylation (STY):0.00	T518	TVDLVTTCHIHSS	1630.91	7397.94
Q5H9R7	Q5H9R7|PP6R3_HUMAN	S	NTVDLVT(+79.97)T(+79.97)C(+57.02)HIHSS(+79.97)SDDEIDFK	14	22	Serine/threonine-protein phosphatase 6 regulatory subunit 3 OS=Homo sapiens OX=9606 GN=PPP6R3 PE=1 SV=2	Serine/threonine-protein phosphatase 6 regulatory subunit 3	PPP6R3	49.45	2772.04	-1.1	511	532	T7:Phosphorylation (STY):0.00;T8:Phosphorylation (STY):0.00;C9:Carbamidomethylation:1000.00;S14:Phosphorylation (STY):0.00	S524	TCHIHSSSDDEID	1630.91	7397.94
O75822	O75822|EIF3J_HUMAN	S	A(+42.01)AAAAAAGDSDS(+79.97)WDADAFSVED	12	22	Eukaryotic translation initiation factor 3 subunit J OS=Homo sapiens OX=9606 GN=EIF3J PE=1 SV=2	Eukaryotic translation initiation factor 3 subunit J	EIF3J	49.39	2233.83	0.1	2	23	A1:Acetylation (Protein N-term):1000.00;S12:Phosphorylation (STY):0.00	S13	AAGDSDSWDADAF	34.7848	157.896
Q3KQU3	Q3KQU3|MA7D1_HUMAN	S	SSQPS(+79.97)PTAVPASDS(+79.97)PPTK	5	18	MAP7 domain-containing protein 1 OS=Homo sapiens OX=9606 GN=MAP7D1 PE=1 SV=1	MAP7 domain-containing protein 1	MAP7D1	63.09	1912.79	0.3	112	129	S5:Phosphorylation (STY):30.83;S14:Phosphorylation (STY):13.38	S116	RRSSQPSPTAVPA	9752.53	44274
Q3KQU3	Q3KQU3|MA7D1_HUMAN	S	SSQPS(+79.97)PTAVPASDS(+79.97)PPTK	14	18	MAP7 domain-containing protein 1 OS=Homo sapiens OX=9606 GN=MAP7D1 PE=1 SV=1	MAP7 domain-containing protein 1	MAP7D1	63.09	1912.79	0.3	112	129	S5:Phosphorylation (STY):30.83;S14:Phosphorylation (STY):13.38	S125	AVPASDSPPTKQE	9752.53	44274
Q9UQ35	Q9UQ35|SRRM2_HUMAN	T	DGSGT(+79.97)PSRHS(+79.97)LSGSS(+79.97)PGMK	5	19	Serine/arginine repetitive matrix protein 2 OS=Homo sapiens OX=9606 GN=SRRM2 PE=1 SV=2	Serine/arginine repetitive matrix protein 2	SRRM2	38.56	2083.75	0.7	1449	1467	T5:Phosphorylation (STY):0.00;S10:Phosphorylation (STY):0.00;S15:Phosphorylation (STY):14.02	T1453	LRDGSGTPSRHSL	10876.9	49640.1
Q9UQ35	Q9UQ35|SRRM2_HUMAN	S	DGSGT(+79.97)PSRHS(+79.97)LSGSS(+79.97)PGMK	10	19	Serine/arginine repetitive matrix protein 2 OS=Homo sapiens OX=9606 GN=SRRM2 PE=1 SV=2	Serine/arginine repetitive matrix protein 2	SRRM2	38.56	2083.75	0.7	1449	1467	T5:Phosphorylation (STY):0.00;S10:Phosphorylation (STY):0.00;S15:Phosphorylation (STY):14.02	S1458	GTPSRHSLSGSSP	10876.9	49640.1
Q9UQ35	Q9UQ35|SRRM2_HUMAN	S	DGSGT(+79.97)PSRHS(+79.97)LSGSS(+79.97)PGMK	15	19	Serine/arginine repetitive matrix protein 2 OS=Homo sapiens OX=9606 GN=SRRM2 PE=1 SV=2	Serine/arginine repetitive matrix protein 2	SRRM2	38.56	2083.75	0.7	1449	1467	T5:Phosphorylation (STY):0.00;S10:Phosphorylation (STY):0.00;S15:Phosphorylation (STY):14.02	S1463	HSLSGSSPGMKDI	10876.9	49640.1
Q8NEM2	Q8NEM2|SHCBP_HUMAN	S	GLFQDEDSC(+57.02)S(+79.97)DC(+57.02)SYR	10	15	SHC SH2 domain-binding protein 1 OS=Homo sapiens OX=9606 GN=SHCBP1 PE=1 SV=3	SHC SH2 domain-binding protein 1	SHCBP1	73.07	1917.65	-1	35	49	C9:Carbamidomethylation:1000.00;S10:Phosphorylation (STY):32.28;C12:Carbamidomethylation:1000.00	S44	QDEDSCSDCSYRD	1331.63	6083.75
P46821	P46821|MAP1B_HUMAN	S	TATC(+57.02)HSS(+79.97)SSPPIDAASAEPYGFR	7	23	Microtubule-associated protein 1B OS=Homo sapiens OX=9606 GN=MAP1B PE=1 SV=2	Microtubule-associated protein 1B	MAP1B	84.59	2488.04	-8.6	1811	1833	C4:Carbamidomethylation:1000.00;S7:Phosphorylation (STY):0.00	S1817	TATCHSSSSPPID	271487	1.24415e+06
Q13523	Q13523|PRP4B_HUMAN	Y	VQSGMGLILQGY(+79.97)ESGSEEEGEIHEK	12	25	Serine/threonine-protein kinase PRP4 homolog OS=Homo sapiens OX=9606 GN=PRPF4B PE=1 SV=3	Serine/threonine-protein kinase PRP4 homolog	PRPF4B	57.32	2785.22	-1.6	129	153	Y12:Phosphorylation (STY):0.00	Y140	GLILQGYESGSEE	1794.46	8227.41
Q9Y3D3	Q9Y3D3|RT16_HUMAN	T	TDAEAT(+79.97)DTEATET	6	13	28S ribosomal protein S16, mitochondrial OS=Homo sapiens OX=9606 GN=MRPS16 PE=1 SV=1	28S ribosomal protein S16, mitochondrial	MRPS16	43.88	1433.51	-1.8	125	137	T6:Phosphorylation (STY):0.00	T130	KTDAEATDTEATE	1255.81	5780.04
O14974	O14974|MYPT1_HUMAN	S	STGVSFWTQDS(+79.97)DENEQEQQSDT(+79.97)EEGSNKK	11	29	Protein phosphatase 1 regulatory subunit 12A OS=Homo sapiens OX=9606 GN=PPP1R12A PE=1 SV=1	Protein phosphatase 1 regulatory subunit 12A	PPP1R12A	30.2	3449.31	1.8	852	880	S11:Phosphorylation (STY):0.00;T22:Phosphorylation (STY):0.00	S862	SFWTQDSDENEQE	3843.39	17724.5
O14974	O14974|MYPT1_HUMAN	T	STGVSFWTQDS(+79.97)DENEQEQQSDT(+79.97)EEGSNKK	22	29	Protein phosphatase 1 regulatory subunit 12A OS=Homo sapiens OX=9606 GN=PPP1R12A PE=1 SV=1	Protein phosphatase 1 regulatory subunit 12A	PPP1R12A	30.2	3449.31	1.8	852	880	S11:Phosphorylation (STY):0.00;T22:Phosphorylation (STY):0.00	T873	QEQQSDTEEGSNK	3843.39	17724.5
Q05209	Q05209|PTN12_HUMAN	S	EEILQPPEPHPVPPILTPSPPS(+79.97)AFPTVTTVWQDNDR	22	36	Tyrosine-protein phosphatase non-receptor type 12 OS=Homo sapiens OX=9606 GN=PTPN12 PE=1 SV=3	Tyrosine-protein phosphatase non-receptor type 12	PTPN12	59.47	4080.99	1	351	386	S22:Phosphorylation (STY):0.00	S372	LTPSPPSAFPTVT	32638.6	150850
Q9BRZ2	Q9BRZ2|TRI56_HUMAN	S	RFS(+79.97)LNGDYK	3	9	E3 ubiquitin-protein ligase TRIM56 OS=Homo sapiens OX=9606 GN=TRIM56 PE=1 SV=3	E3 ubiquitin-protein ligase TRIM56	TRIM56	21.88	1178.51	3.9	533	541	S3:Phosphorylation (STY):23.70	S535	RALKRFSLNGDYK	11424.3	52981.8
P07910	P07910|HNRPC_HUMAN	S	NDKSEEEQSSSS(+79.97)VK	12	14	Heterogeneous nuclear ribonucleoproteins C1/C2 OS=Homo sapiens OX=9606 GN=HNRNPC PE=1 SV=4	Heterogeneous nuclear ribonucleoproteins C1/C2	HNRNPC	63.01	1632.65	2.2	230	243	S12:Phosphorylation (STY):24.44	S241	EEQSSSSVKKDET	6166.47	28636.6
Q9C0D7	Q9C0D7|ZC12C_HUMAN	T	EASEENASSGDSEENT(+79.97)NSDHESEQLGSISVEPGLITK	16	37	Probable ribonuclease ZC3H12C OS=Homo sapiens OX=9606 GN=ZC3H12C PE=1 SV=2	Probable ribonuclease ZC3H12C	ZC3H12C	22.97	3955.66	-2.2	79	115	T16:Phosphorylation (STY):0.00	T94	GDSEENTNSDHES	1403.54	6530.24
Q96RK0	Q96RK0|CIC_HUMAN	S	AQS(+79.97)VSPVQAPPPGGSAQLLPGK	3	22	Protein capicua homolog OS=Homo sapiens OX=9606 GN=CIC PE=1 SV=2	Protein capicua homolog	CIC	65.74	2165.09	-0.4	900	921	S3:Phosphorylation (STY):0.00	S902	PPPKAQSVSPVQA	8017.41	37539.1
Q8N3F8	Q8N3F8|MILK1_HUMAN	S	KKPAPLPPS(+79.97)SSPGPPSQDSR	9	20	MICAL-like protein 1 OS=Homo sapiens OX=9606 GN=MICALL1 PE=1 SV=2	MICAL-like protein 1	MICALL1	49.84	2109.03	-2.1	381	400	S9:Phosphorylation (STY):0.00	S389	PAPLPPSSSPGPP	3120.79	14655.5
Q9P1Y6	Q9P1Y6|PHRF1_HUMAN	T	SEVYDPSDPT(+79.97)GSDSSAPGS(+79.97)S(+79.97)PER	10	23	PHD and RING finger domain-containing protein 1 OS=Homo sapiens OX=9606 GN=PHRF1 PE=1 SV=3	PHD and RING finger domain-containing protein 1	PHRF1	39.15	2562.87	-0.9	827	849	T10:Phosphorylation (STY):0.00;S19:Phosphorylation (STY):20.76;S20:Phosphorylation (STY):19.61	T836	YDPSDPTGSDSSA	3763.77	17703.7
Q9P1Y6	Q9P1Y6|PHRF1_HUMAN	S	SEVYDPSDPT(+79.97)GSDSSAPGS(+79.97)S(+79.97)PER	19	23	PHD and RING finger domain-containing protein 1 OS=Homo sapiens OX=9606 GN=PHRF1 PE=1 SV=3	PHD and RING finger domain-containing protein 1	PHRF1	39.15	2562.87	-0.9	827	849	T10:Phosphorylation (STY):0.00;S19:Phosphorylation (STY):20.76;S20:Phosphorylation (STY):19.61	S845	DSSAPGSSPERSG	3763.77	17703.7
Q9P1Y6	Q9P1Y6|PHRF1_HUMAN	S	SEVYDPSDPT(+79.97)GSDSSAPGS(+79.97)S(+79.97)PER	20	23	PHD and RING finger domain-containing protein 1 OS=Homo sapiens OX=9606 GN=PHRF1 PE=1 SV=3	PHD and RING finger domain-containing protein 1	PHRF1	39.15	2562.87	-0.9	827	849	T10:Phosphorylation (STY):0.00;S19:Phosphorylation (STY):20.76;S20:Phosphorylation (STY):19.61	S846	SSAPGSSPERSGP	3763.77	17703.7
P25205	P25205|MCM3_HUMAN	S	DGDS(+79.97)YDPYDFSDTEEEMPQVHTPK	4	24	DNA replication licensing factor MCM3 OS=Homo sapiens OX=9606 GN=MCM3 PE=1 SV=3	DNA replication licensing factor MCM3	MCM3	67.58	2881.09	-1.9	701	724	S4:Phosphorylation (STY):8.69	S704	DAKDGDSYDPYDF	1581.59	7464.86
Q9NR30	Q9NR30|DDX21_HUMAN	S	NGFPHPEPDC(+57.02)NPSEAASEES(+79.97)NS(+79.97)EIEQEIPVEQK	20	33	Nucleolar RNA helicase 2 OS=Homo sapiens OX=9606 GN=DDX21 PE=1 SV=5	Nucleolar RNA helicase 2	DDX21	85.55	3853.53	2.6	152	184	C10:Carbamidomethylation:1000.00;S20:Phosphorylation (STY):0.00;S22:Phosphorylation (STY):7.38	S171	EAASEESNSEIEQ	9830.69	46453.3
Q9NR30	Q9NR30|DDX21_HUMAN	S	NGFPHPEPDC(+57.02)NPSEAASEES(+79.97)NS(+79.97)EIEQEIPVEQK	22	33	Nucleolar RNA helicase 2 OS=Homo sapiens OX=9606 GN=DDX21 PE=1 SV=5	Nucleolar RNA helicase 2	DDX21	85.55	3853.53	2.6	152	184	C10:Carbamidomethylation:1000.00;S20:Phosphorylation (STY):0.00;S22:Phosphorylation (STY):7.38	S173	ASEESNSEIEQEI	9830.69	46453.3
P45973	P45973|CBX5_HUMAN	S	TADS(+79.97)S(+79.97)S(+79.97)SEDEEEYVVEK	4	17	Chromobox protein homolog 5 OS=Homo sapiens OX=9606 GN=CBX5 PE=1 SV=1	Chromobox protein homolog 5	CBX5	75.21	2142.68	0.9	8	24	S4:Phosphorylation (STY):9.42;S5:Phosphorylation (STY):11.01;S6:Phosphorylation (STY):24.44	S11	TKRTADSSSSEDE	15860.6	74971
P45973	P45973|CBX5_HUMAN	S	TADS(+79.97)S(+79.97)S(+79.97)SEDEEEYVVEK	5	17	Chromobox protein homolog 5 OS=Homo sapiens OX=9606 GN=CBX5 PE=1 SV=1	Chromobox protein homolog 5	CBX5	75.21	2142.68	0.9	8	24	S4:Phosphorylation (STY):9.42;S5:Phosphorylation (STY):11.01;S6:Phosphorylation (STY):24.44	S12	KRTADSSSSEDEE	15860.6	74971
P45973	P45973|CBX5_HUMAN	S	TADS(+79.97)S(+79.97)S(+79.97)SEDEEEYVVEK	6	17	Chromobox protein homolog 5 OS=Homo sapiens OX=9606 GN=CBX5 PE=1 SV=1	Chromobox protein homolog 5	CBX5	75.21	2142.68	0.9	8	24	S4:Phosphorylation (STY):9.42;S5:Phosphorylation (STY):11.01;S6:Phosphorylation (STY):24.44	S13	RTADSSSSEDEEE	15860.6	74971
Q8WVC0	Q8WVC0|LEO1_HUMAN	S	ELFGDDS(+79.97)EDEGAS(+79.97)HHSGSDNHS(+79.97)ER	7	24	RNA polymerase-associated protein LEO1 OS=Homo sapiens OX=9606 GN=LEO1 PE=1 SV=1	RNA polymerase-associated protein LEO1	LEO1	41.86	2852.92	-2.6	60	83	S7:Phosphorylation (STY):0.00;S13:Phosphorylation (STY):0.00;S22:Phosphorylation (STY):0.00	S66	ELFGDDSEDEGAS	947.737	4496.22
Q8WVC0	Q8WVC0|LEO1_HUMAN	S	ELFGDDS(+79.97)EDEGAS(+79.97)HHSGSDNHS(+79.97)ER	13	24	RNA polymerase-associated protein LEO1 OS=Homo sapiens OX=9606 GN=LEO1 PE=1 SV=1	RNA polymerase-associated protein LEO1	LEO1	41.86	2852.92	-2.6	60	83	S7:Phosphorylation (STY):0.00;S13:Phosphorylation (STY):0.00;S22:Phosphorylation (STY):0.00	S72	SEDEGASHHSGSD	947.737	4496.22
Q8WVC0	Q8WVC0|LEO1_HUMAN	S	ELFGDDS(+79.97)EDEGAS(+79.97)HHSGSDNHS(+79.97)ER	22	24	RNA polymerase-associated protein LEO1 OS=Homo sapiens OX=9606 GN=LEO1 PE=1 SV=1	RNA polymerase-associated protein LEO1	LEO1	41.86	2852.92	-2.6	60	83	S7:Phosphorylation (STY):0.00;S13:Phosphorylation (STY):0.00;S22:Phosphorylation (STY):0.00	S81	SGSDNHSERSDNR	947.737	4496.22
O43379	O43379|WDR62_HUMAN	T	HHFET(+79.97)LTESPC(+57.02)R	5	12	WD repeat-containing protein 62 OS=Homo sapiens OX=9606 GN=WDR62 PE=1 SV=4	WD repeat-containing protein 62	WDR62	40.91	1592.64	0.4	1062	1073	T5:Phosphorylation (STY):11.59;C11:Carbamidomethylation:1000.00	T1066	LRHHFETLTESPC	3168.04	15030.6
P55199	P55199|ELL_HUMAN	S	LC(+57.02)QPQSTGSLLGDPAAS(+79.97)SPPGER	17	23	RNA polymerase II elongation factor ELL OS=Homo sapiens OX=9606 GN=ELL PE=1 SV=1	RNA polymerase II elongation factor ELL	ELL	56.51	2404.07	0.4	292	314	C2:Carbamidomethylation:1000.00;S17:Phosphorylation (STY):0.00	S308	LGDPAASSPPGER	8536.16	40523.4
Q96JM7	Q96JM7|LMBL3_HUMAN	S	TDANESSSS(+79.97)PEIR	9	13	Lethal(3)malignant brain tumor-like protein 3 OS=Homo sapiens OX=9606 GN=L3MBTL3 PE=1 SV=2	Lethal(3)malignant brain tumor-like protein 3	L3MBTL3	57.86	1471.58	-3.5	617	629	S9:Phosphorylation (STY):0.00	S625	ANESSSSPEIRDQ	6530.99	31065
Q96N67	Q96N67|DOCK7_HUMAN	S	S(+79.97)LSNS(+79.97)NPDISGTPTSPDDEVR	1	21	Dedicator of cytokinesis protein 7 OS=Homo sapiens OX=9606 GN=DOCK7 PE=1 SV=4	Dedicator of cytokinesis protein 7	DOCK7	64.73	2346.93	1.1	896	916	S1:Phosphorylation (STY):5.03;S5:Phosphorylation (STY):5.03	S896	NLNRSRSLSNSNP	2955.94	14087.4
Q96N67	Q96N67|DOCK7_HUMAN	S	S(+79.97)LSNS(+79.97)NPDISGTPTSPDDEVR	5	21	Dedicator of cytokinesis protein 7 OS=Homo sapiens OX=9606 GN=DOCK7 PE=1 SV=4	Dedicator of cytokinesis protein 7	DOCK7	64.73	2346.93	1.1	896	916	S1:Phosphorylation (STY):5.03;S5:Phosphorylation (STY):5.03	S900	SRSLSNSNPDISG	2955.94	14087.4
O00221	O00221|IKBE_HUMAN	S	SLPESTSAPAS(+79.97)GPSDGSPQPC(+57.02)THPPGPVK	11	29	NF-kappa-B inhibitor epsilon OS=Homo sapiens OX=9606 GN=NFKBIE PE=1 SV=3	NF-kappa-B inhibitor epsilon	NFKBIE	52.22	2921.29	-0.5	167	195	S11:Phosphorylation (STY):0.00;C21:Carbamidomethylation:1000.00	S177	STSAPASGPSDGS	1500.55	7163.76
P19338	P19338|NUCL_HUMAN	S	KEDS(+79.97)DEEEDDDS(+79.97)EEDEEDDEDEDEDEDEIEPAAM(+15.99)K	4	35	Nucleolin OS=Homo sapiens OX=9606 GN=NCL PE=1 SV=3	Nucleolin	NCL	96.25	4294.36	1	142	176		S145	NAKKEDSDEEEDD	11220.7	53673.9
P19338	P19338|NUCL_HUMAN	S	KEDS(+79.97)DEEEDDDS(+79.97)EEDEEDDEDEDEDEDEIEPAAM(+15.99)K	12	35	Nucleolin OS=Homo sapiens OX=9606 GN=NCL PE=1 SV=3	Nucleolin	NCL	96.25	4294.36	1	142	176		S153	EEEDDDSEEDEED	11220.7	53673.9
Q14C86	Q14C86|GAPD1_HUMAN	S	ELPPAAAIGATSLVAAPHSSSSS(+79.97)PSK	23	26	GTPase-activating protein and VPS9 domain-containing protein 1 OS=Homo sapiens OX=9606 GN=GAPVD1 PE=1 SV=2	GTPase-activating protein and VPS9 domain-containing protein 1	GAPVD1	62.53	2512.22	-0.3	928	953	S23:Phosphorylation (STY):8.26	S950	PHSSSSSPSKDSS	2943.69	14150.1
Q92879	Q92879|CELF1_HUMAN	S	TWS(+79.97)EKDLR	3	8	CUGBP Elav-like family member 1 OS=Homo sapiens OX=9606 GN=CELF1 PE=1 SV=2	CUGBP Elav-like family member 1	CELF1	27.85	1113.49	-2.3	26	33	S3:Phosphorylation (STY):11.10	S28	QVPRTWSEKDLRE	1726.52	8318.1
Q9P206	Q9P206|K1522_HUMAN	S	DQS(+79.97)PPPSPPPSY(+79.97)HPPPPPTK	3	20	Uncharacterized protein KIAA1522 OS=Homo sapiens OX=9606 GN=KIAA1522 PE=1 SV=2	Uncharacterized protein KIAA1522	KIAA1522	24.23	2278.97	-6.9	667	686	S3:Phosphorylation (STY):61.69;Y12:Phosphorylation (STY):0.00	S669	VISKDQSPPPSPP	6343.67	30567.1
Q9P206	Q9P206|K1522_HUMAN	Y	DQS(+79.97)PPPSPPPSY(+79.97)HPPPPPTK	12	20	Uncharacterized protein KIAA1522 OS=Homo sapiens OX=9606 GN=KIAA1522 PE=1 SV=2	Uncharacterized protein KIAA1522	KIAA1522	24.23	2278.97	-6.9	667	686	S3:Phosphorylation (STY):61.69;Y12:Phosphorylation (STY):0.00	Y678	PSPPPSYHPPPPP	6343.67	30567.1
P16104	P16104|H2AX_HUMAN	S	KTS(+79.97)ATVGPK	3	9	Histone H2AX OS=Homo sapiens OX=9606 GN=H2AX PE=1 SV=2	Histone H2AX	H2AX	41.54	967.474	-1.4	120	128	S3:Phosphorylation (STY):23.10	S122	LLPKKTSATVGPK	1260.71	6080.19
Q96RL1	Q96RL1|UIMC1_HUMAN:Q9C0C2|TB182_HUMAN	S	EMQSS(+79.97)FTR	5	8	BRCA1-A complex subunit RAP80 OS=Homo sapiens OX=9606 GN=UIMC1 PE=1 SV=2	BRCA1-A complex subunit RAP80	UIMC1	28.1	1064.4	-2.9	664	671	S5:Phosphorylation (STY):7.65	S668	SREMQSSFTRRDL	1271.59	6161.97
Q8IYU2	Q8IYU2|HACE1_HUMAN	T	RDST(+79.97)EITSILLK	4	12	E3 ubiquitin-protein ligase HACE1 OS=Homo sapiens OX=9606 GN=HACE1 PE=1 SV=2	E3 ubiquitin-protein ligase HACE1	HACE1	20.07	1454.74	0.2	383	394	T4:Phosphorylation (STY):0.00	T386	KNKRDSTEITSIL	1766.58	8563.16
Q96T23	Q96T23|RSF1_HUMAN	S	STLESEKPGS(+79.97)PEAAET(+79.97)SPPSNIIDHC(+57.02)EK	10	28	Remodeling and spacing factor 1 OS=Homo sapiens OX=9606 GN=RSF1 PE=1 SV=2	Remodeling and spacing factor 1	RSF1	53.17	3169.32	1.3	613	640	S10:Phosphorylation (STY):20.76;T16:Phosphorylation (STY):0.00;C26:Carbamidomethylation:1000.00	S622	ESEKPGSPEAAET	10236.3	49674.1
Q96T23	Q96T23|RSF1_HUMAN	T	STLESEKPGS(+79.97)PEAAET(+79.97)SPPSNIIDHC(+57.02)EK	16	28	Remodeling and spacing factor 1 OS=Homo sapiens OX=9606 GN=RSF1 PE=1 SV=2	Remodeling and spacing factor 1	RSF1	53.17	3169.32	1.3	613	640	S10:Phosphorylation (STY):20.76;T16:Phosphorylation (STY):0.00;C26:Carbamidomethylation:1000.00	T628	SPEAAETSPPSNI	10236.3	49674.1
Q13177	Q13177|PAK2_HUMAN	T	GTEAPAVVT(+79.97)EEEDDDEETAPPVIAPRPDHTK	9	31	Serine/threonine-protein kinase PAK 2 OS=Homo sapiens OX=9606 GN=PAK2 PE=1 SV=3	Serine/threonine-protein kinase PAK 2	PAK2	45.04	3394.51	2.6	161	191	T9:Phosphorylation (STY):1.73	T169	EAPAVVTEEEDDD	1447.87	7082.69
Q13177	Q13177|PAK2_HUMAN	T	GTEAPAVVTEEEDDDEET(+79.97)APPVIAPRPDHTK	18	31	Serine/threonine-protein kinase PAK 2 OS=Homo sapiens OX=9606 GN=PAK2 PE=1 SV=3	Serine/threonine-protein kinase PAK 2	PAK2	27.59	3394.51	-2.5	161	191	T18:Phosphorylation (STY):1.37	T178	EDDDEETAPPVIA	1447.87	7082.69
P82094	P82094|TMF1_HUMAN	S	DSSLC(+57.02)VSGETLAAGTS(+79.97)SPK	16	19	TATA element modulatory factor OS=Homo sapiens OX=9606 GN=TMF1 PE=1 SV=2	TATA element modulatory factor	TMF1	74	1945.83	2.3	154	172	C5:Carbamidomethylation:1000.00;S16:Phosphorylation (STY):0.00	S169	TLAAGTSSPKTEG	2685.34	13163.7
Q13541	Q13541|4EBP1_HUMAN	S	DLPTIPGVTSPS(+79.97)SDEPPMEASQSHLRNSPEDK	12	32	Eukaryotic translation initiation factor 4E-binding protein 1 OS=Homo sapiens OX=9606 GN=EIF4EBP1 PE=1 SV=3	Eukaryotic translation initiation factor 4E-binding protein 1	EIF4EBP1	31.62	3497.57	1.1	74	105	S12:Phosphorylation (STY):0.00	S85	PGVTSPSSDEPPM	3891.18	19096.2
P52701	P52701|MSH6_HUMAN	S	VISDSES(+79.97)DIGGSDVEFKPDTK	7	21	DNA mismatch repair protein Msh6 OS=Homo sapiens OX=9606 GN=MSH6 PE=1 SV=2	DNA mismatch repair protein Msh6	MSH6	50.83	2304	1.4	250	270	S7:Phosphorylation (STY):0.00	S256	VISDSESDIGGSD	34507.5	169749
Q86YS7	Q86YS7|C2CD5_HUMAN	S	EIPFNEDPNPNTHSSGPS(+79.97)T(+79.97)PLK	18	22	C2 domain-containing protein 5 OS=Homo sapiens OX=9606 GN=C2CD5 PE=1 SV=1	C2 domain-containing protein 5	C2CD5	24.21	2537.05	0.8	267	288	S18:Phosphorylation (STY):0.00;T19:Phosphorylation (STY):0.00	S284	THSSGPSTPLKNQ	45.6462	224.621
Q86YS7	Q86YS7|C2CD5_HUMAN	T	EIPFNEDPNPNTHSSGPS(+79.97)T(+79.97)PLK	19	22	C2 domain-containing protein 5 OS=Homo sapiens OX=9606 GN=C2CD5 PE=1 SV=1	C2 domain-containing protein 5	C2CD5	24.21	2537.05	0.8	267	288	S18:Phosphorylation (STY):0.00;T19:Phosphorylation (STY):0.00	T285	HSSGPSTPLKNQT	45.6462	224.621
P47974	P47974|TISD_HUMAN	S	SQQQQQQQGLAPPAQPPAPPSATLPAGAAAPPS(+79.97)PPFSFQLPR	33	42	mRNA decay activator protein ZFP36L2 OS=Homo sapiens OX=9606 GN=ZFP36L2 PE=1 SV=3	mRNA decay activator protein ZFP36L2	ZFP36L2	70.47	4336.14	4.6	394	435	S33:Phosphorylation (STY):11.12	S426	GAAAPPSPPFSFQ	2908.15	14320
Q9BRY0	Q9BRY0|S39A3_HUMAN	S	EKPSFIDLETFNAGS(+79.97)DVGSDSEYESPFMGGAR	15	32	Zinc transporter ZIP3 OS=Homo sapiens OX=9606 GN=SLC39A3 PE=1 SV=2	Zinc transporter ZIP3	SLC39A3	46.67	3518.49	-0.6	111	142	S15:Phosphorylation (STY):7.38	S125	ETFNAGSDVGSDS	953.388	4705.35
Q969E4	Q969E4|TCAL3_HUMAN	S	NEGNLENEGKPEDEVEPDDEGKS(+79.97)DEEEKPDVEGK	23	34	Transcription elongation factor A protein-like 3 OS=Homo sapiens OX=9606 GN=TCEAL3 PE=1 SV=1	Transcription elongation factor A protein-like 3	TCEAL3	91.31	3864.59	2.4	8	41		S30	PDDEGKSDEEEKP	62584.9	309386
P62995	P62995|TRA2B_HUMAN	S	RHS(+79.97)HSHS(+79.97)PMSTR	3	12	Transformer-2 protein homolog beta OS=Homo sapiens OX=9606 GN=TRA2B PE=1 SV=1	Transformer-2 protein homolog beta	TRA2B	52.67	1578.59	-1.3	93	104	S3:Phosphorylation (STY):22.87;S7:Phosphorylation (STY):40.21	S95	DYRRRHSHSHSPM	16134.6	79958.2
P62995	P62995|TRA2B_HUMAN	S	RHS(+79.97)HSHS(+79.97)PMSTR	7	12	Transformer-2 protein homolog beta OS=Homo sapiens OX=9606 GN=TRA2B PE=1 SV=1	Transformer-2 protein homolog beta	TRA2B	52.67	1578.59	-1.3	93	104	S3:Phosphorylation (STY):22.87;S7:Phosphorylation (STY):40.21	S99	RHSHSHSPMSTRR	16134.6	79958.2
Q14938	Q14938|NFIX_HUMAN:Q14160|SCRIB_HUMAN	S	S(+79.97)ITSPPSTSTTK	1	12	Nuclear factor 1 X-type OS=Homo sapiens OX=9606 GN=NFIX PE=1 SV=2	Nuclear factor 1 X-type	NFIX	42.69	1285.58	-2.1	265	276	S1:Phosphorylation (STY):32.28	S265	VTLGRRSITSPPS	2975.71	14827.6
Q86YS7	Q86YS7|C2CD5_HUMAN	S	EIPFNEDPNPNTHSS(+79.97)GPS(+79.97)TPLK	15	22	C2 domain-containing protein 5 OS=Homo sapiens OX=9606 GN=C2CD5 PE=1 SV=1	C2 domain-containing protein 5	C2CD5	28.66	2537.05	7.2	267	288	S15:Phosphorylation (STY):0.00;S18:Phosphorylation (STY):0.00	S281	NPNTHSSGPSTPL	28.7287	143.232
Q86YS7	Q86YS7|C2CD5_HUMAN	S	EIPFNEDPNPNTHSS(+79.97)GPS(+79.97)TPLK	18	22	C2 domain-containing protein 5 OS=Homo sapiens OX=9606 GN=C2CD5 PE=1 SV=1	C2 domain-containing protein 5	C2CD5	28.66	2537.05	7.2	267	288	S15:Phosphorylation (STY):0.00;S18:Phosphorylation (STY):0.00	S284	THSSGPSTPLKNQ	28.7287	143.232
Q8IYB3	Q8IYB3|SRRM1_HUMAN	S	KPPAPPS(+79.97)PVQS(+79.97)QS(+79.97)PSTNWSPAVPVK	7	25	Serine/arginine repetitive matrix protein 1 OS=Homo sapiens OX=9606 GN=SRRM1 PE=1 SV=2	Serine/arginine repetitive matrix protein 1	SRRM1	86.42	2822.25	0	763	787	S7:Phosphorylation (STY):97.31;S11:Phosphorylation (STY):42.89;S13:Phosphorylation (STY):22.85	S769	KPPAPPSPVQSQS	47628.2	238798
Q8IYB3	Q8IYB3|SRRM1_HUMAN	S	KPPAPPS(+79.97)PVQS(+79.97)QS(+79.97)PSTNWSPAVPVK	11	25	Serine/arginine repetitive matrix protein 1 OS=Homo sapiens OX=9606 GN=SRRM1 PE=1 SV=2	Serine/arginine repetitive matrix protein 1	SRRM1	86.42	2822.25	0	763	787	S7:Phosphorylation (STY):97.31;S11:Phosphorylation (STY):42.89;S13:Phosphorylation (STY):22.85	S773	PPSPVQSQSPSTN	47628.2	238798
Q8IYB3	Q8IYB3|SRRM1_HUMAN	S	KPPAPPS(+79.97)PVQS(+79.97)QS(+79.97)PSTNWSPAVPVK	13	25	Serine/arginine repetitive matrix protein 1 OS=Homo sapiens OX=9606 GN=SRRM1 PE=1 SV=2	Serine/arginine repetitive matrix protein 1	SRRM1	86.42	2822.25	0	763	787	S7:Phosphorylation (STY):97.31;S11:Phosphorylation (STY):42.89;S13:Phosphorylation (STY):22.85	S775	SPVQSQSPSTNWS	47628.2	238798
Q92610	Q92610|ZN592_HUMAN	S	HGLTSGSAS(+79.97)PPPPALPLYPDPVR	9	23	Zinc finger protein 592 OS=Homo sapiens OX=9606 GN=ZNF592 PE=1 SV=2	Zinc finger protein 592	ZNF592	74.17	2405.18	-1.9	683	705	S9:Phosphorylation (STY):27.16	S691	LTSGSASPPPPAL	7892.93	39915.9
Q8NFC6	Q8NFC6|BD1L1_HUMAN	S	EQES(+79.97)DEEEEEEEEDEPSGATTR	4	22	Biorientation of chromosomes in cell division protein 1-like 1 OS=Homo sapiens OX=9606 GN=BOD1L1 PE=1 SV=2	Biorientation of chromosomes in cell division protein 1-like 1	BOD1L1	73.61	2632.93	1.6	2983	3004	S4:Phosphorylation (STY):90.21	S2986	DKKEQESDEEEEE	3571.53	18068.3
P29966	P29966|MARCS_HUMAN	T	EAPAEGEAAEPGSPT(+79.97)AAEGEAASAASSTSS(+79.97)PK	15	32	Myristoylated alanine-rich C-kinase substrate OS=Homo sapiens OX=9606 GN=MARCKS PE=1 SV=4	Myristoylated alanine-rich C-kinase substrate	MARCKS	75.9	3074.23	-1.2	106	137	T15:Phosphorylation (STY):7.32;S30:Phosphorylation (STY):10.11	T120	AEPGSPTAAEGEA	1920.99	9739.59
P29966	P29966|MARCS_HUMAN	S	EAPAEGEAAEPGSPT(+79.97)AAEGEAASAASSTSS(+79.97)PK	30	32	Myristoylated alanine-rich C-kinase substrate OS=Homo sapiens OX=9606 GN=MARCKS PE=1 SV=4	Myristoylated alanine-rich C-kinase substrate	MARCKS	75.9	3074.23	-1.2	106	137	T15:Phosphorylation (STY):7.32;S30:Phosphorylation (STY):10.11	S135	AASSTSSPKAEDG	1920.99	9739.59
Q13586	Q13586|STIM1_HUMAN	S	LQLS(+79.97)GHAMPR	4	10	Stromal interaction molecule 1 OS=Homo sapiens OX=9606 GN=STIM1 PE=1 SV=3	Stromal interaction molecule 1	STIM1	43.33	1188.55	-5	157	166		S160	FRKLQLSGHAMPR	60.8129	310.739
Q9Y4J8	Q9Y4J8|DTNA_HUMAN	S	SS(+79.97)PSHTISRPIPMPIR	2	16	Dystrobrevin alpha OS=Homo sapiens OX=9606 GN=DTNA PE=1 SV=2	Dystrobrevin alpha	DTNA	46.11	1854.92	-3.8	563	578	S2:Phosphorylation (STY):0.00	S564	AGSPRSSPSHTIS	1939.08	9913.88
O43290	O43290|SNUT1_HUMAN	S	VENM(+15.99)DIS(+79.97)DEEEGGAPPPGS(+79.97)PQVLEEDEAELELQK	7	34	U4/U6.U5 tri-snRNP-associated protein 1 OS=Homo sapiens OX=9606 GN=SART1 PE=1 SV=1	U4/U6.U5 tri-snRNP-associated protein 1	SART1	60.93	3855.58	2.5	468	501		S474	VENMDISDEEEGG	1937.32	9916.67
O43290	O43290|SNUT1_HUMAN	S	VENM(+15.99)DIS(+79.97)DEEEGGAPPPGS(+79.97)PQVLEEDEAELELQK	19	34	U4/U6.U5 tri-snRNP-associated protein 1 OS=Homo sapiens OX=9606 GN=SART1 PE=1 SV=1	U4/U6.U5 tri-snRNP-associated protein 1	SART1	60.93	3855.58	2.5	468	501		S486	GAPPPGSPQVLEE	1937.32	9916.67
Q9NQ92	Q9NQ92|COPRS_HUMAN	T	GEGT(+79.97)HSEEEGFAMDEEDSDGELNTWELSEGTNC(+57.02)PPK	4	36	Coordinator of PRMT5 and differentiation stimulator OS=Homo sapiens OX=9606 GN=COPRS PE=1 SV=3	Coordinator of PRMT5 and differentiation stimulator	COPRS	42.02	4062.56	2.5	70	105	T4:Phosphorylation (STY):0.00;C33:Carbamidomethylation:1000.00	T73	PARGEGTHSEEEG	3742.55	19165.4
Q5T4S7	Q5T4S7|UBR4_HUMAN	S	AAPPPPPPPPPLESS(+79.97)PR	15	17	E3 ubiquitin-protein ligase UBR4 OS=Homo sapiens OX=9606 GN=UBR4 PE=1 SV=1	E3 ubiquitin-protein ligase UBR4	UBR4	61.09	1782.87	-0.8	606	622	S15:Phosphorylation (STY):9.34	S620	PPPLESSPRVKSP	14605.9	74952
P35606	P35606|COPB2_HUMAN	T	STAQQELDGKPASPTPVIVASHT(+79.97)ANKEEK	23	29	Coatomer subunit beta' OS=Homo sapiens OX=9606 GN=COPB2 PE=1 SV=2	Coatomer subunit beta'	COPB2	39.19	3112.51	1.9	847	875	T23:Phosphorylation (STY):11.10	T869	VIVASHTANKEEK	1662.47	8558.08
Q8WXG6	Q8WXG6|MADD_HUMAN	S	SSSSTTAS(+79.97)SSPSTVIHGANSEPADSTEMDDK	8	31	MAP kinase-activating death domain protein OS=Homo sapiens OX=9606 GN=MADD PE=1 SV=2	MAP kinase-activating death domain protein	MADD	32.96	3162.28	11.9	700	730	S8:Phosphorylation (STY):0.00	S707	SSSTTASSSPSTV	44.2161	227.993
Q92609	Q92609|TBCD5_HUMAN	S	SQAPVC(+57.02)SPLVFSDPLMGPASASSSNPS(+79.97)SSPDDDSSK	27	36	TBC1 domain family member 5 OS=Homo sapiens OX=9606 GN=TBC1D5 PE=1 SV=1	TBC1 domain family member 5	TBC1D5	69.76	3687.56	-1.9	748	783	C6:Carbamidomethylation:1000.00;S27:Phosphorylation (STY):0.00	S774	ASSSNPSSSPDDD	1475	7624.58
P08670	P08670|VIME_HUMAN	S	ISLPLPNFS(+79.97)SLNLR	9	14	Vimentin OS=Homo sapiens OX=9606 GN=VIM PE=1 SV=4	Vimentin	VIM	60.44	1649.85	2.5	411	424	S9:Phosphorylation (STY):9.34	S419	LPLPNFSSLNLRE	1139.87	5919.16
Q9NVM1	Q9NVM1|EVA1B_HUMAN	T	SST(+79.97)LEPEDDDEDEEDTVTR	3	19	Protein eva-1 homolog B OS=Homo sapiens OX=9606 GN=EVA1B PE=1 SV=1	Protein eva-1 homolog B	EVA1B	33.6	2260.84	-1.4	70	88	T3:Phosphorylation (STY):0.00	T72	RDPRSSTLEPEDD	2535.24	13165.8
Q8N1G2	Q8N1G2|CMTR1_HUMAN	S	ASTTS(+79.97)LSGSDS(+79.97)ETEGK	5	16	Cap-specific mRNA (nucleoside-2'-O-)-methyltransferase 1 OS=Homo sapiens OX=9606 GN=CMTR1 PE=1 SV=1	Cap-specific mRNA (nucleoside-2'-O-)-methyltransferase 1	CMTR1	27.9	1715.62	0.4	45	60	S5:Phosphorylation (STY):0.00;S11:Phosphorylation (STY):0.00	S49	AKASTTSLSGSDS	5105.14	26608
Q8N1G2	Q8N1G2|CMTR1_HUMAN	S	ASTTS(+79.97)LSGSDS(+79.97)ETEGK	11	16	Cap-specific mRNA (nucleoside-2'-O-)-methyltransferase 1 OS=Homo sapiens OX=9606 GN=CMTR1 PE=1 SV=1	Cap-specific mRNA (nucleoside-2'-O-)-methyltransferase 1	CMTR1	27.9	1715.62	0.4	45	60	S5:Phosphorylation (STY):0.00;S11:Phosphorylation (STY):0.00	S55	SLSGSDSETEGKQ	5105.14	26608
Q9H1B7	Q9H1B7|I2BPL_HUMAN	T	T(+79.97)TPPESAPQNGPSPMAALMSVADTLGTAHSPK	1	32	Probable E3 ubiquitin-protein ligase IRF2BPL OS=Homo sapiens OX=9606 GN=IRF2BPL PE=1 SV=1	Probable E3 ubiquitin-protein ligase IRF2BPL	IRF2BPL	71.41	3240.48	0.5	610	641	T1:Phosphorylation (STY):0.00	T610	GPHSNRTTPPESA	10502.1	54751.5
P78347	P78347|GTF2I_HUMAN	S	ETDGSS(+79.97)QIKQEPDPTW	6	16	General transcription factor II-I OS=Homo sapiens OX=9606 GN=GTF2I PE=1 SV=2	General transcription factor II-I	GTF2I	25.86	1896.78	2.7	983	998	S6:Phosphorylation (STY):2.76	S988	KETDGSSQIKQEP	40.855	213.629
O75822	O75822|EIF3J_HUMAN	S	A(+42.01)AAAAAAGDSDS(+79.97)WDADAFSVEDPVRK	12	26	Eukaryotic translation initiation factor 3 subunit J OS=Homo sapiens OX=9606 GN=EIF3J PE=1 SV=2	Eukaryotic translation initiation factor 3 subunit J	EIF3J	60.27	2714.15	-0.1	2	27	A1:Acetylation (Protein N-term):1000.00;S12:Phosphorylation (STY):0.00	S13	AAGDSDSWDADAF	12141.5	63522.2
Q07157	Q07157|ZO1_HUMAN	S	EDSSGMHHENQTYPPYS(+79.97)PQAQPQPIHR	17	27	Tight junction protein ZO-1 OS=Homo sapiens OX=9606 GN=TJP1 PE=1 SV=3	Tight junction protein ZO-1	TJP1	67.9	3210.36	0.3	883	909	S17:Phosphorylation (STY):0.00	S899	QTYPPYSPQAQPQ	3993.25	20991.4
Q9Y2K6	Q9Y2K6|UBP20_HUMAN	S	AVPIAVADEGES(+79.97)ESEDDDLKPR	12	22	Ubiquitin carboxyl-terminal hydrolase 20 OS=Homo sapiens OX=9606 GN=USP20 PE=1 SV=2	Ubiquitin carboxyl-terminal hydrolase 20	USP20	60.22	2421.06	-2.6	121	142	S12:Phosphorylation (STY):14.04	S132	VADEGESESEDDD	3655.18	19218.7
Q99958	Q99958|FOXC2_HUMAN	T	VET(+79.97)LS(+79.97)PESALQGSPR	3	15	Forkhead box protein C2 OS=Homo sapiens OX=9606 GN=FOXC2 PE=1 SV=1	Forkhead box protein C2	FOXC2	44.92	1729.73	5.9	228	242	T3:Phosphorylation (STY):29.85;S5:Phosphorylation (STY):11.12	T230	VITKVETLSPESA	36.7095	193.291
Q99958	Q99958|FOXC2_HUMAN	S	VET(+79.97)LS(+79.97)PESALQGSPR	5	15	Forkhead box protein C2 OS=Homo sapiens OX=9606 GN=FOXC2 PE=1 SV=1	Forkhead box protein C2	FOXC2	44.92	1729.73	5.9	228	242	T3:Phosphorylation (STY):29.85;S5:Phosphorylation (STY):11.12	S232	TKVETLSPESALQ	36.7095	193.291
Q9UER7	Q9UER7|DAXX_HUMAN	T	IC(+57.02)T(+79.97)LPSPPS(+79.97)PLASLAPVADSSTR	3	23	Death domain-associated protein 6 OS=Homo sapiens OX=9606 GN=DAXX PE=1 SV=2	Death domain-associated protein 6	DAXX	38.96	2496.14	-2.6	663	685	C2:Carbamidomethylation:1000.00;T3:Phosphorylation (STY):0.00;S9:Phosphorylation (STY):0.00	T665	NGKKICTLPSPPS	5360.36	28233.6
Q9UER7	Q9UER7|DAXX_HUMAN	S	IC(+57.02)T(+79.97)LPSPPS(+79.97)PLASLAPVADSSTR	9	23	Death domain-associated protein 6 OS=Homo sapiens OX=9606 GN=DAXX PE=1 SV=2	Death domain-associated protein 6	DAXX	38.96	2496.14	-2.6	663	685	C2:Carbamidomethylation:1000.00;T3:Phosphorylation (STY):0.00;S9:Phosphorylation (STY):0.00	S671	TLPSPPSPLASLA	5360.36	28233.6
Q9BW71	Q9BW71|HIRP3_HUMAN	S	FNSESES(+79.97)GSEAS(+79.97)S(+79.97)PDYFGPPAK	7	22	HIRA-interacting protein 3 OS=Homo sapiens OX=9606 GN=HIRIP3 PE=1 SV=3	HIRA-interacting protein 3	HIRIP3	42.09	2528.87	1.5	96	117	S7:Phosphorylation (STY):5.47;S12:Phosphorylation (STY):11.12;S13:Phosphorylation (STY):16.76	S102	FNSESESGSEASS	1405.53	7453.86
Q9BW71	Q9BW71|HIRP3_HUMAN	S	FNSESES(+79.97)GSEAS(+79.97)S(+79.97)PDYFGPPAK	12	22	HIRA-interacting protein 3 OS=Homo sapiens OX=9606 GN=HIRIP3 PE=1 SV=3	HIRA-interacting protein 3	HIRIP3	42.09	2528.87	1.5	96	117	S7:Phosphorylation (STY):5.47;S12:Phosphorylation (STY):11.12;S13:Phosphorylation (STY):16.76	S107	ESGSEASSPDYFG	1405.53	7453.86
Q9BW71	Q9BW71|HIRP3_HUMAN	S	FNSESES(+79.97)GSEAS(+79.97)S(+79.97)PDYFGPPAK	13	22	HIRA-interacting protein 3 OS=Homo sapiens OX=9606 GN=HIRIP3 PE=1 SV=3	HIRA-interacting protein 3	HIRIP3	42.09	2528.87	1.5	96	117	S7:Phosphorylation (STY):5.47;S12:Phosphorylation (STY):11.12;S13:Phosphorylation (STY):16.76	S108	SGSEASSPDYFGP	1405.53	7453.86
Q9BW71	Q9BW71|HIRP3_HUMAN	S	FNS(+79.97)ESESGS(+79.97)EASS(+79.97)PDYFGPPAK	3	22	HIRA-interacting protein 3 OS=Homo sapiens OX=9606 GN=HIRIP3 PE=1 SV=3	HIRA-interacting protein 3	HIRIP3	31.2	2528.87	-1	96	117	S3:Phosphorylation (STY):0.00;S9:Phosphorylation (STY):0.00;S13:Phosphorylation (STY):0.00	S98	KRFRFNSESESGS	1403.09	7453.86
Q9BW71	Q9BW71|HIRP3_HUMAN	S	FNS(+79.97)ESESGS(+79.97)EASS(+79.97)PDYFGPPAK	9	22	HIRA-interacting protein 3 OS=Homo sapiens OX=9606 GN=HIRIP3 PE=1 SV=3	HIRA-interacting protein 3	HIRIP3	31.2	2528.87	-1	96	117	S3:Phosphorylation (STY):0.00;S9:Phosphorylation (STY):0.00;S13:Phosphorylation (STY):0.00	S104	SESESGSEASSPD	1403.09	7453.86
Q9BW71	Q9BW71|HIRP3_HUMAN	S	FNS(+79.97)ESESGS(+79.97)EASS(+79.97)PDYFGPPAK	13	22	HIRA-interacting protein 3 OS=Homo sapiens OX=9606 GN=HIRIP3 PE=1 SV=3	HIRA-interacting protein 3	HIRIP3	31.2	2528.87	-1	96	117	S3:Phosphorylation (STY):0.00;S9:Phosphorylation (STY):0.00;S13:Phosphorylation (STY):0.00	S108	SGSEASSPDYFGP	1403.09	7453.86
Q9P2K3	Q9P2K3|RCOR3_HUMAN	S	HNQGDS(+79.97)DDDVEETHPMDGNDSDYDPK	6	26	REST corepressor 3 OS=Homo sapiens OX=9606 GN=RCOR3 PE=1 SV=2	REST corepressor 3	RCOR3	48.81	3011.07	0.1	151	176	S6:Phosphorylation (STY):2.37	S156	RHNQGDSDDDVEE	3739.91	19874.9
Q13501	Q13501|SQSTM_HUMAN	S	S(+79.97)RLTPVSPESSSTEEK	1	16	Sequestosome-1 OS=Homo sapiens OX=9606 GN=SQSTM1 PE=1 SV=1	Sequestosome-1	SQSTM1	49.66	1812.81	0	266	281	S1:Phosphorylation (STY):0.00	S266	EHGGKRSRLTPVS	2881.3	15349.3
Q8IWV8	Q8IWV8|UBR2_HUMAN	S	ESS(+79.97)PTSPVAETEGTIMEESSR	3	21	E3 ubiquitin-protein ligase UBR2 OS=Homo sapiens OX=9606 GN=UBR2 PE=1 SV=1	E3 ubiquitin-protein ligase UBR2	UBR2	47.64	2302.95	-0.8	1004	1024	S3:Phosphorylation (STY):0.00	S1006	KKMRESSPTSPVA	3860.65	20631.6
P25205	P25205|MCM3_HUMAN	S	DGDSYDPYDFS(+79.97)DTEEEMPQVHT(+79.97)PK	11	24	DNA replication licensing factor MCM3 OS=Homo sapiens OX=9606 GN=MCM3 PE=1 SV=3	DNA replication licensing factor MCM3	MCM3	75.5	2961.06	2.5	701	724	S11:Phosphorylation (STY):14.63;T22:Phosphorylation (STY):39.73	S711	YDPYDFSDTEEEM	13467.5	72370.5
P25205	P25205|MCM3_HUMAN	T	DGDSYDPYDFS(+79.97)DTEEEMPQVHT(+79.97)PK	22	24	DNA replication licensing factor MCM3 OS=Homo sapiens OX=9606 GN=MCM3 PE=1 SV=3	DNA replication licensing factor MCM3	MCM3	75.5	2961.06	2.5	701	724	S11:Phosphorylation (STY):14.63;T22:Phosphorylation (STY):39.73	T722	EMPQVHTPKTADS	13467.5	72370.5
P51790	P51790|CLCN3_HUMAN	S	VC(+57.02)FAQHTPSLPAES(+79.97)PRPLK	14	19	H(+)/Cl(-) exchange transporter 3 OS=Homo sapiens OX=9606 GN=CLCN3 PE=1 SV=2	H(+)/Cl(-) exchange transporter 3	CLCN3	38.21	2214.07	-4.1	732	750	C2:Carbamidomethylation:1000.00;S14:Phosphorylation (STY):21.15	S745	PSLPAESPRPLKL	60.1016	323.331
Q9Y2H2	Q9Y2H2|SAC2_HUMAN	S	S(+79.97)QSLSSTDSSVHAPSEITVAHGSGLGK	1	27	Phosphatidylinositide phosphatase SAC2 OS=Homo sapiens OX=9606 GN=INPP5F PE=1 SV=3	Phosphatidylinositide phosphatase SAC2	INPP5F	32.99	2718.25	-8	905	931	S1:Phosphorylation (STY):0.00	S905	PRLGSRSQSLSST	61.4022	332.138
Q9UMZ2	Q9UMZ2|SYNRG_HUMAN	S	TADSVS(+79.97)PLEPPTK	6	13	Synergin gamma OS=Homo sapiens OX=9606 GN=SYNRG PE=1 SV=2	Synergin gamma	SYNRG	58.56	1420.65	-4	575	587	S6:Phosphorylation (STY):43.88	S580	KTADSVSPLEPPT	14491.3	78419.4
Q13153	Q13153|PAK1_HUMAN	S	DVATSPIS(+79.97)PTENNTTPPDALTR	8	22	Serine/threonine-protein kinase PAK 1 OS=Homo sapiens OX=9606 GN=PAK1 PE=1 SV=2	Serine/threonine-protein kinase PAK 1	PAK1	49.14	2376.08	-0.5	216	237	S8:Phosphorylation (STY):6.59	S223	VATSPISPTENNT	406.929	2202.23
Q13153	Q13153|PAK1_HUMAN	T	DVATSPISPT(+79.97)ENNTTPPDALTR	10	22	Serine/threonine-protein kinase PAK 1 OS=Homo sapiens OX=9606 GN=PAK1 PE=1 SV=2	Serine/threonine-protein kinase PAK 1	PAK1	39.61	2376.08	-2.1	216	237	T10:Phosphorylation (STY):0.00	T225	TSPISPTENNTTP	406.929	2202.23
Q6UB99	Q6UB99|ANR11_HUMAN	S	GEDS(+79.97)WDSPVTDYR	4	13	Ankyrin repeat domain-containing protein 11 OS=Homo sapiens OX=9606 GN=ANKRD11 PE=1 SV=3	Ankyrin repeat domain-containing protein 11	ANKRD11	57.39	1605.6	1.8	854	866	S4:Phosphorylation (STY):42.60	S857	DFKGEDSWDSPVT	39.0542	211.385
Q9Y2H0	Q9Y2H0|DLGP4_HUMAN	T	QNSAT(+79.97)ESADSIEIYVPEAQTR	5	21	Disks large-associated protein 4 OS=Homo sapiens OX=9606 GN=DLGAP4 PE=1 SV=3	Disks large-associated protein 4	DLGAP4	64.65	2388.05	0.8	971	991	T5:Phosphorylation (STY):0.00	T975	VRQNSATESADSI	1605.28	8723.82
O75592	O75592|MYCB2_HUMAN	S	NS(+79.97)VQSGESDS(+79.97)DEEEESKEPPIK	2	22	E3 ubiquitin-protein ligase MYCBP2 OS=Homo sapiens OX=9606 GN=MYCBP2 PE=1 SV=4	E3 ubiquitin-protein ligase MYCBP2	MYCBP2	25.22	2578.98	-1.9	174	195	S2:Phosphorylation (STY):0.00;S10:Phosphorylation (STY):0.00	S175	AAASKNSVQSGES	836.525	4549.62
O75592	O75592|MYCB2_HUMAN	S	NS(+79.97)VQSGESDS(+79.97)DEEEESKEPPIK	10	22	E3 ubiquitin-protein ligase MYCBP2 OS=Homo sapiens OX=9606 GN=MYCBP2 PE=1 SV=4	E3 ubiquitin-protein ligase MYCBP2	MYCBP2	25.22	2578.98	-1.9	174	195	S2:Phosphorylation (STY):0.00;S10:Phosphorylation (STY):0.00	S183	QSGESDSDEEEES	836.525	4549.62
Q9H4L7	Q9H4L7|SMRCD_HUMAN	S	DTVIIVS(+79.97)EPS(+79.97)EDEESQGLPTMAR	7	23	SWI/SNF-related matrix-associated actin-dependent regulator of chromatin subfamily A containing DEAD/H box 1 OS=Homo sapiens OX=9606 GN=SMARCAD1 PE=1 SV=2	SWI/SNF-related matrix-associated actin-dependent regulator of chromatin subfamily A containing DEAD/H box 1	SMARCAD1	66.8	2662.11	-0.8	118	140	S7:Phosphorylation (STY):49.31;S10:Phosphorylation (STY):32.52	S124	DTVIIVSEPSEDE	31.4991	171.668
Q9H4L7	Q9H4L7|SMRCD_HUMAN	S	DTVIIVS(+79.97)EPS(+79.97)EDEESQGLPTMAR	10	23	SWI/SNF-related matrix-associated actin-dependent regulator of chromatin subfamily A containing DEAD/H box 1 OS=Homo sapiens OX=9606 GN=SMARCAD1 PE=1 SV=2	SWI/SNF-related matrix-associated actin-dependent regulator of chromatin subfamily A containing DEAD/H box 1	SMARCAD1	66.8	2662.11	-0.8	118	140	S7:Phosphorylation (STY):49.31;S10:Phosphorylation (STY):32.52	S127	IIVSEPSEDEESQ	31.4991	171.668
Q4ZHG4	Q4ZHG4|FNDC1_HUMAN	S	WPS(+79.97)S(+79.97)STPRGGK	3	11	Fibronectin type III domain-containing protein 1 OS=Homo sapiens OX=9606 GN=FNDC1 PE=2 SV=4	Fibronectin type III domain-containing protein 1	FNDC1	20.57	1318.51	1.4	1203	1213	S3:Phosphorylation (STY):27.16;S4:Phosphorylation (STY):21.94	S1205	SVPKWPSSSTPRG	1219.74	6675.92
Q4ZHG4	Q4ZHG4|FNDC1_HUMAN	S	WPS(+79.97)S(+79.97)STPRGGK	4	11	Fibronectin type III domain-containing protein 1 OS=Homo sapiens OX=9606 GN=FNDC1 PE=2 SV=4	Fibronectin type III domain-containing protein 1	FNDC1	20.57	1318.51	1.4	1203	1213	S3:Phosphorylation (STY):27.16;S4:Phosphorylation (STY):21.94	S1206	VPKWPSSSTPRGG	1219.74	6675.92
O00267	O00267|SPT5H_HUMAN	S	DVTNFTVGGFAPMS(+79.97)PR	14	16	Transcription elongation factor SPT5 OS=Homo sapiens OX=9606 GN=SUPT5H PE=1 SV=1	Transcription elongation factor SPT5	SUPT5H	41.95	1774.77	0.1	653	668	S14:Phosphorylation (STY):53.45	S666	GGFAPMSPRISSP	56.9094	311.903
Q8WVM7	Q8WVM7|STAG1_HUMAN	S	M(+42.01)ITSELPVLQDS(+79.97)TNETTAHS(+79.97)DAGSELEETEVK	12	32	Cohesin subunit SA-1 OS=Homo sapiens OX=9606 GN=STAG1 PE=1 SV=3	Cohesin subunit SA-1	STAG1	55.23	3662.55	0.8	1	32	M1:Acetylation (Protein N-term):1000.00;S12:Phosphorylation (STY):0.00;S20:Phosphorylation (STY):0.00	S12	LPVLQDSTNETTA	7225.53	39650.2
Q8WVM7	Q8WVM7|STAG1_HUMAN	S	M(+42.01)ITSELPVLQDS(+79.97)TNETTAHS(+79.97)DAGSELEETEVK	20	32	Cohesin subunit SA-1 OS=Homo sapiens OX=9606 GN=STAG1 PE=1 SV=3	Cohesin subunit SA-1	STAG1	55.23	3662.55	0.8	1	32	M1:Acetylation (Protein N-term):1000.00;S12:Phosphorylation (STY):0.00;S20:Phosphorylation (STY):0.00	S20	NETTAHSDAGSEL	7225.53	39650.2
O60343	O60343|TBCD4_HUMAN	Y	DY(+79.97)SPGDSPPGTPPASPPSS(+79.97)AWQTFPEEDSDSPQFR	2	35	TBC1 domain family member 4 OS=Homo sapiens OX=9606 GN=TBC1D4 PE=1 SV=2	TBC1 domain family member 4	TBC1D4	41.21	3892.55	-3.1	603	637	Y2:Phosphorylation (STY):0.00;S19:Phosphorylation (STY):0.00	Y604	LASEKDYSPGDSP	1340.61	7373.14
O60343	O60343|TBCD4_HUMAN	S	DY(+79.97)SPGDSPPGTPPASPPSS(+79.97)AWQTFPEEDSDSPQFR	19	35	TBC1 domain family member 4 OS=Homo sapiens OX=9606 GN=TBC1D4 PE=1 SV=2	TBC1 domain family member 4	TBC1D4	41.21	3892.55	-3.1	603	637	Y2:Phosphorylation (STY):0.00;S19:Phosphorylation (STY):0.00	S621	PASPPSSAWQTFP	1340.61	7373.14
Q9H7N4	Q9H7N4|SFR19_HUMAN	S	REVLYDS(+79.97)EGLSGEER	7	15	Splicing factor, arginine/serine-rich 19 OS=Homo sapiens OX=9606 GN=SCAF1 PE=1 SV=3	Splicing factor, arginine/serine-rich 19	SCAF1	34	1817.78	-1.5	728	742	S7:Phosphorylation (STY):11.12	S734	REVLYDSEGLSGE	2638.58	14537.6
P46821	P46821|MAP1B_HUMAN	S	ASVS(+79.97)PM(+15.99)DEPVPDSES(+79.97)PIEK	4	19	Microtubule-associated protein 1B OS=Homo sapiens OX=9606 GN=MAP1B PE=1 SV=2	Microtubule-associated protein 1B	MAP1B	53.84	2188.85	1.6	1375	1393	S4:Phosphorylation (STY):0.00;M6:Oxidation (M):1000.00;S15:Phosphorylation (STY):14.04	S1378	NERASVSPMDEPV	2314.14	12810.7
P46821	P46821|MAP1B_HUMAN	S	ASVS(+79.97)PM(+15.99)DEPVPDSES(+79.97)PIEK	15	19	Microtubule-associated protein 1B OS=Homo sapiens OX=9606 GN=MAP1B PE=1 SV=2	Microtubule-associated protein 1B	MAP1B	53.84	2188.85	1.6	1375	1393	S4:Phosphorylation (STY):0.00;M6:Oxidation (M):1000.00;S15:Phosphorylation (STY):14.04	S1389	PVPDSESPIEKVL	2314.14	12810.7
Q9BQL6	Q9BQL6|FERM1_HUMAN	S	NNKEPIIEDILNLESS(+79.97)PTASGSSVSPGLYSK	16	31	Fermitin family homolog 1 OS=Homo sapiens OX=9606 GN=FERMT1 PE=1 SV=1	Fermitin family homolog 1	FERMT1	31.65	3325.6	1.8	155	185	S16:Phosphorylation (STY):7.21	S170	ILNLESSPTASGS	385.224	2142.96
Q96D71	Q96D71|REPS1_HUMAN	S	TSADAQEPASPVVS(+79.97)PQQS(+79.97)PPTS(+79.97)PHTWR	14	27	RalBP1-associated Eps domain-containing protein 1 OS=Homo sapiens OX=9606 GN=REPS1 PE=1 SV=3	RalBP1-associated Eps domain-containing protein 1	REPS1	53.54	3097.26	-1.8	153	179	S14:Phosphorylation (STY):8.26;S18:Phosphorylation (STY):12.33;S22:Phosphorylation (STY):8.14	S166	PASPVVSPQQSPP	1120.88	6239.2
Q96D71	Q96D71|REPS1_HUMAN	S	TSADAQEPASPVVS(+79.97)PQQS(+79.97)PPTS(+79.97)PHTWR	18	27	RalBP1-associated Eps domain-containing protein 1 OS=Homo sapiens OX=9606 GN=REPS1 PE=1 SV=3	RalBP1-associated Eps domain-containing protein 1	REPS1	53.54	3097.26	-1.8	153	179	S14:Phosphorylation (STY):8.26;S18:Phosphorylation (STY):12.33;S22:Phosphorylation (STY):8.14	S170	VVSPQQSPPTSPH	1120.88	6239.2
Q96D71	Q96D71|REPS1_HUMAN	S	TSADAQEPASPVVS(+79.97)PQQS(+79.97)PPTS(+79.97)PHTWR	22	27	RalBP1-associated Eps domain-containing protein 1 OS=Homo sapiens OX=9606 GN=REPS1 PE=1 SV=3	RalBP1-associated Eps domain-containing protein 1	REPS1	53.54	3097.26	-1.8	153	179	S14:Phosphorylation (STY):8.26;S18:Phosphorylation (STY):12.33;S22:Phosphorylation (STY):8.14	S174	QQSPPTSPHTWRK	1120.88	6239.2
O95071	O95071|UBR5_HUMAN	S	TEMGPPPS(+79.97)PASTC(+57.02)SDASSIASSASMPYK	8	28	E3 ubiquitin-protein ligase UBR5 OS=Homo sapiens OX=9606 GN=UBR5 PE=1 SV=2	E3 ubiquitin-protein ligase UBR5	UBR5	65.64	2893.19	12.8	605	632	S8:Phosphorylation (STY):6.63;C13:Carbamidomethylation:1000.00	S612	EMGPPPSPASTCS	1305.85	7277.33
Q8WUZ0	Q8WUZ0|BCL7C_HUMAN	T	GT(+79.97)EPSPGGT(+79.97)PQPSRPVS(+79.97)PAGPPEGVPEEAQPPR	2	33	B-cell CLL/lymphoma 7 protein family member C OS=Homo sapiens OX=9606 GN=BCL7C PE=1 SV=3	B-cell CLL/lymphoma 7 protein family member C	BCL7C	44.07	3498.49	1.9	110	142	T2:Phosphorylation (STY):0.00;T9:Phosphorylation (STY):0.00;S17:Phosphorylation (STY):0.00	T111	GSLQKGTEPSPGG	7041.96	39295.9
Q8WUZ0	Q8WUZ0|BCL7C_HUMAN	T	GT(+79.97)EPSPGGT(+79.97)PQPSRPVS(+79.97)PAGPPEGVPEEAQPPR	9	33	B-cell CLL/lymphoma 7 protein family member C OS=Homo sapiens OX=9606 GN=BCL7C PE=1 SV=3	B-cell CLL/lymphoma 7 protein family member C	BCL7C	44.07	3498.49	1.9	110	142	T2:Phosphorylation (STY):0.00;T9:Phosphorylation (STY):0.00;S17:Phosphorylation (STY):0.00	T118	EPSPGGTPQPSRP	7041.96	39295.9
Q8WUZ0	Q8WUZ0|BCL7C_HUMAN	S	GT(+79.97)EPSPGGT(+79.97)PQPSRPVS(+79.97)PAGPPEGVPEEAQPPR	17	33	B-cell CLL/lymphoma 7 protein family member C OS=Homo sapiens OX=9606 GN=BCL7C PE=1 SV=3	B-cell CLL/lymphoma 7 protein family member C	BCL7C	44.07	3498.49	1.9	110	142	T2:Phosphorylation (STY):0.00;T9:Phosphorylation (STY):0.00;S17:Phosphorylation (STY):0.00	S126	QPSRPVSPAGPPE	7041.96	39295.9
P52948	P52948|NUP98_HUMAN	S	EEIENNS(+79.97)YHMHPAGIILTK	7	19	Nuclear pore complex protein Nup98-Nup96 OS=Homo sapiens OX=9606 GN=NUP98 PE=1 SV=4	Nuclear pore complex protein Nup98-Nup96	NUP98	24.36	2275.03	-1.6	720	738	S7:Phosphorylation (STY):0.00	S726	EEIENNSYHMHPA	57.2003	319.621
Q13541	Q13541|4EBP1_HUMAN	S	VVLGDGVQLPPGDYS(+79.97)TTPGGTLFSTT(+79.97)PGGTR	15	31	Eukaryotic translation initiation factor 4E-binding protein 1 OS=Homo sapiens OX=9606 GN=EIF4EBP1 PE=1 SV=3	Eukaryotic translation initiation factor 4E-binding protein 1	EIF4EBP1	74.11	3206.46	-1.5	21	51	S15:Phosphorylation (STY):0.00;T26:Phosphorylation (STY):14.02	S35	LPPGDYSTTPGGT	2805.32	15691.9
Q13541	Q13541|4EBP1_HUMAN	T	VVLGDGVQLPPGDYS(+79.97)TTPGGTLFSTT(+79.97)PGGTR	26	31	Eukaryotic translation initiation factor 4E-binding protein 1 OS=Homo sapiens OX=9606 GN=EIF4EBP1 PE=1 SV=3	Eukaryotic translation initiation factor 4E-binding protein 1	EIF4EBP1	74.11	3206.46	-1.5	21	51	S15:Phosphorylation (STY):0.00;T26:Phosphorylation (STY):14.02	T46	GTLFSTTPGGTRI	2805.32	15691.9
Q92793	Q92793|CBP_HUMAN	S	S(+79.97)PLSQGDSSAPSLPK	1	15	CREB-binding protein OS=Homo sapiens OX=9606 GN=CREBBP PE=1 SV=3	CREB-binding protein	CREBBP	60.01	1549.7	-1.2	121	135	S1:Phosphorylation (STY):37.54	S121	LSAMGKSPLSQGD	1057.33	5941.34
Q8N302	Q8N302|AGGF1_HUMAN	S	VTVPTSGNTIES(+79.97)PLHENISNSTSFK	12	25	Angiogenic factor with G patch and FHA domains 1 OS=Homo sapiens OX=9606 GN=AGGF1 PE=1 SV=2	Angiogenic factor with G patch and FHA domains 1	AGGF1	52.3	2738.28	-2	333	357	S12:Phosphorylation (STY):9.42	S344	SGNTIESPLHENI	1571.01	8844.98
P24534	P24534|EF1B_HUMAN	T	YGPADVEDTTGSGAT(+79.97)DSKDDDDIDLFGS(+79.97)DDEEESEEAK	15	38	Elongation factor 1-beta OS=Homo sapiens OX=9606 GN=EEF1B2 PE=1 SV=3	Elongation factor 1-beta	EEF1B2	52.06	4183.55	1.1	79	116	T15:Phosphorylation (STY):0.00;S28:Phosphorylation (STY):7.03	T93	TTGSGATDSKDDD	14717.4	83116
P24534	P24534|EF1B_HUMAN	S	YGPADVEDTTGSGAT(+79.97)DSKDDDDIDLFGS(+79.97)DDEEESEEAK	28	38	Elongation factor 1-beta OS=Homo sapiens OX=9606 GN=EEF1B2 PE=1 SV=3	Elongation factor 1-beta	EEF1B2	52.06	4183.55	1.1	79	116	T15:Phosphorylation (STY):0.00;S28:Phosphorylation (STY):7.03	S106	DIDLFGSDDEEES	14717.4	83116
Q96D71	Q96D71|REPS1_HUMAN	S	TSADAQEPASPVVS(+79.97)PQQS(+79.97)PPTSPHT(+79.97)WR	14	27	RalBP1-associated Eps domain-containing protein 1 OS=Homo sapiens OX=9606 GN=REPS1 PE=1 SV=3	RalBP1-associated Eps domain-containing protein 1	REPS1	36.7	3097.26	3.6	153	179	S14:Phosphorylation (STY):8.26;S18:Phosphorylation (STY):5.59;T25:Phosphorylation (STY):5.55	S166	PASPVVSPQQSPP	398.106	2250.47
Q96D71	Q96D71|REPS1_HUMAN	S	TSADAQEPASPVVS(+79.97)PQQS(+79.97)PPTSPHT(+79.97)WR	18	27	RalBP1-associated Eps domain-containing protein 1 OS=Homo sapiens OX=9606 GN=REPS1 PE=1 SV=3	RalBP1-associated Eps domain-containing protein 1	REPS1	36.7	3097.26	3.6	153	179	S14:Phosphorylation (STY):8.26;S18:Phosphorylation (STY):5.59;T25:Phosphorylation (STY):5.55	S170	VVSPQQSPPTSPH	398.106	2250.47
Q96D71	Q96D71|REPS1_HUMAN	T	TSADAQEPASPVVS(+79.97)PQQS(+79.97)PPTSPHT(+79.97)WR	25	27	RalBP1-associated Eps domain-containing protein 1 OS=Homo sapiens OX=9606 GN=REPS1 PE=1 SV=3	RalBP1-associated Eps domain-containing protein 1	REPS1	36.7	3097.26	3.6	153	179	S14:Phosphorylation (STY):8.26;S18:Phosphorylation (STY):5.59;T25:Phosphorylation (STY):5.55	T177	PPTSPHTWRKHSR	398.106	2250.47
Q52LW3	Q52LW3|RHG29_HUMAN	S	HLNSSQPSGFGPANS(+79.97)LEDVVR	15	21	Rho GTPase-activating protein 29 OS=Homo sapiens OX=9606 GN=ARHGAP29 PE=1 SV=2	Rho GTPase-activating protein 29	ARHGAP29	46.51	2290.04	-3	485	505	S15:Phosphorylation (STY):78.16	S499	GFGPANSLEDVVR	386.105	2185.18
Q08945	Q08945|SSRP1_HUMAN	S	SKEFVS(+79.97)SDES(+79.97)S(+79.97)S(+79.97)GENK	6	16	FACT complex subunit SSRP1 OS=Homo sapiens OX=9606 GN=SSRP1 PE=1 SV=1	FACT complex subunit SSRP1	SSRP1	29.22	2035.61	0.3	662	677	S6:Phosphorylation (STY):17.01;S10:Phosphorylation (STY):0.00;S11:Phosphorylation (STY):0.00;S12:Phosphorylation (STY):0.00	S667	KSKEFVSSDESSS	2622.91	14888.5
Q08945	Q08945|SSRP1_HUMAN	S	SKEFVS(+79.97)SDES(+79.97)S(+79.97)S(+79.97)GENK	10	16	FACT complex subunit SSRP1 OS=Homo sapiens OX=9606 GN=SSRP1 PE=1 SV=1	FACT complex subunit SSRP1	SSRP1	29.22	2035.61	0.3	662	677	S6:Phosphorylation (STY):17.01;S10:Phosphorylation (STY):0.00;S11:Phosphorylation (STY):0.00;S12:Phosphorylation (STY):0.00	S671	FVSSDESSSGENK	2622.91	14888.5
Q08945	Q08945|SSRP1_HUMAN	S	SKEFVS(+79.97)SDES(+79.97)S(+79.97)S(+79.97)GENK	11	16	FACT complex subunit SSRP1 OS=Homo sapiens OX=9606 GN=SSRP1 PE=1 SV=1	FACT complex subunit SSRP1	SSRP1	29.22	2035.61	0.3	662	677	S6:Phosphorylation (STY):17.01;S10:Phosphorylation (STY):0.00;S11:Phosphorylation (STY):0.00;S12:Phosphorylation (STY):0.00	S672	VSSDESSSGENKS	2622.91	14888.5
Q08945	Q08945|SSRP1_HUMAN	S	SKEFVS(+79.97)SDES(+79.97)S(+79.97)S(+79.97)GENK	12	16	FACT complex subunit SSRP1 OS=Homo sapiens OX=9606 GN=SSRP1 PE=1 SV=1	FACT complex subunit SSRP1	SSRP1	29.22	2035.61	0.3	662	677	S6:Phosphorylation (STY):17.01;S10:Phosphorylation (STY):0.00;S11:Phosphorylation (STY):0.00;S12:Phosphorylation (STY):0.00	S673	SSDESSSGENKSK	2622.91	14888.5
O60832	O60832|DKC1_HUMAN:Q9Y2D5|AKAP2_HUMAN	S	KRES(+79.97)ESES(+79.97)DETPPAAPQLIK	4	20	H/ACA ribonucleoprotein complex subunit DKC1 OS=Homo sapiens OX=9606 GN=DKC1 PE=1 SV=3	H/ACA ribonucleoprotein complex subunit DKC1	DKC1	62.34	2371.03	-3.6	448	467	S4:Phosphorylation (STY):0.00;S8:Phosphorylation (STY):0.00	S451	AKRKRESESESDE	32112	182342
O60832	O60832|DKC1_HUMAN:Q9Y2D5|AKAP2_HUMAN	S	KRES(+79.97)ESES(+79.97)DETPPAAPQLIK	8	20	H/ACA ribonucleoprotein complex subunit DKC1 OS=Homo sapiens OX=9606 GN=DKC1 PE=1 SV=3	H/ACA ribonucleoprotein complex subunit DKC1	DKC1	62.34	2371.03	-3.6	448	467	S4:Phosphorylation (STY):0.00;S8:Phosphorylation (STY):0.00	S455	RESESESDETPPA	32112	182342
Q9Y4X4	Q9Y4X4|KLF12_HUMAN	S	TELLESEQGS(+79.97)PNVHNYPDMEAVPLLLNNVK	10	30	Krueppel-like factor 12 OS=Homo sapiens OX=9606 GN=KLF12 PE=1 SV=2	Krueppel-like factor 12	KLF12	30.52	3429.62	8.9	33	62	S10:Phosphorylation (STY):0.00	S42	LESEQGSPNVHNY	725.512	4129.76
P46063	P46063|RECQ1_HUMAN	S	QC(+57.02)LEDSDAGASNEYDSS(+79.97)PAAWNK	17	23	ATP-dependent DNA helicase Q1 OS=Homo sapiens OX=9606 GN=RECQL PE=1 SV=3	ATP-dependent DNA helicase Q1	RECQL	63.37	2593.99	2.4	48	70	C2:Carbamidomethylation:1000.00;S17:Phosphorylation (STY):17.01	S64	SNEYDSSPAAWNK	1712.95	9881.21
P29317	P29317|EPHA2_HUMAN	S	LPSTS(+79.97)GSEGVPFR	5	13	Ephrin type-A receptor 2 OS=Homo sapiens OX=9606 GN=EPHA2 PE=1 SV=2	Ephrin type-A receptor 2	EPHA2	46.96	1412.63	-3.6	895	907	S5:Phosphorylation (STY):14.04	S899	IRLPSTSGSEGVP	3093.61	17980.5
Q7Z4V5	Q7Z4V5|HDGR2_HUMAN	S	APSAS(+79.97)DS(+79.97)DS(+79.97)KADSDGAKPEPVAMAR	5	25	Hepatoma-derived growth factor-related protein 2 OS=Homo sapiens OX=9606 GN=HDGFL2 PE=1 SV=1	Hepatoma-derived growth factor-related protein 2	HDGFL2	20.12	2699.02	-1.6	228	252	S5:Phosphorylation (STY):9.40;S7:Phosphorylation (STY):5.14;S9:Phosphorylation (STY):6.65	S232	KKAPSASDSDSKA	4846.45	28227.6
Q7Z4V5	Q7Z4V5|HDGR2_HUMAN	S	APSAS(+79.97)DS(+79.97)DS(+79.97)KADSDGAKPEPVAMAR	7	25	Hepatoma-derived growth factor-related protein 2 OS=Homo sapiens OX=9606 GN=HDGFL2 PE=1 SV=1	Hepatoma-derived growth factor-related protein 2	HDGFL2	20.12	2699.02	-1.6	228	252	S5:Phosphorylation (STY):9.40;S7:Phosphorylation (STY):5.14;S9:Phosphorylation (STY):6.65	S234	APSASDSDSKADS	4846.45	28227.6
Q7Z4V5	Q7Z4V5|HDGR2_HUMAN	S	APSAS(+79.97)DS(+79.97)DS(+79.97)KADSDGAKPEPVAMAR	9	25	Hepatoma-derived growth factor-related protein 2 OS=Homo sapiens OX=9606 GN=HDGFL2 PE=1 SV=1	Hepatoma-derived growth factor-related protein 2	HDGFL2	20.12	2699.02	-1.6	228	252	S5:Phosphorylation (STY):9.40;S7:Phosphorylation (STY):5.14;S9:Phosphorylation (STY):6.65	S236	SASDSDSKADSDG	4846.45	28227.6
Q8NDT2	Q8NDT2|RB15B_HUMAN	S	SSS(+79.97)SSAAASTPPPGPPAPADPLGYLPLHGGYQYK	3	34	Putative RNA-binding protein 15B OS=Homo sapiens OX=9606 GN=RBM15B PE=1 SV=3	Putative RNA-binding protein 15B	RBM15B	34.67	3417.59	0.9	229	262	S3:Phosphorylation (STY):0.00	S231	SSRRSSSSSAAAS	1052.24	6197.82
Q86UU0	Q86UU0|BCL9L_HUMAN	S	ANQIS(+79.97)PSNSSLK	5	12	B-cell CLL/lymphoma 9-like protein OS=Homo sapiens OX=9606 GN=BCL9L PE=1 SV=1	B-cell CLL/lymphoma 9-like protein	BCL9L	52.49	1324.6	-1	84	95	S5:Phosphorylation (STY):14.63	S88	AKANQISPSNSSL	2218.27	13128.5
Q8IYB3	Q8IYB3|SRRM1_HUMAN	S	QS(+79.97)PS(+79.97)PSTRPIR	2	11	Serine/arginine repetitive matrix protein 1 OS=Homo sapiens OX=9606 GN=SRRM1 PE=1 SV=2	Serine/arginine repetitive matrix protein 1	SRRM1	43.16	1384.59	0.4	712	722	S2:Phosphorylation (STY):43.39;S4:Phosphorylation (STY):14.04	S713	SPQRRQSPSPSTR	11352.8	67351
Q8IYB3	Q8IYB3|SRRM1_HUMAN	S	QS(+79.97)PS(+79.97)PSTRPIR	4	11	Serine/arginine repetitive matrix protein 1 OS=Homo sapiens OX=9606 GN=SRRM1 PE=1 SV=2	Serine/arginine repetitive matrix protein 1	SRRM1	43.16	1384.59	0.4	712	722	S2:Phosphorylation (STY):43.39;S4:Phosphorylation (STY):14.04	S715	QRRQSPSPSTRPI	11352.8	67351
P78559	P78559|MAP1A_HUMAN	Y	VAELEEEQSQGSSSY(+79.97)SDWVK	15	20	Microtubule-associated protein 1A OS=Homo sapiens OX=9606 GN=MAP1A PE=1 SV=6	Microtubule-associated protein 1A	MAP1A	59.7	2336.97	1.6	106	125	Y15:Phosphorylation (STY):0.00	Y120	SQGSSSYSDWVKN	792.145	4713.84
P08559	P08559|ODPA_HUMAN	S	YGMGTS(+79.97)VER	6	9	Pyruvate dehydrogenase E1 component subunit alpha, somatic form, mitochondrial OS=Homo sapiens OX=9606 GN=PDHA1 PE=1 SV=3	Pyruvate dehydrogenase E1 component subunit alpha, somatic form, mitochondrial	PDHA1	46.94	1078.42	-3.8	227	235	S6:Phosphorylation (STY):11.06	S232	RYGMGTSVERAAA	1410.75	8411.06
P78559	P78559|MAP1A_HUMAN	T	YLPGAIT(+79.97)SPDEHILT(+79.97)PDSSFSK	7	22	Microtubule-associated protein 1A OS=Homo sapiens OX=9606 GN=MAP1A PE=1 SV=6	Microtubule-associated protein 1A	MAP1A	33.31	2534.1	8.5	1304	1325	T7:Phosphorylation (STY):0.00;T15:Phosphorylation (STY):3.64	T1310	YLPGAITSPDEHI	721.229	4305.67
P78559	P78559|MAP1A_HUMAN	T	YLPGAIT(+79.97)SPDEHILT(+79.97)PDSSFSK	15	22	Microtubule-associated protein 1A OS=Homo sapiens OX=9606 GN=MAP1A PE=1 SV=6	Microtubule-associated protein 1A	MAP1A	33.31	2534.1	8.5	1304	1325	T7:Phosphorylation (STY):0.00;T15:Phosphorylation (STY):3.64	T1318	PDEHILTPDSSFS	721.229	4305.67
Q92974	Q92974|ARHG2_HUMAN	S	LQDSSDPDTGSEEEGSS(+79.97)RLSPPHSPR	17	26	Rho guanine nucleotide exchange factor 2 OS=Homo sapiens OX=9606 GN=ARHGEF2 PE=1 SV=4	Rho guanine nucleotide exchange factor 2	ARHGEF2	68.9	2846.2	1.4	937	962	S17:Phosphorylation (STY):0.00	S953	SEEEGSSRLSPPH	3481.28	20797.5
Q96JC9	Q96JC9|EAF1_HUMAN	S	TS(+79.97)PLKDNPSPEPQLDDIKR	2	19	ELL-associated factor 1 OS=Homo sapiens OX=9606 GN=EAF1 PE=1 SV=1	ELL-associated factor 1	EAF1	57.74	2229.07	-3.3	157	175	S2:Phosphorylation (STY):0.00	S158	PVGPKTSPLKDNP	6648.16	39747.3
Q7KZ85	Q7KZ85|SPT6H_HUMAN	S	GFINDDDDEDEGEEDEGS(+79.97)DS(+79.97)GDSEDDVGHK	18	30	Transcription elongation factor SPT6 OS=Homo sapiens OX=9606 GN=SUPT6H PE=1 SV=2	Transcription elongation factor SPT6	SUPT6H	46.6	3387.09	1.3	56	85	S18:Phosphorylation (STY):0.00;S20:Phosphorylation (STY):0.00	S73	GEEDEGSDSGDSE	2945.21	17638
Q7KZ85	Q7KZ85|SPT6H_HUMAN	S	GFINDDDDEDEGEEDEGS(+79.97)DS(+79.97)GDSEDDVGHK	20	30	Transcription elongation factor SPT6 OS=Homo sapiens OX=9606 GN=SUPT6H PE=1 SV=2	Transcription elongation factor SPT6	SUPT6H	46.6	3387.09	1.3	56	85	S18:Phosphorylation (STY):0.00;S20:Phosphorylation (STY):0.00	S75	EDEGSDSGDSEDD	2945.21	17638
Q8IX90	Q8IX90|SKA3_HUMAN	S	NSVHEQEAINS(+79.97)DPELSNC(+57.02)ENFQK	11	23	Spindle and kinetochore-associated protein 3 OS=Homo sapiens OX=9606 GN=SKA3 PE=1 SV=2	Spindle and kinetochore-associated protein 3	SKA3	67	2768.14	-2.7	109	131	S11:Phosphorylation (STY):43.00;C18:Carbamidomethylation:1000.00	S119	EQEAINSDPELSN	783.345	4699.59
Q8N3V7	Q8N3V7|SYNPO_HUMAN	S	SSPGLYTSPGQDSLQPTAVSPPYGGDIS(+79.97)PVSPSR	28	34	Synaptopodin OS=Homo sapiens OX=9606 GN=SYNPO PE=1 SV=2	Synaptopodin	SYNPO	59.23	3480.61	3.1	863	896	S28:Phosphorylation (STY):19.05	S890	PYGGDISPVSPSR	785.792	4720.26
P17812	P17812|PYRG1_HUMAN	S	SGS(+79.97)S(+79.97)SPDSEITELK	3	14	CTP synthase 1 OS=Homo sapiens OX=9606 GN=CTPS1 PE=1 SV=2	CTP synthase 1	CTPS1	58.19	1595.6	-1.8	571	584	S3:Phosphorylation (STY):0.00;S4:Phosphorylation (STY):13.80	S573	YSDRSGSSSPDSE	5658.8	34126.9
P17812	P17812|PYRG1_HUMAN	S	SGS(+79.97)S(+79.97)SPDSEITELK	4	14	CTP synthase 1 OS=Homo sapiens OX=9606 GN=CTPS1 PE=1 SV=2	CTP synthase 1	CTPS1	58.19	1595.6	-1.8	571	584	S3:Phosphorylation (STY):0.00;S4:Phosphorylation (STY):13.80	S574	SDRSGSSSPDSEI	5658.8	34126.9
Q12986	Q12986|NFX1_HUMAN	S	AQS(+79.97)LAEQTSDTAGLESSTR	3	19	Transcriptional repressor NF-X1 OS=Homo sapiens OX=9606 GN=NFX1 PE=1 SV=2	Transcriptional repressor NF-X1	NFX1	54.07	2030.88	0.9	121	139	S3:Phosphorylation (STY):71.64	S123	RVKKAQSLAEQTS	60.9933	368.486
Q02880	Q02880|TOP2B_HUMAN:Q8IYB3|SRRM1_HUMAN	S	KRNPWSDDES(+79.97)K	10	11	DNA topoisomerase 2-beta OS=Homo sapiens OX=9606 GN=TOP2B PE=1 SV=3	DNA topoisomerase 2-beta	TOP2B	32.94	1440.6	8.4	1331	1341	S10:Phosphorylation (STY):25.70	S1340	PWSDDESKSESDL	1019.38	6173.79
P68371	Q641Q2|WAC2A_HUMAN:P07437|TBB5_HUMAN:P68371|TBB4B_HUMAN	T	EAESC(+57.02)DC(+57.02)LQGFQLT(+79.97)HSLGGGTGSGMGTLLISK	14	32	Tubulin beta-4B chain OS=Homo sapiens OX=9606 GN=TUBB4B PE=1 SV=1	Tubulin beta-4B chain	TUBB4B	37.65	3390.49	4.6	123	154	C5:Carbamidomethylation:1000.00;C7:Carbamidomethylation:1000.00	T136	LQGFQLTHSLGGG	1288.31	7814.12
P07437	Q641Q2|WAC2A_HUMAN:P07437|TBB5_HUMAN:P68371|TBB4B_HUMAN	T	EAESC(+57.02)DC(+57.02)LQGFQLT(+79.97)HSLGGGTGSGMGTLLISK	14	32	Tubulin beta chain OS=Homo sapiens OX=9606 GN=TUBB PE=1 SV=2	Tubulin beta chain	TUBB	37.65	3390.49	4.6	123	154	C5:Carbamidomethylation:1000.00;C7:Carbamidomethylation:1000.00	T136	LQGFQLTHSLGGG	1288.31	7814.12
Q01082	Q01082|SPTB2_HUMAN	T	T(+79.97)S(+79.97)SKES(+79.97)SPIPS(+79.97)PTSDR	1	16	Spectrin beta chain, non-erythrocytic 1 OS=Homo sapiens OX=9606 GN=SPTBN1 PE=1 SV=2	Spectrin beta chain, non-erythrocytic 1	SPTBN1	28.59	1994.67	0.4	2159	2174	T1:Phosphorylation (STY):0.00;S2:Phosphorylation (STY):0.00;S6:Phosphorylation (STY):0.00;S11:Phosphorylation (STY):14.04	T2159	GATEQRTSSKESS	11712	71074.7
Q01082	Q01082|SPTB2_HUMAN	S	T(+79.97)S(+79.97)SKES(+79.97)SPIPS(+79.97)PTSDR	2	16	Spectrin beta chain, non-erythrocytic 1 OS=Homo sapiens OX=9606 GN=SPTBN1 PE=1 SV=2	Spectrin beta chain, non-erythrocytic 1	SPTBN1	28.59	1994.67	0.4	2159	2174	T1:Phosphorylation (STY):0.00;S2:Phosphorylation (STY):0.00;S6:Phosphorylation (STY):0.00;S11:Phosphorylation (STY):14.04	S2160	ATEQRTSSKESSP	11712	71074.7
Q01082	Q01082|SPTB2_HUMAN	S	T(+79.97)S(+79.97)SKES(+79.97)SPIPS(+79.97)PTSDR	6	16	Spectrin beta chain, non-erythrocytic 1 OS=Homo sapiens OX=9606 GN=SPTBN1 PE=1 SV=2	Spectrin beta chain, non-erythrocytic 1	SPTBN1	28.59	1994.67	0.4	2159	2174	T1:Phosphorylation (STY):0.00;S2:Phosphorylation (STY):0.00;S6:Phosphorylation (STY):0.00;S11:Phosphorylation (STY):14.04	S2164	RTSSKESSPIPSP	11712	71074.7
Q01082	Q01082|SPTB2_HUMAN	S	T(+79.97)S(+79.97)SKES(+79.97)SPIPS(+79.97)PTSDR	11	16	Spectrin beta chain, non-erythrocytic 1 OS=Homo sapiens OX=9606 GN=SPTBN1 PE=1 SV=2	Spectrin beta chain, non-erythrocytic 1	SPTBN1	28.59	1994.67	0.4	2159	2174	T1:Phosphorylation (STY):0.00;S2:Phosphorylation (STY):0.00;S6:Phosphorylation (STY):0.00;S11:Phosphorylation (STY):14.04	S2169	ESSPIPSPTSDRK	11712	71074.7
Q01082	Q01082|SPTB2_HUMAN	T	T(+79.97)SS(+79.97)KESS(+79.97)PIPS(+79.97)PTSDR	1	16	Spectrin beta chain, non-erythrocytic 1 OS=Homo sapiens OX=9606 GN=SPTBN1 PE=1 SV=2	Spectrin beta chain, non-erythrocytic 1	SPTBN1	59.01	1994.67	2.3	2159	2174	T1:Phosphorylation (STY):0.00;S3:Phosphorylation (STY):11.06;S7:Phosphorylation (STY):26.02;S11:Phosphorylation (STY):18.53	T2159	GATEQRTSSKESS	11712	71074.7
Q01082	Q01082|SPTB2_HUMAN	S	T(+79.97)SS(+79.97)KESS(+79.97)PIPS(+79.97)PTSDR	3	16	Spectrin beta chain, non-erythrocytic 1 OS=Homo sapiens OX=9606 GN=SPTBN1 PE=1 SV=2	Spectrin beta chain, non-erythrocytic 1	SPTBN1	59.01	1994.67	2.3	2159	2174	T1:Phosphorylation (STY):0.00;S3:Phosphorylation (STY):11.06;S7:Phosphorylation (STY):26.02;S11:Phosphorylation (STY):18.53	S2161	TEQRTSSKESSPI	11712	71074.7
Q01082	Q01082|SPTB2_HUMAN	S	T(+79.97)SS(+79.97)KESS(+79.97)PIPS(+79.97)PTSDR	7	16	Spectrin beta chain, non-erythrocytic 1 OS=Homo sapiens OX=9606 GN=SPTBN1 PE=1 SV=2	Spectrin beta chain, non-erythrocytic 1	SPTBN1	59.01	1994.67	2.3	2159	2174	T1:Phosphorylation (STY):0.00;S3:Phosphorylation (STY):11.06;S7:Phosphorylation (STY):26.02;S11:Phosphorylation (STY):18.53	S2165	TSSKESSPIPSPT	11712	71074.7
Q01082	Q01082|SPTB2_HUMAN	S	T(+79.97)SS(+79.97)KESS(+79.97)PIPS(+79.97)PTSDR	11	16	Spectrin beta chain, non-erythrocytic 1 OS=Homo sapiens OX=9606 GN=SPTBN1 PE=1 SV=2	Spectrin beta chain, non-erythrocytic 1	SPTBN1	59.01	1994.67	2.3	2159	2174	T1:Phosphorylation (STY):0.00;S3:Phosphorylation (STY):11.06;S7:Phosphorylation (STY):26.02;S11:Phosphorylation (STY):18.53	S2169	ESSPIPSPTSDRK	11712	71074.7
Q15652	Q15652|JHD2C_HUMAN	T	ISLC(+57.02)MPESQQQNT(+79.97)PPK	13	16	Probable JmjC domain-containing histone demethylation protein 2C OS=Homo sapiens OX=9606 GN=JMJD1C PE=1 SV=2	Probable JmjC domain-containing histone demethylation protein 2C	JMJD1C	40.92	1936.84	5.3	1966	1981	C4:Carbamidomethylation:1000.00;T13:Phosphorylation (STY):51.00	T1978	ESQQQNTPPKSEK	32.2676	196.412
O95684	O95684|CEP43_HUMAN	S	EKGPTTGEGALDLSDVHS(+79.97)PPK	18	21	Centrosomal protein 43 OS=Homo sapiens OX=9606 GN=CEP43 PE=1 SV=1	Centrosomal protein 43	CEP43	44.11	2214.02	2.6	139	159	S18:Phosphorylation (STY):17.65	S156	DLSDVHSPPKSPE	39.2688	239.313
Q92503	Q92503|S14L1_HUMAN	Y	EGLSGDALSSPSAPEPVVGTPDDKLDADY(+79.97)IK	29	31	SEC14-like protein 1 OS=Homo sapiens OX=9606 GN=SEC14L1 PE=1 SV=2	SEC14-like protein 1	SEC14L1	19.73	3222.49	-11.3	215	245	Y29:Phosphorylation (STY):5.14	Y243	DKLDADYIKRYLG	1527.48	9376.07
Q13501	Q13501|SQSTM_HUMAN	S	EVDPSTGELQSLQM(+15.99)PES(+79.97)EGPSS(+79.97)LDPSQEGPTGLK	17	34	Sequestosome-1 OS=Homo sapiens OX=9606 GN=SQSTM1 PE=1 SV=1	Sequestosome-1	SQSTM1	64.76	3701.56	-1	345	378	M14:Oxidation (M):1000.00;S17:Phosphorylation (STY):3.13;S22:Phosphorylation (STY):0.00	S361	SLQMPESEGPSSL	56.9729	350.204
Q13501	Q13501|SQSTM_HUMAN	S	EVDPSTGELQSLQM(+15.99)PES(+79.97)EGPSS(+79.97)LDPSQEGPTGLK	22	34	Sequestosome-1 OS=Homo sapiens OX=9606 GN=SQSTM1 PE=1 SV=1	Sequestosome-1	SQSTM1	64.76	3701.56	-1	345	378	M14:Oxidation (M):1000.00;S17:Phosphorylation (STY):3.13;S22:Phosphorylation (STY):0.00	S366	ESEGPSSLDPSQE	56.9729	350.204
Q96EM0	Q96EM0|T3HPD_HUMAN	S	SPTGS(+79.97)GVTAR	5	10	Trans-3-hydroxy-L-proline dehydratase OS=Homo sapiens OX=9606 GN=L3HYPDH PE=1 SV=2	Trans-3-hydroxy-L-proline dehydratase	L3HYPDH	21.08	1011.44	-2	271	280	S5:Phosphorylation (STY):7.77	S275	DRSPTGSGVTARI	59.3693	366.93
O43896	O43896|KIF1C_HUMAN	T	YPPYT(+79.97)TPPR	5	9	Kinesin-like protein KIF1C OS=Homo sapiens OX=9606 GN=KIF1C PE=1 SV=3	Kinesin-like protein KIF1C	KIF1C	37.94	1170.51	-2	1078	1086	T5:Phosphorylation (STY):0.00	T1082	PRYPPYTTPPRMR	971.291	6014.18
P54259	P54259|ATN1_HUMAN	S	TAS(+79.97)PPGPPPYGK	3	12	Atrophin-1 OS=Homo sapiens OX=9606 GN=ATN1 PE=1 SV=3	Atrophin-1	ATN1	66.06	1247.56	-3.3	630	641	S3:Phosphorylation (STY):9.40	S632	AGYKTASPPGPPP	7154.73	44422.1
P52701	P52701|MSH6_HUMAN	S	VISDS(+79.97)ESDIGGSDVEFKPDTK	5	21	DNA mismatch repair protein Msh6 OS=Homo sapiens OX=9606 GN=MSH6 PE=1 SV=2	DNA mismatch repair protein Msh6	MSH6	58.42	2304	0.5	250	270	S5:Phosphorylation (STY):0.00	S254	RRVISDSESDIGG	35103.2	218331
Q9NP61	Q9NP61|ARFG3_HUMAN	S	SSSFSS(+79.97)WDDSSDSYWK	6	16	ADP-ribosylation factor GTPase-activating protein 3 OS=Homo sapiens OX=9606 GN=ARFGAP3 PE=1 SV=1	ADP-ribosylation factor GTPase-activating protein 3	ARFGAP3	56.69	1949.7	-1	365	380	S6:Phosphorylation (STY):27.96	S370	RSSSFSSWDDSSD	190.025	1191.17
Q8WYH8	Q08945|SSRP1_HUMAN:Q8WYH8|ING5_HUMAN	S	DKMEGS(+79.97)DFESSGGR	6	14	Inhibitor of growth protein 5 OS=Homo sapiens OX=9606 GN=ING5 PE=1 SV=1	Inhibitor of growth protein 5	ING5	51.43	1580.58	-1.3	113	126	S6:Phosphorylation (STY):58.99	S118	KDKMEGSDFESSG	7293.55	45794.9
Q15054	Q15054|DPOD3_HUMAN	S	VALS(+79.97)DDETK	4	9	DNA polymerase delta subunit 3 OS=Homo sapiens OX=9606 GN=POLD3 PE=1 SV=2	DNA polymerase delta subunit 3	POLD3	46.69	1056.44	-10.2	304	312	S4:Phosphorylation (STY):51.80	S307	GKRVALSDDETKE	1177.43	7395.95
Q9BUA3	Q9BUA3|SPNDC_HUMAN	S	PEPPS(+79.97)PDSPTETFAAPAEVR	5	20	Spindlin interactor and repressor of chromatin-binding protein OS=Homo sapiens OX=9606 GN=SPINDOC PE=1 SV=3	Spindlin interactor and repressor of chromatin-binding protein	SPINDOC	28.64	2173.96	4.1	244	263	S5:Phosphorylation (STY):0.00	S248	PDPEPPSPDSPTE	361.01	2281.47
Q15811	Q15811|ITSN1_HUMAN	S	STSMDSGSSES(+79.97)PASLK	11	16	Intersectin-1 OS=Homo sapiens OX=9606 GN=ITSN1 PE=1 SV=3	Intersectin-1	ITSN1	47.79	1649.65	15.3	976	991	S11:Phosphorylation (STY):13.67	S986	DSGSSESPASLKR	80.7002	511.821
Q14839	Q14839|CHD4_HUMAN	T	TPT(+79.97)PSTPGDTQPNTPAPVPPAEDGIK	3	26	Chromodomain-helicase-DNA-binding protein 4 OS=Homo sapiens OX=9606 GN=CHD4 PE=1 SV=2	Chromodomain-helicase-DNA-binding protein 4	CHD4	57.39	2664.23	-2.8	1540	1565	T3:Phosphorylation (STY):9.40	T1542	PSPKTPTPSTPGD	5362.19	34018.2
O43379	O43379|WDR62_HUMAN	S	FATSLPHFPGC(+57.02)AGPTEDELSLPEGPSVPS(+79.97)SSLPQT(+79.97)PEQEK	29	40	WD repeat-containing protein 62 OS=Homo sapiens OX=9606 GN=WDR62 PE=1 SV=4	WD repeat-containing protein 62	WDR62	52.27	4379.92	1.1	1019	1058	C11:Carbamidomethylation:1000.00;S29:Phosphorylation (STY):0.00;T35:Phosphorylation (STY):17.91	S1047	EGPSVPSSSLPQT	4968.94	31551.2
O43379	O43379|WDR62_HUMAN	T	FATSLPHFPGC(+57.02)AGPTEDELSLPEGPSVPS(+79.97)SSLPQT(+79.97)PEQEK	35	40	WD repeat-containing protein 62 OS=Homo sapiens OX=9606 GN=WDR62 PE=1 SV=4	WD repeat-containing protein 62	WDR62	52.27	4379.92	1.1	1019	1058	C11:Carbamidomethylation:1000.00;S29:Phosphorylation (STY):0.00;T35:Phosphorylation (STY):17.91	T1053	SSSLPQTPEQEKF	4968.94	31551.2
Q86WB0	Q86WB0|ZC3C1_HUMAN	S	SWDSSS(+79.97)PVDRPEPEAAS(+79.97)PTTR	6	21	Zinc finger C3HC-type protein 1 OS=Homo sapiens OX=9606 GN=ZC3HC1 PE=1 SV=1	Zinc finger C3HC-type protein 1	ZC3HC1	64.5	2430.97	0	354	374	S6:Phosphorylation (STY):14.02;S17:Phosphorylation (STY):11.10	S359	RSWDSSSPVDRPE	2150.19	13698.8
Q86WB0	Q86WB0|ZC3C1_HUMAN	S	SWDSSS(+79.97)PVDRPEPEAAS(+79.97)PTTR	17	21	Zinc finger C3HC-type protein 1 OS=Homo sapiens OX=9606 GN=ZC3HC1 PE=1 SV=1	Zinc finger C3HC-type protein 1	ZC3HC1	64.5	2430.97	0	354	374	S6:Phosphorylation (STY):14.02;S17:Phosphorylation (STY):11.10	S370	PEPEAASPTTRTR	2150.19	13698.8
Q86U86	Q86U86|PB1_HUMAN	S	LSAITMALQYGSES(+79.97)EEDAALAAAR	14	24	Protein polybromo-1 OS=Homo sapiens OX=9606 GN=PBRM1 PE=1 SV=1	Protein polybromo-1	PBRM1	51.64	2547.16	-1	342	365	S14:Phosphorylation (STY):17.01	S355	LQYGSESEEDAAL	1551.45	9914.81
Q9Y2W2	Q9Y2W2|WBP11_HUMAN	S	GHDDDVSS(+79.97)TS(+79.97)EDDGYPEDMDQDK	8	23	WW domain-binding protein 11 OS=Homo sapiens OX=9606 GN=WBP11 PE=1 SV=1	WW domain-binding protein 11	WBP11	58.22	2715.87	0.8	244	266	S8:Phosphorylation (STY):0.00;S10:Phosphorylation (STY):0.00	S251	HDDDVSSTSEDDG	720.007	4614.37
Q9Y2W2	Q9Y2W2|WBP11_HUMAN	S	GHDDDVSS(+79.97)TS(+79.97)EDDGYPEDMDQDK	10	23	WW domain-binding protein 11 OS=Homo sapiens OX=9606 GN=WBP11 PE=1 SV=1	WW domain-binding protein 11	WBP11	58.22	2715.87	0.8	244	266	S8:Phosphorylation (STY):0.00;S10:Phosphorylation (STY):0.00	S253	DDVSSTSEDDGYP	720.007	4614.37
O60664	O60664|PLIN3_HUMAN	S	LGQMVLS(+79.97)GVDTVLGK	7	15	Perilipin-3 OS=Homo sapiens OX=9606 GN=PLIN3 PE=1 SV=3	Perilipin-3	PLIN3	63.01	1595.8	-0.2	181	195	S7:Phosphorylation (STY):28.70	S187	LGQMVLSGVDTVL	49.1816	315.318
Q6ICG6	Q6ICG6|K0930_HUMAN	S	NNRPAFFS(+79.97)PSLKR	8	13	Uncharacterized protein KIAA0930 OS=Homo sapiens OX=9606 GN=KIAA0930 PE=1 SV=1	Uncharacterized protein KIAA0930	KIAA0930	53.23	1612.79	1.4	297	309	S8:Phosphorylation (STY):32.28	S304	NRPAFFSPSLKRK	58.033	372.784
Q7Z6J0	Q7Z6J0|SH3R1_HUMAN	S	RHS(+79.97)FTSLTMANK	3	12	E3 ubiquitin-protein ligase SH3RF1 OS=Homo sapiens OX=9606 GN=SH3RF1 PE=1 SV=2	E3 ubiquitin-protein ligase SH3RF1	SH3RF1	56.01	1471.66	-2.9	302	313	S3:Phosphorylation (STY):12.81	S304	NTKKRHSFTSLTM	1345.67	8646.93
Q01082	Q01082|SPTB2_HUMAN	T	T(+79.97)SS(+79.97)KESS(+79.97)PIPS(+79.97)PTSDRK	1	17	Spectrin beta chain, non-erythrocytic 1 OS=Homo sapiens OX=9606 GN=SPTBN1 PE=1 SV=2	Spectrin beta chain, non-erythrocytic 1	SPTBN1	54.59	2122.77	1.4	2159	2175	T1:Phosphorylation (STY):0.00;S3:Phosphorylation (STY):12.28;S7:Phosphorylation (STY):12.28;S11:Phosphorylation (STY):22.85	T2159	GATEQRTSSKESS	10369.9	66796.2
Q01082	Q01082|SPTB2_HUMAN	S	T(+79.97)SS(+79.97)KESS(+79.97)PIPS(+79.97)PTSDRK	3	17	Spectrin beta chain, non-erythrocytic 1 OS=Homo sapiens OX=9606 GN=SPTBN1 PE=1 SV=2	Spectrin beta chain, non-erythrocytic 1	SPTBN1	54.59	2122.77	1.4	2159	2175	T1:Phosphorylation (STY):0.00;S3:Phosphorylation (STY):12.28;S7:Phosphorylation (STY):12.28;S11:Phosphorylation (STY):22.85	S2161	TEQRTSSKESSPI	10369.9	66796.2
Q01082	Q01082|SPTB2_HUMAN	S	T(+79.97)SS(+79.97)KESS(+79.97)PIPS(+79.97)PTSDRK	7	17	Spectrin beta chain, non-erythrocytic 1 OS=Homo sapiens OX=9606 GN=SPTBN1 PE=1 SV=2	Spectrin beta chain, non-erythrocytic 1	SPTBN1	54.59	2122.77	1.4	2159	2175	T1:Phosphorylation (STY):0.00;S3:Phosphorylation (STY):12.28;S7:Phosphorylation (STY):12.28;S11:Phosphorylation (STY):22.85	S2165	TSSKESSPIPSPT	10369.9	66796.2
Q01082	Q01082|SPTB2_HUMAN	S	T(+79.97)SS(+79.97)KESS(+79.97)PIPS(+79.97)PTSDRK	11	17	Spectrin beta chain, non-erythrocytic 1 OS=Homo sapiens OX=9606 GN=SPTBN1 PE=1 SV=2	Spectrin beta chain, non-erythrocytic 1	SPTBN1	54.59	2122.77	1.4	2159	2175	T1:Phosphorylation (STY):0.00;S3:Phosphorylation (STY):12.28;S7:Phosphorylation (STY):12.28;S11:Phosphorylation (STY):22.85	S2169	ESSPIPSPTSDRK	10369.9	66796.2
P41212	P41212|ETV6_HUMAN	S	LEHLES(+79.97)QELDEQIYQEDEC(+57.02)	6	19	Transcription factor ETV6 OS=Homo sapiens OX=9606 GN=ETV6 PE=1 SV=1	Transcription factor ETV6	ETV6	78.67	2485.98	-0.5	434	452	S6:Phosphorylation (STY):108.97;C19:Carbamidomethylation:1000.00	S439	RLEHLESQELDEQ	1937.62	12493.7
Q9UK76	Q9UK76|JUPI1_HUMAN	S	RNS(+79.97)SEASS(+79.97)GDFLDLK	3	15	Jupiter microtubule associated homolog 1 OS=Homo sapiens OX=9606 GN=JPT1 PE=1 SV=3	Jupiter microtubule associated homolog 1	JPT1	47.97	1784.7	3.7	85	99	S3:Phosphorylation (STY):0.00;S8:Phosphorylation (STY):11.06	S87	GLQRRNSSEASSG	357.032	2307.03
Q9UK76	Q9UK76|JUPI1_HUMAN	S	RNS(+79.97)SEASS(+79.97)GDFLDLK	8	15	Jupiter microtubule associated homolog 1 OS=Homo sapiens OX=9606 GN=JPT1 PE=1 SV=3	Jupiter microtubule associated homolog 1	JPT1	47.97	1784.7	3.7	85	99	S3:Phosphorylation (STY):0.00;S8:Phosphorylation (STY):11.06	S92	NSSEASSGDFLDL	357.032	2307.03
P55196	P55196|AFAD_HUMAN:Q6ZUT9|DEN5B_HUMAN	S	LQLS(+79.97)VTEVGTEK	4	12	Afadin OS=Homo sapiens OX=9606 GN=AFDN PE=1 SV=3	Afadin	AFDN	53.16	1382.67	-8	421	432	S4:Phosphorylation (STY):33.18	S424	LYRLQLSVTEVGT	559.21	3614.57
Q9NQC1	Q9NQC1|JADE2_HUMAN	S	ILPPLEGPPAQASPSSTMLGEGS(+79.97)QPDWPGGSR	23	32	E3 ubiquitin-protein ligase Jade-2 OS=Homo sapiens OX=9606 GN=JADE2 PE=1 SV=2	E3 ubiquitin-protein ligase Jade-2	JADE2	35.99	3295.52	-6.5	105	136	S23:Phosphorylation (STY):0.00	S127	TMLGEGSQPDWPG	81.8229	529.582
Q6FI81	Q6FI81|CPIN1_HUMAN	S	S(+79.97)SPSVKPAVDPAAAK	1	15	Anamorsin OS=Homo sapiens OX=9606 GN=CIAPIN1 PE=1 SV=2	Anamorsin	CIAPIN1	39.28	1503.73	2.3	182	196	S1:Phosphorylation (STY):0.00	S182	LSITKKSSPSVKP	712.631	4622.11
Q9P258	Q9P258|RCC2_HUMAN	S	C(+57.02)SSSSGGGS(+79.97)S(+79.97)GDEDGLELDGAPGGGK	9	26	Protein RCC2 OS=Homo sapiens OX=9606 GN=RCC2 PE=1 SV=2	Protein RCC2	RCC2	57.04	2498.88	-1.4	42	67	C1:Carbamidomethylation:1000.00;S9:Phosphorylation (STY):0.00;S10:Phosphorylation (STY):0.00	S50	SSSGGGSSGDEDG	1342.76	8716.61
Q9P258	Q9P258|RCC2_HUMAN	S	C(+57.02)SSSSGGGS(+79.97)S(+79.97)GDEDGLELDGAPGGGK	10	26	Protein RCC2 OS=Homo sapiens OX=9606 GN=RCC2 PE=1 SV=2	Protein RCC2	RCC2	57.04	2498.88	-1.4	42	67	C1:Carbamidomethylation:1000.00;S9:Phosphorylation (STY):0.00;S10:Phosphorylation (STY):0.00	S51	SSGGGSSGDEDGL	1342.76	8716.61
Q13310	Q13310|PABP4_HUMAN	S	EFS(+79.97)PFGSITSAK	3	12	Polyadenylate-binding protein 4 OS=Homo sapiens OX=9606 GN=PABPC4 PE=1 SV=1	Polyadenylate-binding protein 4	PABPC4	43.32	1349.59	-2	313	324	S3:Phosphorylation (STY):42.89	S315	KLRKEFSPFGSIT	33.0762	214.972
Q9H2P0	Q9H2P0|ADNP_HUMAN	S	LSNPQIEWQNSTIDS(+79.97)EDGEQFDNMTDGVAEPMHGSLAGVK	15	40	Activity-dependent neuroprotector homeobox protein OS=Homo sapiens OX=9606 GN=ADNP PE=1 SV=1	Activity-dependent neuroprotector homeobox protein	ADNP	23.49	4425.9	-7.7	1057	1096	S15:Phosphorylation (STY):0.00	S1071	QNSTIDSEDGEQF	1013.64	6595.51
Q9Y490	Q9Y490|TLN1_HUMAN	S	SKDHFGLEGDEESTMLEDSVS(+79.97)PK	21	23	Talin-1 OS=Homo sapiens OX=9606 GN=TLN1 PE=1 SV=3	Talin-1	TLN1	84	2616.09	-0.1	405	427	S21:Phosphorylation (STY):36.05	S425	MLEDSVSPKKSTV	4717.66	30859.1
Q9H694	Q9H694|BICC1_HUMAN	S	A(+42.01)AQGEPGYLAAQSDPGS(+79.97)NS(+79.97)ER	17	21	Protein bicaudal C homolog 1 OS=Homo sapiens OX=9606 GN=BICC1 PE=1 SV=2	Protein bicaudal C homolog 1	BICC1	47.72	2305.89	1.3	2	22	A1:Acetylation (Protein N-term):1000.00;S17:Phosphorylation (STY):24.67;S19:Phosphorylation (STY):17.45	S18	AQSDPGSNSERST	92.7571	608.491
Q9H694	Q9H694|BICC1_HUMAN	S	A(+42.01)AQGEPGYLAAQSDPGS(+79.97)NS(+79.97)ER	19	21	Protein bicaudal C homolog 1 OS=Homo sapiens OX=9606 GN=BICC1 PE=1 SV=2	Protein bicaudal C homolog 1	BICC1	47.72	2305.89	1.3	2	22	A1:Acetylation (Protein N-term):1000.00;S17:Phosphorylation (STY):24.67;S19:Phosphorylation (STY):17.45	S20	SDPGSNSERSTDS	92.7571	608.491
Q8NDI1	Q8NDI1|EHBP1_HUMAN	T	EVQTPQYLNPFDEPEAFVT(+79.97)IKDSPPQSTK	19	29	EH domain-binding protein 1 OS=Homo sapiens OX=9606 GN=EHBP1 PE=1 SV=3	EH domain-binding protein 1	EHBP1	57.46	3384.58	3.5	313	341	T19:Phosphorylation (STY):0.00	T331	EPEAFVTIKDSPP	1414.05	9281.14
Q96RK0	Q96RK0|CIC_HUMAN	S	LDSETES(+79.97)DHDDAFLSIMSPEIQLPLPPGK	7	29	Protein capicua homolog OS=Homo sapiens OX=9606 GN=CIC PE=1 SV=2	Protein capicua homolog	CIC	65.84	3260.48	0.9	140	168	S7:Phosphorylation (STY):2.44	S146	LDSETESDHDDAF	4397.67	28890
P11274	P11274|BCR_HUMAN	S	VSPS(+79.97)PTTYR	4	9	Breakpoint cluster region protein OS=Homo sapiens OX=9606 GN=BCR PE=1 SV=2	Breakpoint cluster region protein	BCR	28.56	1086.47	-2.1	353	361	S4:Phosphorylation (STY):14.04	S356	SSRVSPSPTTYRM	2817.6	18536.4
Q9UQ35	Q9UQ35|SRRM2_HUMAN	S	S(+79.97)RS(+79.97)LS(+79.97)S(+79.97)PR	1	8	Serine/arginine repetitive matrix protein 2 OS=Homo sapiens OX=9606 GN=SRRM2 PE=1 SV=2	Serine/arginine repetitive matrix protein 2	SRRM2	32.09	1208.34	-2.7	759	766		S759	RISSRRSRSLSSP	3252.02	21470.4
Q9UQ35	Q9UQ35|SRRM2_HUMAN	S	S(+79.97)RS(+79.97)LS(+79.97)S(+79.97)PR	3	8	Serine/arginine repetitive matrix protein 2 OS=Homo sapiens OX=9606 GN=SRRM2 PE=1 SV=2	Serine/arginine repetitive matrix protein 2	SRRM2	32.09	1208.34	-2.7	759	766		S761	SSRRSRSLSSPRS	3252.02	21470.4
Q9UQ35	Q9UQ35|SRRM2_HUMAN	S	S(+79.97)RS(+79.97)LS(+79.97)S(+79.97)PR	5	8	Serine/arginine repetitive matrix protein 2 OS=Homo sapiens OX=9606 GN=SRRM2 PE=1 SV=2	Serine/arginine repetitive matrix protein 2	SRRM2	32.09	1208.34	-2.7	759	766		S763	RRSRSLSSPRSKA	3252.02	21470.4
Q9UQ35	Q9UQ35|SRRM2_HUMAN	S	S(+79.97)RS(+79.97)LS(+79.97)S(+79.97)PR	6	8	Serine/arginine repetitive matrix protein 2 OS=Homo sapiens OX=9606 GN=SRRM2 PE=1 SV=2	Serine/arginine repetitive matrix protein 2	SRRM2	32.09	1208.34	-2.7	759	766		S764	RSRSLSSPRSKAK	3252.02	21470.4
Q15361	Q15361|TTF1_HUMAN	S	EAGTDMQES(+79.97)QPTVGLDDETPQLLGPTHK	9	28	Transcription termination factor 1 OS=Homo sapiens OX=9606 GN=TTF1 PE=1 SV=3	Transcription termination factor 1	TTF1	59.32	3073.36	4.2	245	272	S9:Phosphorylation (STY):6.63	S253	GTDMQESQPTVGL	76.393	504.844
P54821	P54821|PRRX1_HUMAN	S	SLLESPGLTS(+79.97)GSDTPQQDNDQLNSEEK	10	27	Paired mesoderm homeobox protein 1 OS=Homo sapiens OX=9606 GN=PRRX1 PE=1 SV=2	Paired mesoderm homeobox protein 1	PRRX1	71.1	2968.28	-1	63	89	S10:Phosphorylation (STY):0.00	S72	ESPGLTSGSDTPQ	1040.06	6881.2
Q9P260	Q9P260|RELCH_HUMAN	S	QS(+79.97)GTPPGMGAPGVPGAAGVGGAGGR	2	25	RAB11-binding protein RELCH OS=Homo sapiens OX=9606 GN=RELCH PE=1 SV=2	RAB11-binding protein RELCH	RELCH	53.93	2141.97	2.7	140	164	S2:Phosphorylation (STY):0.00	S141	GNFERQSGTPPGM	3284.31	21733.2
Q13427	Q13427|PPIG_HUMAN	S	IRSS(+79.97)VEK	4	7	Peptidyl-prolyl cis-trans isomerase G OS=Homo sapiens OX=9606 GN=PPIG PE=1 SV=2	Peptidyl-prolyl cis-trans isomerase G	PPIG	31.05	897.432	-0.7	714	720	S4:Phosphorylation (STY):9.34	S717	DEKIRSSVEKENQ	50312.4	333407
Q92545	Q92545|TM131_HUMAN	S	FLPNS(+79.97)QELGNTSSSEGEK	5	18	Transmembrane protein 131 OS=Homo sapiens OX=9606 GN=TMEM131 PE=1 SV=3	Transmembrane protein 131	TMEM131	27.2	2002.85	0.4	1540	1557	S5:Phosphorylation (STY):23.62	S1544	AKFLPNSQELGNT	137.116	911.74
P06400	P06400|RB_HUMAN	T	ISEGLPTPT(+79.97)K	9	10	Retinoblastoma-associated protein OS=Homo sapiens OX=9606 GN=RB1 PE=1 SV=2	Retinoblastoma-associated protein	RB1	34.69	1121.54	-7.2	815	824	T9:Phosphorylation (STY):0.00	T823	EGLPTPTKMTPRS	245.274	1634.51
Q8IXS8	Q8IXS8|HYCC2_HUMAN	S	HLS(+79.97)LPAGQVVPK	3	12	Hyccin 2 OS=Homo sapiens OX=9606 GN=HYCC2 PE=1 SV=1	Hyccin 2	HYCC2	32.32	1324.69	0.7	428	439		S430	PMKKHLSLPAGQV	30.3862	203.381
P06400	P06400|RB_HUMAN	T	ISEGLPT(+79.97)PTK	7	10	Retinoblastoma-associated protein OS=Homo sapiens OX=9606 GN=RB1 PE=1 SV=2	Retinoblastoma-associated protein	RB1	39.45	1121.54	-1.4	815	824	T7:Phosphorylation (STY):14.04	T821	ISEGLPTPTKMTP	245.274	1643.4
Q13586	Q13586|STIM1_HUMAN	S	SHSPS(+79.97)SPDPDTPSPVGDSR	5	19	Stromal interaction molecule 1 OS=Homo sapiens OX=9606 GN=STIM1 PE=1 SV=3	Stromal interaction molecule 1	STIM1	44.54	2000.81	1.2	616	634	S5:Phosphorylation (STY):0.00	S620	SRSHSPSSPDPDT	3229.56	21677.1
A8MPP1	A8MPP1|D11L8_HUMAN:Q96FC9|DDX11_HUMAN	Y	LEQLESGEEELVLAEY(+79.97)ESDEEK	16	22	Putative ATP-dependent RNA helicase DDX11-like protein 8 OS=Homo sapiens OX=9606 GN=DDX11L8 PE=1 SV=1	Putative ATP-dependent RNA helicase DDX11-like protein 8	DDX11L8	34.48	2647.13	-0.9	187	208	Y16:Phosphorylation (STY):0.00	Y202	ELVLAEYESDEEK	732.665	4919.88
Q13596	Q13596|SNX1_HUMAN	S	LPPPFPGLEPESEGAAGGS(+79.97)EPEAGDS(+79.97)DTEGEDIFTGAAVVSK	19	42	Sorting nexin-1 OS=Homo sapiens OX=9606 GN=SNX1 PE=1 SV=3	Sorting nexin-1	SNX1	84.95	4272.82	-0.9	14	55	S19:Phosphorylation (STY):18.61;S26:Phosphorylation (STY):0.00	S32	EGAAGGSEPEAGD	3871.88	26043.8
Q13596	Q13596|SNX1_HUMAN	S	LPPPFPGLEPESEGAAGGS(+79.97)EPEAGDS(+79.97)DTEGEDIFTGAAVVSK	26	42	Sorting nexin-1 OS=Homo sapiens OX=9606 GN=SNX1 PE=1 SV=3	Sorting nexin-1	SNX1	84.95	4272.82	-0.9	14	55	S19:Phosphorylation (STY):18.61;S26:Phosphorylation (STY):0.00	S39	EPEAGDSDTEGED	3871.88	26043.8
Q9NRF2	Q9NRF2|SH2B1_HUMAN	S	SS(+79.97)EDLAGPLPSSVSSSSTTSSKPK	2	24	SH2B adapter protein 1 OS=Homo sapiens OX=9606 GN=SH2B1 PE=1 SV=3	SH2B adapter protein 1	SH2B1	54.2	2415.11	-1.2	125	148	S2:Phosphorylation (STY):0.00	S126	LGPSRSSEDLAGP	187.041	1258.22
Q8WU20	Q8WU20|FRS2_HUMAN	T	T(+79.97)SVHVPLEAR	1	10	Fibroblast growth factor receptor substrate 2 OS=Homo sapiens OX=9606 GN=FRS2 PE=1 SV=4	Fibroblast growth factor receptor substrate 2	FRS2	25.8	1187.57	-0.2	210	219	T1:Phosphorylation (STY):0.00	T210	EERKNRTSVHVPL	138.143	931.555
Q9H7U1	Q9H7U1|CCSE2_HUMAN	S	LLHQHDGSGSLHDIQLSLPSS(+79.97)PEPEDGDK	21	29	Serine-rich coiled-coil domain-containing protein 2 OS=Homo sapiens OX=9606 GN=CCSER2 PE=1 SV=2	Serine-rich coiled-coil domain-containing protein 2	CCSER2	57.7	3187.45	-3.2	685	713	S21:Phosphorylation (STY):17.01	S705	QLSLPSSPEPEDG	900.36	6079.22
Q15032	Q15032|R3HD1_HUMAN	S	IQIQLTQS(+79.97)FEK	8	11	R3H domain-containing protein 1 OS=Homo sapiens OX=9606 GN=R3HDM1 PE=1 SV=3	R3H domain-containing protein 1	R3HDM1	52.64	1413.69	0.6	104	114	S8:Phosphorylation (STY):28.86	S111	QIQLTQSFEKEEK	75.538	512.259
Q9ULJ3	Q9ULJ3|ZBT21_HUMAN	T	ESEVC(+57.02)PVPT(+79.97)NSPS(+79.97)PPPLPPPPPLPK	9	25	Zinc finger and BTB domain-containing protein 21 OS=Homo sapiens OX=9606 GN=ZBTB21 PE=1 SV=2	Zinc finger and BTB domain-containing protein 21	ZBTB21	42.13	2789.28	-8	971	995	C5:Carbamidomethylation:1000.00;T9:Phosphorylation (STY):0.00;S13:Phosphorylation (STY):7.32	T979	EVCPVPTNSPSPP	1213.28	8244.71
Q9ULJ3	Q9ULJ3|ZBT21_HUMAN	S	ESEVC(+57.02)PVPT(+79.97)NSPS(+79.97)PPPLPPPPPLPK	13	25	Zinc finger and BTB domain-containing protein 21 OS=Homo sapiens OX=9606 GN=ZBTB21 PE=1 SV=2	Zinc finger and BTB domain-containing protein 21	ZBTB21	42.13	2789.28	-8	971	995	C5:Carbamidomethylation:1000.00;T9:Phosphorylation (STY):0.00;S13:Phosphorylation (STY):7.32	S983	VPTNSPSPPPLPP	1213.28	8244.71
P56945	P56945|BCAR1_HUMAN	Y	TPLVLAAPPPDSPPAEDVY(+79.97)DVPPPAPDLYDVPPGLR	19	36	Breast cancer anti-estrogen resistance protein 1 OS=Homo sapiens OX=9606 GN=BCAR1 PE=1 SV=2	Breast cancer anti-estrogen resistance protein 1	BCAR1	52.4	3826.87	1.9	344	379	Y19:Phosphorylation (STY):0.00	Y362	PPAEDVYDVPPPA	16444.1	111757
Q8WWI1	Q8WWI1|LMO7_HUMAN	S	TSTTGVATTQS(+79.97)PTPR	11	15	LIM domain only protein 7 OS=Homo sapiens OX=9606 GN=LMO7 PE=1 SV=3	LIM domain only protein 7	LMO7	58.99	1583.72	-9.4	1576	1590	S11:Phosphorylation (STY):22.85	S1586	GVATTQSPTPRSH	4096.62	27936.8
Q96ST2	Q96ST2|IWS1_HUMAN	S	GHHVTDSENDEPLNLNASDSES(+79.97)EELHR	22	27	Protein IWS1 homolog OS=Homo sapiens OX=9606 GN=IWS1 PE=1 SV=2	Protein IWS1 homolog	IWS1	73.25	3110.28	-2.5	63	89	S22:Phosphorylation (STY):0.00	S84	NASDSESEELHRQ	1875.95	12831.4
P46821	P46821|MAP1B_HUMAN	S	VSPSKS(+79.97)PSLSPSPPS(+79.97)PLEK	6	19	Microtubule-associated protein 1B OS=Homo sapiens OX=9606 GN=MAP1B PE=1 SV=2	Microtubule-associated protein 1B	MAP1B	57.52	2079.95	1.9	1251	1269	S6:Phosphorylation (STY):17.01;S15:Phosphorylation (STY):14.12	S1256	KVSPSKSPSLSPS	13870.1	95130.8
P46821	P46821|MAP1B_HUMAN	S	VSPSKS(+79.97)PSLSPSPPS(+79.97)PLEK	15	19	Microtubule-associated protein 1B OS=Homo sapiens OX=9606 GN=MAP1B PE=1 SV=2	Microtubule-associated protein 1B	MAP1B	57.52	2079.95	1.9	1251	1269	S6:Phosphorylation (STY):17.01;S15:Phosphorylation (STY):14.12	S1265	LSPSPPSPLEKTP	13870.1	95130.8
Q96JM2	Q96JM2|ZN462_HUMAN	S	VIIPS(+79.97)PPKDDSPQLSEELRR	5	20	Zinc finger protein 462 OS=Homo sapiens OX=9606 GN=ZNF462 PE=1 SV=3	Zinc finger protein 462	ZNF462	37.06	2355.18	0.1	1743	1762	S5:Phosphorylation (STY):56.47	S1747	NKVIIPSPPKDDS	53.9056	369.938
Q07021	Q07021|C1QBP_HUMAN	S	ALVLDC(+57.02)HYPEDEVGQEDEAES(+79.97)DIFSIR	21	27	Complement component 1 Q subcomponent-binding protein, mitochondrial OS=Homo sapiens OX=9606 GN=C1QBP PE=1 SV=1	Complement component 1 Q subcomponent-binding protein, mitochondrial	C1QBP	60.02	3215.36	-2.3	181	207	C6:Carbamidomethylation:1000.00;S21:Phosphorylation (STY):42.68	S201	QEDEAESDIFSIR	3330.89	22940.1
Q99666	Q99666|RGPD5_HUMAN:O14715|RGPD8_HUMAN:P49792|RBP2_HUMAN	T	DSLIT(+79.97)PHVS(+79.97)R	5	10	RANBP2-like and GRIP domain-containing protein 5/6 OS=Homo sapiens OX=9606 GN=RGPD6 PE=1 SV=3	RANBP2-like and GRIP domain-containing protein 5/6	RGPD6	48.84	1283.53	-2.9	1470	1479	T5:Phosphorylation (STY):29.32;S9:Phosphorylation (STY):36.40	T1474	EKDSLITPHVSRS	532.88	3673.54
Q99666	Q99666|RGPD5_HUMAN:O14715|RGPD8_HUMAN:P49792|RBP2_HUMAN	S	DSLIT(+79.97)PHVS(+79.97)R	9	10	RANBP2-like and GRIP domain-containing protein 5/6 OS=Homo sapiens OX=9606 GN=RGPD6 PE=1 SV=3	RANBP2-like and GRIP domain-containing protein 5/6	RGPD6	48.84	1283.53	-2.9	1470	1479	T5:Phosphorylation (STY):29.32;S9:Phosphorylation (STY):36.40	S1478	LITPHVSRSSTPR	532.88	3673.54
Q15185	Q15185|TEBP_HUMAN	S	FSEMM(+15.99)NNMGGDEDVDLPEVDGADDDSQDS(+79.97)DDEKMPDLE	29	38	Prostaglandin E synthase 3 OS=Homo sapiens OX=9606 GN=PTGES3 PE=1 SV=1	Prostaglandin E synthase 3	PTGES3	107.5	4301.56	1.1	123	160	M5:Oxidation (M):12.28;S29:Phosphorylation (STY):16.66	S151	DDDSQDSDDEKMP	18833.1	129883
Q14C86	Q14C86|GAPD1_HUMAN	S	ELPPAAAIGATS(+79.97)LVAAPHSSSSSPSKDSSR	12	30	GTPase-activating protein and VPS9 domain-containing protein 1 OS=Homo sapiens OX=9606 GN=GAPVD1 PE=1 SV=2	GTPase-activating protein and VPS9 domain-containing protein 1	GAPVD1	36.37	2957.41	3.1	928	957	S12:Phosphorylation (STY):0.00	S939	AAIGATSLVAAPH	623.947	4307.28
P01889	P01889|HLAB_HUMAN	S	GGSYSQAAC(+57.02)SDS(+79.97)AQGS(+79.97)DVSLTA	12	22	HLA class I histocompatibility antigen, B alpha chain OS=Homo sapiens OX=9606 GN=HLA-B PE=1 SV=3	HLA class I histocompatibility antigen, B alpha chain	HLA-B	53.7	2277.81	0.6	341	362	C9:Carbamidomethylation:1000.00;S12:Phosphorylation (STY):17.01;S16:Phosphorylation (STY):3.29	S352	QAACSDSAQGSDV	616.909	4264.27
P01889	P01889|HLAB_HUMAN	S	GGSYSQAAC(+57.02)SDS(+79.97)AQGS(+79.97)DVSLTA	16	22	HLA class I histocompatibility antigen, B alpha chain OS=Homo sapiens OX=9606 GN=HLA-B PE=1 SV=3	HLA class I histocompatibility antigen, B alpha chain	HLA-B	53.7	2277.81	0.6	341	362	C9:Carbamidomethylation:1000.00;S12:Phosphorylation (STY):17.01;S16:Phosphorylation (STY):3.29	S356	SDSAQGSDVSLTA	616.909	4264.27
Q13263	Q13263|TIF1B_HUMAN	S	EEDGS(+79.97)LSLDGADSTGVVAK	5	19	Transcription intermediary factor 1-beta OS=Homo sapiens OX=9606 GN=TRIM28 PE=1 SV=5	Transcription intermediary factor 1-beta	TRIM28	63.89	1928.83	-0.5	677	695	S5:Phosphorylation (STY):33.18	S681	LKEEDGSLSLDGA	2428.02	16816.7
P24534	P24534|EF1B_HUMAN	T	YGPADVEDT(+79.97)TGSGATDSKDDDDIDLFGS(+79.97)DDEEESEEAK	9	38	Elongation factor 1-beta OS=Homo sapiens OX=9606 GN=EEF1B2 PE=1 SV=3	Elongation factor 1-beta	EEF1B2	39.58	4183.55	3.1	79	116	T9:Phosphorylation (STY):0.00;S28:Phosphorylation (STY):9.45	T87	PADVEDTTGSGAT	11986.3	83116
P24534	P24534|EF1B_HUMAN	S	YGPADVEDT(+79.97)TGSGATDSKDDDDIDLFGS(+79.97)DDEEESEEAK	28	38	Elongation factor 1-beta OS=Homo sapiens OX=9606 GN=EEF1B2 PE=1 SV=3	Elongation factor 1-beta	EEF1B2	39.58	4183.55	3.1	79	116	T9:Phosphorylation (STY):0.00;S28:Phosphorylation (STY):9.45	S106	DIDLFGSDDEEES	11986.3	83116
Q08AE8	Q08AE8|SPIR1_HUMAN	S	STSSSSVSPS(+79.97)FPEEPVLEAVSTR	10	23	Protein spire homolog 1 OS=Homo sapiens OX=9606 GN=SPIRE1 PE=1 SV=3	Protein spire homolog 1	SPIRE1	40.24	2459.11	-1.2	475	497	S10:Phosphorylation (STY):0.00	S484	SSSVSPSFPEEPV	532.556	3708.62
Q8N163	Q8N163|CCAR2_HUMAN	S	S(+79.97)VASNQS(+79.97)EMEFSSLQDM(+15.99)PK	1	19	Cell cycle and apoptosis regulator protein 2 OS=Homo sapiens OX=9606 GN=CCAR2 PE=1 SV=2	Cell cycle and apoptosis regulator protein 2	CCAR2	44.17	2289.86	1.5	675	693	S1:Phosphorylation (STY):0.00;S7:Phosphorylation (STY):12.33;M17:Oxidation (M):40.94	S675	EDSEVRSVASNQS	39.7134	277.569
Q8N163	Q8N163|CCAR2_HUMAN	S	S(+79.97)VASNQS(+79.97)EMEFSSLQDM(+15.99)PK	7	19	Cell cycle and apoptosis regulator protein 2 OS=Homo sapiens OX=9606 GN=CCAR2 PE=1 SV=2	Cell cycle and apoptosis regulator protein 2	CCAR2	44.17	2289.86	1.5	675	693	S1:Phosphorylation (STY):0.00;S7:Phosphorylation (STY):12.33;M17:Oxidation (M):40.94	S681	SVASNQSEMEFSS	39.7134	277.569
P50570	P50570|DYN2_HUMAN	S	EALNIIGDISTSTVSTPVPPPVDDTWLQSASS(+79.97)HSPTPQR	32	39	Dynamin-2 OS=Homo sapiens OX=9606 GN=DNM2 PE=1 SV=2	Dynamin-2	DNM2	67.7	4180	0.7	731	769	S32:Phosphorylation (STY):0.00	S762	WLQSASSHSPTPQ	1434.15	10033.8
P84074	P84074|HPCA_HUMAN:P37235|HPCL1_HUMAN	S	LLQC(+57.02)DPS(+79.97)SASQF	7	12	Neuron-specific calcium-binding protein hippocalcin OS=Homo sapiens OX=9606 GN=HPCA PE=1 SV=2	Neuron-specific calcium-binding protein hippocalcin	HPCA	24.98	1431.57	2.2	182	193	C4:Carbamidomethylation:1000.00;S7:Phosphorylation (STY):11.06	S188	LLQCDPSSASQF_	89.3788	625.62
Q02078	Q02078|MEF2A_HUMAN	T	VMPT(+79.97)KSPPPPGGGNLGMNSR	4	20	Myocyte-specific enhancer factor 2A OS=Homo sapiens OX=9606 GN=MEF2A PE=1 SV=1	Myocyte-specific enhancer factor 2A	MEF2A	52.98	2072.95	1.4	250	269	T4:Phosphorylation (STY):0.00	T253	LGKVMPTKSPPPP	1424.84	10007.6
P39880	P39880|CUX1_HUMAN	S	TSASC(+57.02)SPAPES(+79.97)PMSSSESVK	11	20	Homeobox protein cut-like 1 OS=Homo sapiens OX=9606 GN=CUX1 PE=1 SV=3	Homeobox protein cut-like 1	CUX1	59.71	2104.83	2.4	1049	1068	C5:Carbamidomethylation:1000.00;S11:Phosphorylation (STY):34.94	S1059	CSPAPESPMSSSE	294.305	2069.24
P48681	P48681|NEST_HUMAN	T	SAGQENLETLKSPET(+79.97)QAPLWTPEEINQGAMNPLEK	15	35	Nestin OS=Homo sapiens OX=9606 GN=NES PE=1 SV=2	Nestin	NES	71.22	3929.84	4.5	831	865	T15:Phosphorylation (STY):0.00	T845	TLKSPETQAPLWT	2207.13	15532.4
Q02952	P78362|SRPK2_HUMAN:Q02952|AKA12_HUMAN	S	KGLSS(+79.97)DLEGEK	5	11	A-kinase anchor protein 12 OS=Homo sapiens OX=9606 GN=AKAP12 PE=1 SV=4	A-kinase anchor protein 12	AKAP12	42.59	1241.55	-2.6	1494	1504	S5:Phosphorylation (STY):21.94	S1498	TKKGLSSDLEGEK	3884.3	27345.1
Q13112	Q13112|CAF1B_HUMAN	T	TQDPSSPGT(+79.97)TPPQAR	9	15	Chromatin assembly factor 1 subunit B OS=Homo sapiens OX=9606 GN=CHAF1B PE=1 SV=1	Chromatin assembly factor 1 subunit B	CHAF1B	50.57	1618.7	-1.8	424	438	T9:Phosphorylation (STY):0.00	T432	DPSSPGTTPPQAR	494.409	3486.07
Q12789	Q12789|TF3C1_HUMAN	S	RAS(+79.97)WASENGETDAEGTQM(+15.99)TPAK	3	22	General transcription factor 3C polypeptide 1 OS=Homo sapiens OX=9606 GN=GTF3C1 PE=1 SV=4	General transcription factor 3C polypeptide 1	GTF3C1	41.32	2432	-3.4	1863	1884	S3:Phosphorylation (STY):0.00;M18:Oxidation (M):1000.00	S1865	GTKRRASWASENG	75.1905	531.526
Q9Y653	Q9Y653|AGRG1_HUMAN	S	LPISS(+79.97)GSTSSSRI	5	13	Adhesion G-protein coupled receptor G1 OS=Homo sapiens OX=9606 GN=ADGRG1 PE=1 SV=2	Adhesion G-protein coupled receptor G1	ADGRG1	37.91	1370.64	-5.6	681	693	S5:Phosphorylation (STY):0.00	S685	ARLPISSGSTSSS	91.6247	648.9
Q9HAW4	Q9HAW4|CLSPN_HUMAN	S	VLQDSDS(+79.97)ETEDTNASPEK	7	18	Claspin OS=Homo sapiens OX=9606 GN=CLSPN PE=1 SV=3	Claspin	CLSPN	45.46	2043.82	0.4	61	78	S7:Phosphorylation (STY):4.64	S67	VLQDSDSETEDTN	232.174	1644.4
Q9C0C2	Q9C0C2|TB182_HUMAN	S	AS(+79.97)PEPPGPESSSR	2	13	182 kDa tankyrase-1-binding protein OS=Homo sapiens OX=9606 GN=TNKS1BP1 PE=1 SV=4	182 kDa tankyrase-1-binding protein	TNKS1BP1	62	1376.56	-0.2	671	683	S2:Phosphorylation (STY):133.45	S672	QDLCRASPEPPGP	45751.4	324664
Q15154	Q15154|PCM1_HUMAN	T	KDEET(+79.97)EESEYDSEHENS(+79.97)EPVTNIR	5	24	Pericentriolar material 1 protein OS=Homo sapiens OX=9606 GN=PCM1 PE=1 SV=5	Pericentriolar material 1 protein	PCM1	22.18	3025.14	1.2	526	549	T5:Phosphorylation (STY):5.77;S17:Phosphorylation (STY):0.00	T530	NRKDEETEESEYD	1390.35	9891.87
Q15154	Q15154|PCM1_HUMAN	S	KDEET(+79.97)EESEYDSEHENS(+79.97)EPVTNIR	17	24	Pericentriolar material 1 protein OS=Homo sapiens OX=9606 GN=PCM1 PE=1 SV=5	Pericentriolar material 1 protein	PCM1	22.18	3025.14	1.2	526	549	T5:Phosphorylation (STY):5.77;S17:Phosphorylation (STY):0.00	S542	DSEHENSEPVTNI	1390.35	9891.87
O14595	O14595|CTDS2_HUMAN	T	AQHVGQSSSST(+79.97)ELAAYK	11	17	Carboxy-terminal domain RNA polymerase II polypeptide A small phosphatase 2 OS=Homo sapiens OX=9606 GN=CTDSP2 PE=1 SV=2	Carboxy-terminal domain RNA polymerase II polypeptide A small phosphatase 2	CTDSP2	28.48	1842.81	5.6	47	63	T11:Phosphorylation (STY):0.00	T57	GQSSSSTELAAYK	127.19	908.572
Q9BTC0	Q9BTC0|DIDO1_HUMAN	T	YPLC(+57.02)SADAAVSTT(+79.97)PPGSPPPPPPLPEPPVLK	13	31	Death-inducer obliterator 1 OS=Homo sapiens OX=9606 GN=DIDO1 PE=1 SV=5	Death-inducer obliterator 1	DIDO1	59.55	3228.58	0.4	1244	1274	C4:Carbamidomethylation:1000.00;T13:Phosphorylation (STY):22.85	T1256	DAAVSTTPPGSPP	1471.67	10520.4
O60256	O60256|KPRB_HUMAN	S	LGIAVIHGEAQDAES(+79.97)DLVDGRHSPPMVR	15	28	Phosphoribosyl pyrophosphate synthase-associated protein 2 OS=Homo sapiens OX=9606 GN=PRPSAP2 PE=1 SV=1	Phosphoribosyl pyrophosphate synthase-associated protein 2	PRPSAP2	59.39	3048.45	-2.3	205	232	S15:Phosphorylation (STY):0.00	S219	EAQDAESDLVDGR	19941.4	142568
P48730	P48730|KC1D_HUMAN	T	GTQEVAPPTPLTPTSHTANT(+79.97)SPRPVSGMER	20	30	Casein kinase I isoform delta OS=Homo sapiens OX=9606 GN=CSNK1D PE=1 SV=2	Casein kinase I isoform delta	CSNK1D	32.53	3195.5	-3.5	336	365	T20:Phosphorylation (STY):0.00	T355	TSHTANTSPRPVS	168.748	1207.26
P24534	P24534|EF1B_HUMAN	S	YGPADVEDTTGSGATDS(+79.97)KDDDDIDLFGSDDEEESEEAKR	17	39	Elongation factor 1-beta OS=Homo sapiens OX=9606 GN=EEF1B2 PE=1 SV=3	Elongation factor 1-beta	EEF1B2	69.2	4259.68	0.1	79	117	S17:Phosphorylation (STY):1.33	S95	GSGATDSKDDDDI	3214.17	23050.3
Q12906	Q12906|ILF3_HUMAN	Y	SGGNSY(+79.97)GSGGASYNPGSHGGYGGGSGGGSSYQGK	6	34	Interleukin enhancer-binding factor 3 OS=Homo sapiens OX=9606 GN=ILF3 PE=1 SV=3	Interleukin enhancer-binding factor 3	ILF3	22.77	3091.2	0.4	816	849	Y6:Phosphorylation (STY):0.00	Y821	RSGGNSYGSGGAS	35.9051	257.706
O95613	O95613|PCNT_HUMAN	S	DVEDFITTSFDSQETLSS(+79.97)PPPGLEGK	18	26	Pericentrin OS=Homo sapiens OX=9606 GN=PCNT PE=1 SV=4	Pericentrin	PCNT	50.35	2875.27	0	2310	2335	S18:Phosphorylation (STY):17.01	S2327	SQETLSSPPPGLE	131.801	946.319
Q99590	Q99590|SCAFB_HUMAN	S	KRPQSPS(+79.97)PR	7	9	Protein SCAF11 OS=Homo sapiens OX=9606 GN=SCAF11 PE=1 SV=2	Protein SCAF11	SCAF11	39.36	1131.55	-1.9	812	820	S7:Phosphorylation (STY):41.83	S818	KRPQSPSPRRETG	173.928	1249.15
Q5TCZ1	Q5TCZ1|SPD2A_HUMAN	S	RSS(+79.97)SDLITLPATTPPC(+57.02)PTK	3	19	SH3 and PX domain-containing protein 2A OS=Homo sapiens OX=9606 GN=SH3PXD2A PE=1 SV=1	SH3 and PX domain-containing protein 2A	SH3PXD2A	49.06	2121.02	-7	817	835	S3:Phosphorylation (STY):0.00;C16:Carbamidomethylation:1000.00	S819	EGSRRSSSDLITL	75.7914	545.171
Q3V6T2	Q3V6T2|GRDN_HUMAN	S	TGS(+79.97)PGSEVVTLQQFLEESNK	3	20	Girdin OS=Homo sapiens OX=9606 GN=CCDC88A PE=1 SV=2	Girdin	CCDC88A	66.18	2229.02	1.6	1673	1692	S3:Phosphorylation (STY):0.00	S1675	HKIKTGSPGSEVV	5325.03	38434.4
Q5VWN6	Q5VWN6|TASO2_HUMAN	T	SNSGSDLT(+79.97)VSQDEESLVPC(+57.02)SQAPAK	8	25	Protein TASOR 2 OS=Homo sapiens OX=9606 GN=TASOR2 PE=1 SV=1	Protein TASOR 2	TASOR2	23.3	2685.15	-3.2	605	629	T8:Phosphorylation (STY):0.00;C19:Carbamidomethylation:1000.00	T612	NSGSDLTVSQDEE	273.601	1982.33
Q659A1	Q659A1|ICE2_HUMAN	S	VSKS(+79.97)PSPASTSTVPNMTDAPTAPK	4	24	Little elongation complex subunit 2 OS=Homo sapiens OX=9606 GN=ICE2 PE=1 SV=2	Little elongation complex subunit 2	ICE2	46.8	2450.14	-9.1	413	436	S4:Phosphorylation (STY):14.04	S416	TTKVSKSPSPAST	87.6329	636.266
P08651	P08651|NFIC_HUMAN	S	SGSMEEDVDTSPGGDYYTSPS(+79.97)SPTSSSR	21	28	Nuclear factor 1 C-type OS=Homo sapiens OX=9606 GN=NFIC PE=1 SV=2	Nuclear factor 1 C-type	NFIC	76.14	2962.13	-0.8	284	311	S21:Phosphorylation (STY):0.00	S304	DYYTSPSSPTSSS	13756.7	99966.7
O95365	O95365|ZBT7A_HUMAN	S	AGAAAGDS(+79.97)DEESR	8	13	Zinc finger and BTB domain-containing protein 7A OS=Homo sapiens OX=9606 GN=ZBTB7A PE=1 SV=1	Zinc finger and BTB domain-containing protein 7A	ZBTB7A	57.37	1314.47	-4.1	330	342	S8:Phosphorylation (STY):44.28	S337	GAAAGDSDEESRA	45.1823	328.601
A0A1B0GTU1	A0A1B0GTU1|ZC11B_HUMAN:O75152|ZC11A_HUMAN	S	DSLVLPPTQSSS(+79.97)DSSPPEVSGPSSSQMSMK	12	30	Zinc finger CCCH domain-containing protein 11B OS=Homo sapiens OX=9606 GN=ZC3H11B PE=4 SV=1	Zinc finger CCCH domain-containing protein 11B	ZC3H11B	53.25	3128.36	1.1	725	754	S12:Phosphorylation (STY):0.00	S736	PPTQSSSDSSPPE	713.681	5198.31
Q13435	Q13435|SF3B2_HUMAN	S	S(+79.97)SLGQS(+79.97)AS(+79.97)ETEEDTVSVSK	1	19	Splicing factor 3B subunit 2 OS=Homo sapiens OX=9606 GN=SF3B2 PE=1 SV=2	Splicing factor 3B subunit 2	SF3B2	74.85	2179.78	2	302	320	S1:Phosphorylation (STY):0.00;S6:Phosphorylation (STY):18.33;S8:Phosphorylation (STY):22.85	S302	METDARSSLGQSA	922.633	6720.88
Q13435	Q13435|SF3B2_HUMAN	S	S(+79.97)SLGQS(+79.97)AS(+79.97)ETEEDTVSVSK	6	19	Splicing factor 3B subunit 2 OS=Homo sapiens OX=9606 GN=SF3B2 PE=1 SV=2	Splicing factor 3B subunit 2	SF3B2	74.85	2179.78	2	302	320	S1:Phosphorylation (STY):0.00;S6:Phosphorylation (STY):18.33;S8:Phosphorylation (STY):22.85	S307	RSSLGQSASETEE	922.633	6720.88
Q13435	Q13435|SF3B2_HUMAN	S	S(+79.97)SLGQS(+79.97)AS(+79.97)ETEEDTVSVSK	8	19	Splicing factor 3B subunit 2 OS=Homo sapiens OX=9606 GN=SF3B2 PE=1 SV=2	Splicing factor 3B subunit 2	SF3B2	74.85	2179.78	2	302	320	S1:Phosphorylation (STY):0.00;S6:Phosphorylation (STY):18.33;S8:Phosphorylation (STY):22.85	S309	SLGQSASETEEDT	922.633	6720.88
O60381	O60381|HBP1_HUMAN	S	SS(+79.97)PVHIIATSK	2	11	HMG box-containing protein 1 OS=Homo sapiens OX=9606 GN=HBP1 PE=1 SV=2	HMG box-containing protein 1	HBP1	20.97	1218.6	-0.6	134	144	S2:Phosphorylation (STY):0.00	S135	SFYNRSSPVHIIA	307.252	2239.53
Q9Y678	Q9Y678|COPG1_HUMAN	T	DC(+57.02)DPTTGET(+79.97)DDEGYEDEYVLEDLEVTVADHIQK	9	33	Coatomer subunit gamma-1 OS=Homo sapiens OX=9606 GN=COPG1 PE=1 SV=1	Coatomer subunit gamma-1	COPG1	24.26	3879.57	5.5	734	766	C2:Carbamidomethylation:1000.00;T9:Phosphorylation (STY):1.86	T742	DPTTGETDDEGYE	543.154	3961
Q9HAU0	Q9HAU0|PKHA5_HUMAN	T	AKSPT(+79.97)PESSTIASYVTLR	5	18	Pleckstrin homology domain-containing family A member 5 OS=Homo sapiens OX=9606 GN=PLEKHA5 PE=1 SV=1	Pleckstrin homology domain-containing family A member 5	PLEKHA5	62.81	1986.97	-4.7	853	870	T5:Phosphorylation (STY):0.00	T857	PRAKSPTPESSTI	926.327	6760.44
Q5TCZ1	Q5TCZ1|SPD2A_HUMAN	S	RS(+79.97)SSDLITLPATTPPC(+57.02)PTK	2	19	SH3 and PX domain-containing protein 2A OS=Homo sapiens OX=9606 GN=SH3PXD2A PE=1 SV=1	SH3 and PX domain-containing protein 2A	SH3PXD2A	47.06	2121.02	-6.4	817	835	S2:Phosphorylation (STY):0.00;C16:Carbamidomethylation:1000.00	S818	SEGSRRSSSDLIT	76.5923	559.384
O14980	O14980|XPO1_HUMAN	T	ESPFST(+79.97)SASPLLSGSQHFDVPPR	6	23	Exportin-1 OS=Homo sapiens OX=9606 GN=XPO1 PE=1 SV=1	Exportin-1	XPO1	42.6	2522.15	-6.3	383	405	T6:Phosphorylation (STY):0.00	T388	RESPFSTSASPLL	1807.18	13202.6
Q8N3X6	Q8N3X6|LCORL_HUMAN	S	RELDS(+79.97)WRHR	5	9	Ligand-dependent nuclear receptor corepressor-like protein OS=Homo sapiens OX=9606 GN=LCORL PE=1 SV=4	Ligand-dependent nuclear receptor corepressor-like protein	LCORL	25.31	1333.6	13.5	38	46		S42	FRRELDSWRHRLM	281.423	2056.17
Q8NE71	Q8NE71|ABCF1_HUMAN	S	KLS(+79.97)VPTSDEEDEVPAPKPR	3	19	ATP-binding cassette sub-family F member 1 OS=Homo sapiens OX=9606 GN=ABCF1 PE=1 SV=2	ATP-binding cassette sub-family F member 1	ABCF1	57.27	2173.03	-1	103	121	S3:Phosphorylation (STY):16.66	S105	ERLKKLSVPTSDE	4745.94	34721.2
Q9UNF0	Q9UNF0|PACN2_HUMAN	T	TQSYPT(+79.97)DWSDDESNNPFSSTDANGDSNPFDDDATSGTEVR	6	40	Protein kinase C and casein kinase substrate in neurons protein 2 OS=Homo sapiens OX=9606 GN=PACSIN2 PE=1 SV=2	Protein kinase C and casein kinase substrate in neurons protein 2	PACSIN2	71.6	4420.69	1.8	391	430	T6:Phosphorylation (STY):0.00	T396	KTQSYPTDWSDDE	13626.4	99821.7
Q96ST2	Q96ST2|IWS1_HUMAN	S	MS(+79.97)DSES(+79.97)EELPKPQVSDSES(+79.97)EEPPR	2	24	Protein IWS1 homolog OS=Homo sapiens OX=9606 GN=IWS1 PE=1 SV=2	Protein IWS1 homolog	IWS1	43.05	2928.07	0.4	208	231	S2:Phosphorylation (STY):7.32;S6:Phosphorylation (STY):0.00;S19:Phosphorylation (STY):6.59	S209	PPKPRMSDSESEE	125.287	918.602
Q96ST2	Q96ST2|IWS1_HUMAN	S	MS(+79.97)DSES(+79.97)EELPKPQVSDSES(+79.97)EEPPR	6	24	Protein IWS1 homolog OS=Homo sapiens OX=9606 GN=IWS1 PE=1 SV=2	Protein IWS1 homolog	IWS1	43.05	2928.07	0.4	208	231	S2:Phosphorylation (STY):7.32;S6:Phosphorylation (STY):0.00;S19:Phosphorylation (STY):6.59	S213	RMSDSESEELPKP	125.287	918.602
Q96ST2	Q96ST2|IWS1_HUMAN	S	MS(+79.97)DSES(+79.97)EELPKPQVSDSES(+79.97)EEPPR	19	24	Protein IWS1 homolog OS=Homo sapiens OX=9606 GN=IWS1 PE=1 SV=2	Protein IWS1 homolog	IWS1	43.05	2928.07	0.4	208	231	S2:Phosphorylation (STY):7.32;S6:Phosphorylation (STY):0.00;S19:Phosphorylation (STY):6.59	S226	QVSDSESEEPPRH	125.287	918.602
P55884	P55884|EIF3B_HUMAN	S	ALENGDADEPS(+79.97)FSDPEDFVDDVS(+79.97)EEELLGDVLK	11	33	Eukaryotic translation initiation factor 3 subunit B OS=Homo sapiens OX=9606 GN=EIF3B PE=1 SV=3	Eukaryotic translation initiation factor 3 subunit B	EIF3B	45.25	3754.52	-0.2	142	174	S11:Phosphorylation (STY):0.00;S23:Phosphorylation (STY):17.73	S152	GDADEPSFSDPED	224.237	1644.69
P55884	P55884|EIF3B_HUMAN	S	ALENGDADEPS(+79.97)FSDPEDFVDDVS(+79.97)EEELLGDVLK	23	33	Eukaryotic translation initiation factor 3 subunit B OS=Homo sapiens OX=9606 GN=EIF3B PE=1 SV=3	Eukaryotic translation initiation factor 3 subunit B	EIF3B	45.25	3754.52	-0.2	142	174	S11:Phosphorylation (STY):0.00;S23:Phosphorylation (STY):17.73	S164	DFVDDVSEEELLG	224.237	1644.69
P24928	P24928|RPB1_HUMAN	Y	YTPTSPSY(+79.97)S(+79.97)PSSPEYTPTSPK	8	21	DNA-directed RNA polymerase II subunit RPB1 OS=Homo sapiens OX=9606 GN=POLR2A PE=1 SV=2	DNA-directed RNA polymerase II subunit RPB1	POLR2A	37.68	2432.97	-0.4	1839	1859	Y8:Phosphorylation (STY):0.00;S9:Phosphorylation (STY):5.47	Y1846	TPTSPSYSPSSPE	548.23	4029.07
P24928	P24928|RPB1_HUMAN	S	YTPTSPSY(+79.97)S(+79.97)PSSPEYTPTSPK	9	21	DNA-directed RNA polymerase II subunit RPB1 OS=Homo sapiens OX=9606 GN=POLR2A PE=1 SV=2	DNA-directed RNA polymerase II subunit RPB1	POLR2A	37.68	2432.97	-0.4	1839	1859	Y8:Phosphorylation (STY):0.00;S9:Phosphorylation (STY):5.47	S1847	PTSPSYSPSSPEY	548.23	4029.07
Q9BTC0	Q9BTC0|DIDO1_HUMAN	S	SMPVSLEDSGEPTSC(+57.02)PATDAETASEGS(+79.97)VESASETR	27	35	Death-inducer obliterator 1 OS=Homo sapiens OX=9606 GN=DIDO1 PE=1 SV=5	Death-inducer obliterator 1	DIDO1	79.61	3650.48	-0.1	88	122	C15:Carbamidomethylation:1000.00;S27:Phosphorylation (STY):3.64	S114	ETASEGSVESASE	1107.38	8143.13
Q9BPX3	Q9BPX3|CND3_HUMAN	S	C(+57.02)QTAEADS(+79.97)ES(+79.97)DHEVPEPESEMK	8	22	Condensin complex subunit 3 OS=Homo sapiens OX=9606 GN=NCAPG PE=1 SV=1	Condensin complex subunit 3	NCAPG	49.84	2663.93	-2	966	987	C1:Carbamidomethylation:1000.00;S8:Phosphorylation (STY):16.94;S10:Phosphorylation (STY):18.61	S973	QTAEADSESDHEV	3575.05	26301.6
Q9BPX3	Q9BPX3|CND3_HUMAN	S	C(+57.02)QTAEADS(+79.97)ES(+79.97)DHEVPEPESEMK	10	22	Condensin complex subunit 3 OS=Homo sapiens OX=9606 GN=NCAPG PE=1 SV=1	Condensin complex subunit 3	NCAPG	49.84	2663.93	-2	966	987	C1:Carbamidomethylation:1000.00;S8:Phosphorylation (STY):16.94;S10:Phosphorylation (STY):18.61	S975	AEADSESDHEVPE	3575.05	26301.6
Q02952	Q02952|AKA12_HUMAN	S	GALNGQGALNS(+79.97)QEEEEVIVTEVGQR	11	25	A-kinase anchor protein 12 OS=Homo sapiens OX=9606 GN=AKAP12 PE=1 SV=4	A-kinase anchor protein 12	AKAP12	83.58	2706.25	3.4	86	110	S11:Phosphorylation (STY):153.19	S96	GQGALNSQEEEEV	336.085	2477.33
P28715	P28715|ERCC5_HUMAN	S	INS(+79.97)STENSDEGLK	3	13	DNA excision repair protein ERCC-5 OS=Homo sapiens OX=9606 GN=ERCC5 PE=1 SV=3	DNA excision repair protein ERCC-5	ERCC5	50.64	1472.6	1.5	421	433	S3:Phosphorylation (STY):21.94	S423	EEMRINSSTENSD	192.975	1422.48
P46821	P46821|MAP1B_HUMAN	S	VSPSKSPS(+79.97)LSPSPPS(+79.97)PLEK	8	19	Microtubule-associated protein 1B OS=Homo sapiens OX=9606 GN=MAP1B PE=1 SV=2	Microtubule-associated protein 1B	MAP1B	35.27	2079.95	-2.4	1251	1269	S8:Phosphorylation (STY):14.04;S15:Phosphorylation (STY):12.33	S1258	SPSKSPSLSPSPP	12868.9	94901.1
P46821	P46821|MAP1B_HUMAN	S	VSPSKSPS(+79.97)LSPSPPS(+79.97)PLEK	15	19	Microtubule-associated protein 1B OS=Homo sapiens OX=9606 GN=MAP1B PE=1 SV=2	Microtubule-associated protein 1B	MAP1B	35.27	2079.95	-2.4	1251	1269	S8:Phosphorylation (STY):14.04;S15:Phosphorylation (STY):12.33	S1265	LSPSPPSPLEKTP	12868.9	94901.1
Q9BV36	Q9BV36|MELPH_HUMAN	S	VAVTASEVQQAESEVS(+79.97)DIESR	16	21	Melanophilin OS=Homo sapiens OX=9606 GN=MLPH PE=1 SV=1	Melanophilin	MLPH	65.1	2313.04	1.3	469	489	S16:Phosphorylation (STY):38.16	S484	QAESEVSDIESRI	222.025	1637.5
Q9H832	Q9H832|UBE2Z_HUMAN	S	LHNENAEMDSDSS(+79.97)SSGTETDLHGSLR	13	26	Ubiquitin-conjugating enzyme E2 Z OS=Homo sapiens OX=9606 GN=UBE2Z PE=1 SV=2	Ubiquitin-conjugating enzyme E2 Z	UBE2Z	35	2868.15	-0.5	328	353	S13:Phosphorylation (STY):0.00	S340	EMDSDSSSSGTET	656.24	4844.29
Q9Y4B5	Q9Y4B5|MTCL1_HUMAN	S	S(+79.97)PPERPVPGTPK	1	12	Microtubule cross-linking factor 1 OS=Homo sapiens OX=9606 GN=MTCL1 PE=1 SV=5	Microtubule cross-linking factor 1	MTCL1	45.44	1340.65	-1.7	306	317	S1:Phosphorylation (STY):23.29	S306	EDVRGRSPPERPV	334.034	2468.31
P46821	P46821|MAP1B_HUMAN	S	IAELEEEQSQGSTTNS(+79.97)DWMK	16	20	Microtubule-associated protein 1B OS=Homo sapiens OX=9606 GN=MAP1B PE=1 SV=2	Microtubule-associated protein 1B	MAP1B	76.23	2361.97	0.8	328	347	S16:Phosphorylation (STY):30.83	S343	QGSTTNSDWMKNL	8980.68	66369.9
Q66PJ3	Q66PJ3|AR6P4_HUMAN	S	KAS(+79.97)TAPGAEASPSPC(+57.02)ITER	3	19	ADP-ribosylation factor-like protein 6-interacting protein 4 OS=Homo sapiens OX=9606 GN=ARL6IP4 PE=1 SV=3	ADP-ribosylation factor-like protein 6-interacting protein 4	ARL6IP4	52.59	2008.89	-0.5	45	63	S3:Phosphorylation (STY):0.00;C15:Carbamidomethylation:1000.00	S47	SQGRKASTAPGAE	318.098	2354.33
Q6DD87	Q6DD87|ZN787_HUMAN	S	TFS(+79.97)QSSHLVQHR	3	12	Zinc finger protein 787 OS=Homo sapiens OX=9606 GN=ZNF787 PE=1 SV=4	Zinc finger protein 787	ZNF787	47.47	1505.68	-3.4	102	113	S3:Phosphorylation (STY):14.04	S104	DCGKTFSQSSHLV	274.492	2031.97
Q5UIP0	Q9H2P0|ADNP_HUMAN:Q5UIP0|RIF1_HUMAN	S	SQEDEISS(+79.97)PVNK	8	12	Telomere-associated protein RIF1 OS=Homo sapiens OX=9606 GN=RIF1 PE=1 SV=2	Telomere-associated protein RIF1	RIF1	27.56	1411.59	-2.2	2189	2200	S8:Phosphorylation (STY):0.00	S2196	QEDEISSPVNKVR	536.663	3974.46
P34741	P34741|SDC2_HUMAN	S	DEGS(+79.97)YDLGER	4	10	Syndecan-2 OS=Homo sapiens OX=9606 GN=SDC2 PE=1 SV=2	Syndecan-2	SDC2	44.28	1219.44	0.3	175	184	S4:Phosphorylation (STY):10.11	S178	RKKDEGSYDLGER	48.8698	361.979
Q68EM7	Q68EM7|RHG17_HUMAN	S	S(+79.97)PSPPTQHT(+79.97)GQPPGQPSAPSQLSAPR	1	26	Rho GTPase-activating protein 17 OS=Homo sapiens OX=9606 GN=ARHGAP17 PE=1 SV=1	Rho GTPase-activating protein 17	ARHGAP17	20.13	2766.22	-3	674	699	S1:Phosphorylation (STY):0.00;T9:Phosphorylation (STY):0.00	S674	PKPPTRSPSPPTQ	694.795	5147.17
Q68EM7	Q68EM7|RHG17_HUMAN	T	S(+79.97)PSPPTQHT(+79.97)GQPPGQPSAPSQLSAPR	9	26	Rho GTPase-activating protein 17 OS=Homo sapiens OX=9606 GN=ARHGAP17 PE=1 SV=1	Rho GTPase-activating protein 17	ARHGAP17	20.13	2766.22	-3	674	699	S1:Phosphorylation (STY):0.00;T9:Phosphorylation (STY):0.00	T682	SPPTQHTGQPPGQ	694.795	5147.17
Q8N488	Q8N488|RYBP_HUMAN	S	S(+79.97)ST(+79.97)PKGDMSAVNDESF	1	16	RING1 and YY1-binding protein OS=Homo sapiens OX=9606 GN=RYBP PE=1 SV=2	RING1 and YY1-binding protein	RYBP	48.33	1830.64	0.4	213	228	S1:Phosphorylation (STY):0.00;T3:Phosphorylation (STY):0.00	S213	DKGSSRSSTPKGD	3159.92	23458.1
Q8N488	Q8N488|RYBP_HUMAN	T	S(+79.97)ST(+79.97)PKGDMSAVNDESF	3	16	RING1 and YY1-binding protein OS=Homo sapiens OX=9606 GN=RYBP PE=1 SV=2	RING1 and YY1-binding protein	RYBP	48.33	1830.64	0.4	213	228	S1:Phosphorylation (STY):0.00;T3:Phosphorylation (STY):0.00	T215	GSSRSSTPKGDMS	3159.92	23458.1
Q13247	Q13247|SRSF6_HUMAN	S	S(+79.97)RS(+79.97)QS(+79.97)RS(+79.97)NS(+79.97)PLPVPPSK	1	17	Serine/arginine-rich splicing factor 6 OS=Homo sapiens OX=9606 GN=SRSF6 PE=1 SV=2	Serine/arginine-rich splicing factor 6	SRSF6	36.27	2222.8	0.9	295	311	S1:Phosphorylation (STY):49.37;S3:Phosphorylation (STY):39.02;S5:Phosphorylation (STY):28.74;S7:Phosphorylation (STY):22.83;S9:Phosphorylation (STY):26.08	S295	IKSKSRSRSQSRS	8731.11	65055.3
Q13247	Q13247|SRSF6_HUMAN	S	S(+79.97)RS(+79.97)QS(+79.97)RS(+79.97)NS(+79.97)PLPVPPSK	3	17	Serine/arginine-rich splicing factor 6 OS=Homo sapiens OX=9606 GN=SRSF6 PE=1 SV=2	Serine/arginine-rich splicing factor 6	SRSF6	36.27	2222.8	0.9	295	311	S1:Phosphorylation (STY):49.37;S3:Phosphorylation (STY):39.02;S5:Phosphorylation (STY):28.74;S7:Phosphorylation (STY):22.83;S9:Phosphorylation (STY):26.08	S297	SKSRSRSQSRSNS	8731.11	65055.3
Q13247	Q13247|SRSF6_HUMAN	S	S(+79.97)RS(+79.97)QS(+79.97)RS(+79.97)NS(+79.97)PLPVPPSK	5	17	Serine/arginine-rich splicing factor 6 OS=Homo sapiens OX=9606 GN=SRSF6 PE=1 SV=2	Serine/arginine-rich splicing factor 6	SRSF6	36.27	2222.8	0.9	295	311	S1:Phosphorylation (STY):49.37;S3:Phosphorylation (STY):39.02;S5:Phosphorylation (STY):28.74;S7:Phosphorylation (STY):22.83;S9:Phosphorylation (STY):26.08	S299	SRSRSQSRSNSPL	8731.11	65055.3
Q13247	Q13247|SRSF6_HUMAN	S	S(+79.97)RS(+79.97)QS(+79.97)RS(+79.97)NS(+79.97)PLPVPPSK	7	17	Serine/arginine-rich splicing factor 6 OS=Homo sapiens OX=9606 GN=SRSF6 PE=1 SV=2	Serine/arginine-rich splicing factor 6	SRSF6	36.27	2222.8	0.9	295	311	S1:Phosphorylation (STY):49.37;S3:Phosphorylation (STY):39.02;S5:Phosphorylation (STY):28.74;S7:Phosphorylation (STY):22.83;S9:Phosphorylation (STY):26.08	S301	SRSQSRSNSPLPV	8731.11	65055.3
Q13247	Q13247|SRSF6_HUMAN	S	S(+79.97)RS(+79.97)QS(+79.97)RS(+79.97)NS(+79.97)PLPVPPSK	9	17	Serine/arginine-rich splicing factor 6 OS=Homo sapiens OX=9606 GN=SRSF6 PE=1 SV=2	Serine/arginine-rich splicing factor 6	SRSF6	36.27	2222.8	0.9	295	311	S1:Phosphorylation (STY):49.37;S3:Phosphorylation (STY):39.02;S5:Phosphorylation (STY):28.74;S7:Phosphorylation (STY):22.83;S9:Phosphorylation (STY):26.08	S303	SQSRSNSPLPVPP	8731.11	65055.3
Q9NP79	Q9NP79|VTA1_HUMAN	S	YAGS(+79.97)ALQYEDVSTAVQNLQK	4	20	Vacuolar protein sorting-associated protein VTA1 homolog OS=Homo sapiens OX=9606 GN=VTA1 PE=1 SV=1	Vacuolar protein sorting-associated protein VTA1 homolog	VTA1	54.9	2264.04	-2.9	278	297	S4:Phosphorylation (STY):0.00	S281	YCKYAGSALQYED	69.8994	522.251
Q969T4	Q969T4|UB2E3_HUMAN	T	SDDESPST(+79.97)SSGSSDADQRDPAAPEPEEQEER	8	31	Ubiquitin-conjugating enzyme E2 E3 OS=Homo sapiens OX=9606 GN=UBE2E3 PE=1 SV=1	Ubiquitin-conjugating enzyme E2 E3	UBE2E3	20.94	3384.3	0.2	8	38	T8:Phosphorylation (STY):0.00	T15	DDESPSTSSGSSD	664.522	4965.62
Q14166	Q14166|TTL12_HUMAN	S	S(+79.97)SPGQTPEEGAQALAEFAALHGPALR	1	26	Tubulin--tyrosine ligase-like protein 12 OS=Homo sapiens OX=9606 GN=TTLL12 PE=1 SV=2	Tubulin--tyrosine ligase-like protein 12	TTLL12	70.32	2684.26	2	15	40	S1:Phosphorylation (STY):0.00	S15	RRPAERSSPGQTP	4822.72	36048.5
Q6AI08	Q6AI08|HEAT6_HUMAN	S	KAPAGPSLEETSVSS(+79.97)PK	15	17	HEAT repeat-containing protein 6 OS=Homo sapiens OX=9606 GN=HEATR6 PE=1 SV=1	HEAT repeat-containing protein 6	HEATR6	61.51	1763.83	-1.7	629	645	S15:Phosphorylation (STY):11.06	S643	EETSVSSPKGSSE	808.09	6046.77
Q5VWJ9	Q5VWJ9|SNX30_HUMAN	S	DMPHPLAGSSSEEAVGGDSTPS(+79.97)PDLLMAR	22	29	Sorting nexin-30 OS=Homo sapiens OX=9606 GN=SNX30 PE=1 SV=1	Sorting nexin-30	SNX30	58.02	3003.3	1.2	19	47	S22:Phosphorylation (STY):32.28	S40	GGDSTPSPDLLMA	1102.29	8249.24
P08651	P08651|NFIC_HUMAN	S	S(+79.97)PFNSPSPQDSPR	1	13	Nuclear factor 1 C-type OS=Homo sapiens OX=9606 GN=NFIC PE=1 SV=2	Nuclear factor 1 C-type	NFIC	34.21	1494.61	10.4	333	345	S1:Phosphorylation (STY):13.63	S333	KTEMDKSPFNSPS	519.743	3890.35
P17096	P17096|HMGA1_HUMAN	S	EPS(+79.97)EVPTPK	3	9	High mobility group protein HMG-I/HMG-Y OS=Homo sapiens OX=9606 GN=HMGA1 PE=1 SV=3	High mobility group protein HMG-I/HMG-Y	HMGA1	49.11	1062.46	-2.9	47	55	S3:Phosphorylation (STY):0.00	S49	GSQKEPSEVPTPK	2036.02	15245.5
Q9BY44	Q9BY44|EIF2A_HUMAN	T	APST(+79.97)PLLTVR	4	10	Eukaryotic translation initiation factor 2A OS=Homo sapiens OX=9606 GN=EIF2A PE=1 SV=3	Eukaryotic translation initiation factor 2A	EIF2A	46.81	1133.58	4.5	2	11	T4:Phosphorylation (STY):0.00	T5	__MAPSTPLLTVR	69.3239	520.544
Q6FI81	Q6FI81|CPIN1_HUMAN	S	SS(+79.97)PSVKPAVDPAAAK	2	15	Anamorsin OS=Homo sapiens OX=9606 GN=CIAPIN1 PE=1 SV=2	Anamorsin	CIAPIN1	35.63	1503.73	2.3	182	196	S2:Phosphorylation (STY):0.00	S183	SITKKSSPSVKPA	712.631	5351.77
P51178	P51178|PLCD1_HUMAN	T	KLGGLLPPGGEGGPEAT(+79.97)VVSDEDEAAEMEDEAVR	17	34	1-phosphatidylinositol 4,5-bisphosphate phosphodiesterase delta-1 OS=Homo sapiens OX=9606 GN=PLCD1 PE=1 SV=2	1-phosphatidylinositol 4,5-bisphosphate phosphodiesterase delta-1	PLCD1	35.12	3503.56	2.7	441	474	T17:Phosphorylation (STY):0.00	T457	EGGPEATVVSDED	358.868	2708.13
Q8WUF5	Q8WUF5|IASPP_HUMAN	S	HGGPGPGGPEPELS(+79.97)PITEGSEAR	14	23	RelA-associated inhibitor OS=Homo sapiens OX=9606 GN=PPP1R13L PE=1 SV=4	RelA-associated inhibitor	PPP1R13L	52.01	2307.02	-2.9	554	576	S14:Phosphorylation (STY):26.52	S567	GPEPELSPITEGS	580.951	4384.14
P07910	P07910|HNRPC_HUMAN	S	MES(+79.97)EGGADDSAEEGDLLDDDDNEDR	3	25	Heterogeneous nuclear ribonucleoproteins C1/C2 OS=Homo sapiens OX=9606 GN=HNRNPC PE=1 SV=4	Heterogeneous nuclear ribonucleoproteins C1/C2	HNRNPC	76.68	2777.96	-1.4	251	275	S3:Phosphorylation (STY):29.06	S253	TNVKMESEGGADD	293.571	2216.18
O60763	O60763|USO1_HUMAN	S	DLGHPVEEEDELES(+79.97)GDQEDEDDESEDPGKDLDHI	14	34	General vesicular transport factor p115 OS=Homo sapiens OX=9606 GN=USO1 PE=1 SV=2	General vesicular transport factor p115	USO1	71.23	3915.51	1.6	929	962	S14:Phosphorylation (STY):43.70	S942	EEDELESGDQEDE	22421.1	169306
Q6R327	Q6R327|RICTR_HUMAN	S	SNS(+79.97)VSLVPPGSSHTLPR	3	17	Rapamycin-insensitive companion of mTOR OS=Homo sapiens OX=9606 GN=RICTOR PE=1 SV=1	Rapamycin-insensitive companion of mTOR	RICTOR	43.95	1813.87	2.1	1282	1298	S3:Phosphorylation (STY):0.00	S1284	SLSKSNSVSLVPP	184.87	1397.19
Q9BTE3	Q9BTE3|MCMBP_HUMAN	S	S(+79.97)YEDDDDMDLQPNK	1	14	Mini-chromosome maintenance complex-binding protein OS=Homo sapiens OX=9606 GN=MCMBP PE=1 SV=2	Mini-chromosome maintenance complex-binding protein	MCMBP	68.1	1763.62	0.7	167	180	S1:Phosphorylation (STY):0.00	S167	PSRHKRSYEDDDD	507.631	3841.97
P42166	P42166|LAP2A_HUMAN:P42167|LAP2B_HUMAN	S	GPPDFSS(+79.97)DEEREPT(+79.97)PVLGSGAAAAGR	7	26	Lamina-associated polypeptide 2, isoform alpha OS=Homo sapiens OX=9606 GN=TMPO PE=1 SV=2	Lamina-associated polypeptide 2, isoform alpha	TMPO	38.62	2729.14	-4	61	86	S7:Phosphorylation (STY):17.01;T14:Phosphorylation (STY):14.62	S67	GPPDFSSDEEREP	589.596	4465.15
P42166	P42166|LAP2A_HUMAN:P42167|LAP2B_HUMAN	T	GPPDFSS(+79.97)DEEREPT(+79.97)PVLGSGAAAAGR	14	26	Lamina-associated polypeptide 2, isoform alpha OS=Homo sapiens OX=9606 GN=TMPO PE=1 SV=2	Lamina-associated polypeptide 2, isoform alpha	TMPO	38.62	2729.14	-4	61	86	S7:Phosphorylation (STY):17.01;T14:Phosphorylation (STY):14.62	T74	DEEREPTPVLGSG	589.596	4465.15
P50548	P50548|ERF_HUMAN	S	GSVS(+79.97)DC(+57.02)SDGTSELEEPLGEDPR	4	22	ETS domain-containing transcription factor ERF OS=Homo sapiens OX=9606 GN=ERF PE=1 SV=2	ETS domain-containing transcription factor ERF	ERF	62.64	2414.94	0.1	184	205	S4:Phosphorylation (STY):0.00;C6:Carbamidomethylation:1000.00	S187	LGRGSVSDCSDGT	230.264	1749.3
Q14978	Q14978|NOLC1_HUMAN	S	AS(+79.97)SSDSEDSSEEEEEVQGPPAK	2	22	Nucleolar and coiled-body phosphoprotein 1 OS=Homo sapiens OX=9606 GN=NOLC1 PE=1 SV=2	Nucleolar and coiled-body phosphoprotein 1	NOLC1	70.04	2372.9	0.5	82	103	S2:Phosphorylation (STY):0.00	S83	KAKKKASSSDSED	2681.03	20402.5
O60307	Q96HS1|PGAM5_HUMAN:O60307|MAST3_HUMAN	S	SS(+79.97)ENVLDEEGGR	2	12	Microtubule-associated serine/threonine-protein kinase 3 OS=Homo sapiens OX=9606 GN=MAST3 PE=1 SV=2	Microtubule-associated serine/threonine-protein kinase 3	MAST3	54.47	1370.54	-3.6	134	145	S2:Phosphorylation (STY):0.00	S135	SKHFRSSENVLDE	63.4961	483.47
O75534	O75534|CSDE1_HUMAN	T	T(+79.97)HSVNGITEEADPTIYSGK	1	19	Cold shock domain-containing protein E1 OS=Homo sapiens OX=9606 GN=CSDE1 PE=1 SV=2	Cold shock domain-containing protein E1	CSDE1	45.76	2097.93	-12.2	582	600	T1:Phosphorylation (STY):0.00	T582	AEKVNKTHSVNGI	182.44	1390.24
Q96K76	Q96K76|UBP47_HUMAN	S	ETWDTAEEDS(+79.97)GT(+79.97)DSEYDESGK	10	21	Ubiquitin carboxyl-terminal hydrolase 47 OS=Homo sapiens OX=9606 GN=USP47 PE=1 SV=3	Ubiquitin carboxyl-terminal hydrolase 47	USP47	43.7	2509.82	1.2	1004	1024	S10:Phosphorylation (STY):8.26;T12:Phosphorylation (STY):11.10	S1013	DTAEEDSGTDSEY	125.313	957.74
Q96K76	Q96K76|UBP47_HUMAN	T	ETWDTAEEDS(+79.97)GT(+79.97)DSEYDESGK	12	21	Ubiquitin carboxyl-terminal hydrolase 47 OS=Homo sapiens OX=9606 GN=USP47 PE=1 SV=3	Ubiquitin carboxyl-terminal hydrolase 47	USP47	43.7	2509.82	1.2	1004	1024	S10:Phosphorylation (STY):8.26;T12:Phosphorylation (STY):11.10	T1015	AEEDSGTDSEYDE	125.313	957.74
Q9UQ35	Q9UQ35|SRRM2_HUMAN	S	RSC(+57.02)FESS(+79.97)PDPELK	7	13	Serine/arginine repetitive matrix protein 2 OS=Homo sapiens OX=9606 GN=SRRM2 PE=1 SV=2	Serine/arginine repetitive matrix protein 2	SRRM2	43.14	1630.67	-1.4	870	882	C3:Carbamidomethylation:1000.00;S7:Phosphorylation (STY):8.69	S876	RSCFESSPDPELK	540.955	4137.11
Q6NYC1	Q6NYC1|JMJD6_HUMAN	S	TC(+57.02)S(+79.97)MVGNGDTTSQDDC(+57.02)VSK	3	19	Bifunctional arginine demethylase and lysyl-hydroxylase JMJD6 OS=Homo sapiens OX=9606 GN=JMJD6 PE=1 SV=1	Bifunctional arginine demethylase and lysyl-hydroxylase JMJD6	JMJD6	84.22	2140.77	3.5	379	397	C2:Carbamidomethylation:1000.00;S3:Phosphorylation (STY):8.22;C16:Carbamidomethylation:1000.00	S381	KKRRTCSMVGNGD	265.357	2030.02
Q70E73	Q70E73|RAPH1_HUMAN	S	M(+42.01)(+15.99)EQLS(+79.97)DEEIDHGAEEDS(+79.97)DKEDQDLDK	5	26	Ras-associated and pleckstrin homology domains-containing protein 1 OS=Homo sapiens OX=9606 GN=RAPH1 PE=1 SV=3	Ras-associated and pleckstrin homology domains-containing protein 1	RAPH1	35.25	3237.17	-0.3	1	26		S5	__MEQLSDEEIDH	1779.38	13618.9
Q70E73	Q70E73|RAPH1_HUMAN	S	M(+42.01)(+15.99)EQLS(+79.97)DEEIDHGAEEDS(+79.97)DKEDQDLDK	17	26	Ras-associated and pleckstrin homology domains-containing protein 1 OS=Homo sapiens OX=9606 GN=RAPH1 PE=1 SV=3	Ras-associated and pleckstrin homology domains-containing protein 1	RAPH1	35.25	3237.17	-0.3	1	26		S17	HGAEEDSDKEDQD	1779.38	13618.9
Q70E73	Q70E73|RAPH1_HUMAN	T	TASAGT(+79.97)VSDAEVHSISNSSHSSITSAASSMDSLDIDK	6	37	Ras-associated and pleckstrin homology domains-containing protein 1 OS=Homo sapiens OX=9606 GN=RAPH1 PE=1 SV=3	Ras-associated and pleckstrin homology domains-containing protein 1	RAPH1	30.21	3744.63	4.2	190	226	T6:Phosphorylation (STY):0.00	T195	RTASAGTVSDAEV	280.79	2154.85
Q12888	Q12888|TP53B_HUMAN	T	ET(+79.97)AVPGPLGIEDISPNLSPDDK	2	22	TP53-binding protein 1 OS=Homo sapiens OX=9606 GN=TP53BP1 PE=1 SV=2	TP53-binding protein 1	TP53BP1	21.58	2343.09	3.4	1413	1434	T2:Phosphorylation (STY):0.00	T1414	TTGTRETAVPGPL	2606.7	20006.9
Q5JRA6	Q08050|FOXM1_HUMAN:Q5JRA6|TGO1_HUMAN	S	S(+79.97)GVEKYPTDK	1	10	Transport and Golgi organization protein 1 homolog OS=Homo sapiens OX=9606 GN=MIA3 PE=1 SV=1	Transport and Golgi organization protein 1 homolog	MIA3	19.58	1202.52	6.7	345	354	S1:Phosphorylation (STY):2.87	S345	MKTPAKSGVEKYP	5035.62	38734.7
P27708	P27708|PYR1_HUMAN	T	KWPQGAVPQLPPSAPATSEMTT(+79.97)TPERPR	22	28	CAD protein OS=Homo sapiens OX=9606 GN=CAD PE=1 SV=3	CAD protein	CAD	47.01	3109.51	-1.7	1811	1838	T22:Phosphorylation (STY):0.00	T1832	ATSEMTTTPERPR	513.771	3966.49
Q15751	Q15751|HERC1_HUMAN	T	VST(+79.97)DLPEGQDVYTAAC(+57.02)NSVIHR	3	22	Probable E3 ubiquitin-protein ligase HERC1 OS=Homo sapiens OX=9606 GN=HERC1 PE=1 SV=2	Probable E3 ubiquitin-protein ligase HERC1	HERC1	44.56	2511.11	0.3	1427	1448	T3:Phosphorylation (STY):0.00;C16:Carbamidomethylation:1000.00	T1429	QERRVSTDLPEGQ	226.716	1750.94
A2RRP1	A2RRP1|NBAS_HUMAN	S	AGEEDEGEEDS(+79.97)DS(+79.97)DYEISAK	11	20	NBAS subunit of NRZ tethering complex OS=Homo sapiens OX=9606 GN=NBAS PE=1 SV=2	NBAS subunit of NRZ tethering complex	NBAS	63.4	2333.76	0.1	463	482	S11:Phosphorylation (STY):11.12;S13:Phosphorylation (STY):14.04	S473	DEGEEDSDSDYEI	2576.3	19898.4
A2RRP1	A2RRP1|NBAS_HUMAN	S	AGEEDEGEEDS(+79.97)DS(+79.97)DYEISAK	13	20	NBAS subunit of NRZ tethering complex OS=Homo sapiens OX=9606 GN=NBAS PE=1 SV=2	NBAS subunit of NRZ tethering complex	NBAS	63.4	2333.76	0.1	463	482	S11:Phosphorylation (STY):11.12;S13:Phosphorylation (STY):14.04	S475	GEEDSDSDYEISA	2576.3	19898.4
P53999	P53999|TCP4_HUMAN	S	ELVSSSS(+79.97)SGSDS(+79.97)DSEVDK	7	18	Activated RNA polymerase II transcriptional coactivator p15 OS=Homo sapiens OX=9606 GN=SUB1 PE=1 SV=3	Activated RNA polymerase II transcriptional coactivator p15	SUB1	73.5	1973.7	1.6	6	23	S7:Phosphorylation (STY):14.02;S12:Phosphorylation (STY):22.85	S12	ELVSSSSSGSDSD	4968.03	38414.6
P53999	P53999|TCP4_HUMAN	S	ELVSSSS(+79.97)SGSDS(+79.97)DSEVDK	12	18	Activated RNA polymerase II transcriptional coactivator p15 OS=Homo sapiens OX=9606 GN=SUB1 PE=1 SV=3	Activated RNA polymerase II transcriptional coactivator p15	SUB1	73.5	1973.7	1.6	6	23	S7:Phosphorylation (STY):14.02;S12:Phosphorylation (STY):22.85	S17	SSSGSDSDSEVDK	4968.03	38414.6
B5ME19	B5ME19|EIFCL_HUMAN:Q99613|EIF3C_HUMAN	S	FFTTGS(+79.97)DS(+79.97)ESESSLSGEELVTKPVGGNYGK	6	30	Eukaryotic translation initiation factor 3 subunit C-like protein OS=Homo sapiens OX=9606 GN=EIF3CL PE=1 SV=1	Eukaryotic translation initiation factor 3 subunit C-like protein	EIF3CL	63.77	3268.37	0	4	33	S6:Phosphorylation (STY):5.99;S8:Phosphorylation (STY):0.00	S9	RFFTTGSDSESES	765.95	5928.2
B5ME19	B5ME19|EIFCL_HUMAN:Q99613|EIF3C_HUMAN	S	FFTTGS(+79.97)DS(+79.97)ESESSLSGEELVTKPVGGNYGK	8	30	Eukaryotic translation initiation factor 3 subunit C-like protein OS=Homo sapiens OX=9606 GN=EIF3CL PE=1 SV=1	Eukaryotic translation initiation factor 3 subunit C-like protein	EIF3CL	63.77	3268.37	0	4	33	S6:Phosphorylation (STY):5.99;S8:Phosphorylation (STY):0.00	S11	FTTGSDSESESSL	765.95	5928.2
P17676	P17676|CEBPB_HUMAN	T	AYLGYQAVPSGSSGSLST(+79.97)SSSSSPPGTPSPADAK	18	34	CCAAT/enhancer-binding protein beta OS=Homo sapiens OX=9606 GN=CEBPB PE=1 SV=2	CCAAT/enhancer-binding protein beta	CEBPB	57.94	3277.47	4.6	209	242	T18:Phosphorylation (STY):14.04	T226	SSGSLSTSSSSSP	487.244	3772.55
P62280	P62280|RS11_HUMAN	S	C(+57.02)PFTGNVS(+79.97)IR	8	10	40S ribosomal protein S11 OS=Homo sapiens OX=9606 GN=RPS11 PE=1 SV=3	40S ribosomal protein S11	RPS11	48.73	1229.53	-3.7	60	69	C1:Carbamidomethylation:1000.00;S8:Phosphorylation (STY):12.42	S67	PFTGNVSIRGRIL	65.4469	507.311
Q8WVC0	Q8WVC0|LEO1_HUMAN:Q9NTI5|PDS5B_HUMAN	S	KNAIASDSEADS(+79.97)DTEVPK	12	18	RNA polymerase-associated protein LEO1 OS=Homo sapiens OX=9606 GN=LEO1 PE=1 SV=1	RNA polymerase-associated protein LEO1	LEO1	50.35	1955.84	-2	289	306	S12:Phosphorylation (STY):11.01	S300	SDSEADSDTEVPK	538.3	4176.4
Q04727	Q04727|TLE4_HUMAN	S	YDS(+79.97)DGEKS(+79.97)DDNLVVDVSNEDPSSPR	3	25	Transducin-like enhancer protein 4 OS=Homo sapiens OX=9606 GN=TLE4 PE=1 SV=3	Transducin-like enhancer protein 4	TLE4	30.88	2898.11	0.5	243	267	S3:Phosphorylation (STY):0.41;S8:Phosphorylation (STY):0.00	S245	IAARYDSDGEKSD	64.592	501.196
Q04727	Q04727|TLE4_HUMAN	S	YDS(+79.97)DGEKS(+79.97)DDNLVVDVSNEDPSSPR	8	25	Transducin-like enhancer protein 4 OS=Homo sapiens OX=9606 GN=TLE4 PE=1 SV=3	Transducin-like enhancer protein 4	TLE4	30.88	2898.11	0.5	243	267	S3:Phosphorylation (STY):0.41;S8:Phosphorylation (STY):0.00	S250	DSDGEKSDDNLVV	64.592	501.196
Q15149	Q15149|PLEC_HUMAN	S	S(+79.97)SSVGSSSSY(+79.97)PIS(+79.97)PAVSR	1	18	Plectin OS=Homo sapiens OX=9606 GN=PLEC PE=1 SV=3	Plectin	PLEC	22.34	1993.75	9.9	4384	4401	S1:Phosphorylation (STY):0.00;Y10:Phosphorylation (STY):0.00;S13:Phosphorylation (STY):8.26	S4384	GGFRSRSSSVGSS	755.855	5874.59
Q15149	Q15149|PLEC_HUMAN	Y	S(+79.97)SSVGSSSSY(+79.97)PIS(+79.97)PAVSR	10	18	Plectin OS=Homo sapiens OX=9606 GN=PLEC PE=1 SV=3	Plectin	PLEC	22.34	1993.75	9.9	4384	4401	S1:Phosphorylation (STY):0.00;Y10:Phosphorylation (STY):0.00;S13:Phosphorylation (STY):8.26	Y4393	VGSSSSYPISPAV	755.855	5874.59
Q15149	Q15149|PLEC_HUMAN	S	S(+79.97)SSVGSSSSY(+79.97)PIS(+79.97)PAVSR	13	18	Plectin OS=Homo sapiens OX=9606 GN=PLEC PE=1 SV=3	Plectin	PLEC	22.34	1993.75	9.9	4384	4401	S1:Phosphorylation (STY):0.00;Y10:Phosphorylation (STY):0.00;S13:Phosphorylation (STY):8.26	S4396	SSSYPISPAVSRT	755.855	5874.59
P29374	P29374|ARI4A_HUMAN	T	NGT(+79.97)GQSSDSEDLPVLDNSSK	3	20	AT-rich interactive domain-containing protein 4A OS=Homo sapiens OX=9606 GN=ARID4A PE=1 SV=3	AT-rich interactive domain-containing protein 4A	ARID4A	47.74	2128.88	4.4	1103	1122	T3:Phosphorylation (STY):0.00	T1105	KNEKNGTGQSSDS	501.713	3899.87
Q9Y3R5	Q9Y3R5|DOP2_HUMAN	T	VQMPPSYLDTEST(+79.97)SGTSSPVKGENGK	13	26	Protein dopey-2 OS=Homo sapiens OX=9606 GN=DOP1B PE=1 SV=5	Protein dopey-2	DOP1B	27.03	2775.23	-1.5	539	564	T13:Phosphorylation (STY):0.00	T551	YLDTESTSGTSSP	50.9198	395.944
P98175	P98175|RBM10_HUMAN	Y	HDY(+79.97)DDSSEEQSAEDSYEASPGSETQR	3	26	RNA-binding protein 10 OS=Homo sapiens OX=9606 GN=RBM10 PE=1 SV=3	RNA-binding protein 10	RBM10	65.36	2998.09	0	55	80	Y3:Phosphorylation (STY):0.00	Y57	QEGKHDYDDSSEE	665.296	5180.64
P46821	P46821|MAP1B_HUMAN	S	AS(+79.97)VS(+79.97)PMDEPVPDSES(+79.97)PIEK	2	19	Microtubule-associated protein 1B OS=Homo sapiens OX=9606 GN=MAP1B PE=1 SV=2	Microtubule-associated protein 1B	MAP1B	59.24	2252.82	1.4	1375	1393	S2:Phosphorylation (STY):67.38;S4:Phosphorylation (STY):76.18;S15:Phosphorylation (STY):14.04	S1376	DENERASVSPMDE	1625.73	12671.2
P46821	P46821|MAP1B_HUMAN	S	AS(+79.97)VS(+79.97)PMDEPVPDSES(+79.97)PIEK	4	19	Microtubule-associated protein 1B OS=Homo sapiens OX=9606 GN=MAP1B PE=1 SV=2	Microtubule-associated protein 1B	MAP1B	59.24	2252.82	1.4	1375	1393	S2:Phosphorylation (STY):67.38;S4:Phosphorylation (STY):76.18;S15:Phosphorylation (STY):14.04	S1378	NERASVSPMDEPV	1625.73	12671.2
P46821	P46821|MAP1B_HUMAN	S	AS(+79.97)VS(+79.97)PMDEPVPDSES(+79.97)PIEK	15	19	Microtubule-associated protein 1B OS=Homo sapiens OX=9606 GN=MAP1B PE=1 SV=2	Microtubule-associated protein 1B	MAP1B	59.24	2252.82	1.4	1375	1393	S2:Phosphorylation (STY):67.38;S4:Phosphorylation (STY):76.18;S15:Phosphorylation (STY):14.04	S1389	PVPDSESPIEKVL	1625.73	12671.2
Q9UPN7	Q9UPN7|PP6R1_HUMAN	S	NMVDLVNTHHLHS(+79.97)S(+79.97)S(+79.97)DDEDDR	13	21	Serine/threonine-protein phosphatase 6 regulatory subunit 1 OS=Homo sapiens OX=9606 GN=PPP6R1 PE=1 SV=5	Serine/threonine-protein phosphatase 6 regulatory subunit 1	PPP6R1	56.14	2674.94	-1.1	517	537	S13:Phosphorylation (STY):9.30;S14:Phosphorylation (STY):7.97;S15:Phosphorylation (STY):6.90	S529	NTHHLHSSSDDED	523.993	4088.35
Q9UPN7	Q9UPN7|PP6R1_HUMAN	S	NMVDLVNTHHLHS(+79.97)S(+79.97)S(+79.97)DDEDDR	14	21	Serine/threonine-protein phosphatase 6 regulatory subunit 1 OS=Homo sapiens OX=9606 GN=PPP6R1 PE=1 SV=5	Serine/threonine-protein phosphatase 6 regulatory subunit 1	PPP6R1	56.14	2674.94	-1.1	517	537	S13:Phosphorylation (STY):9.30;S14:Phosphorylation (STY):7.97;S15:Phosphorylation (STY):6.90	S530	THHLHSSSDDEDD	523.993	4088.35
Q9UPN7	Q9UPN7|PP6R1_HUMAN	S	NMVDLVNTHHLHS(+79.97)S(+79.97)S(+79.97)DDEDDR	15	21	Serine/threonine-protein phosphatase 6 regulatory subunit 1 OS=Homo sapiens OX=9606 GN=PPP6R1 PE=1 SV=5	Serine/threonine-protein phosphatase 6 regulatory subunit 1	PPP6R1	56.14	2674.94	-1.1	517	537	S13:Phosphorylation (STY):9.30;S14:Phosphorylation (STY):7.97;S15:Phosphorylation (STY):6.90	S531	HHLHSSSDDEDDR	523.993	4088.35
Q14669	Q14669|TRIPC_HUMAN	S	VREDDEDSDDDGSDEEIDES(+79.97)LAAQFLNSGNVR	20	32	E3 ubiquitin-protein ligase TRIP12 OS=Homo sapiens OX=9606 GN=TRIP12 PE=1 SV=1	E3 ubiquitin-protein ligase TRIP12	TRIP12	58.82	3620.45	-0.5	1310	1341	S20:Phosphorylation (STY):0.00	S1329	DEEIDESLAAQFL	565.479	4415.5
Q9UJV9	Q9UJV9|DDX41_HUMAN	S	TDEVPAGGS(+79.97)RS(+79.97)EAEDEDDEDYVPYVPLR	9	28	Probable ATP-dependent RNA helicase DDX41 OS=Homo sapiens OX=9606 GN=DDX41 PE=1 SV=2	Probable ATP-dependent RNA helicase DDX41	DDX41	55.88	3269.3	3.5	13	40	S9:Phosphorylation (STY):0.47;S11:Phosphorylation (STY):0.71	S21	EVPAGGSRSEAED	431.042	3375.73
Q9UJV9	Q9UJV9|DDX41_HUMAN	S	TDEVPAGGS(+79.97)RS(+79.97)EAEDEDDEDYVPYVPLR	11	28	Probable ATP-dependent RNA helicase DDX41 OS=Homo sapiens OX=9606 GN=DDX41 PE=1 SV=2	Probable ATP-dependent RNA helicase DDX41	DDX41	55.88	3269.3	3.5	13	40	S9:Phosphorylation (STY):0.47;S11:Phosphorylation (STY):0.71	S23	PAGGSRSEAEDED	431.042	3375.73
Q7Z3C6	Q7Z3C6|ATG9A_HUMAN	S	S(+79.97)FS(+79.97)PLQPGQAPTGR	1	14	Autophagy-related protein 9A OS=Homo sapiens OX=9606 GN=ATG9A PE=1 SV=3	Autophagy-related protein 9A	ATG9A	47.85	1601.66	4.4	654	667	S1:Phosphorylation (STY):56.41;S3:Phosphorylation (STY):61.14	S654	VASALRSFSPLQP	141.836	1111.77
Q7Z3C6	Q7Z3C6|ATG9A_HUMAN	S	S(+79.97)FS(+79.97)PLQPGQAPTGR	3	14	Autophagy-related protein 9A OS=Homo sapiens OX=9606 GN=ATG9A PE=1 SV=3	Autophagy-related protein 9A	ATG9A	47.85	1601.66	4.4	654	667	S1:Phosphorylation (STY):56.41;S3:Phosphorylation (STY):61.14	S656	SALRSFSPLQPGQ	141.836	1111.77
Q9NVE7	Q9NVE7|PANK4_HUMAN	S	GAEQDNPNQYSWGENYAGSSGLMSAS(+79.97)PELGPAQR	26	34	4'-phosphopantetheine phosphatase OS=Homo sapiens OX=9606 GN=PANK4 PE=1 SV=1	4'-phosphopantetheine phosphatase	PANK4	78.11	3647.53	6.1	368	401	S26:Phosphorylation (STY):20.41	S393	SGLMSASPELGPA	1838.81	14416.6
O75400	O75400|PR40A_HUMAN	T	DSGNWDT(+79.97)SGS(+79.97)ELS(+79.97)EGELEKR	7	20	Pre-mRNA-processing factor 40 homolog A OS=Homo sapiens OX=9606 GN=PRPF40A PE=1 SV=2	Pre-mRNA-processing factor 40 homolog A	PRPF40A	43.95	2434.86	-1.1	926	945	T7:Phosphorylation (STY):0.00;S10:Phosphorylation (STY):0.00;S13:Phosphorylation (STY):23.57	T932	DSGNWDTSGSELS	4421.64	34676.5
O75400	O75400|PR40A_HUMAN	S	DSGNWDT(+79.97)SGS(+79.97)ELS(+79.97)EGELEKR	10	20	Pre-mRNA-processing factor 40 homolog A OS=Homo sapiens OX=9606 GN=PRPF40A PE=1 SV=2	Pre-mRNA-processing factor 40 homolog A	PRPF40A	43.95	2434.86	-1.1	926	945	T7:Phosphorylation (STY):0.00;S10:Phosphorylation (STY):0.00;S13:Phosphorylation (STY):23.57	S935	NWDTSGSELSEGE	4421.64	34676.5
O75400	O75400|PR40A_HUMAN	S	DSGNWDT(+79.97)SGS(+79.97)ELS(+79.97)EGELEKR	13	20	Pre-mRNA-processing factor 40 homolog A OS=Homo sapiens OX=9606 GN=PRPF40A PE=1 SV=2	Pre-mRNA-processing factor 40 homolog A	PRPF40A	43.95	2434.86	-1.1	926	945	T7:Phosphorylation (STY):0.00;S10:Phosphorylation (STY):0.00;S13:Phosphorylation (STY):23.57	S938	TSGSELSEGELEK	4421.64	34676.5
O95373	O95373|IPO7_HUMAN	S	ETAPGDIS(+79.97)PYTIPEEDR	8	17	Importin-7 OS=Homo sapiens OX=9606 GN=IPO7 PE=1 SV=1	Importin-7	IPO7	34.54	1968.84	4.6	72	88	S8:Phosphorylation (STY):0.00	S79	TAPGDISPYTIPE	81.1937	637.161
Q5T4S7	Q5T4S7|UBR4_HUMAN	T	GIT(+79.97)QNALDYMKK	3	12	E3 ubiquitin-protein ligase UBR4 OS=Homo sapiens OX=9606 GN=UBR4 PE=1 SV=1	E3 ubiquitin-protein ligase UBR4	UBR4	22.78	1460.67	1.2	4686	4697	T3:Phosphorylation (STY):22.09	T4688	ILQKGITQNALDY	3679.03	28886.9
P18583	P18583|SON_HUMAN	S	SFS(+79.97)IS(+79.97)PVR	3	8	Protein SON OS=Homo sapiens OX=9606 GN=SON PE=1 SV=4	Protein SON	SON	40.97	1051.41	-2.1	2009	2016	S3:Phosphorylation (STY):39.76;S5:Phosphorylation (STY):58.99	S2011	VRRRSFSISPVRL	254.71	2001.5
P18583	P18583|SON_HUMAN	S	SFS(+79.97)IS(+79.97)PVR	5	8	Protein SON OS=Homo sapiens OX=9606 GN=SON PE=1 SV=4	Protein SON	SON	40.97	1051.41	-2.1	2009	2016	S3:Phosphorylation (STY):39.76;S5:Phosphorylation (STY):58.99	S2013	RRSFSISPVRLRR	254.71	2001.5
Q8TF30	Q8TF30|WHAMM_HUMAN	S	VSADSEEDS(+79.97)DEQDPGQWDG	9	19	WASP homolog-associated protein with actin, membranes and microtubules OS=Homo sapiens OX=9606 GN=WHAMM PE=1 SV=2	WASP homolog-associated protein with actin, membranes and microtubules	WHAMM	61.2	2144.73	-6.2	791	809	S9:Phosphorylation (STY):33.89	S799	ADSEEDSDEQDPG	68.1096	535.425
Q9H4L7	Q9H4L7|SMRCD_HUMAN	S	IEEAPEATPQPSQPGPSS(+79.97)PISLS(+79.97)AEEENAEGEVSR	18	35	SWI/SNF-related matrix-associated actin-dependent regulator of chromatin subfamily A containing DEAD/H box 1 OS=Homo sapiens OX=9606 GN=SMARCAD1 PE=1 SV=2	SWI/SNF-related matrix-associated actin-dependent regulator of chromatin subfamily A containing DEAD/H box 1	SMARCAD1	89.43	3778.61	3.6	17	51	S18:Phosphorylation (STY):30.46;S23:Phosphorylation (STY):9.40	S34	SQPGPSSPISLSA	2124.11	16728.3
Q9H4L7	Q9H4L7|SMRCD_HUMAN	S	IEEAPEATPQPSQPGPSS(+79.97)PISLS(+79.97)AEEENAEGEVSR	23	35	SWI/SNF-related matrix-associated actin-dependent regulator of chromatin subfamily A containing DEAD/H box 1 OS=Homo sapiens OX=9606 GN=SMARCAD1 PE=1 SV=2	SWI/SNF-related matrix-associated actin-dependent regulator of chromatin subfamily A containing DEAD/H box 1	SMARCAD1	89.43	3778.61	3.6	17	51	S18:Phosphorylation (STY):30.46;S23:Phosphorylation (STY):9.40	S39	SSPISLSAEEENA	2124.11	16728.3
Q99856	Q99856|ARI3A_HUMAN	S	AAAAGLGHPAS(+79.97)PGGS(+79.97)EDGPPGSEEEDAAR	11	29	AT-rich interactive domain-containing protein 3A OS=Homo sapiens OX=9606 GN=ARID3A PE=1 SV=2	AT-rich interactive domain-containing protein 3A	ARID3A	72.78	2819.11	4.3	67	95	S11:Phosphorylation (STY):67.73;S15:Phosphorylation (STY):61.82	S77	GLGHPASPGGSED	284.272	2239.27
Q99856	Q99856|ARI3A_HUMAN	S	AAAAGLGHPAS(+79.97)PGGS(+79.97)EDGPPGSEEEDAAR	15	29	AT-rich interactive domain-containing protein 3A OS=Homo sapiens OX=9606 GN=ARID3A PE=1 SV=2	AT-rich interactive domain-containing protein 3A	ARID3A	72.78	2819.11	4.3	67	95	S11:Phosphorylation (STY):67.73;S15:Phosphorylation (STY):61.82	S81	PASPGGSEDGPPG	284.272	2239.27
Q9Y2W1	Q9Y2W1|TR150_HUMAN	T	FSGEEGEIEDDESGT(+79.97)ENREEK	15	21	Thyroid hormone receptor-associated protein 3 OS=Homo sapiens OX=9606 GN=THRAP3 PE=1 SV=2	Thyroid hormone receptor-associated protein 3	THRAP3	44.91	2464.94	0.1	927	947	T15:Phosphorylation (STY):0.00	T941	EDDESGTENREEK	376.104	2962.91
P11142	P11142|HSP7C_HUMAN	S	TVTNAVVTVPAYFNDS(+79.97)QR	16	18	Heat shock cognate 71 kDa protein OS=Homo sapiens OX=9606 GN=HSPA8 PE=1 SV=1	Heat shock cognate 71 kDa protein	HSPA8	55.27	2060.96	2.8	138	155	S16:Phosphorylation (STY):2.44	S153	PAYFNDSQRQATK	119.1	941.533
O14646	O14646|CHD1_HUMAN	Y	RY(+79.97)SGS(+79.97)DS(+79.97)DSISEGK	2	14	Chromodomain-helicase-DNA-binding protein 1 OS=Homo sapiens OX=9606 GN=CHD1 PE=1 SV=2	Chromodomain-helicase-DNA-binding protein 1	CHD1	24.34	1726.55	0.2	1094	1107	Y2:Phosphorylation (STY):0.00;S5:Phosphorylation (STY):11.12;S7:Phosphorylation (STY):5.47	Y1095	RSRSRRYSGSDSD	223.987	1772.64
O14646	O14646|CHD1_HUMAN	S	RY(+79.97)SGS(+79.97)DS(+79.97)DSISEGK	5	14	Chromodomain-helicase-DNA-binding protein 1 OS=Homo sapiens OX=9606 GN=CHD1 PE=1 SV=2	Chromodomain-helicase-DNA-binding protein 1	CHD1	24.34	1726.55	0.2	1094	1107	Y2:Phosphorylation (STY):0.00;S5:Phosphorylation (STY):11.12;S7:Phosphorylation (STY):5.47	S1098	SRRYSGSDSDSIS	223.987	1772.64
O14646	O14646|CHD1_HUMAN	S	RY(+79.97)SGS(+79.97)DS(+79.97)DSISEGK	7	14	Chromodomain-helicase-DNA-binding protein 1 OS=Homo sapiens OX=9606 GN=CHD1 PE=1 SV=2	Chromodomain-helicase-DNA-binding protein 1	CHD1	24.34	1726.55	0.2	1094	1107	Y2:Phosphorylation (STY):0.00;S5:Phosphorylation (STY):11.12;S7:Phosphorylation (STY):5.47	S1100	RYSGSDSDSISEG	223.987	1772.64
Q13085	Q13085|ACACA_HUMAN	T	IFDEVMGC(+57.02)FSDSPPQSPT(+79.97)FPEAGHTSLYDEDK	18	32	Acetyl-CoA carboxylase 1 OS=Homo sapiens OX=9606 GN=ACACA PE=1 SV=2	Acetyl-CoA carboxylase 1	ACACA	40.3	3682.52	8.2	1248	1279	C8:Carbamidomethylation:1000.00;T18:Phosphorylation (STY):8.28	T1265	SPPQSPTFPEAGH	725.85	5750.19
Q04724	Q04724|TLE1_HUMAN	S	DSSHYDSDGDKS(+79.97)DDNLVVDVSNEDPS(+79.97)SPR	12	29	Transducin-like enhancer protein 1 OS=Homo sapiens OX=9606 GN=TLE1 PE=1 SV=2	Transducin-like enhancer protein 1	TLE1	41.48	3310.25	0.9	233	261	S12:Phosphorylation (STY):0.00;S26:Phosphorylation (STY):0.00	S244	DSDGDKSDDNLVV	1697.3	13454.4
Q04724	Q04724|TLE1_HUMAN	S	DSSHYDSDGDKS(+79.97)DDNLVVDVSNEDPS(+79.97)SPR	26	29	Transducin-like enhancer protein 1 OS=Homo sapiens OX=9606 GN=TLE1 PE=1 SV=2	Transducin-like enhancer protein 1	TLE1	41.48	3310.25	0.9	233	261	S12:Phosphorylation (STY):0.00;S26:Phosphorylation (STY):0.00	S258	VSNEDPSSPRASP	1697.3	13454.4
Q09666	Q09666|AHNK_HUMAN	S	ADLDVS(+79.97)GPKVDVDVPDVNIEGPDAK	6	25	Neuroblast differentiation-associated protein AHNAK OS=Homo sapiens OX=9606 GN=AHNAK PE=1 SV=2	Neuroblast differentiation-associated protein AHNAK	AHNAK	51.05	2643.23	-8.1	3177	3201		S3182	KADLDVSGPKVDV	54.811	434.484
Q96BK5	Q96BK5|PINX1_HUMAN	T	KTPEGDASPSTPEENET(+79.97)TTTSAFTIQEYFAK	17	31	PIN2/TERF1-interacting telomerase inhibitor 1 OS=Homo sapiens OX=9606 GN=PINX1 PE=1 SV=2	PIN2/TERF1-interacting telomerase inhibitor 1	PINX1	39.29	3456.51	-3.7	154	184	T17:Phosphorylation (STY):9.45	T170	TPEENETTTTSAF	507.109	4020.23
Q13547	Q13547|HDAC1_HUMAN:Q92769|HDAC2_HUMAN	S	IAC(+57.02)EEEFS(+79.97)DSEEEGEGGRK	8	19	Histone deacetylase 1 OS=Homo sapiens OX=9606 GN=HDAC1 PE=1 SV=1	Histone deacetylase 1	HDAC1	67.3	2236.85	-2.1	414	432	C3:Carbamidomethylation:1000.00;S8:Phosphorylation (STY):9.16	S421	ACEEEFSDSEEEG	10452.5	82882.3
Q92560	Q92560|BAP1_HUMAN	S	S(+79.97)QESQLPEESK	1	11	Ubiquitin carboxyl-terminal hydrolase BAP1 OS=Homo sapiens OX=9606 GN=BAP1 PE=1 SV=2	Ubiquitin carboxyl-terminal hydrolase BAP1	BAP1	51.65	1340.55	-7.2	276	286	S1:Phosphorylation (STY):28.36	S276	LIQTHKSQESQLP	340.57	2711.98
Q8IY17	Q8IY17|PLPL6_HUMAN	S	IEPPTSYVS(+79.97)DGC(+57.02)ADGEES(+79.97)DC(+57.02)LTEYEEDAGPDC(+57.02)SR	9	34	Patatin-like phospholipase domain-containing protein 6 OS=Homo sapiens OX=9606 GN=PNPLA6 PE=1 SV=3	Patatin-like phospholipase domain-containing protein 6	PNPLA6	67.07	3969.41	2.8	1301	1334	S9:Phosphorylation (STY):20.41;C12:Carbamidomethylation:1000.00;S18:Phosphorylation (STY):6.65;C20:Carbamidomethylation:1000.00;C32:Carbamidomethylation:1000.00	S1309	PPTSYVSDGCADG	766.801	6119.01
Q8IY17	Q8IY17|PLPL6_HUMAN	S	IEPPTSYVS(+79.97)DGC(+57.02)ADGEES(+79.97)DC(+57.02)LTEYEEDAGPDC(+57.02)SR	18	34	Patatin-like phospholipase domain-containing protein 6 OS=Homo sapiens OX=9606 GN=PNPLA6 PE=1 SV=3	Patatin-like phospholipase domain-containing protein 6	PNPLA6	67.07	3969.41	2.8	1301	1334	S9:Phosphorylation (STY):20.41;C12:Carbamidomethylation:1000.00;S18:Phosphorylation (STY):6.65;C20:Carbamidomethylation:1000.00;C32:Carbamidomethylation:1000.00	S1318	CADGEESDCLTEY	766.801	6119.01
Q14315	Q14315|FLNC_HUMAN	S	S(+79.97)PFVVNVAPPLDLSK	1	15	Filamin-C OS=Homo sapiens OX=9606 GN=FLNC PE=1 SV=3	Filamin-C	FLNC	58.43	1661.84	-1.4	954	968	S1:Phosphorylation (STY):60.73	S954	GDPVPKSPFVVNV	69.5283	555.251
P37275	P37275|ZEB1_HUMAN	S	S(+79.97)STPSPSPLNLSSSR	1	15	Zinc finger E-box-binding homeobox 1 OS=Homo sapiens OX=9606 GN=ZEB1 PE=1 SV=2	Zinc finger E-box-binding homeobox 1	ZEB1	31.64	1595.72	-3.9	700	714	S1:Phosphorylation (STY):0.00	S700	TTNGSRSSTPSPS	711.996	5704.89
Q9H3Q1	Q9H3Q1|BORG4_HUMAN	S	NGAAGPHS(+79.97)PDPLLDEQAFGDLTDLPVVPK	8	29	Cdc42 effector protein 4 OS=Homo sapiens OX=9606 GN=CDC42EP4 PE=1 SV=1	Cdc42 effector protein 4	CDC42EP4	59.98	3049.44	11.7	167	195	S8:Phosphorylation (STY):95.14	S174	GAAGPHSPDPLLD	779.908	6252.98
Q8WTT2	Q8WTT2|NOC3L_HUMAN	S	DLS(+79.97)SSEPVHAK	3	11	Nucleolar complex protein 3 homolog OS=Homo sapiens OX=9606 GN=NOC3L PE=1 SV=1	Nucleolar complex protein 3 homolog	NOC3L	48.26	1248.54	-1	113	123	S3:Phosphorylation (STY):8.69	S115	FLTRDLSSSEPVH	93.289	750.844
Q96BY6	Q96BY6|DOC10_HUMAN	T	ST(+79.97)ELTDLGLDSLDNSVTC(+57.02)EC(+57.02)TPEETDSSENNLHADFAK	2	38	Dedicator of cytokinesis protein 10 OS=Homo sapiens OX=9606 GN=DOCK10 PE=1 SV=3	Dedicator of cytokinesis protein 10	DOCK10	68.44	4293.77	1.7	302	339	T2:Phosphorylation (STY):0.00;C18:Carbamidomethylation:1000.00;C20:Carbamidomethylation:1000.00	T303	LQGRRSTELTDLG	2556.85	20636.3
Q05209	Q05209|PTN12_HUMAN	T	TVSLT(+79.97)PS(+79.97)PTTQVETPDLVDHDNT(+79.97)SPLFR	5	28	Tyrosine-protein phosphatase non-receptor type 12 OS=Homo sapiens OX=9606 GN=PTPN12 PE=1 SV=3	Tyrosine-protein phosphatase non-receptor type 12	PTPN12	19.98	3306.41	0.8	565	592	T5:Phosphorylation (STY):3.56;S7:Phosphorylation (STY):14.04;T23:Phosphorylation (STY):0.00	T569	RKTVSLTPSPTTQ	422.292	3408.51
Q05209	Q05209|PTN12_HUMAN	S	TVSLT(+79.97)PS(+79.97)PTTQVETPDLVDHDNT(+79.97)SPLFR	7	28	Tyrosine-protein phosphatase non-receptor type 12 OS=Homo sapiens OX=9606 GN=PTPN12 PE=1 SV=3	Tyrosine-protein phosphatase non-receptor type 12	PTPN12	19.98	3306.41	0.8	565	592	T5:Phosphorylation (STY):3.56;S7:Phosphorylation (STY):14.04;T23:Phosphorylation (STY):0.00	S571	TVSLTPSPTTQVE	422.292	3408.51
Q05209	Q05209|PTN12_HUMAN	T	TVSLT(+79.97)PS(+79.97)PTTQVETPDLVDHDNT(+79.97)SPLFR	23	28	Tyrosine-protein phosphatase non-receptor type 12 OS=Homo sapiens OX=9606 GN=PTPN12 PE=1 SV=3	Tyrosine-protein phosphatase non-receptor type 12	PTPN12	19.98	3306.41	0.8	565	592	T5:Phosphorylation (STY):3.56;S7:Phosphorylation (STY):14.04;T23:Phosphorylation (STY):0.00	T587	LVDHDNTSPLFRT	422.292	3408.51
Q16630	Q16630|CPSF6_HUMAN	T	EMDTART(+79.97)PLSEAEFEEIMNR	7	20	Cleavage and polyadenylation specificity factor subunit 6 OS=Homo sapiens OX=9606 GN=CPSF6 PE=1 SV=2	Cleavage and polyadenylation specificity factor subunit 6	CPSF6	62.61	2448.03	-2	401	420	T7:Phosphorylation (STY):5.77	T407	EMDTARTPLSEAE	559.365	4518.49
P31321	P31321|KAP1_HUMAN	S	S(+79.97)NSQSDSHDEEVS(+79.97)PTPPNPVVK	1	22	cAMP-dependent protein kinase type I-beta regulatory subunit OS=Homo sapiens OX=9606 GN=PRKAR1B PE=1 SV=4	cAMP-dependent protein kinase type I-beta regulatory subunit	PRKAR1B	48.29	2509	-4.2	71	92	S1:Phosphorylation (STY):0.00;S13:Phosphorylation (STY):7.40	S71	ILARQKSNSQSDS	5646.89	45644
P31321	P31321|KAP1_HUMAN	S	S(+79.97)NSQSDSHDEEVS(+79.97)PTPPNPVVK	13	22	cAMP-dependent protein kinase type I-beta regulatory subunit OS=Homo sapiens OX=9606 GN=PRKAR1B PE=1 SV=4	cAMP-dependent protein kinase type I-beta regulatory subunit	PRKAR1B	48.29	2509	-4.2	71	92	S1:Phosphorylation (STY):0.00;S13:Phosphorylation (STY):7.40	S83	SHDEEVSPTPPNP	5646.89	45644
Q9UNF0	Q9UNF0|PACN2_HUMAN	S	TQSYPTDWSDDESNNPFSSTDANGDS(+79.97)NPFDDDATSGTEVR	26	40	Protein kinase C and casein kinase substrate in neurons protein 2 OS=Homo sapiens OX=9606 GN=PACSIN2 PE=1 SV=2	Protein kinase C and casein kinase substrate in neurons protein 2	PACSIN2	55.11	4420.69	-2.1	391	430	S26:Phosphorylation (STY):0.00	S416	TDANGDSNPFDDD	56.3385	455.48
Q92974	Q92974|ARHG2_HUMAN	S	S(+79.97)LPAGDALYLSFNPPQPSR	1	19	Rho guanine nucleotide exchange factor 2 OS=Homo sapiens OX=9606 GN=ARHGEF2 PE=1 SV=4	Rho guanine nucleotide exchange factor 2	ARHGEF2	64.28	2108.99	0.6	886	904	S1:Phosphorylation (STY):53.45	S886	VDPRRRSLPAGDA	2635.18	21361.4
Q8WYQ5	Q8WYQ5|DGCR8_HUMAN	Y	Y(+79.97)GGDSDHPS(+79.97)DGETSVQPMMTK	1	21	Microprocessor complex subunit DGCR8 OS=Homo sapiens OX=9606 GN=DGCR8 PE=1 SV=1	Microprocessor complex subunit DGCR8	DGCR8	31.03	2397.85	2.1	267	287	Y1:Phosphorylation (STY):0.00;S9:Phosphorylation (STY):5.55	Y267	RRTEEKYGGDSDH	664.885	5390.74
Q8WYQ5	Q8WYQ5|DGCR8_HUMAN	S	Y(+79.97)GGDSDHPS(+79.97)DGETSVQPMMTK	9	21	Microprocessor complex subunit DGCR8 OS=Homo sapiens OX=9606 GN=DGCR8 PE=1 SV=1	Microprocessor complex subunit DGCR8	DGCR8	31.03	2397.85	2.1	267	287	Y1:Phosphorylation (STY):0.00;S9:Phosphorylation (STY):5.55	S275	GDSDHPSDGETSV	664.885	5390.74
P35269	P35269|T2FA_HUMAN	S	DSSEESDS(+79.97)SEESDIDSEASSALFM(+15.99)AK	8	26	General transcription factor IIF subunit 1 OS=Homo sapiens OX=9606 GN=GTF2F1 PE=1 SV=2	General transcription factor IIF subunit 1	GTF2F1	44.76	2848.06	0	340	365	S8:Phosphorylation (STY):0.00;M24:Oxidation (M):1000.00	S347	SSEESDSSEESDI	41.3389	335.38
P46821	P46821|MAP1B_HUMAN	S	DSISAVSSEKVS(+79.97)PS(+79.97)KSPSLSPSPPS(+79.97)PLEK	12	29	Microtubule-associated protein 1B OS=Homo sapiens OX=9606 GN=MAP1B PE=1 SV=2	Microtubule-associated protein 1B	MAP1B	56.15	3163.4	-0.9	1241	1269	S12:Phosphorylation (STY):3.56;S14:Phosphorylation (STY):0.00;S25:Phosphorylation (STY):28.36	S1252	VSSEKVSPSKSPS	701.448	5698.21
P46821	P46821|MAP1B_HUMAN	S	DSISAVSSEKVS(+79.97)PS(+79.97)KSPSLSPSPPS(+79.97)PLEK	14	29	Microtubule-associated protein 1B OS=Homo sapiens OX=9606 GN=MAP1B PE=1 SV=2	Microtubule-associated protein 1B	MAP1B	56.15	3163.4	-0.9	1241	1269	S12:Phosphorylation (STY):3.56;S14:Phosphorylation (STY):0.00;S25:Phosphorylation (STY):28.36	S1254	SEKVSPSKSPSLS	701.448	5698.21
P46821	P46821|MAP1B_HUMAN	S	DSISAVSSEKVS(+79.97)PS(+79.97)KSPSLSPSPPS(+79.97)PLEK	25	29	Microtubule-associated protein 1B OS=Homo sapiens OX=9606 GN=MAP1B PE=1 SV=2	Microtubule-associated protein 1B	MAP1B	56.15	3163.4	-0.9	1241	1269	S12:Phosphorylation (STY):3.56;S14:Phosphorylation (STY):0.00;S25:Phosphorylation (STY):28.36	S1265	LSPSPPSPLEKTP	701.448	5698.21
P17812	P17812|PYRG1_HUMAN	S	S(+79.97)GSS(+79.97)S(+79.97)PDSEITELK	1	14	CTP synthase 1 OS=Homo sapiens OX=9606 GN=CTPS1 PE=1 SV=2	CTP synthase 1	CTPS1	76.25	1675.57	-1.9	571	584	S1:Phosphorylation (STY):0.00;S4:Phosphorylation (STY):20.92;S5:Phosphorylation (STY):22.34	S571	DTYSDRSGSSSPD	1746.27	14204
P17812	P17812|PYRG1_HUMAN	S	S(+79.97)GSS(+79.97)S(+79.97)PDSEITELK	4	14	CTP synthase 1 OS=Homo sapiens OX=9606 GN=CTPS1 PE=1 SV=2	CTP synthase 1	CTPS1	76.25	1675.57	-1.9	571	584	S1:Phosphorylation (STY):0.00;S4:Phosphorylation (STY):20.92;S5:Phosphorylation (STY):22.34	S574	SDRSGSSSPDSEI	1746.27	14204
P17812	P17812|PYRG1_HUMAN	S	S(+79.97)GSS(+79.97)S(+79.97)PDSEITELK	5	14	CTP synthase 1 OS=Homo sapiens OX=9606 GN=CTPS1 PE=1 SV=2	CTP synthase 1	CTPS1	76.25	1675.57	-1.9	571	584	S1:Phosphorylation (STY):0.00;S4:Phosphorylation (STY):20.92;S5:Phosphorylation (STY):22.34	S575	DRSGSSSPDSEIT	1746.27	14204
Q76FK4	Q76FK4|NOL8_HUMAN	S	LFDSSDDDES(+79.97)DS(+79.97)EDDSNR	10	18	Nucleolar protein 8 OS=Homo sapiens OX=9606 GN=NOL8 PE=1 SV=1	Nucleolar protein 8	NOL8	49.28	2206.67	-0.2	834	851	S10:Phosphorylation (STY):35.17;S12:Phosphorylation (STY):22.37	S843	SSDDDESDSEDDS	52.9713	431.266
Q76FK4	Q76FK4|NOL8_HUMAN	S	LFDSSDDDES(+79.97)DS(+79.97)EDDSNR	12	18	Nucleolar protein 8 OS=Homo sapiens OX=9606 GN=NOL8 PE=1 SV=1	Nucleolar protein 8	NOL8	49.28	2206.67	-0.2	834	851	S10:Phosphorylation (STY):35.17;S12:Phosphorylation (STY):22.37	S845	DDDESDSEDDSNR	52.9713	431.266
Q99666	Q99666|RGPD5_HUMAN:O14715|RGPD8_HUMAN:P49792|RBP2_HUMAN	S	EDALDDSVSSSSVHAS(+79.97)PLASS(+79.97)PVRK	16	25	RANBP2-like and GRIP domain-containing protein 5/6 OS=Homo sapiens OX=9606 GN=RGPD6 PE=1 SV=3	RANBP2-like and GRIP domain-containing protein 5/6	RGPD6	64.62	2700.17	-4.1	1255	1279	S16:Phosphorylation (STY):3.36;S21:Phosphorylation (STY):0.00	S1270	SSSVHASPLASSP	8950.92	72973.9
Q99666	Q99666|RGPD5_HUMAN:O14715|RGPD8_HUMAN:P49792|RBP2_HUMAN	S	EDALDDSVSSSSVHAS(+79.97)PLASS(+79.97)PVRK	21	25	RANBP2-like and GRIP domain-containing protein 5/6 OS=Homo sapiens OX=9606 GN=RGPD6 PE=1 SV=3	RANBP2-like and GRIP domain-containing protein 5/6	RGPD6	64.62	2700.17	-4.1	1255	1279	S16:Phosphorylation (STY):3.36;S21:Phosphorylation (STY):0.00	S1275	ASPLASSPVRKNL	8950.92	72973.9
Q8WV41	Q8WV41|SNX33_HUMAN	S	SGISTNHADYSSS(+79.97)PAGS(+79.97)PGAQVSLYNSPSVASPAR	13	35	Sorting nexin-33 OS=Homo sapiens OX=9606 GN=SNX33 PE=1 SV=1	Sorting nexin-33	SNX33	41.73	3578.54	3.3	61	95	S13:Phosphorylation (STY):0.00;S17:Phosphorylation (STY):8.82	S73	HADYSSSPAGSPG	195.953	1597.84
Q8WV41	Q8WV41|SNX33_HUMAN	S	SGISTNHADYSSS(+79.97)PAGS(+79.97)PGAQVSLYNSPSVASPAR	17	35	Sorting nexin-33 OS=Homo sapiens OX=9606 GN=SNX33 PE=1 SV=1	Sorting nexin-33	SNX33	41.73	3578.54	3.3	61	95	S13:Phosphorylation (STY):0.00;S17:Phosphorylation (STY):8.82	S77	SSSPAGSPGAQVS	195.953	1597.84
Q13823	Q13823|NOG2_HUMAN	S	DDAEES(+79.97)SS(+79.97)EPEEENVGNDTK	6	20	Nucleolar GTP-binding protein 2 OS=Homo sapiens OX=9606 GN=GNL2 PE=1 SV=1	Nucleolar GTP-binding protein 2	GNL2	75.86	2339.78	-0.4	575	594	S6:Phosphorylation (STY):8.69;S8:Phosphorylation (STY):8.69	S580	RDDAEESSSEPEE	4207.37	34347
Q13823	Q13823|NOG2_HUMAN	S	DDAEES(+79.97)SS(+79.97)EPEEENVGNDTK	8	20	Nucleolar GTP-binding protein 2 OS=Homo sapiens OX=9606 GN=GNL2 PE=1 SV=1	Nucleolar GTP-binding protein 2	GNL2	75.86	2339.78	-0.4	575	594	S6:Phosphorylation (STY):8.69;S8:Phosphorylation (STY):8.69	S582	DAEESSSEPEEEN	4207.37	34347
Q8NC44	Q8NC44|RETR2_HUMAN	S	NAPPGGDEPLAETES(+79.97)ESEAELAGFSPVVDVK	15	31	Reticulophagy regulator 2 OS=Homo sapiens OX=9606 GN=RETREG2 PE=1 SV=3	Reticulophagy regulator 2	RETREG2	67.04	3220.43	1.9	267	297	S15:Phosphorylation (STY):0.00	S281	PLAETESESEAEL	450.915	3685.62
Q9NYL2	Q9NYL2|M3K20_HUMAN	S	SSS(+79.97)PTQYGLTK	3	11	Mitogen-activated protein kinase kinase kinase 20 OS=Homo sapiens OX=9606 GN=MAP3K20 PE=1 SV=3	Mitogen-activated protein kinase kinase kinase 20	MAP3K20	57.72	1247.54	-3.5	635	645	S3:Phosphorylation (STY):6.59	S637	NQSRSSSPTQYGL	2123.16	17373.9
O75376	O75376|NCOR1_HUMAN	S	EPAPLLSAQYETLS(+79.97)DS(+79.97)DD	14	18	Nuclear receptor corepressor 1 OS=Homo sapiens OX=9606 GN=NCOR1 PE=1 SV=2	Nuclear receptor corepressor 1	NCOR1	59.43	2109.81	1	2423	2440	S14:Phosphorylation (STY):60.92;S16:Phosphorylation (STY):58.99	S2436	AQYETLSDSDD__	624.506	5113.25
O75376	O75376|NCOR1_HUMAN	S	EPAPLLSAQYETLS(+79.97)DS(+79.97)DD	16	18	Nuclear receptor corepressor 1 OS=Homo sapiens OX=9606 GN=NCOR1 PE=1 SV=2	Nuclear receptor corepressor 1	NCOR1	59.43	2109.81	1	2423	2440	S14:Phosphorylation (STY):60.92;S16:Phosphorylation (STY):58.99	S2438	YETLSDSDD____	624.506	5113.25
Q13428	Q13428|TCOF_HUMAN	S	VSDPIS(+79.97)T(+79.97)S(+79.97)ESSEEEEEAEAETAK	6	23	Treacle protein OS=Homo sapiens OX=9606 GN=TCOF1 PE=1 SV=3	Treacle protein	TCOF1	31.96	2692.94	-0.7	78	100	S6:Phosphorylation (STY):6.65;T7:Phosphorylation (STY):0.00;S8:Phosphorylation (STY):0.00	S83	RVSDPISTSESSE	1272.71	10443.5
Q13428	Q13428|TCOF_HUMAN	T	VSDPIS(+79.97)T(+79.97)S(+79.97)ESSEEEEEAEAETAK	7	23	Treacle protein OS=Homo sapiens OX=9606 GN=TCOF1 PE=1 SV=3	Treacle protein	TCOF1	31.96	2692.94	-0.7	78	100	S6:Phosphorylation (STY):6.65;T7:Phosphorylation (STY):0.00;S8:Phosphorylation (STY):0.00	T84	VSDPISTSESSEE	1272.71	10443.5
Q13428	Q13428|TCOF_HUMAN	S	VSDPIS(+79.97)T(+79.97)S(+79.97)ESSEEEEEAEAETAK	8	23	Treacle protein OS=Homo sapiens OX=9606 GN=TCOF1 PE=1 SV=3	Treacle protein	TCOF1	31.96	2692.94	-0.7	78	100	S6:Phosphorylation (STY):6.65;T7:Phosphorylation (STY):0.00;S8:Phosphorylation (STY):0.00	S85	SDPISTSESSEEE	1272.71	10443.5
Q09666	Q09666|AHNK_HUMAN	S	VSVGAPDLS(+79.97)LEASEGSIK	9	18	Neuroblast differentiation-associated protein AHNAK OS=Homo sapiens OX=9606 GN=AHNAK PE=1 SV=2	Neuroblast differentiation-associated protein AHNAK	AHNAK	54.68	1837.87	3.3	5385	5402	S9:Phosphorylation (STY):33.81	S5393	VGAPDLSLEASEG	327.133	2685.8
P35611	P35611|ADDA_HUMAN	S	KYS(+79.97)DVEVPASVTGYSFASDGDSGTC(+57.02)SPLR	3	29	Alpha-adducin OS=Homo sapiens OX=9606 GN=ADD1 PE=1 SV=2	Alpha-adducin	ADD1	78.42	3131.34	3.8	406	434	S3:Phosphorylation (STY):0.00;C25:Carbamidomethylation:1000.00	S408	EKSKKYSDVEVPA	140.49	1154.93
Q5W0B1	Q5W0B1|OBI1_HUMAN	S	S(+79.97)SQGSEFLEEPDKLEEK	1	17	ORC ubiquitin ligase 1 OS=Homo sapiens OX=9606 GN=OBI1 PE=1 SV=1	ORC ubiquitin ligase 1	OBI1	43.91	2030.87	2.3	570	586	S1:Phosphorylation (STY):0.00	S570	LDGLSKSSQGSEF	322.72	2659.99
Q9NVP1	Q9NVP1|DDX18_HUMAN	S	QKPMNVGLSETQNGGMS(+79.97)QEAVGNIK	17	25	ATP-dependent RNA helicase DDX18 OS=Homo sapiens OX=9606 GN=DDX18 PE=1 SV=2	ATP-dependent RNA helicase DDX18	DDX18	34.58	2696.23	-3	58	82	S17:Phosphorylation (STY):26.50	S74	TQNGGMSQEAVGN	76.4634	631.1
Q9Y5X1	Q9Y5X1|SNX9_HUMAN	S	ASSSS(+79.97)MKIPLNK	5	12	Sorting nexin-9 OS=Homo sapiens OX=9606 GN=SNX9 PE=1 SV=1	Sorting nexin-9	SNX9	49.41	1341.64	-0.3	196	207	S5:Phosphorylation (STY):11.06	S200	SRASSSSMKIPLN	71.3724	591.143
Q15021	Q15021|CND1_HUMAN	T	LLENPT(+79.97)INHQKNRPT(+79.97)R	6	16	Condensin complex subunit 1 OS=Homo sapiens OX=9606 GN=NCAPD2 PE=1 SV=3	Condensin complex subunit 1	NCAPD2	20.64	2089.98	2.6	205	220		T210	RLLENPTINHQKN	60.8146	504.653
Q15021	Q15021|CND1_HUMAN	T	LLENPT(+79.97)INHQKNRPT(+79.97)R	15	16	Condensin complex subunit 1 OS=Homo sapiens OX=9606 GN=NCAPD2 PE=1 SV=3	Condensin complex subunit 1	NCAPD2	20.64	2089.98	2.6	205	220		T219	HQKNRPTREAITH	60.8146	504.653
Q5T1M5	Q5T1M5|FKB15_HUMAN	S	DSGS(+79.97)DGHSVSSR	4	12	FK506-binding protein 15 OS=Homo sapiens OX=9606 GN=FKBP15 PE=1 SV=2	FK506-binding protein 15	FKBP15	23.1	1269.46	2.5	294	305	S4:Phosphorylation (STY):0.00	S297	FARDSGSDGHSVS	111.687	927.246
Q66K14	Q66K14|TBC9B_HUMAN	S	ASVVDPSTESSPAPQEGSEQPASPAS(+79.97)PLSSR	26	31	TBC1 domain family member 9B OS=Homo sapiens OX=9606 GN=TBC1D9B PE=1 SV=3	TBC1 domain family member 9B	TBC1D9B	87.42	3131.39	-0.8	410	440	S26:Phosphorylation (STY):6.57	S435	QPASPASPLSSRQ	3052.52	25352.5
Q96JH7	Q96JH7|VCIP1_HUMAN	S	GNS(+79.97)VEELEEMDSQDAEMTNTTEPMDHS	3	27	Deubiquitinating protein VCPIP1 OS=Homo sapiens OX=9606 GN=VCPIP1 PE=1 SV=2	Deubiquitinating protein VCPIP1	VCPIP1	66.93	3105.14	-1.1	1196	1222	S3:Phosphorylation (STY):61.14	S1198	KAQRGNSVEELEE	564.015	4695.27
P60900	P60900|PSA6_HUMAN	T	H(+42.01)IT(+79.97)IFSPEGR	3	10	Proteasome subunit alpha type-6 OS=Homo sapiens OX=9606 GN=PSMA6 PE=1 SV=1	Proteasome subunit alpha type-6	PSMA6	27.59	1277.58	-0.9	12	21	H1:Acetylation (Protein N-term):1000.00;T3:Phosphorylation (STY):48.45	T14	GFDRHITIFSPEG	701.65	5841.98
Q8WWI1	Q8WWI1|LMO7_HUMAN	T	AT(+79.97)LSSTSGLDLMSESGEGEISPQR	2	24	LIM domain only protein 7 OS=Homo sapiens OX=9606 GN=LMO7 PE=1 SV=3	LIM domain only protein 7	LMO7	21.68	2531.11	-4	1006	1029	T2:Phosphorylation (STY):0.00	T1007	AATSKATLSSTSG	151.514	1262.14
P46821	P46821|MAP1B_HUMAN	S	FEDEGAGFEES(+79.97)S(+79.97)ET(+79.97)GDYEEK	11	20	Microtubule-associated protein 1B OS=Homo sapiens OX=9606 GN=MAP1B PE=1 SV=2	Microtubule-associated protein 1B	MAP1B	35.29	2493.77	3.8	926	945	S11:Phosphorylation (STY):15.01;S12:Phosphorylation (STY):9.30;T14:Phosphorylation (STY):12.33	S936	GAGFEESSETGDY	57.5091	479.757
P46821	P46821|MAP1B_HUMAN	S	FEDEGAGFEES(+79.97)S(+79.97)ET(+79.97)GDYEEK	12	20	Microtubule-associated protein 1B OS=Homo sapiens OX=9606 GN=MAP1B PE=1 SV=2	Microtubule-associated protein 1B	MAP1B	35.29	2493.77	3.8	926	945	S11:Phosphorylation (STY):15.01;S12:Phosphorylation (STY):9.30;T14:Phosphorylation (STY):12.33	S937	AGFEESSETGDYE	57.5091	479.757
P46821	P46821|MAP1B_HUMAN	T	FEDEGAGFEES(+79.97)S(+79.97)ET(+79.97)GDYEEK	14	20	Microtubule-associated protein 1B OS=Homo sapiens OX=9606 GN=MAP1B PE=1 SV=2	Microtubule-associated protein 1B	MAP1B	35.29	2493.77	3.8	926	945	S11:Phosphorylation (STY):15.01;S12:Phosphorylation (STY):9.30;T14:Phosphorylation (STY):12.33	T939	FEESSETGDYEEK	57.5091	479.757
Q96AJ1	Q96AJ1|CLUA1_HUMAN	S	SGSNDDS(+79.97)DIDIQEDDES(+79.97)DSELEER	7	24	Clusterin-associated protein 1 OS=Homo sapiens OX=9606 GN=CLUAP1 PE=1 SV=4	Clusterin-associated protein 1	CLUAP1	37.13	2857.98	2.2	308	331	S7:Phosphorylation (STY):6.67;S17:Phosphorylation (STY):20.41	S314	SGSNDDSDIDIQE	259.443	2165.15
Q96AJ1	Q96AJ1|CLUA1_HUMAN	S	SGSNDDS(+79.97)DIDIQEDDES(+79.97)DSELEER	17	24	Clusterin-associated protein 1 OS=Homo sapiens OX=9606 GN=CLUAP1 PE=1 SV=4	Clusterin-associated protein 1	CLUAP1	37.13	2857.98	2.2	308	331	S7:Phosphorylation (STY):6.67;S17:Phosphorylation (STY):20.41	S324	IQEDDESDSELEE	259.443	2165.15
Q96JM3	Q96JM3|CHAP1_HUMAN:Q9ULM3|YETS2_HUMAN	S	TAPPAS(+79.97)PEARK	6	11	Chromosome alignment-maintaining phosphoprotein 1 OS=Homo sapiens OX=9606 GN=CHAMP1 PE=1 SV=2	Chromosome alignment-maintaining phosphoprotein 1	CHAMP1	22.21	1203.56	2	537	547	S6:Phosphorylation (STY):15.43	S542	KTAPPASPEARKR	167.141	1395
O75822	O75822|EIF3J_HUMAN	S	A(+42.01)AAAAAAGDSDSWDADAFS(+79.97)VEDPVRK	19	26	Eukaryotic translation initiation factor 3 subunit J OS=Homo sapiens OX=9606 GN=EIF3J PE=1 SV=2	Eukaryotic translation initiation factor 3 subunit J	EIF3J	38.86	2714.15	1.1	2	27	A1:Acetylation (Protein N-term):1000.00;S19:Phosphorylation (STY):0.00	S20	WDADAFSVEDPVR	777.12	6518.01
Q9P258	Q9P258|RCC2_HUMAN	S	C(+57.02)SSSSGGGS(+79.97)SGDEDGLELDGAPGGGK	9	26	Protein RCC2 OS=Homo sapiens OX=9606 GN=RCC2 PE=1 SV=2	Protein RCC2	RCC2	55.55	2418.91	0.5	42	67	C1:Carbamidomethylation:1000.00;S9:Phosphorylation (STY):0.00	S50	SSSGGGSSGDEDG	272.017	2283.29
P24928	P24928|RPB1_HUMAN	S	YS(+79.97)PTSPTYSPTSPVYTPTS(+79.97)PK	2	21	DNA-directed RNA polymerase II subunit RPB1 OS=Homo sapiens OX=9606 GN=POLR2A PE=1 SV=2	DNA-directed RNA polymerase II subunit RPB1	POLR2A	27.54	2417.01	-0.2	1888	1908	S2:Phosphorylation (STY):0.00;S19:Phosphorylation (STY):12.28	S1889	PTTPKYSPTSPTY	426.878	3585.18
P24928	P24928|RPB1_HUMAN	S	YS(+79.97)PTSPTYSPTSPVYTPTS(+79.97)PK	19	21	DNA-directed RNA polymerase II subunit RPB1 OS=Homo sapiens OX=9606 GN=POLR2A PE=1 SV=2	DNA-directed RNA polymerase II subunit RPB1	POLR2A	27.54	2417.01	-0.2	1888	1908	S2:Phosphorylation (STY):0.00;S19:Phosphorylation (STY):12.28	S1906	PVYTPTSPKYSPT	426.878	3585.18
Q02952	Q02952|AKA12_HUMAN	S	SATLS(+79.97)STESTAS(+79.97)EMQEEMK	5	19	A-kinase anchor protein 12 OS=Homo sapiens OX=9606 GN=AKAP12 PE=1 SV=4	A-kinase anchor protein 12	AKAP12	33.77	2205.81	-0.8	640	658	S5:Phosphorylation (STY):0.00;S12:Phosphorylation (STY):13.67	S644	VKSATLSSTESTA	60.5046	508.519
Q02952	Q02952|AKA12_HUMAN	S	SATLS(+79.97)STESTAS(+79.97)EMQEEMK	12	19	A-kinase anchor protein 12 OS=Homo sapiens OX=9606 GN=AKAP12 PE=1 SV=4	A-kinase anchor protein 12	AKAP12	33.77	2205.81	-0.8	640	658	S5:Phosphorylation (STY):0.00;S12:Phosphorylation (STY):13.67	S651	STESTASEMQEEM	60.5046	508.519
O75381	O75381|PEX14_HUMAN	S	SPSPSSPAAVNHHSSSDISPVSNESTS(+79.97)SSPGK	27	32	Peroxisomal membrane protein PEX14 OS=Homo sapiens OX=9606 GN=PEX14 PE=1 SV=1	Peroxisomal membrane protein PEX14	PEX14	36.13	3200.39	-5.2	247	278	S27:Phosphorylation (STY):0.00	S273	VSNESTSSSPGKE	3689.23	31019.1
Q7Z569	Q7Z569|BRAP_HUMAN	S	EC(+57.02)INAAPDSPS(+79.97)K	11	12	BRCA1-associated protein OS=Homo sapiens OX=9606 GN=BRAP PE=1 SV=2	BRCA1-associated protein	BRAP	54.55	1367.54	5	109	120	C2:Carbamidomethylation:1000.00;S11:Phosphorylation (STY):0.00	S119	AAPDSPSKQLPDQ	12891.9	108456
Q9Y4H2	Q9Y4H2|IRS2_HUMAN	S	ASSPAESS(+79.97)PEDSGYMR	8	16	Insulin receptor substrate 2 OS=Homo sapiens OX=9606 GN=IRS2 PE=1 SV=2	Insulin receptor substrate 2	IRS2	36.09	1749.66	-1.3	729	744	S8:Phosphorylation (STY):17.01	S736	SSPAESSPEDSGY	366.858	3086.45
P28290	P28290|ITPI2_HUMAN	S	QSTC(+57.02)S(+79.97)PGDHIIEITEVEEDLFPAETVELLR	5	30	Protein ITPRID2 OS=Homo sapiens OX=9606 GN=ITPRID2 PE=1 SV=3	Protein ITPRID2	ITPRID2	58.91	3506.62	-3.7	609	638	C4:Carbamidomethylation:1000.00;S5:Phosphorylation (STY):0.00	S613	TKQSTCSPGDHII	152.229	1283.08
Q92610	Q92610|ZN592_HUMAN	S	QES(+79.97)FEAEKDHITPSLLHNGFR	3	21	Zinc finger protein 592 OS=Homo sapiens OX=9606 GN=ZNF592 PE=1 SV=2	Zinc finger protein 592	ZNF592	49.87	2534.16	-3.7	76	96	S3:Phosphorylation (STY):7.81	S78	NTSRQESFEAEKD	75.5604	636.894
Q9Y6R4	Q9Y6R4|M3K4_HUMAN	T	SPESDLEDFSDETNT(+79.97)ENLYGTS(+79.97)PPSTPR	15	28	Mitogen-activated protein kinase kinase kinase 4 OS=Homo sapiens OX=9606 GN=MAP3K4 PE=1 SV=2	Mitogen-activated protein kinase kinase kinase 4	MAP3K4	38.01	3244.26	-5.2	63	90	T15:Phosphorylation (STY):0.00;S22:Phosphorylation (STY):0.00	T77	FSDETNTENLYGT	359.44	3030.75
Q9Y6R4	Q9Y6R4|M3K4_HUMAN	S	SPESDLEDFSDETNT(+79.97)ENLYGTS(+79.97)PPSTPR	22	28	Mitogen-activated protein kinase kinase kinase 4 OS=Homo sapiens OX=9606 GN=MAP3K4 PE=1 SV=2	Mitogen-activated protein kinase kinase kinase 4	MAP3K4	38.01	3244.26	-5.2	63	90	T15:Phosphorylation (STY):0.00;S22:Phosphorylation (STY):0.00	S84	ENLYGTSPPSTPR	359.44	3030.75
P49736	P49736|MCM2_HUMAN	T	AT(+79.97)EDGEEDEEMIESIENLEDLK	2	22	DNA replication licensing factor MCM2 OS=Homo sapiens OX=9606 GN=MCM2 PE=1 SV=4	DNA replication licensing factor MCM2	MCM2	38.06	2617.05	5.4	157	178	T2:Phosphorylation (STY):15.26	T158	RQVERATEDGEED	62.8456	529.94
P23588	P23588|IF4B_HUMAN	S	S(+79.97)LENETLNKEEDC(+57.02)HS(+79.97)PTSKPPKPDQPLK	1	28	Eukaryotic translation initiation factor 4B OS=Homo sapiens OX=9606 GN=EIF4B PE=1 SV=2	Eukaryotic translation initiation factor 4B	EIF4B	51.99	3377.49	-2.5	445	472	S1:Phosphorylation (STY):17.91;C13:Carbamidomethylation:1000.00;S15:Phosphorylation (STY):0.00	S445	RRESEKSLENETL	10238.1	86364.1
P23588	P23588|IF4B_HUMAN	S	S(+79.97)LENETLNKEEDC(+57.02)HS(+79.97)PTSKPPKPDQPLK	15	28	Eukaryotic translation initiation factor 4B OS=Homo sapiens OX=9606 GN=EIF4B PE=1 SV=2	Eukaryotic translation initiation factor 4B	EIF4B	51.99	3377.49	-2.5	445	472	S1:Phosphorylation (STY):17.91;C13:Carbamidomethylation:1000.00;S15:Phosphorylation (STY):0.00	S459	KEEDCHSPTSKPP	10238.1	86364.1
Q9UKA4	Q9UKA4|AKA11_HUMAN	S	YPSC(+57.02)ES(+79.97)VTDEYAGHLIQILK	6	20	A-kinase anchor protein 11 OS=Homo sapiens OX=9606 GN=AKAP11 PE=1 SV=1	A-kinase anchor protein 11	AKAP11	35.7	2402.09	2.7	1335	1354	C4:Carbamidomethylation:1000.00;S6:Phosphorylation (STY):3.64	S1340	KYPSCESVTDEYA	125.653	1061.06
P98175	P98175|RBM10_HUMAN	Y	HDY(+79.97)DDS(+79.97)SEEQSAEDSYEASPGSETQR	3	26	RNA-binding protein 10 OS=Homo sapiens OX=9606 GN=RBM10 PE=1 SV=3	RNA-binding protein 10	RBM10	80.67	3078.06	-4.5	55	80	Y3:Phosphorylation (STY):0.00;S6:Phosphorylation (STY):0.00	Y57	QEGKHDYDDSSEE	134.74	1137.92
P98175	P98175|RBM10_HUMAN	S	HDY(+79.97)DDS(+79.97)SEEQSAEDSYEASPGSETQR	6	26	RNA-binding protein 10 OS=Homo sapiens OX=9606 GN=RBM10 PE=1 SV=3	RNA-binding protein 10	RBM10	80.67	3078.06	-4.5	55	80	Y3:Phosphorylation (STY):0.00;S6:Phosphorylation (STY):0.00	S60	KHDYDDSSEEQSA	134.74	1137.92
Q8TEJ3	Q8TEJ3|SH3R3_HUMAN	S	AGS(+79.97)LDLNFTSPSR	3	13	E3 ubiquitin-protein ligase SH3RF3 OS=Homo sapiens OX=9606 GN=SH3RF3 PE=1 SV=2	E3 ubiquitin-protein ligase SH3RF3	SH3RF3	57.91	1443.64	-4.9	795	807	S3:Phosphorylation (STY):90.57	S797	LHRKAGSLDLNFT	64.2559	542.762
P78559	P78559|MAP1A_HUMAN	S	GPS(+79.97)PPLNGNILSC(+57.02)SPDRR	3	18	Microtubule-associated protein 1A OS=Homo sapiens OX=9606 GN=MAP1A PE=1 SV=6	Microtubule-associated protein 1A	MAP1A	38.38	2015.92	-2.8	2072	2089	S3:Phosphorylation (STY):46.57;C13:Carbamidomethylation:1000.00	S2074	ILSKGPSPPLNGN	396.455	3349.13
Q7Z3C6	Q7Z3C6|ATG9A_HUMAN	S	LEASYS(+79.97)DSPPGEEDLLVHVAEGSK	6	24	Autophagy-related protein 9A OS=Homo sapiens OX=9606 GN=ATG9A PE=1 SV=3	Autophagy-related protein 9A	ATG9A	49.93	2608.16	-0.7	11	34	S6:Phosphorylation (STY):0.00	S16	RLEASYSDSPPGE	1680.32	14214.7
P16383	P16383|GCFC2_HUMAN	S	NEETS(+79.97)EES(+79.97)QEDEKQDTWEQQQMR	5	23	Intron Large complex component GCFC2 OS=Homo sapiens OX=9606 GN=GCFC2 PE=1 SV=2	Intron Large complex component GCFC2	GCFC2	47.24	3043.11	-3	210	232	S5:Phosphorylation (STY):17.01;S8:Phosphorylation (STY):13.99	S214	SRNEETSEESQED	124.632	1055.87
P16383	P16383|GCFC2_HUMAN	S	NEETS(+79.97)EES(+79.97)QEDEKQDTWEQQQMR	8	23	Intron Large complex component GCFC2 OS=Homo sapiens OX=9606 GN=GCFC2 PE=1 SV=2	Intron Large complex component GCFC2	GCFC2	47.24	3043.11	-3	210	232	S5:Phosphorylation (STY):17.01;S8:Phosphorylation (STY):13.99	S217	EETSEESQEDEKQ	124.632	1055.87
Q9HCE3	Q9HCE3|ZN532_HUMAN	S	DSTFSQFS(+79.97)PIS(+79.97)SAEEFDDDEK	8	21	Zinc finger protein 532 OS=Homo sapiens OX=9606 GN=ZNF532 PE=1 SV=2	Zinc finger protein 532	ZNF532	45.09	2539.92	-3.4	123	143	S8:Phosphorylation (STY):0.00;S11:Phosphorylation (STY):0.00	S130	STFSQFSPISSAE	56.2033	477.372
Q9HCE3	Q9HCE3|ZN532_HUMAN	S	DSTFSQFS(+79.97)PIS(+79.97)SAEEFDDDEK	11	21	Zinc finger protein 532 OS=Homo sapiens OX=9606 GN=ZNF532 PE=1 SV=2	Zinc finger protein 532	ZNF532	45.09	2539.92	-3.4	123	143	S8:Phosphorylation (STY):0.00;S11:Phosphorylation (STY):0.00	S133	SQFSPISSAEEFD	56.2033	477.372
Q9H1E3	Q9H1E3|NUCKS_HUMAN	S	TSTS(+79.97)PPPEKS(+79.97)GDEGSEDEAPS(+79.97)GED	4	24	Nuclear ubiquitous casein and cyclin-dependent kinase substrate 1 OS=Homo sapiens OX=9606 GN=NUCKS1 PE=1 SV=1	Nuclear ubiquitous casein and cyclin-dependent kinase substrate 1	NUCKS1	45.3	2643.87	-1.4	220	243	S4:Phosphorylation (STY):0.00;S10:Phosphorylation (STY):7.38;S21:Phosphorylation (STY):41.57	S223	EKKTSTSPPPEKS	2576.42	21909.6
Q9H1E3	Q9H1E3|NUCKS_HUMAN	S	TSTS(+79.97)PPPEKS(+79.97)GDEGSEDEAPS(+79.97)GED	10	24	Nuclear ubiquitous casein and cyclin-dependent kinase substrate 1 OS=Homo sapiens OX=9606 GN=NUCKS1 PE=1 SV=1	Nuclear ubiquitous casein and cyclin-dependent kinase substrate 1	NUCKS1	45.3	2643.87	-1.4	220	243	S4:Phosphorylation (STY):0.00;S10:Phosphorylation (STY):7.38;S21:Phosphorylation (STY):41.57	S229	SPPPEKSGDEGSE	2576.42	21909.6
Q9H1E3	Q9H1E3|NUCKS_HUMAN	S	TSTS(+79.97)PPPEKS(+79.97)GDEGSEDEAPS(+79.97)GED	21	24	Nuclear ubiquitous casein and cyclin-dependent kinase substrate 1 OS=Homo sapiens OX=9606 GN=NUCKS1 PE=1 SV=1	Nuclear ubiquitous casein and cyclin-dependent kinase substrate 1	NUCKS1	45.3	2643.87	-1.4	220	243	S4:Phosphorylation (STY):0.00;S10:Phosphorylation (STY):7.38;S21:Phosphorylation (STY):41.57	S240	SEDEAPSGED___	2576.42	21909.6
P51114	P51114|FXR1_HUMAN	T	DPDSNPYSLLDNT(+79.97)ESDQTADT(+79.97)DASESHHSTNR	13	32	RNA-binding protein FXR1 OS=Homo sapiens OX=9606 GN=FXR1 PE=1 SV=3	RNA-binding protein FXR1	FXR1	44.63	3678.39	3.4	471	502	T13:Phosphorylation (STY):0.00;T21:Phosphorylation (STY):0.00	T483	YSLLDNTESDQTA	258.844	2201.33
P51114	P51114|FXR1_HUMAN	T	DPDSNPYSLLDNT(+79.97)ESDQTADT(+79.97)DASESHHSTNR	21	32	RNA-binding protein FXR1 OS=Homo sapiens OX=9606 GN=FXR1 PE=1 SV=3	RNA-binding protein FXR1	FXR1	44.63	3678.39	3.4	471	502	T13:Phosphorylation (STY):0.00;T21:Phosphorylation (STY):0.00	T491	SDQTADTDASESH	258.844	2201.33
Q63HK5	Q63HK5|TSH3_HUMAN	T	SDIDGAT(+79.97)LEEAEESTPAQK	7	19	Teashirt homolog 3 OS=Homo sapiens OX=9606 GN=TSHZ3 PE=1 SV=2	Teashirt homolog 3	TSHZ3	60.22	2069.87	1.7	872	890	T7:Phosphorylation (STY):41.57	T878	SDIDGATLEEAEE	53.8841	458.862
O75152	O75152|ZC11A_HUMAN	S	VESSENVPSPTHPPVVINAADDDEDDDDQFS(+79.97)EEGDETK	31	38	Zinc finger CCCH domain-containing protein 11A OS=Homo sapiens OX=9606 GN=ZC3H11A PE=1 SV=3	Zinc finger CCCH domain-containing protein 11A	ZC3H11A	43.83	4207.7	1.5	141	178	S31:Phosphorylation (STY):16.36	S171	DDDDQFSEEGDET	5046.68	43035.6
P45973	P45973|CBX5_HUMAN	T	T(+79.97)ADSS(+79.97)S(+79.97)S(+79.97)EDEEEYVVEK	1	17	Chromobox protein homolog 5 OS=Homo sapiens OX=9606 GN=CBX5 PE=1 SV=1	Chromobox protein homolog 5	CBX5	56.37	2222.65	0.9	8	24	T1:Phosphorylation (STY):0.00;S5:Phosphorylation (STY):0.00;S6:Phosphorylation (STY):7.32;S7:Phosphorylation (STY):5.77	T8	GKKTKRTADSSSS	671.163	5729.99
P45973	P45973|CBX5_HUMAN	S	T(+79.97)ADSS(+79.97)S(+79.97)S(+79.97)EDEEEYVVEK	5	17	Chromobox protein homolog 5 OS=Homo sapiens OX=9606 GN=CBX5 PE=1 SV=1	Chromobox protein homolog 5	CBX5	56.37	2222.65	0.9	8	24	T1:Phosphorylation (STY):0.00;S5:Phosphorylation (STY):0.00;S6:Phosphorylation (STY):7.32;S7:Phosphorylation (STY):5.77	S12	KRTADSSSSEDEE	671.163	5729.99
P45973	P45973|CBX5_HUMAN	S	T(+79.97)ADSS(+79.97)S(+79.97)S(+79.97)EDEEEYVVEK	6	17	Chromobox protein homolog 5 OS=Homo sapiens OX=9606 GN=CBX5 PE=1 SV=1	Chromobox protein homolog 5	CBX5	56.37	2222.65	0.9	8	24	T1:Phosphorylation (STY):0.00;S5:Phosphorylation (STY):0.00;S6:Phosphorylation (STY):7.32;S7:Phosphorylation (STY):5.77	S13	RTADSSSSEDEEE	671.163	5729.99
P45973	P45973|CBX5_HUMAN	S	T(+79.97)ADSS(+79.97)S(+79.97)S(+79.97)EDEEEYVVEK	7	17	Chromobox protein homolog 5 OS=Homo sapiens OX=9606 GN=CBX5 PE=1 SV=1	Chromobox protein homolog 5	CBX5	56.37	2222.65	0.9	8	24	T1:Phosphorylation (STY):0.00;S5:Phosphorylation (STY):0.00;S6:Phosphorylation (STY):7.32;S7:Phosphorylation (STY):5.77	S14	TADSSSSEDEEEY	671.163	5729.99
P52943	P52943|CRIP2_HUMAN	S	AS(+79.97)SVTTFTGEPNTC(+57.02)PR	2	16	Cysteine-rich protein 2 OS=Homo sapiens OX=9606 GN=CRIP2 PE=1 SV=1	Cysteine-rich protein 2	CRIP2	48.58	1803.75	2.4	113	128	S2:Phosphorylation (STY):0.00;C14:Carbamidomethylation:1000.00	S114	KGPSRASSVTTFT	185.651	1585.88
Q9NR19	Q9NR19|ACSA_HUMAN	S	AELGM(+15.99)GDSTSQS(+79.97)PPIKR	12	17	Acetyl-coenzyme A synthetase, cytoplasmic OS=Homo sapiens OX=9606 GN=ACSS2 PE=1 SV=1	Acetyl-coenzyme A synthetase, cytoplasmic	ACSS2	23.35	1868.83	0.2	256	272	M5:Oxidation (M):1000.00;S12:Phosphorylation (STY):11.12	S267	GDSTSQSPPIKRS	126.599	1081.68
P16234	P16234|PGFRA_HUMAN	T	HSSQT(+79.97)S(+79.97)EESAIETGSSSSTFIK	5	22	Platelet-derived growth factor receptor alpha OS=Homo sapiens OX=9606 GN=PDGFRA PE=1 SV=1	Platelet-derived growth factor receptor alpha	PDGFRA	47.55	2458.98	3.9	1040	1061	T5:Phosphorylation (STY):0.00;S6:Phosphorylation (STY):0.00	T1044	NRHSSQTSEESAI	2919.14	24944.4
P16234	P16234|PGFRA_HUMAN	S	HSSQT(+79.97)S(+79.97)EESAIETGSSSSTFIK	6	22	Platelet-derived growth factor receptor alpha OS=Homo sapiens OX=9606 GN=PDGFRA PE=1 SV=1	Platelet-derived growth factor receptor alpha	PDGFRA	47.55	2458.98	3.9	1040	1061	T5:Phosphorylation (STY):0.00;S6:Phosphorylation (STY):0.00	S1045	RHSSQTSEESAIE	2919.14	24944.4
Q96ST2	Q96ST2|IWS1_HUMAN	S	VVS(+79.97)DADDS(+79.97)DS(+79.97)DAVSDK	3	16	Protein IWS1 homolog OS=Homo sapiens OX=9606 GN=IWS1 PE=1 SV=2	Protein IWS1 homolog	IWS1	60.83	1863.57	1.4	413	428	S3:Phosphorylation (STY):119.62;S8:Phosphorylation (STY):56.47;S10:Phosphorylation (STY):68.53	S415	KKSRVVSDADDSD	730.798	6248.19
Q96ST2	Q96ST2|IWS1_HUMAN	S	VVS(+79.97)DADDS(+79.97)DS(+79.97)DAVSDK	8	16	Protein IWS1 homolog OS=Homo sapiens OX=9606 GN=IWS1 PE=1 SV=2	Protein IWS1 homolog	IWS1	60.83	1863.57	1.4	413	428	S3:Phosphorylation (STY):119.62;S8:Phosphorylation (STY):56.47;S10:Phosphorylation (STY):68.53	S420	VSDADDSDSDAVS	730.798	6248.19
Q96ST2	Q96ST2|IWS1_HUMAN	S	VVS(+79.97)DADDS(+79.97)DS(+79.97)DAVSDK	10	16	Protein IWS1 homolog OS=Homo sapiens OX=9606 GN=IWS1 PE=1 SV=2	Protein IWS1 homolog	IWS1	60.83	1863.57	1.4	413	428	S3:Phosphorylation (STY):119.62;S8:Phosphorylation (STY):56.47;S10:Phosphorylation (STY):68.53	S422	DADDSDSDAVSDK	730.798	6248.19
Q96ST2	Q96ST2|IWS1_HUMAN	S	VVS(+79.97)DADDSDS(+79.97)DAVS(+79.97)DK	3	16	Protein IWS1 homolog OS=Homo sapiens OX=9606 GN=IWS1 PE=1 SV=2	Protein IWS1 homolog	IWS1	59.86	1863.57	-1.3	413	428	S3:Phosphorylation (STY):56.51;S10:Phosphorylation (STY):25.66;S14:Phosphorylation (STY):69.64	S415	KKSRVVSDADDSD	730.798	6248.19
Q96ST2	Q96ST2|IWS1_HUMAN	S	VVS(+79.97)DADDSDS(+79.97)DAVS(+79.97)DK	10	16	Protein IWS1 homolog OS=Homo sapiens OX=9606 GN=IWS1 PE=1 SV=2	Protein IWS1 homolog	IWS1	59.86	1863.57	-1.3	413	428	S3:Phosphorylation (STY):56.51;S10:Phosphorylation (STY):25.66;S14:Phosphorylation (STY):69.64	S422	DADDSDSDAVSDK	730.798	6248.19
Q96ST2	Q96ST2|IWS1_HUMAN	S	VVS(+79.97)DADDSDS(+79.97)DAVS(+79.97)DK	14	16	Protein IWS1 homolog OS=Homo sapiens OX=9606 GN=IWS1 PE=1 SV=2	Protein IWS1 homolog	IWS1	59.86	1863.57	-1.3	413	428	S3:Phosphorylation (STY):56.51;S10:Phosphorylation (STY):25.66;S14:Phosphorylation (STY):69.64	S426	SDSDAVSDKSGKR	730.798	6248.19
Q13428	Q13428|TCOF_HUMAN	S	AVATAAQAQTGPEEDSGS(+79.97)S(+79.97)EEESDS(+79.97)EEEAETLAQVKPSGK	18	40	Treacle protein OS=Homo sapiens OX=9606 GN=TCOF1 PE=1 SV=3	Treacle protein	TCOF1	41.77	4288.7	-4.8	853	892	S18:Phosphorylation (STY):0.00;S19:Phosphorylation (STY):0.00;S25:Phosphorylation (STY):0.00	S870	PEEDSGSSEEESD	121.153	1036.03
Q13428	Q13428|TCOF_HUMAN	S	AVATAAQAQTGPEEDSGS(+79.97)S(+79.97)EEESDS(+79.97)EEEAETLAQVKPSGK	19	40	Treacle protein OS=Homo sapiens OX=9606 GN=TCOF1 PE=1 SV=3	Treacle protein	TCOF1	41.77	4288.7	-4.8	853	892	S18:Phosphorylation (STY):0.00;S19:Phosphorylation (STY):0.00;S25:Phosphorylation (STY):0.00	S871	EEDSGSSEEESDS	121.153	1036.03
Q13428	Q13428|TCOF_HUMAN	S	AVATAAQAQTGPEEDSGS(+79.97)S(+79.97)EEESDS(+79.97)EEEAETLAQVKPSGK	25	40	Treacle protein OS=Homo sapiens OX=9606 GN=TCOF1 PE=1 SV=3	Treacle protein	TCOF1	41.77	4288.7	-4.8	853	892	S18:Phosphorylation (STY):0.00;S19:Phosphorylation (STY):0.00;S25:Phosphorylation (STY):0.00	S877	SEEESDSEEEAET	121.153	1036.03
Q13428	Q13428|TCOF_HUMAN	S	QEDSES(+79.97)SEEES(+79.97)DS(+79.97)EEAAASPAQVK	6	24	Treacle protein OS=Homo sapiens OX=9606 GN=TCOF1 PE=1 SV=3	Treacle protein	TCOF1	36.08	2777.94	-4.1	759	782	S6:Phosphorylation (STY):0.00;S11:Phosphorylation (STY):4.08;S13:Phosphorylation (STY):9.45	S764	KQEDSESSEEESD	70.7847	605.505
Q13428	Q13428|TCOF_HUMAN	S	QEDSES(+79.97)SEEES(+79.97)DS(+79.97)EEAAASPAQVK	11	24	Treacle protein OS=Homo sapiens OX=9606 GN=TCOF1 PE=1 SV=3	Treacle protein	TCOF1	36.08	2777.94	-4.1	759	782	S6:Phosphorylation (STY):0.00;S11:Phosphorylation (STY):4.08;S13:Phosphorylation (STY):9.45	S769	ESSEEESDSEEAA	70.7847	605.505
Q13428	Q13428|TCOF_HUMAN	S	QEDSES(+79.97)SEEES(+79.97)DS(+79.97)EEAAASPAQVK	13	24	Treacle protein OS=Homo sapiens OX=9606 GN=TCOF1 PE=1 SV=3	Treacle protein	TCOF1	36.08	2777.94	-4.1	759	782	S6:Phosphorylation (STY):0.00;S11:Phosphorylation (STY):4.08;S13:Phosphorylation (STY):9.45	S771	SEEESDSEEAAAS	70.7847	605.505
O75475	O75475|PSIP1_HUMAN	T	TGVTST(+79.97)S(+79.97)DS(+79.97)EEEGDDQEGEK	6	20	PC4 and SFRS1-interacting protein OS=Homo sapiens OX=9606 GN=PSIP1 PE=1 SV=1	PC4 and SFRS1-interacting protein	PSIP1	35.11	2338.73	-1.8	267	286	T6:Phosphorylation (STY):4.75;S7:Phosphorylation (STY):4.12;S9:Phosphorylation (STY):8.77	T272	KTGVTSTSDSEEE	1258.2	10766.6
O75475	O75475|PSIP1_HUMAN	S	TGVTST(+79.97)S(+79.97)DS(+79.97)EEEGDDQEGEK	7	20	PC4 and SFRS1-interacting protein OS=Homo sapiens OX=9606 GN=PSIP1 PE=1 SV=1	PC4 and SFRS1-interacting protein	PSIP1	35.11	2338.73	-1.8	267	286	T6:Phosphorylation (STY):4.75;S7:Phosphorylation (STY):4.12;S9:Phosphorylation (STY):8.77	S273	TGVTSTSDSEEEG	1258.2	10766.6
O75475	O75475|PSIP1_HUMAN	S	TGVTST(+79.97)S(+79.97)DS(+79.97)EEEGDDQEGEK	9	20	PC4 and SFRS1-interacting protein OS=Homo sapiens OX=9606 GN=PSIP1 PE=1 SV=1	PC4 and SFRS1-interacting protein	PSIP1	35.11	2338.73	-1.8	267	286	T6:Phosphorylation (STY):4.75;S7:Phosphorylation (STY):4.12;S9:Phosphorylation (STY):8.77	S275	VTSTSDSEEEGDD	1258.2	10766.6
Q9NU22	Q9NU22|MDN1_HUMAN	T	EDSDT(+79.97)EEQVPEALER	5	15	Midasin OS=Homo sapiens OX=9606 GN=MDN1 PE=1 SV=2	Midasin	MDN1	50.73	1825.73	3.5	5013	5027	T5:Phosphorylation (STY):0.00	T5017	EREDSDTEEQVPE	74.984	641.853
Q8ND04	Q8ND04|SMG8_HUMAN:Q96NE9|FRMD6_HUMAN	S	EEDLGS(+79.97)PTGELTSK	6	14	Nonsense-mediated mRNA decay factor SMG8 OS=Homo sapiens OX=9606 GN=SMG8 PE=1 SV=1	Nonsense-mediated mRNA decay factor SMG8	SMG8	34.82	1541.65	0.9	464	477	S6:Phosphorylation (STY):11.10	S469	KEEDLGSPTGELT	2816.25	24113.1
Q8IY17	Q8IY17|PLPL6_HUMAN	S	DEGGS(+79.97)PEGAS(+79.97)PSTASEMEEEK	5	21	Patatin-like phospholipase domain-containing protein 6 OS=Homo sapiens OX=9606 GN=PNPLA6 PE=1 SV=3	Patatin-like phospholipase domain-containing protein 6	PNPLA6	40.23	2282.78	-2.2	1335	1355	S5:Phosphorylation (STY):38.97;S10:Phosphorylation (STY):7.32	S1339	SRDEGGSPEGASP	161.555	1383.25
Q8IY17	Q8IY17|PLPL6_HUMAN	S	DEGGS(+79.97)PEGAS(+79.97)PSTASEMEEEK	10	21	Patatin-like phospholipase domain-containing protein 6 OS=Homo sapiens OX=9606 GN=PNPLA6 PE=1 SV=3	Patatin-like phospholipase domain-containing protein 6	PNPLA6	40.23	2282.78	-2.2	1335	1355	S5:Phosphorylation (STY):38.97;S10:Phosphorylation (STY):7.32	S1344	GSPEGASPSTASE	161.555	1383.25
P46013	P46013|KI67_HUMAN	S	AQSLVIS(+79.97)PPAPSPR	7	14	Proliferation marker protein Ki-67 OS=Homo sapiens OX=9606 GN=MKI67 PE=1 SV=2	Proliferation marker protein Ki-67	MKI67	61.71	1498.75	-2.6	573	586	S7:Phosphorylation (STY):41.87	S579	AQSLVISPPAPSP	655.174	5617.69
Q9UJU6	Q9UJU6|DBNL_HUMAN	S	AMSTTSISS(+79.97)PQPGK	9	14	Drebrin-like protein OS=Homo sapiens OX=9606 GN=DBNL PE=1 SV=1	Drebrin-like protein	DBNL	53.18	1470.64	-0.1	267	280	S9:Phosphorylation (STY):26.02	S275	STTSISSPQPGKL	73.5352	630.849
Q13501	Q13501|SQSTM_HUMAN	S	EVDPSTGELQSLQMPESEGPS(+79.97)SLDPSQEGPTGLK	21	34	Sequestosome-1 OS=Homo sapiens OX=9606 GN=SQSTM1 PE=1 SV=1	Sequestosome-1	SQSTM1	76.38	3605.6	2.6	345	378	S21:Phosphorylation (STY):9.34	S365	PESEGPSSLDPSQ	1018.56	8753.51
P54725	P54725|RD23A_HUMAN	S	EDKS(+79.97)PS(+79.97)EESAPTTSPESVSGSVPSSGSSGR	4	30	UV excision repair protein RAD23 homolog A OS=Homo sapiens OX=9606 GN=RAD23A PE=1 SV=1	UV excision repair protein RAD23 homolog A	RAD23A	31.15	3081.23	-1.5	120	149	S4:Phosphorylation (STY):0.00;S6:Phosphorylation (STY):0.00	S123	AAREDKSPSEESA	155.762	1339.62
P54725	P54725|RD23A_HUMAN	S	EDKS(+79.97)PS(+79.97)EESAPTTSPESVSGSVPSSGSSGR	6	30	UV excision repair protein RAD23 homolog A OS=Homo sapiens OX=9606 GN=RAD23A PE=1 SV=1	UV excision repair protein RAD23 homolog A	RAD23A	31.15	3081.23	-1.5	120	149	S4:Phosphorylation (STY):0.00;S6:Phosphorylation (STY):0.00	S125	REDKSPSEESAPT	155.762	1339.62
Q4G0J3	Q4G0J3|LARP7_HUMAN	S	S(+79.97)RPTSEGSDIESTEPQK	1	17	La-related protein 7 OS=Homo sapiens OX=9606 GN=LARP7 PE=1 SV=1	La-related protein 7	LARP7	41.6	1926.82	1.7	254	270	S1:Phosphorylation (STY):0.00	S254	ISKMKRSRPTSEG	243.929	2098.39
Q2NKX8	Q2NKX8|ERC6L_HUMAN	S	S(+79.97)LINMVLDHVEDMEER	1	16	DNA excision repair protein ERCC-6-like OS=Homo sapiens OX=9606 GN=ERCC6L PE=1 SV=1	DNA excision repair protein ERCC-6-like	ERCC6L	54.87	2008.86	1.1	1098	1113		S1098	SLASRRSLINMVL	285.104	2453.37
O00193	O00193|SMAP_HUMAN	S	HC(+57.02)GLGFSEVEDHDGEGDVAGDDDDDDDDS(+79.97)PD	29	31	Small acidic protein OS=Homo sapiens OX=9606 GN=SMAP PE=1 SV=1	Small acidic protein	SMAP	94.95	3385.13	-1.6	99	129	C2:Carbamidomethylation:1000.00;S29:Phosphorylation (STY):112.59	S127	DDDDDDSPDPESP	266.254	2291.18
Q9H0H5	Q9H0H5|RGAP1_HUMAN	S	SIGS(+79.97)AVDQGNESIVAK	4	16	Rac GTPase-activating protein 1 OS=Homo sapiens OX=9606 GN=RACGAP1 PE=1 SV=1	Rac GTPase-activating protein 1	RACGAP1	63.36	1653.76	-0.3	203	218	S4:Phosphorylation (STY):12.16	S206	KTRSIGSAVDQGN	159.827	1375.58
Q9Y2X3	Q9Y2X3|NOP58_HUMAN	S	LNLSC(+57.02)IHS(+79.97)PVVNELMR	8	16	Nucleolar protein 58 OS=Homo sapiens OX=9606 GN=NOP58 PE=1 SV=1	Nucleolar protein 58	NOP58	28.43	1960.93	-2.2	102	117	C5:Carbamidomethylation:1000.00;S8:Phosphorylation (STY):0.00	S109	NLSCIHSPVVNEL	83.4743	718.73
P16070	P16070|CD44_HUMAN	S	ESS(+79.97)ETPDQFM(+15.99)TADETR	3	16	CD44 antigen OS=Homo sapiens OX=9606 GN=CD44 PE=1 SV=3	CD44 antigen	CD44	46.83	1938.72	4.2	716	731	S3:Phosphorylation (STY):0.00;M10:Oxidation (M):1000.00	S718	LVNKESSETPDQF	34.5638	297.843
P85037	P85037|FOXK1_HUMAN	S	SM(+15.99)VSPVPS(+79.97)PTGTISVPNSC(+57.02)PAS(+79.97)PR	8	24	Forkhead box protein K1 OS=Homo sapiens OX=9606 GN=FOXK1 PE=1 SV=1	Forkhead box protein K1	FOXK1	49.77	2600.11	1.5	236	259	M2:Oxidation (M):1000.00;S8:Phosphorylation (STY):0.00;C19:Carbamidomethylation:1000.00;S22:Phosphorylation (STY):8.26	S243	MVSPVPSPTGTIS	668.117	5771.37
P85037	P85037|FOXK1_HUMAN	S	SM(+15.99)VSPVPS(+79.97)PTGTISVPNSC(+57.02)PAS(+79.97)PR	22	24	Forkhead box protein K1 OS=Homo sapiens OX=9606 GN=FOXK1 PE=1 SV=1	Forkhead box protein K1	FOXK1	49.77	2600.11	1.5	236	259	M2:Oxidation (M):1000.00;S8:Phosphorylation (STY):0.00;C19:Carbamidomethylation:1000.00;S22:Phosphorylation (STY):8.26	S257	PNSCPASPRGAGS	668.117	5771.37
Q9H814	Q9H814|PHAX_HUMAN	S	A(+42.01)LEVGDMEDGQLSDSDS(+79.97)DM(+15.99)T(+79.97)VAPSDRPLQLPK	17	32	Phosphorylated adapter RNA export protein OS=Homo sapiens OX=9606 GN=PHAX PE=1 SV=1	Phosphorylated adapter RNA export protein	PHAX	46.98	3633.51	4.3	2	33	A1:Acetylation (Protein N-term):1000.00;S17:Phosphorylation (STY):8.26;M19:Oxidation (M):27.62;T20:Phosphorylation (STY):6.08	S18	QLSDSDSDMTVAP	58.4085	505.495
Q9H814	Q9H814|PHAX_HUMAN	T	A(+42.01)LEVGDMEDGQLSDSDS(+79.97)DM(+15.99)T(+79.97)VAPSDRPLQLPK	20	32	Phosphorylated adapter RNA export protein OS=Homo sapiens OX=9606 GN=PHAX PE=1 SV=1	Phosphorylated adapter RNA export protein	PHAX	46.98	3633.51	4.3	2	33	A1:Acetylation (Protein N-term):1000.00;S17:Phosphorylation (STY):8.26;M19:Oxidation (M):27.62;T20:Phosphorylation (STY):6.08	T21	DSDSDMTVAPSDR	58.4085	505.495
P78362	P78362|SRPK2_HUMAN	T	T(+79.97)VS(+79.97)ASST(+79.97)GDLPK	1	12	SRSF protein kinase 2 OS=Homo sapiens OX=9606 GN=SRPK2 PE=1 SV=3	SRSF protein kinase 2	SRPK2	47.08	1401.49	-3.8	492	503	T1:Phosphorylation (STY):42.89;S3:Phosphorylation (STY):22.85;T7:Phosphorylation (STY):0.00	T492	SHDRSRTVSASST	101.396	879.164
P78362	P78362|SRPK2_HUMAN	S	T(+79.97)VS(+79.97)ASST(+79.97)GDLPK	3	12	SRSF protein kinase 2 OS=Homo sapiens OX=9606 GN=SRPK2 PE=1 SV=3	SRSF protein kinase 2	SRPK2	47.08	1401.49	-3.8	492	503	T1:Phosphorylation (STY):42.89;S3:Phosphorylation (STY):22.85;T7:Phosphorylation (STY):0.00	S494	DRSRTVSASSTGD	101.396	879.164
P78362	P78362|SRPK2_HUMAN	T	T(+79.97)VS(+79.97)ASST(+79.97)GDLPK	7	12	SRSF protein kinase 2 OS=Homo sapiens OX=9606 GN=SRPK2 PE=1 SV=3	SRSF protein kinase 2	SRPK2	47.08	1401.49	-3.8	492	503	T1:Phosphorylation (STY):42.89;S3:Phosphorylation (STY):22.85;T7:Phosphorylation (STY):0.00	T498	TVSASSTGDLPKA	101.396	879.164
P18206	P18206|VINC_HUMAN	T	MQEAMTQEVSDVFSDT(+79.97)TTPIK	16	21	Vinculin OS=Homo sapiens OX=9606 GN=VCL PE=1 SV=4	Vinculin	VCL	53.56	2437.04	-0.1	587	607	T16:Phosphorylation (STY):0.00	T602	SDVFSDTTTPIKL	197.469	1714.77
Q13557	Q13557|KCC2D_HUMAN	S	ESTES(+79.97)SNTT(+79.97)IEDEDVK	5	16	Calcium/calmodulin-dependent protein kinase type II subunit delta OS=Homo sapiens OX=9606 GN=CAMK2D PE=1 SV=3	Calcium/calmodulin-dependent protein kinase type II subunit delta	CAMK2D	53.71	1942.7	1.7	329	344	S5:Phosphorylation (STY):11.06;T9:Phosphorylation (STY):11.06	S333	VKESTESSNTTIE	153.776	1335.68
Q13557	Q13557|KCC2D_HUMAN	T	ESTES(+79.97)SNTT(+79.97)IEDEDVK	9	16	Calcium/calmodulin-dependent protein kinase type II subunit delta OS=Homo sapiens OX=9606 GN=CAMK2D PE=1 SV=3	Calcium/calmodulin-dependent protein kinase type II subunit delta	CAMK2D	53.71	1942.7	1.7	329	344	S5:Phosphorylation (STY):11.06;T9:Phosphorylation (STY):11.06	T337	TESSNTTIEDEDV	153.776	1335.68
Q01433	Q01433|AMPD2_HUMAN	S	TDS(+79.97)DSDLQLYK	3	11	AMP deaminase 2 OS=Homo sapiens OX=9606 GN=AMPD2 PE=1 SV=2	AMP deaminase 2	AMPD2	65.87	1363.55	-1.8	188	198	S3:Phosphorylation (STY):18.53	S190	DFLKTDSDSDLQL	2241.26	19485.5
Q9H773	Q9H773|DCTP1_HUMAN	T	KYTELPHGAISEDQAVGPADIPC(+57.02)DSTGQTST(+79.97)	31	31	dCTP pyrophosphatase 1 OS=Homo sapiens OX=9606 GN=DCTPP1 PE=1 SV=1	dCTP pyrophosphatase 1	DCTPP1	34.86	3324.45	3.1	140	170	C23:Carbamidomethylation:1000.00;T31:Phosphorylation (STY):0.00	T170	STGQTST______	184.312	1606.71
P83916	P83916|CBX1_HUMAN	S	ADS(+79.97)DSEDKGEESKPK	3	15	Chromobox protein homolog 1 OS=Homo sapiens OX=9606 GN=CBX1 PE=1 SV=1	Chromobox protein homolog 1	CBX1	67.39	1700.68	-2.3	87	101	S3:Phosphorylation (STY):45.01	S89	GKRKADSDSEDKG	11077.2	96700.7
Q13459	Q13459|MYO9B_HUMAN	S	AAGMSSPGAQS(+79.97)HPEELPR	11	18	Unconventional myosin-IXb OS=Homo sapiens OX=9606 GN=MYO9B PE=1 SV=3	Unconventional myosin-IXb	MYO9B	37.24	1900.81	-6.3	712	729	S11:Phosphorylation (STY):0.00	S722	SSPGAQSHPEELP	404.332	3533.26
Q9BYK8	Q9BYK8|HELZ2_HUMAN:P51148|RAB5C_HUMAN	S	AEPGDEALS(+79.97)PASR	9	13	Helicase with zinc finger domain 2 OS=Homo sapiens OX=9606 GN=HELZ2 PE=1 SV=6	Helicase with zinc finger domain 2	HELZ2	52.84	1378.58	-0.7	998	1010	S9:Phosphorylation (STY):12.16	S1006	PGDEALSPASRDI	463.683	4056.28
Q9Y2K6	Q9Y2K6|UBP20_HUMAN	S	AVPIAVADEGESES(+79.97)EDDDLKPR	14	22	Ubiquitin carboxyl-terminal hydrolase 20 OS=Homo sapiens OX=9606 GN=USP20 PE=1 SV=2	Ubiquitin carboxyl-terminal hydrolase 20	USP20	23.56	2421.06	5.8	121	142	S14:Phosphorylation (STY):4.64	S134	DEGESESEDDDLK	1826.62	16015.2
Q7Z4V5	Q7Z4V5|HDGR2_HUMAN	S	KAPS(+79.97)ASDSDS(+79.97)KADSDGAKPEPVAMAR	4	26	Hepatoma-derived growth factor-related protein 2 OS=Homo sapiens OX=9606 GN=HDGFL2 PE=1 SV=1	Hepatoma-derived growth factor-related protein 2	HDGFL2	30.95	2747.15	-2.4	227	252	S4:Phosphorylation (STY):0.00;S10:Phosphorylation (STY):6.65	S230	KKKKAPSASDSDS	961.551	8438.41
Q7Z4V5	Q7Z4V5|HDGR2_HUMAN	S	KAPS(+79.97)ASDSDS(+79.97)KADSDGAKPEPVAMAR	10	26	Hepatoma-derived growth factor-related protein 2 OS=Homo sapiens OX=9606 GN=HDGFL2 PE=1 SV=1	Hepatoma-derived growth factor-related protein 2	HDGFL2	30.95	2747.15	-2.4	227	252	S4:Phosphorylation (STY):0.00;S10:Phosphorylation (STY):6.65	S236	SASDSDSKADSDG	961.551	8438.41
Q9H8S9	Q9H8S9|MOB1A_HUMAN:Q7L9L4|MOB1B_HUMAN	S	HAEATLGS(+79.97)GNLR	8	12	MOB kinase activator 1A OS=Homo sapiens OX=9606 GN=MOB1A PE=1 SV=4	MOB kinase activator 1A	MOB1A	61.16	1304.59	1.7	31	42	S8:Phosphorylation (STY):41.20	S38	AEATLGSGNLRQA	230.194	2022.31
Q6VMQ6	Q6VMQ6|MCAF1_HUMAN	S	MES(+79.97)SFGSPS(+79.97)KQESSES(+79.97)LPK	3	19	Activating transcription factor 7-interacting protein 1 OS=Homo sapiens OX=9606 GN=ATF7IP PE=1 SV=3	Activating transcription factor 7-interacting protein 1	ATF7IP	25.62	2280.83	4.2	471	489	S3:Phosphorylation (STY):0.00;S9:Phosphorylation (STY):0.00;S16:Phosphorylation (STY):14.04	S473	LEEKMESSFGSPS	131.382	1157.3
Q6VMQ6	Q6VMQ6|MCAF1_HUMAN	S	MES(+79.97)SFGSPS(+79.97)KQESSES(+79.97)LPK	9	19	Activating transcription factor 7-interacting protein 1 OS=Homo sapiens OX=9606 GN=ATF7IP PE=1 SV=3	Activating transcription factor 7-interacting protein 1	ATF7IP	25.62	2280.83	4.2	471	489	S3:Phosphorylation (STY):0.00;S9:Phosphorylation (STY):0.00;S16:Phosphorylation (STY):14.04	S479	SSFGSPSKQESSE	131.382	1157.3
Q6VMQ6	Q6VMQ6|MCAF1_HUMAN	S	MES(+79.97)SFGSPS(+79.97)KQESSES(+79.97)LPK	16	19	Activating transcription factor 7-interacting protein 1 OS=Homo sapiens OX=9606 GN=ATF7IP PE=1 SV=3	Activating transcription factor 7-interacting protein 1	ATF7IP	25.62	2280.83	4.2	471	489	S3:Phosphorylation (STY):0.00;S9:Phosphorylation (STY):0.00;S16:Phosphorylation (STY):14.04	S486	KQESSESLPKEAF	131.382	1157.3
P46821	P46821|MAP1B_HUMAN	S	S(+79.97)AKT(+79.97)ATAGPGT(+79.97)T(+79.97)K	1	13	Microtubule-associated protein 1B OS=Homo sapiens OX=9606 GN=MAP1B PE=1 SV=2	Microtubule-associated protein 1B	MAP1B	21.82	1509.5	3.2	2331	2343	S1:Phosphorylation (STY):0.00;T4:Phosphorylation (STY):0.00;T11:Phosphorylation (STY):0.00;T12:Phosphorylation (STY):0.00	S2331	NASASKSAKTATA	70.4556	620.884
P46821	P46821|MAP1B_HUMAN	T	S(+79.97)AKT(+79.97)ATAGPGT(+79.97)T(+79.97)K	4	13	Microtubule-associated protein 1B OS=Homo sapiens OX=9606 GN=MAP1B PE=1 SV=2	Microtubule-associated protein 1B	MAP1B	21.82	1509.5	3.2	2331	2343	S1:Phosphorylation (STY):0.00;T4:Phosphorylation (STY):0.00;T11:Phosphorylation (STY):0.00;T12:Phosphorylation (STY):0.00	T2334	ASKSAKTATAGPG	70.4556	620.884
P46821	P46821|MAP1B_HUMAN	T	S(+79.97)AKT(+79.97)ATAGPGT(+79.97)T(+79.97)K	11	13	Microtubule-associated protein 1B OS=Homo sapiens OX=9606 GN=MAP1B PE=1 SV=2	Microtubule-associated protein 1B	MAP1B	21.82	1509.5	3.2	2331	2343	S1:Phosphorylation (STY):0.00;T4:Phosphorylation (STY):0.00;T11:Phosphorylation (STY):0.00;T12:Phosphorylation (STY):0.00	T2341	ATAGPGTTKTTKS	70.4556	620.884
P46821	P46821|MAP1B_HUMAN	T	S(+79.97)AKT(+79.97)ATAGPGT(+79.97)T(+79.97)K	12	13	Microtubule-associated protein 1B OS=Homo sapiens OX=9606 GN=MAP1B PE=1 SV=2	Microtubule-associated protein 1B	MAP1B	21.82	1509.5	3.2	2331	2343	S1:Phosphorylation (STY):0.00;T4:Phosphorylation (STY):0.00;T11:Phosphorylation (STY):0.00;T12:Phosphorylation (STY):0.00	T2342	TAGPGTTKTTKSS	70.4556	620.884
Q12929	Q12929|EPS8_HUMAN	S	ISAAASDSGVESFDEGSS(+79.97)H	18	19	Epidermal growth factor receptor kinase substrate 8 OS=Homo sapiens OX=9606 GN=EPS8 PE=1 SV=1	Epidermal growth factor receptor kinase substrate 8	EPS8	61.28	1931.74	2.4	804	822	S18:Phosphorylation (STY):8.69	S821	SFDEGSSH_____	392.892	3471.28
Q16799	Q16799|RTN1_HUMAN	S	GATPAPQAGEPS(+79.97)PGLGAR	12	18	Reticulon-1 OS=Homo sapiens OX=9606 GN=RTN1 PE=1 SV=1	Reticulon-1	RTN1	64.95	1712.79	0.5	37	54	S12:Phosphorylation (STY):77.76	S48	PQAGEPSPGLGAR	85.4168	754.726
P35658	P35658|NU214_HUMAN:Q9H4G0|E41L1_HUMAN	S	S(+79.97)PGST(+79.97)PTT(+79.97)PTSSQAPQK	1	17	Nuclear pore complex protein Nup214 OS=Homo sapiens OX=9606 GN=NUP214 PE=1 SV=2	Nuclear pore complex protein Nup214	NUP214	40.83	1910.71	1.2	430	446	S1:Phosphorylation (STY):12.33;T5:Phosphorylation (STY):14.02;T8:Phosphorylation (STY):11.10	S430	GERQPKSPGSTPT	585.088	5170.43
P35658	P35658|NU214_HUMAN:Q9H4G0|E41L1_HUMAN	T	S(+79.97)PGST(+79.97)PTT(+79.97)PTSSQAPQK	5	17	Nuclear pore complex protein Nup214 OS=Homo sapiens OX=9606 GN=NUP214 PE=1 SV=2	Nuclear pore complex protein Nup214	NUP214	40.83	1910.71	1.2	430	446	S1:Phosphorylation (STY):12.33;T5:Phosphorylation (STY):14.02;T8:Phosphorylation (STY):11.10	T434	PKSPGSTPTTPTS	585.088	5170.43
P35658	P35658|NU214_HUMAN:Q9H4G0|E41L1_HUMAN	T	S(+79.97)PGST(+79.97)PTT(+79.97)PTSSQAPQK	8	17	Nuclear pore complex protein Nup214 OS=Homo sapiens OX=9606 GN=NUP214 PE=1 SV=2	Nuclear pore complex protein Nup214	NUP214	40.83	1910.71	1.2	430	446	S1:Phosphorylation (STY):12.33;T5:Phosphorylation (STY):14.02;T8:Phosphorylation (STY):11.10	T437	PGSTPTTPTSSQA	585.088	5170.43
Q7Z4V5	Q7Z4V5|HDGR2_HUMAN	S	GPPS(+79.97)S(+79.97)S(+79.97)DS(+79.97)EPEAELER	4	16	Hepatoma-derived growth factor-related protein 2 OS=Homo sapiens OX=9606 GN=HDGFL2 PE=1 SV=1	Hepatoma-derived growth factor-related protein 2	HDGFL2	59.65	2005.6	0.9	392	407		S395	RGRGPPSSSDSEP	517	4573.96
Q7Z4V5	Q7Z4V5|HDGR2_HUMAN	S	GPPS(+79.97)S(+79.97)S(+79.97)DS(+79.97)EPEAELER	5	16	Hepatoma-derived growth factor-related protein 2 OS=Homo sapiens OX=9606 GN=HDGFL2 PE=1 SV=1	Hepatoma-derived growth factor-related protein 2	HDGFL2	59.65	2005.6	0.9	392	407		S396	GRGPPSSSDSEPE	517	4573.96
Q7Z4V5	Q7Z4V5|HDGR2_HUMAN	S	GPPS(+79.97)S(+79.97)S(+79.97)DS(+79.97)EPEAELER	6	16	Hepatoma-derived growth factor-related protein 2 OS=Homo sapiens OX=9606 GN=HDGFL2 PE=1 SV=1	Hepatoma-derived growth factor-related protein 2	HDGFL2	59.65	2005.6	0.9	392	407		S397	RGPPSSSDSEPEA	517	4573.96
Q7Z4V5	Q7Z4V5|HDGR2_HUMAN	S	GPPS(+79.97)S(+79.97)S(+79.97)DS(+79.97)EPEAELER	8	16	Hepatoma-derived growth factor-related protein 2 OS=Homo sapiens OX=9606 GN=HDGFL2 PE=1 SV=1	Hepatoma-derived growth factor-related protein 2	HDGFL2	59.65	2005.6	0.9	392	407		S399	PPSSSDSEPEAEL	517	4573.96
P29590	P29590|PML_HUMAN	S	AVS(+79.97)PPHLDGPPSPR	3	14	Protein PML OS=Homo sapiens OX=9606 GN=PML PE=1 SV=3	Protein PML	PML	62.8	1505.7	-1.3	516	529	S3:Phosphorylation (STY):84.02	S518	STSKAVSPPHLDG	4550.83	40394
P46013	P46013|KI67_HUMAN:O43166|SI1L1_HUMAN	S	S(+79.97)PQPDPVKT(+79.97)PTSSK	1	14	Proliferation marker protein Ki-67 OS=Homo sapiens OX=9606 GN=MKI67 PE=1 SV=2	Proliferation marker protein Ki-67	MKI67	24.84	1627.69	0.4	1983	1996	S1:Phosphorylation (STY):29.98;T9:Phosphorylation (STY):0.00	S1983	TEVSCKSPQPDPV	101.937	904.871
P46013	P46013|KI67_HUMAN:O43166|SI1L1_HUMAN	T	S(+79.97)PQPDPVKT(+79.97)PTSSK	9	14	Proliferation marker protein Ki-67 OS=Homo sapiens OX=9606 GN=MKI67 PE=1 SV=2	Proliferation marker protein Ki-67	MKI67	24.84	1627.69	0.4	1983	1996	S1:Phosphorylation (STY):29.98;T9:Phosphorylation (STY):0.00	T1991	QPDPVKTPTSSKQ	101.937	904.871
P17544	P17544|ATF7_HUMAN	S	IKEEEPVEVDSSPPDS(+79.97)PAS(+79.97)S(+79.97)PC(+57.02)SPPLK	16	27	Cyclic AMP-dependent transcription factor ATF-7 OS=Homo sapiens OX=9606 GN=ATF7 PE=1 SV=3	Cyclic AMP-dependent transcription factor ATF-7	ATF7	21.14	3117.26	-7.4	106	132	S16:Phosphorylation (STY):2.87;S19:Phosphorylation (STY):1.63;S20:Phosphorylation (STY):1.37;C22:Carbamidomethylation:1000.00	S121	DSSPPDSPASSPC	315.574	2808.15
P17544	P17544|ATF7_HUMAN	S	IKEEEPVEVDSSPPDS(+79.97)PAS(+79.97)S(+79.97)PC(+57.02)SPPLK	19	27	Cyclic AMP-dependent transcription factor ATF-7 OS=Homo sapiens OX=9606 GN=ATF7 PE=1 SV=3	Cyclic AMP-dependent transcription factor ATF-7	ATF7	21.14	3117.26	-7.4	106	132	S16:Phosphorylation (STY):2.87;S19:Phosphorylation (STY):1.63;S20:Phosphorylation (STY):1.37;C22:Carbamidomethylation:1000.00	S124	PPDSPASSPCSPP	315.574	2808.15
P17544	P17544|ATF7_HUMAN	S	IKEEEPVEVDSSPPDS(+79.97)PAS(+79.97)S(+79.97)PC(+57.02)SPPLK	20	27	Cyclic AMP-dependent transcription factor ATF-7 OS=Homo sapiens OX=9606 GN=ATF7 PE=1 SV=3	Cyclic AMP-dependent transcription factor ATF-7	ATF7	21.14	3117.26	-7.4	106	132	S16:Phosphorylation (STY):2.87;S19:Phosphorylation (STY):1.63;S20:Phosphorylation (STY):1.37;C22:Carbamidomethylation:1000.00	S125	PDSPASSPCSPPL	315.574	2808.15
Q8IXT5	Q8IXT5|RB12B_HUMAN	S	SEEHS(+79.97)PPR	5	8	RNA-binding protein 12B OS=Homo sapiens OX=9606 GN=RBM12B PE=1 SV=2	RNA-binding protein 12B	RBM12B	53.71	1017.39	5.2	250	257	S5:Phosphorylation (STY):51.80	S254	RRSEEHSPPRGIN	520.32	4631.05
Q53SF7	Q53SF7|COBL1_HUMAN	T	ENNSAHNEQNSQIPT(+79.97)PTDGPSFTVMR	15	26	Cordon-bleu protein-like 1 OS=Homo sapiens OX=9606 GN=COBLL1 PE=1 SV=3	Cordon-bleu protein-like 1	COBLL1	19.62	2950.26	7.9	1042	1067	T15:Phosphorylation (STY):0.00	T1056	QNSQIPTPTDGPS	529.73	4717.2
Q15678	Q15678|PTN14_HUMAN	S	TFSDATMLIHS(+79.97)S(+79.97)ESEEEEEEAPESVPQIPMLR	11	32	Tyrosine-protein phosphatase non-receptor type 14 OS=Homo sapiens OX=9606 GN=PTPN14 PE=1 SV=2	Tyrosine-protein phosphatase non-receptor type 14	PTPN14	67.54	3777.57	1.9	697	728	S11:Phosphorylation (STY):0.00;S12:Phosphorylation (STY):0.00	S707	ATMLIHSSESEEE	787.185	7010.94
Q15678	Q15678|PTN14_HUMAN	S	TFSDATMLIHS(+79.97)S(+79.97)ESEEEEEEAPESVPQIPMLR	12	32	Tyrosine-protein phosphatase non-receptor type 14 OS=Homo sapiens OX=9606 GN=PTPN14 PE=1 SV=2	Tyrosine-protein phosphatase non-receptor type 14	PTPN14	67.54	3777.57	1.9	697	728	S11:Phosphorylation (STY):0.00;S12:Phosphorylation (STY):0.00	S708	TMLIHSSESEEEE	787.185	7010.94
Q9Y6E0	Q9Y6E0|STK24_HUMAN	S	AEQSHDDSSSEDS(+79.97)DAETDGQASGGSDSGDWIFTIR	13	35	Serine/threonine-protein kinase 24 OS=Homo sapiens OX=9606 GN=STK24 PE=1 SV=1	Serine/threonine-protein kinase 24	STK24	69.58	3738.44	2.8	308	342	S13:Phosphorylation (STY):0.00	S320	DSSSEDSDAETDG	98.9543	881.686
Q9UQ35	Q9UQ35|SRRM2_HUMAN	S	SSGHSS(+79.97)SELSPDAVEK	6	16	Serine/arginine repetitive matrix protein 2 OS=Homo sapiens OX=9606 GN=SRRM2 PE=1 SV=2	Serine/arginine repetitive matrix protein 2	SRRM2	61.91	1695.7	-2	1378	1393	S6:Phosphorylation (STY):0.00	S1383	RSSGHSSSELSPD	5655.21	50415.2
Q9P275	Q9P275|UBP36_HUMAN	S	MSAVS(+79.97)QDAIEDSR	5	13	Ubiquitin carboxyl-terminal hydrolase 36 OS=Homo sapiens OX=9606 GN=USP36 PE=1 SV=4	Ubiquitin carboxyl-terminal hydrolase 36	USP36	54.05	1487.6	-4.5	1049	1061	S5:Phosphorylation (STY):50.22	S1053	GKMSAVSQDAIED	65.2711	582.974
Q9BV36	Q9BV36|MELPH_HUMAN:Q15154|PCM1_HUMAN	S	S(+79.97)GDSDQTDEDGEPGSEAQAQAQPFGSK	1	27	Melanophilin OS=Homo sapiens OX=9606 GN=MLPH PE=1 SV=1	Melanophilin	MLPH	68.71	2817.09	2.3	159	185	S1:Phosphorylation (STY):0.00	S159	LISEERSGDSDQT	3204.05	28620.2
Q9H425	Q9H425|CA198_HUMAN	S	LPS(+79.97)PDVR	3	7	Uncharacterized protein C1orf198 OS=Homo sapiens OX=9606 GN=C1orf198 PE=1 SV=1	Uncharacterized protein C1orf198	C1orf198	36.45	862.395	-4.7	287	293		S289	LEGKLPSPDVRQD	146.815	1311.82
Q9UDY2	Q96C57|CSTOS_HUMAN:Q9UDY2|ZO2_HUMAN	T	T(+79.97)FLRPSPEDEAIYGPNTK	1	18	Tight junction protein ZO-2 OS=Homo sapiens OX=9606 GN=TJP2 PE=1 SV=2	Tight junction protein ZO-2	TJP2	33.67	2113.97	-1.2	494	511	T1:Phosphorylation (STY):0.00	T494	PKAAPRTFLRPSP	419.538	3753.22
Q27J81	Q27J81|INF2_HUMAN	S	SFSEDAVTDSS(+79.97)GS(+79.97)GTLPR	11	18	Inverted formin-2 OS=Homo sapiens OX=9606 GN=INF2 PE=1 SV=2	Inverted formin-2	INF2	68.24	1971.75	2	1192	1209	S11:Phosphorylation (STY):0.00;S13:Phosphorylation (STY):9.42	S1202	DAVTDSSGSGTLP	965.724	8640.95
Q27J81	Q27J81|INF2_HUMAN	S	SFSEDAVTDSS(+79.97)GS(+79.97)GTLPR	13	18	Inverted formin-2 OS=Homo sapiens OX=9606 GN=INF2 PE=1 SV=2	Inverted formin-2	INF2	68.24	1971.75	2	1192	1209	S11:Phosphorylation (STY):0.00;S13:Phosphorylation (STY):9.42	S1204	VTDSSGSGTLPRA	965.724	8640.95
O75376	O75376|NCOR1_HUMAN	S	EPAPLLSAQYETLS(+79.97)DSDD	14	18	Nuclear receptor corepressor 1 OS=Homo sapiens OX=9606 GN=NCOR1 PE=1 SV=2	Nuclear receptor corepressor 1	NCOR1	57.82	2029.84	1.2	2423	2440	S14:Phosphorylation (STY):17.01	S2436	AQYETLSDSDD__	194.578	1745.01
Q96RN5	Q96RN5|MED15_HUMAN	S	TPQNFSVPS(+79.97)PGPLNTPVNPSSVMSPAGSSQAEEQQYLDK	9	39	Mediator of RNA polymerase II transcription subunit 15 OS=Homo sapiens OX=9606 GN=MED15 PE=1 SV=2	Mediator of RNA polymerase II transcription subunit 15	MED15	52.54	4164.9	0.3	497	535	S9:Phosphorylation (STY):1.69	S505	QNFSVPSPGPLNT	253.876	2280.56
O95684	O95684|CEP43_HUMAN	S	GPTTGEGALDLSDVHSPPKS(+79.97)PEGK	20	24	Centrosomal protein 43 OS=Homo sapiens OX=9606 GN=CEP43 PE=1 SV=1	Centrosomal protein 43	CEP43	55.69	2455.13	0.6	141	164	S20:Phosphorylation (STY):14.19	S160	VHSPPKSPEGKTS	746.866	6728.17
Q66K74	Q66K74|MAP1S_HUMAN	S	AVPMAPAPAS(+79.97)PGS(+79.97)SNDSSAR	10	20	Microtubule-associated protein 1S OS=Homo sapiens OX=9606 GN=MAP1S PE=1 SV=2	Microtubule-associated protein 1S	MAP1S	54.4	2028.8	2.7	750	769	S10:Phosphorylation (STY):19.86;S13:Phosphorylation (STY):33.98	S759	MAPAPASPGSSND	527.05	4748.69
Q66K74	Q66K74|MAP1S_HUMAN	S	AVPMAPAPAS(+79.97)PGS(+79.97)SNDSSAR	13	20	Microtubule-associated protein 1S OS=Homo sapiens OX=9606 GN=MAP1S PE=1 SV=2	Microtubule-associated protein 1S	MAP1S	54.4	2028.8	2.7	750	769	S10:Phosphorylation (STY):19.86;S13:Phosphorylation (STY):33.98	S762	APASPGSSNDSSA	527.05	4748.69
Q8NAV1	Q8NAV1|PR38A_HUMAN	S	VSALEEDMDDVES(+79.97)S(+79.97)EEEEEEDEK	13	23	Pre-mRNA-splicing factor 38A OS=Homo sapiens OX=9606 GN=PRPF38A PE=1 SV=1	Pre-mRNA-splicing factor 38A	PRPF38A	60.94	2830.97	-1.5	181	203	S13:Phosphorylation (STY):28.74;S14:Phosphorylation (STY):35.89	S193	DMDDVESSEEEEE	1065.29	9602.41
Q8NAV1	Q8NAV1|PR38A_HUMAN	S	VSALEEDMDDVES(+79.97)S(+79.97)EEEEEEDEK	14	23	Pre-mRNA-splicing factor 38A OS=Homo sapiens OX=9606 GN=PRPF38A PE=1 SV=1	Pre-mRNA-splicing factor 38A	PRPF38A	60.94	2830.97	-1.5	181	203	S13:Phosphorylation (STY):28.74;S14:Phosphorylation (STY):35.89	S194	MDDVESSEEEEEE	1065.29	9602.41
Q7Z3K3	Q7Z3K3|POGZ_HUMAN	T	TAPVASTPSSTPIPALSPPT(+79.97)KVPEPNENVGDAVQTK	20	36	Pogo transposable element with ZNF domain OS=Homo sapiens OX=9606 GN=POGZ PE=1 SV=2	Pogo transposable element with ZNF domain	POGZ	46.68	3676.82	3.4	429	464	T20:Phosphorylation (STY):0.00	T448	PALSPPTKVPEPN	4842.8	43668.3
Q13263	Q13263|TIF1B_HUMAN	S	FSAVLVEPPPM(+15.99)SLPGAGLSS(+79.97)QELSGGPGDGP	20	31	Transcription intermediary factor 1-beta OS=Homo sapiens OX=9606 GN=TRIM28 PE=1 SV=5	Transcription intermediary factor 1-beta	TRIM28	63.93	3045.4	2.4	805	835	M11:Oxidation (M):1000.00;S20:Phosphorylation (STY):14.02	S824	PGAGLSSQELSGG	104.812	946.925
Q9BQA1	Q9BQA1|MEP50_HUMAN	T	ET(+79.97)PPPLVPPAAR	2	12	Methylosome protein 50 OS=Homo sapiens OX=9606 GN=WDR77 PE=1 SV=1	Methylosome protein 50	WDR77	59.48	1323.66	-1.6	4	15		T5	__MRKETPPPLVP	231.692	2098.28
P49792	P49792|RBP2_HUMAN	S	S(+79.97)GSSFVHQASFK	1	12	E3 SUMO-protein ligase RanBP2 OS=Homo sapiens OX=9606 GN=RANBP2 PE=1 SV=2	E3 SUMO-protein ligase RanBP2	RANBP2	52.68	1360.58	-0.3	1447	1458	S1:Phosphorylation (STY):0.00	S1447	TKSANKSGSSFVH	551.057	5002.29
P18031	P18031|PTN1_HUMAN	S	GSPLNAAPYGIESMS(+79.97)QDTEVR	15	21	Tyrosine-protein phosphatase non-receptor type 1 OS=Homo sapiens OX=9606 GN=PTPN1 PE=1 SV=1	Tyrosine-protein phosphatase non-receptor type 1	PTPN1	49.63	2301	2.2	351	371	S15:Phosphorylation (STY):40.00	S365	YGIESMSQDTEVR	300.096	2724.64
Q8WUZ0	Q8WUZ0|BCL7C_HUMAN	T	GT(+79.97)EPSPGGTPQPSRPVS(+79.97)PAGPPEGVPEEAQPPR	2	33	B-cell CLL/lymphoma 7 protein family member C OS=Homo sapiens OX=9606 GN=BCL7C PE=1 SV=3	B-cell CLL/lymphoma 7 protein family member C	BCL7C	42.81	3418.52	1.7	110	142	T2:Phosphorylation (STY):0.00;S17:Phosphorylation (STY):0.00	T111	GSLQKGTEPSPGG	657.307	5971.99
Q8WUZ0	Q8WUZ0|BCL7C_HUMAN	S	GT(+79.97)EPSPGGTPQPSRPVS(+79.97)PAGPPEGVPEEAQPPR	17	33	B-cell CLL/lymphoma 7 protein family member C OS=Homo sapiens OX=9606 GN=BCL7C PE=1 SV=3	B-cell CLL/lymphoma 7 protein family member C	BCL7C	42.81	3418.52	1.7	110	142	T2:Phosphorylation (STY):0.00;S17:Phosphorylation (STY):0.00	S126	QPSRPVSPAGPPE	657.307	5971.99
Q13263	Q13263|TIF1B_HUMAN	S	STAPSAAAS(+79.97)ASASAAASSPAGGGAEALELLEHC(+57.02)GVC(+57.02)R	9	37	Transcription intermediary factor 1-beta OS=Homo sapiens OX=9606 GN=TRIM28 PE=1 SV=5	Transcription intermediary factor 1-beta	TRIM28	34.38	3521.56	-5.4	33	69	S9:Phosphorylation (STY):0.00;C33:Carbamidomethylation:1000.00;C36:Carbamidomethylation:1000.00	S41	APSAAASASASAA	1853.83	16853
Q96RK0	Q96RK0|CIC_HUMAN	S	KS(+79.97)S(+79.97)SEAKPTSLGLAGGHK	2	18	Protein capicua homolog OS=Homo sapiens OX=9606 GN=CIC PE=1 SV=2	Protein capicua homolog	CIC	22.46	1913.86	-6.1	276	293	S2:Phosphorylation (STY):6.59;S3:Phosphorylation (STY):0.00	S277	NKDRKKSSSEAKP	103.823	944.632
Q96RK0	Q96RK0|CIC_HUMAN	S	KS(+79.97)S(+79.97)SEAKPTSLGLAGGHK	3	18	Protein capicua homolog OS=Homo sapiens OX=9606 GN=CIC PE=1 SV=2	Protein capicua homolog	CIC	22.46	1913.86	-6.1	276	293	S2:Phosphorylation (STY):6.59;S3:Phosphorylation (STY):0.00	S278	KDRKKSSSEAKPT	103.823	944.632
Q9H3P7	Q9H3P7|GCP60_HUMAN	T	THT(+79.97)DSSEKELEPEAAEEALENGPK	3	24	Golgi resident protein GCP60 OS=Homo sapiens OX=9606 GN=ACBD3 PE=1 SV=4	Golgi resident protein GCP60	ACBD3	21.35	2690.16	1.7	340	363	T3:Phosphorylation (STY):0.00	T342	GQAKTHTDSSEKE	180.125	1639.08
Q15149	Q15149|PLEC_HUMAN	S	S(+79.97)RS(+79.97)S(+79.97)SVGSSS(+79.97)SYPISPAVSR	1	20	Plectin OS=Homo sapiens OX=9606 GN=PLEC PE=1 SV=3	Plectin	PLEC	19.91	2316.85	0.7	4382	4401	S1:Phosphorylation (STY):5.55;S3:Phosphorylation (STY):8.22;S4:Phosphorylation (STY):11.06;S10:Phosphorylation (STY):0.00	S4382	NAGGFRSRSSSVG	1963.02	17889.9
Q15149	Q15149|PLEC_HUMAN	S	S(+79.97)RS(+79.97)S(+79.97)SVGSSS(+79.97)SYPISPAVSR	3	20	Plectin OS=Homo sapiens OX=9606 GN=PLEC PE=1 SV=3	Plectin	PLEC	19.91	2316.85	0.7	4382	4401	S1:Phosphorylation (STY):5.55;S3:Phosphorylation (STY):8.22;S4:Phosphorylation (STY):11.06;S10:Phosphorylation (STY):0.00	S4384	GGFRSRSSSVGSS	1963.02	17889.9
Q15149	Q15149|PLEC_HUMAN	S	S(+79.97)RS(+79.97)S(+79.97)SVGSSS(+79.97)SYPISPAVSR	4	20	Plectin OS=Homo sapiens OX=9606 GN=PLEC PE=1 SV=3	Plectin	PLEC	19.91	2316.85	0.7	4382	4401	S1:Phosphorylation (STY):5.55;S3:Phosphorylation (STY):8.22;S4:Phosphorylation (STY):11.06;S10:Phosphorylation (STY):0.00	S4385	GFRSRSSSVGSSS	1963.02	17889.9
Q15149	Q15149|PLEC_HUMAN	S	S(+79.97)RS(+79.97)S(+79.97)SVGSSS(+79.97)SYPISPAVSR	10	20	Plectin OS=Homo sapiens OX=9606 GN=PLEC PE=1 SV=3	Plectin	PLEC	19.91	2316.85	0.7	4382	4401	S1:Phosphorylation (STY):5.55;S3:Phosphorylation (STY):8.22;S4:Phosphorylation (STY):11.06;S10:Phosphorylation (STY):0.00	S4391	SSVGSSSSYPISP	1963.02	17889.9
Q07960	Q07960|RHG01_HUMAN	S	SDDSKS(+79.97)S(+79.97)SPELVTHLK	6	16	Rho GTPase-activating protein 1 OS=Homo sapiens OX=9606 GN=ARHGAP1 PE=1 SV=1	Rho GTPase-activating protein 1	ARHGAP1	46.82	1888.79	-4.7	44	59	S6:Phosphorylation (STY):0.00;S7:Phosphorylation (STY):0.00	S49	KSDDSKSSSPELV	67.405	614.569
Q07960	Q07960|RHG01_HUMAN	S	SDDSKS(+79.97)S(+79.97)SPELVTHLK	7	16	Rho GTPase-activating protein 1 OS=Homo sapiens OX=9606 GN=ARHGAP1 PE=1 SV=1	Rho GTPase-activating protein 1	ARHGAP1	46.82	1888.79	-4.7	44	59	S6:Phosphorylation (STY):0.00;S7:Phosphorylation (STY):0.00	S50	SDDSKSSSPELVT	67.405	614.569
P54821	P54821|PRRX1_HUMAN	S	SLLESPGLTS(+79.97)GSDTPQQDNDQLNSEEKK	10	28	Paired mesoderm homeobox protein 1 OS=Homo sapiens OX=9606 GN=PRRX1 PE=1 SV=2	Paired mesoderm homeobox protein 1	PRRX1	48.79	3096.38	4.1	63	90	S10:Phosphorylation (STY):0.00	S72	ESPGLTSGSDTPQ	199.76	1822.37
Q7LBC6	Q7LBC6|KDM3B_HUMAN	S	S(+79.97)SSPTSSLTQPIEMPTLSSS(+79.97)PTEERPTVGPGQQDNPLLK	1	39	Lysine-specific demethylase 3B OS=Homo sapiens OX=9606 GN=KDM3B PE=1 SV=2	Lysine-specific demethylase 3B	KDM3B	58.29	4252.95	5.7	725	763	S1:Phosphorylation (STY):0.00;S20:Phosphorylation (STY):9.40	S725	AMGNGRSSSPTSS	2587.55	23621
Q7LBC6	Q7LBC6|KDM3B_HUMAN	S	S(+79.97)SSPTSSLTQPIEMPTLSSS(+79.97)PTEERPTVGPGQQDNPLLK	20	39	Lysine-specific demethylase 3B OS=Homo sapiens OX=9606 GN=KDM3B PE=1 SV=2	Lysine-specific demethylase 3B	KDM3B	58.29	4252.95	5.7	725	763	S1:Phosphorylation (STY):0.00;S20:Phosphorylation (STY):9.40	S744	MPTLSSSPTEERP	2587.55	23621
Q8IV63	Q8IV63|VRK3_HUMAN	S	LSLFSDGDSS(+79.97)ESEDTLSSSER	10	21	Inactive serine/threonine-protein kinase VRK3 OS=Homo sapiens OX=9606 GN=VRK3 PE=1 SV=2	Inactive serine/threonine-protein kinase VRK3	VRK3	48.98	2326.93	2.7	74	94	S10:Phosphorylation (STY):0.00	S83	FSDGDSSESEDTL	198.1	1811.08
Q9P258	Q9P258|RCC2_HUMAN	S	C(+57.02)SSSS(+79.97)GGGSS(+79.97)GDEDGLELDGAPGGGK	5	26	Protein RCC2 OS=Homo sapiens OX=9606 GN=RCC2 PE=1 SV=2	Protein RCC2	RCC2	52.46	2498.88	-1.7	42	67	C1:Carbamidomethylation:1000.00;S5:Phosphorylation (STY):0.00;S10:Phosphorylation (STY):0.00	S46	ERCSSSSGGGSSG	953.12	8716.61
Q9P258	Q9P258|RCC2_HUMAN	S	C(+57.02)SSSS(+79.97)GGGSS(+79.97)GDEDGLELDGAPGGGK	10	26	Protein RCC2 OS=Homo sapiens OX=9606 GN=RCC2 PE=1 SV=2	Protein RCC2	RCC2	52.46	2498.88	-1.7	42	67	C1:Carbamidomethylation:1000.00;S5:Phosphorylation (STY):0.00;S10:Phosphorylation (STY):0.00	S51	SSGGGSSGDEDGL	953.12	8716.61
P55081	P55081|MFAP1_HUMAN	S	IS(+79.97)EDVEER	2	8	Microfibrillar-associated protein 1 OS=Homo sapiens OX=9606 GN=MFAP1 PE=1 SV=2	Microfibrillar-associated protein 1	MFAP1	33.7	1055.42	-4.5	93	100		S94	RLQNRISEDVEER	128.986	1179.89
Q8WUY3	Q8WUY3|PRUN2_HUMAN	T	QSLAPYT(+79.97)PPFDLSYLTEPAQSAETIEEAGSPEDESLGC(+57.02)R	7	39	Protein prune homolog 2 OS=Homo sapiens OX=9606 GN=PRUNE2 PE=1 SV=3	Protein prune homolog 2	PRUNE2	64.31	4334.91	8	2387	2425	T7:Phosphorylation (STY):4.12;C38:Carbamidomethylation:1000.00	T2393	QSLAPYTPPFDLS	451.393	4136.88
P52948	P52948|NUP98_HUMAN	S	AASLMNIPSTSSWSVPPPLTSVFTMPS(+79.97)PAPEVPLK	27	35	Nuclear pore complex protein Nup98-Nup96 OS=Homo sapiens OX=9606 GN=NUP98 PE=1 SV=4	Nuclear pore complex protein Nup98-Nup96	NUP98	49.14	3715.83	0	1073	1107	S27:Phosphorylation (STY):28.36	S1099	SVFTMPSPAPEVP	122.697	1125.31
Q8TCU6	Q8TCU6|PREX1_HUMAN	S	S(+79.97)INGSLYIFR	1	10	Phosphatidylinositol 3,4,5-trisphosphate-dependent Rac exchanger 1 protein OS=Homo sapiens OX=9606 GN=PREX1 PE=1 SV=3	Phosphatidylinositol 3,4,5-trisphosphate-dependent Rac exchanger 1 protein	PREX1	57.75	1248.59	-4.9	319	328	S1:Phosphorylation (STY):46.21	S319	STKRTKSINGSLY	114.543	1052.01
Q9BVC5	Q9BVC5|ASHWN_HUMAN	S	KLSNS(+79.97)SSSVSPLILSSNLPVNNK	5	23	Ashwin OS=Homo sapiens OX=9606 GN=C2orf49 PE=1 SV=1	Ashwin	C2orf49	62.89	2464.26	-4.3	141	163	S5:Phosphorylation (STY):0.00	S145	FRKLSNSSSSVSP	32.8379	301.737
P46821	P46821|MAP1B_HUMAN	S	KLGDVSPTQIDVSQFGS(+79.97)FKEDTK	17	23	Microtubule-associated protein 1B OS=Homo sapiens OX=9606 GN=MAP1B PE=1 SV=2	Microtubule-associated protein 1B	MAP1B	52.76	2605.23	3.2	1496	1518	S17:Phosphorylation (STY):0.00	S1512	DVSQFGSFKEDTK	248.201	2282.94
O94763	O94763|RMP_HUMAN	S	SISC(+57.02)EEATC(+57.02)S(+79.97)DTSESILEEEPQENQK	10	26	Unconventional prefoldin RPB5 interactor 1 OS=Homo sapiens OX=9606 GN=URI1 PE=1 SV=3	Unconventional prefoldin RPB5 interactor 1	URI1	34.16	3079.22	0.3	440	465	C4:Carbamidomethylation:1000.00;C9:Carbamidomethylation:1000.00;S10:Phosphorylation (STY):0.00	S449	CEEATCSDTSESI	25.3747	234.032
P52272	P52272|HNRPM_HUMAN	S	QGGGGGGGS(+79.97)VPGIER	9	15	Heterogeneous nuclear ribonucleoprotein M OS=Homo sapiens OX=9606 GN=HNRNPM PE=1 SV=3	Heterogeneous nuclear ribonucleoprotein M	HNRNPM	53.25	1363.59	1.1	389	403		S397	GGGGGGSVPGIER	71.8608	662.783
Q16891	Q16891|MIC60_HUMAN	S	TDHPEIGEGKPTPALS(+79.97)EEASSSSIR	16	25	MICOS complex subunit MIC60 OS=Homo sapiens OX=9606 GN=IMMT PE=1 SV=1	MICOS complex subunit MIC60	IMMT	29.83	2674.21	-3.9	171	195	S16:Phosphorylation (STY):4.73	S186	KPTPALSEEASSS	158.633	1463.59
Q14151	Q14151|SAFB2_HUMAN:Q15424|SAFB1_HUMAN	S	S(+79.97)EPVKEESSELEQPFAQDTSSVGPDR	1	26	Scaffold attachment factor B2 OS=Homo sapiens OX=9606 GN=SAFB2 PE=1 SV=1	Scaffold attachment factor B2	SAFB2	72.14	2927.27	-4.6	226	251	S1:Phosphorylation (STY):20.85	S226	LGETCKSEPVKEE	213.236	1967.96
Q8N2M8	Q8N2M8|CLASR_HUMAN	S	SRS(+79.97)PT(+79.97)PGREEK	3	11	CLK4-associating serine/arginine rich protein OS=Homo sapiens OX=9606 GN=CLASRP PE=1 SV=4	CLK4-associating serine/arginine rich protein	CLASRP	29.17	1402.56	-0.6	315	325	S3:Phosphorylation (STY):9.40;T5:Phosphorylation (STY):28.70	S317	SRSRSRSPTPGRE	77.0886	711.646
Q8N2M8	Q8N2M8|CLASR_HUMAN	T	SRS(+79.97)PT(+79.97)PGREEK	5	11	CLK4-associating serine/arginine rich protein OS=Homo sapiens OX=9606 GN=CLASRP PE=1 SV=4	CLK4-associating serine/arginine rich protein	CLASRP	29.17	1402.56	-0.6	315	325	S3:Phosphorylation (STY):9.40;T5:Phosphorylation (STY):28.70	T319	SRSRSPTPGREEK	77.0886	711.646
O94979	O94979|SC31A_HUMAN	S	DSDQVAQS(+79.97)DGEESPAAEEQLLGEHIK	8	26	Protein transport protein Sec31A OS=Homo sapiens OX=9606 GN=SEC31A PE=1 SV=3	Protein transport protein Sec31A	SEC31A	94.13	2861.22	-1.7	520	545	S8:Phosphorylation (STY):52.68	S527	SDQVAQSDGEESP	10830.9	99996.7
Q9H4A3	Q9H4A3|WNK1_HUMAN	S	DRPVSQPSLVGS(+79.97)K	12	13	Serine/threonine-protein kinase WNK1 OS=Homo sapiens OX=9606 GN=WNK1 PE=1 SV=2	Serine/threonine-protein kinase WNK1	WNK1	44.25	1448.7	-4	163	175	S12:Phosphorylation (STY):0.00	S174	QPSLVGSKEEPPP	74.8441	693.312
Q01484	Q01484|ANK2_HUMAN:Q14669|TRIPC_HUMAN	S	AMIVPSSPS(+79.97)KT(+79.97)PEEVSTPAEEEK	9	23	Ankyrin-2 OS=Homo sapiens OX=9606 GN=ANK2 PE=1 SV=4	Ankyrin-2	ANK2	53.33	2602.12	-1.1	3787	3809	S9:Phosphorylation (STY):0.00;T11:Phosphorylation (STY):0.00	S3795	IVPSSPSKTPEEV	336.51	3119.01
Q01484	Q01484|ANK2_HUMAN:Q14669|TRIPC_HUMAN	T	AMIVPSSPS(+79.97)KT(+79.97)PEEVSTPAEEEK	11	23	Ankyrin-2 OS=Homo sapiens OX=9606 GN=ANK2 PE=1 SV=4	Ankyrin-2	ANK2	53.33	2602.12	-1.1	3787	3809	S9:Phosphorylation (STY):0.00;T11:Phosphorylation (STY):0.00	T3797	PSSPSKTPEEVST	336.51	3119.01
Q8TER5	Q8TER5|ARH40_HUMAN	S	GGDSAPLS(+79.97)PGDKEDASHQEALGNLPSPSEHKLPEC(+57.02)HLVK	8	39	Rho guanine nucleotide exchange factor 40 OS=Homo sapiens OX=9606 GN=ARHGEF40 PE=1 SV=3	Rho guanine nucleotide exchange factor 40	ARHGEF40	19.92	4182.93	0.3	394	432	S8:Phosphorylation (STY):0.00;C35:Carbamidomethylation:1000.00	S401	GDSAPLSPGDKED	188.086	1743.58
O60271	O60271|JIP4_HUMAN	S	RSS(+79.97)TLSQLPGDK	3	12	C-Jun-amino-terminal kinase-interacting protein 4 OS=Homo sapiens OX=9606 GN=SPAG9 PE=1 SV=4	C-Jun-amino-terminal kinase-interacting protein 4	SPAG9	51.87	1367.64	-2.8	592	603	S3:Phosphorylation (STY):10.11	S594	SVKKRSSTLSQLP	139.047	1289.07
P47974	P47974|TISD_HUMAN	S	LS(+79.97)DSPVFDAPPS(+79.97)PPDSLS(+79.97)DR	2	20	mRNA decay activator protein ZFP36L2 OS=Homo sapiens OX=9606 GN=ZFP36L2 PE=1 SV=3	mRNA decay activator protein ZFP36L2	ZFP36L2	19.74	2337.88	1.4	437	456	S2:Phosphorylation (STY):0.00;S12:Phosphorylation (STY):11.12;S18:Phosphorylation (STY):11.10	S438	QLPRRLSDSPVFD	59.1257	548.949
P47974	P47974|TISD_HUMAN	S	LS(+79.97)DSPVFDAPPS(+79.97)PPDSLS(+79.97)DR	12	20	mRNA decay activator protein ZFP36L2 OS=Homo sapiens OX=9606 GN=ZFP36L2 PE=1 SV=3	mRNA decay activator protein ZFP36L2	ZFP36L2	19.74	2337.88	1.4	437	456	S2:Phosphorylation (STY):0.00;S12:Phosphorylation (STY):11.12;S18:Phosphorylation (STY):11.10	S448	VFDAPPSPPDSLS	59.1257	548.949
P47974	P47974|TISD_HUMAN	S	LS(+79.97)DSPVFDAPPS(+79.97)PPDSLS(+79.97)DR	18	20	mRNA decay activator protein ZFP36L2 OS=Homo sapiens OX=9606 GN=ZFP36L2 PE=1 SV=3	mRNA decay activator protein ZFP36L2	ZFP36L2	19.74	2337.88	1.4	437	456	S2:Phosphorylation (STY):0.00;S12:Phosphorylation (STY):11.12;S18:Phosphorylation (STY):11.10	S454	SPPDSLSDRDSYL	59.1257	548.949
Q4LE39	Q4LE39|ARI4B_HUMAN	S	DIEVLS(+79.97)EDT(+79.97)DYEEDEVTK	6	18	AT-rich interactive domain-containing protein 4B OS=Homo sapiens OX=9606 GN=ARID4B PE=1 SV=2	AT-rich interactive domain-containing protein 4B	ARID4B	64.4	2287.85	-7.5	785	802	S6:Phosphorylation (STY):41.87;T9:Phosphorylation (STY):14.04	S790	KDIEVLSEDTDYE	116.532	1082.03
Q4LE39	Q4LE39|ARI4B_HUMAN	T	DIEVLS(+79.97)EDT(+79.97)DYEEDEVTK	9	18	AT-rich interactive domain-containing protein 4B OS=Homo sapiens OX=9606 GN=ARID4B PE=1 SV=2	AT-rich interactive domain-containing protein 4B	ARID4B	64.4	2287.85	-7.5	785	802	S6:Phosphorylation (STY):41.87;T9:Phosphorylation (STY):14.04	T793	EVLSEDTDYEEDE	116.532	1082.03
P46821	P46821|MAP1B_HUMAN	S	DVM(+15.99)SDETNNEETESPS(+79.97)QEFVNITK	16	24	Microtubule-associated protein 1B OS=Homo sapiens OX=9606 GN=MAP1B PE=1 SV=2	Microtubule-associated protein 1B	MAP1B	68.41	2838.14	-3.6	1141	1164	M3:Oxidation (M):1000.00;S16:Phosphorylation (STY):13.67	S1156	EETESPSQEFVNI	865.015	8045.75
Q9HAW4	Q9HAW4|CLSPN_HUMAN	S	FTS(+79.97)QDASTPASSELNK	3	16	Claspin OS=Homo sapiens OX=9606 GN=CLSPN PE=1 SV=3	Claspin	CLSPN	45.68	1761.75	1.7	948	963	S3:Phosphorylation (STY):0.00	S950	CSGKFTSQDASTP	49.4003	459.539
Q969E2	Q969E2|SCAM4_HUMAN	T	AQTEWNTGT(+79.97)WR	9	11	Secretory carrier-associated membrane protein 4 OS=Homo sapiens OX=9606 GN=SCAMP4 PE=1 SV=1	Secretory carrier-associated membrane protein 4	SCAMP4	51.55	1428.58	-3.8	186	196	T9:Phosphorylation (STY):18.53	T194	TEWNTGTWRNPPS	91.0637	849.069
Q03989	Q03989|ARI5A_HUMAN	S	NVYDELGGS(+79.97)PGSTSAATC(+57.02)TR	9	20	AT-rich interactive domain-containing protein 5A OS=Homo sapiens OX=9606 GN=ARID5A PE=1 SV=2	AT-rich interactive domain-containing protein 5A	ARID5A	19.68	2121.87	4.4	113	132	S9:Phosphorylation (STY):16.66;C18:Carbamidomethylation:1000.00	S121	YDELGGSPGSTSA	60.4092	563.531
Q99638	Q99638|RAD9A_HUMAN	S	SPQGPSPVLAEDS(+79.97)EGEG	13	17	Cell cycle checkpoint control protein RAD9A OS=Homo sapiens OX=9606 GN=RAD9A PE=1 SV=1	Cell cycle checkpoint control protein RAD9A	RAD9A	62.55	1734.7	1.2	375	391	S13:Phosphorylation (STY):100.91	S387	PVLAEDSEGEG__	873.592	8150.79
Q9NQS7	Q9NQS7|INCE_HUMAN	Y	INPDNY(+79.97)GMDLNSDDS(+79.97)T(+79.97)DDEAHPR	6	23	Inner centromere protein OS=Homo sapiens OX=9606 GN=INCENP PE=1 SV=3	Inner centromere protein	INCENP	29.21	2829.95	-1.7	817	839	Y6:Phosphorylation (STY):2.36;S15:Phosphorylation (STY):9.42;T16:Phosphorylation (STY):8.26	Y822	KINPDNYGMDLNS	711.236	6653
Q9NQS7	Q9NQS7|INCE_HUMAN	S	INPDNY(+79.97)GMDLNSDDS(+79.97)T(+79.97)DDEAHPR	15	23	Inner centromere protein OS=Homo sapiens OX=9606 GN=INCENP PE=1 SV=3	Inner centromere protein	INCENP	29.21	2829.95	-1.7	817	839	Y6:Phosphorylation (STY):2.36;S15:Phosphorylation (STY):9.42;T16:Phosphorylation (STY):8.26	S831	DLNSDDSTDDEAH	711.236	6653
Q9NQS7	Q9NQS7|INCE_HUMAN	T	INPDNY(+79.97)GMDLNSDDS(+79.97)T(+79.97)DDEAHPR	16	23	Inner centromere protein OS=Homo sapiens OX=9606 GN=INCENP PE=1 SV=3	Inner centromere protein	INCENP	29.21	2829.95	-1.7	817	839	Y6:Phosphorylation (STY):2.36;S15:Phosphorylation (STY):9.42;T16:Phosphorylation (STY):8.26	T832	LNSDDSTDDEAHP	711.236	6653
Q9Y3C0	Q9Y3C0|WASC3_HUMAN	S	TVEESSDSESSFS(+79.97)D	13	14	WASH complex subunit 3 OS=Homo sapiens OX=9606 GN=WASHC3 PE=1 SV=1	WASH complex subunit 3	WASHC3	57.44	1584.54	-0.1	181	194	S13:Phosphorylation (STY):41.83	S193	DSESSFSD_____	224.457	2101.13
Q96BD8	Q9Y2W1|TR150_HUMAN:Q96BD8|SKA1_HUMAN	S	ELC(+57.02)ES(+79.97)LEEDYKDIEHLK	5	17	Spindle and kinetochore-associated protein 1 OS=Homo sapiens OX=9606 GN=SKA1 PE=1 SV=1	Spindle and kinetochore-associated protein 1	SKA1	28.81	2228.95	4.8	72	88	C3:Carbamidomethylation:1000.00;S5:Phosphorylation (STY):23.70	S76	LKELCESLEEDYK	186.111	1742.75
P46821	P46821|MAP1B_HUMAN	S	DYNAS(+79.97)ASTISPPSSMEEDKFSR	5	22	Microtubule-associated protein 1B OS=Homo sapiens OX=9606 GN=MAP1B PE=1 SV=2	Microtubule-associated protein 1B	MAP1B	43.74	2498.03	-0.1	1199	1220	S5:Phosphorylation (STY):0.00	S1203	GKDYNASASTISP	7944.83	74551
Q9BX63	Q9BX63|FANCJ_HUMAN	S	ATPELGSSENSASS(+79.97)PPR	14	17	Fanconi anemia group J protein OS=Homo sapiens OX=9606 GN=BRIP1 PE=1 SV=2	Fanconi anemia group J protein	BRIP1	71.19	1765.75	0.6	1019	1035	S14:Phosphorylation (STY):20.92	S1032	SENSASSPPRFKT	979.564	9223.41
Q7Z4V5	Q7Z4V5|HDGR2_HUMAN	S	GS(+79.97)GGS(+79.97)SGDELREDDEPVK	2	18	Hepatoma-derived growth factor-related protein 2 OS=Homo sapiens OX=9606 GN=HDGFL2 PE=1 SV=1	Hepatoma-derived growth factor-related protein 2	HDGFL2	40.19	1992.73	2.8	365	382	S2:Phosphorylation (STY):0.00;S5:Phosphorylation (STY):0.00	S366	GEAERGSGGSSGD	37729.2	355514
Q7Z4V5	Q7Z4V5|HDGR2_HUMAN	S	GS(+79.97)GGS(+79.97)SGDELREDDEPVK	5	18	Hepatoma-derived growth factor-related protein 2 OS=Homo sapiens OX=9606 GN=HDGFL2 PE=1 SV=1	Hepatoma-derived growth factor-related protein 2	HDGFL2	40.19	1992.73	2.8	365	382	S2:Phosphorylation (STY):0.00;S5:Phosphorylation (STY):0.00	S369	ERGSGGSSGDELR	37729.2	355514
Q9UQ35	Q9UQ35|SRRM2_HUMAN	S	AQTPPGPSLSGS(+79.97)KSPC(+57.02)PQEK	12	20	Serine/arginine repetitive matrix protein 2 OS=Homo sapiens OX=9606 GN=SRRM2 PE=1 SV=2	Serine/arginine repetitive matrix protein 2	SRRM2	42.49	2131.96	-4.9	1001	1020	S12:Phosphorylation (STY):0.00;C16:Carbamidomethylation:1000.00	S1012	GPSLSGSKSPCPQ	1864.7	17578.2
Q96JM2	Q96JM2|ZN462_HUMAN	S	SAPS(+79.97)PTSNSTYLTMNAASR	4	19	Zinc finger protein 462 OS=Homo sapiens OX=9606 GN=ZNF462 PE=1 SV=3	Zinc finger protein 462	ZNF462	47.01	2034.87	3.1	292	310	S4:Phosphorylation (STY):12.33	S295	PNKSAPSPTSNST	74.7295	705.041
Q6IN85	Q6IN85|P4R3A_HUMAN	S	TNLTSQSSTTNLPGSPGS(+79.97)PGS(+79.97)PGSPGS(+79.97)PGSVPK	18	33	Serine/threonine-protein phosphatase 4 regulatory subunit 3A OS=Homo sapiens OX=9606 GN=PPP4R3A PE=1 SV=1	Serine/threonine-protein phosphatase 4 regulatory subunit 3A	PPP4R3A	61	3276.36	-2.2	754	786	S18:Phosphorylation (STY):13.30;S21:Phosphorylation (STY):12.16;S27:Phosphorylation (STY):12.33	S771	LPGSPGSPGSPGS	31.7131	299.248
Q6IN85	Q6IN85|P4R3A_HUMAN	S	TNLTSQSSTTNLPGSPGS(+79.97)PGS(+79.97)PGSPGS(+79.97)PGSVPK	21	33	Serine/threonine-protein phosphatase 4 regulatory subunit 3A OS=Homo sapiens OX=9606 GN=PPP4R3A PE=1 SV=1	Serine/threonine-protein phosphatase 4 regulatory subunit 3A	PPP4R3A	61	3276.36	-2.2	754	786	S18:Phosphorylation (STY):13.30;S21:Phosphorylation (STY):12.16;S27:Phosphorylation (STY):12.33	S774	SPGSPGSPGSPGS	31.7131	299.248
Q6IN85	Q6IN85|P4R3A_HUMAN	S	TNLTSQSSTTNLPGSPGS(+79.97)PGS(+79.97)PGSPGS(+79.97)PGSVPK	27	33	Serine/threonine-protein phosphatase 4 regulatory subunit 3A OS=Homo sapiens OX=9606 GN=PPP4R3A PE=1 SV=1	Serine/threonine-protein phosphatase 4 regulatory subunit 3A	PPP4R3A	61	3276.36	-2.2	754	786	S18:Phosphorylation (STY):13.30;S21:Phosphorylation (STY):12.16;S27:Phosphorylation (STY):12.33	S780	SPGSPGSPGSVPK	31.7131	299.248
Q9UBB5	Q9UBB5|MBD2_HUMAN	S	SDVYYFS(+79.97)PSGKK	7	12	Methyl-CpG-binding domain protein 2 OS=Homo sapiens OX=9606 GN=MBD2 PE=1 SV=1	Methyl-CpG-binding domain protein 2	MBD2	30.79	1456.63	14.3	175	186	S7:Phosphorylation (STY):14.04	S181	SDVYYFSPSGKKF	204.794	1933.53
Q8WXI2	Q8WXI2|CNKR2_HUMAN	Y	KGDKSNSPTHY(+79.97)S(+79.97)LLPSLQM(+15.99)DALR	11	23	Connector enhancer of kinase suppressor of ras 2 OS=Homo sapiens OX=9606 GN=CNKSR2 PE=1 SV=1	Connector enhancer of kinase suppressor of ras 2	CNKSR2	24.88	2733.22	4.3	499	521	Y11:Phosphorylation (STY):9.45;S12:Phosphorylation (STY):8.82;M19:Oxidation (M):1000.00	Y509	SNSPTHYSLLPSL	827.203	7824.44
Q8WXI2	Q8WXI2|CNKR2_HUMAN	S	KGDKSNSPTHY(+79.97)S(+79.97)LLPSLQM(+15.99)DALR	12	23	Connector enhancer of kinase suppressor of ras 2 OS=Homo sapiens OX=9606 GN=CNKSR2 PE=1 SV=1	Connector enhancer of kinase suppressor of ras 2	CNKSR2	24.88	2733.22	4.3	499	521	Y11:Phosphorylation (STY):9.45;S12:Phosphorylation (STY):8.82;M19:Oxidation (M):1000.00	S510	NSPTHYSLLPSLQ	827.203	7824.44
Q9UKY7	Q9UKY7|CDV3_HUMAN	S	VQAMQISS(+79.97)EKEEDDNEKR	8	18	Protein CDV3 homolog OS=Homo sapiens OX=9606 GN=CDV3 PE=1 SV=1	Protein CDV3 homolog	CDV3	47.08	2214.95	-2.8	100	117	S8:Phosphorylation (STY):0.00	S107	QAMQISSEKEEDD	62.4316	590.548
O15400	O15400|STX7_HUMAN	S	VS(+79.97)GSFPEDSSK	2	11	Syntaxin-7 OS=Homo sapiens OX=9606 GN=STX7 PE=1 SV=4	Syntaxin-7	STX7	35.38	1218.48	-2.7	128	138	S2:Phosphorylation (STY):36.05	S129	RASSRVSGSFPED	841.112	7971.24
Q9Y5K6	Q9Y5K6|CD2AP_HUMAN	S	S(+79.97)VDFDSLTVR	1	10	CD2-associated protein OS=Homo sapiens OX=9606 GN=CD2AP PE=1 SV=1	CD2-associated protein	CD2AP	58.95	1217.53	-2.8	458	467	S1:Phosphorylation (STY):76.17	S458	LPLRPKSVDFDSL	119.53	1133.02
Q9NYF8	Q9NYF8|BCLF1_HUMAN	T	SQEEPKDT(+79.97)FEHDPSESIDEFNK	8	22	Bcl-2-associated transcription factor 1 OS=Homo sapiens OX=9606 GN=BCLAF1 PE=1 SV=2	Bcl-2-associated transcription factor 1	BCLAF1	24.2	2687.09	-5	183	204	T8:Phosphorylation (STY):0.00	T190	QEEPKDTFEHDPS	50.7929	481.856
O60282	O60282|KIF5C_HUMAN	T	M(+15.99)TRILQDSLGGNC(+57.02)RT(+79.97)T(+79.97)IVIC(+57.02)C(+57.02)SPS(+79.97)VFNEAET(+79.97)K	15	32	Kinesin heavy chain isoform 5C OS=Homo sapiens OX=9606 GN=KIF5C PE=1 SV=1	Kinesin heavy chain isoform 5C	KIF5C	21.22	3992.6	0.6	284	315	M1:Oxidation (M):1000.00;C13:Carbamidomethylation:1000.00;T15:Phosphorylation (STY):0.00;T16:Phosphorylation (STY):0.00;C20:Carbamidomethylation:1000.00;C21:Carbamidomethylation:1000.00;S24:Phosphorylation (STY):4.47;T31:Phosphorylation (STY):25.59	T298	LGGNCRTTIVICC	292.984	2782.82
O60282	O60282|KIF5C_HUMAN	T	M(+15.99)TRILQDSLGGNC(+57.02)RT(+79.97)T(+79.97)IVIC(+57.02)C(+57.02)SPS(+79.97)VFNEAET(+79.97)K	16	32	Kinesin heavy chain isoform 5C OS=Homo sapiens OX=9606 GN=KIF5C PE=1 SV=1	Kinesin heavy chain isoform 5C	KIF5C	21.22	3992.6	0.6	284	315	M1:Oxidation (M):1000.00;C13:Carbamidomethylation:1000.00;T15:Phosphorylation (STY):0.00;T16:Phosphorylation (STY):0.00;C20:Carbamidomethylation:1000.00;C21:Carbamidomethylation:1000.00;S24:Phosphorylation (STY):4.47;T31:Phosphorylation (STY):25.59	T299	GGNCRTTIVICCS	292.984	2782.82
O60282	O60282|KIF5C_HUMAN	S	M(+15.99)TRILQDSLGGNC(+57.02)RT(+79.97)T(+79.97)IVIC(+57.02)C(+57.02)SPS(+79.97)VFNEAET(+79.97)K	24	32	Kinesin heavy chain isoform 5C OS=Homo sapiens OX=9606 GN=KIF5C PE=1 SV=1	Kinesin heavy chain isoform 5C	KIF5C	21.22	3992.6	0.6	284	315	M1:Oxidation (M):1000.00;C13:Carbamidomethylation:1000.00;T15:Phosphorylation (STY):0.00;T16:Phosphorylation (STY):0.00;C20:Carbamidomethylation:1000.00;C21:Carbamidomethylation:1000.00;S24:Phosphorylation (STY):4.47;T31:Phosphorylation (STY):25.59	S307	VICCSPSVFNEAE	292.984	2782.82
O60282	O60282|KIF5C_HUMAN	T	M(+15.99)TRILQDSLGGNC(+57.02)RT(+79.97)T(+79.97)IVIC(+57.02)C(+57.02)SPS(+79.97)VFNEAET(+79.97)K	31	32	Kinesin heavy chain isoform 5C OS=Homo sapiens OX=9606 GN=KIF5C PE=1 SV=1	Kinesin heavy chain isoform 5C	KIF5C	21.22	3992.6	0.6	284	315	M1:Oxidation (M):1000.00;C13:Carbamidomethylation:1000.00;T15:Phosphorylation (STY):0.00;T16:Phosphorylation (STY):0.00;C20:Carbamidomethylation:1000.00;C21:Carbamidomethylation:1000.00;S24:Phosphorylation (STY):4.47;T31:Phosphorylation (STY):25.59	T314	VFNEAETKSTLMF	292.984	2782.82
Q9H6Z4	Q9H6Z4|RANB3_HUMAN	S	M(+15.99)PAPEPGAAPSNEEDDS(+79.97)DDDDVLAPSGATAAGAGDEGDGQTTGST	17	45	Ran-binding protein 3 OS=Homo sapiens OX=9606 GN=RANBP3 PE=1 SV=1	Ran-binding protein 3	RANBP3	61.55	4340.68	0.2	523	567	M1:Oxidation (M):1000.00;S17:Phosphorylation (STY):5.14	S539	SNEEDDSDDDDVL	295.531	2808.43
Q9UJX6	Q9UJX6|ANC2_HUMAN	S	DNMVLIDSDDES(+79.97)DS(+79.97)GMASQADQK	12	23	Anaphase-promoting complex subunit 2 OS=Homo sapiens OX=9606 GN=ANAPC2 PE=1 SV=1	Anaphase-promoting complex subunit 2	ANAPC2	40.99	2629.94	-4.6	725	747	S12:Phosphorylation (STY):0.00;S14:Phosphorylation (STY):0.00	S736	IDSDDESDSGMAS	1458.75	13863.9
Q9UJX6	Q9UJX6|ANC2_HUMAN	S	DNMVLIDSDDES(+79.97)DS(+79.97)GMASQADQK	14	23	Anaphase-promoting complex subunit 2 OS=Homo sapiens OX=9606 GN=ANAPC2 PE=1 SV=1	Anaphase-promoting complex subunit 2	ANAPC2	40.99	2629.94	-4.6	725	747	S12:Phosphorylation (STY):0.00;S14:Phosphorylation (STY):0.00	S738	SDDESDSGMASQA	1458.75	13863.9
Q9UQ35	Q9UQ35|SRRM2_HUMAN	S	AGM(+15.99)SSNQS(+79.97)IS(+79.97)SPVLDAVPR	8	19	Serine/arginine repetitive matrix protein 2 OS=Homo sapiens OX=9606 GN=SRRM2 PE=1 SV=2	Serine/arginine repetitive matrix protein 2	SRRM2	47.18	2090.87	2.7	1394	1412	M3:Oxidation (M):1000.00;S8:Phosphorylation (STY):0.00;S10:Phosphorylation (STY):0.00	S1401	GMSSNQSISSPVL	372.161	3544.15
Q9UQ35	Q9UQ35|SRRM2_HUMAN	S	AGM(+15.99)SSNQS(+79.97)IS(+79.97)SPVLDAVPR	10	19	Serine/arginine repetitive matrix protein 2 OS=Homo sapiens OX=9606 GN=SRRM2 PE=1 SV=2	Serine/arginine repetitive matrix protein 2	SRRM2	47.18	2090.87	2.7	1394	1412	M3:Oxidation (M):1000.00;S8:Phosphorylation (STY):0.00;S10:Phosphorylation (STY):0.00	S1403	SSNQSISSPVLDA	372.161	3544.15
P48730	Q8N1W1|ARG28_HUMAN:P48730|KC1D_HUMAN	S	GAPVNIS(+79.97)SSDLTGR	7	14	Casein kinase I isoform delta OS=Homo sapiens OX=9606 GN=CSNK1D PE=1 SV=2	Casein kinase I isoform delta	CSNK1D	41.33	1452.66	-1.3	376	389	S7:Phosphorylation (STY):8.14	S382	GAPVNISSSDLTG	70.1511	669.27
P10451	P10451|OSTP_HUMAN	S	QNLLAPQNAVSS(+79.97)EETNDFK	12	19	Osteopontin OS=Homo sapiens OX=9606 GN=SPP1 PE=1 SV=1	Osteopontin	SPP1	49.34	2183.97	3.1	52	70	S12:Phosphorylation (STY):14.02	S63	PQNAVSSEETNDF	203.862	1946.65
Q9UQ35	Q9UQ35|SRRM2_HUMAN	S	S(+79.97)S(+79.97)GHS(+79.97)SSELS(+79.97)PDAVEK	1	16	Serine/arginine repetitive matrix protein 2 OS=Homo sapiens OX=9606 GN=SRRM2 PE=1 SV=2	Serine/arginine repetitive matrix protein 2	SRRM2	29.77	1935.6	-2.2	1378	1393	S1:Phosphorylation (STY):0.00;S2:Phosphorylation (STY):0.00;S5:Phosphorylation (STY):0.00;S10:Phosphorylation (STY):11.12	S1378	KEQSTRSSGHSSS	209.202	2002.43
Q9UQ35	Q9UQ35|SRRM2_HUMAN	S	S(+79.97)S(+79.97)GHS(+79.97)SSELS(+79.97)PDAVEK	2	16	Serine/arginine repetitive matrix protein 2 OS=Homo sapiens OX=9606 GN=SRRM2 PE=1 SV=2	Serine/arginine repetitive matrix protein 2	SRRM2	29.77	1935.6	-2.2	1378	1393	S1:Phosphorylation (STY):0.00;S2:Phosphorylation (STY):0.00;S5:Phosphorylation (STY):0.00;S10:Phosphorylation (STY):11.12	S1379	EQSTRSSGHSSSE	209.202	2002.43
Q9UQ35	Q9UQ35|SRRM2_HUMAN	S	S(+79.97)S(+79.97)GHS(+79.97)SSELS(+79.97)PDAVEK	5	16	Serine/arginine repetitive matrix protein 2 OS=Homo sapiens OX=9606 GN=SRRM2 PE=1 SV=2	Serine/arginine repetitive matrix protein 2	SRRM2	29.77	1935.6	-2.2	1378	1393	S1:Phosphorylation (STY):0.00;S2:Phosphorylation (STY):0.00;S5:Phosphorylation (STY):0.00;S10:Phosphorylation (STY):11.12	S1382	TRSSGHSSSELSP	209.202	2002.43
Q9UQ35	Q9UQ35|SRRM2_HUMAN	S	S(+79.97)S(+79.97)GHS(+79.97)SSELS(+79.97)PDAVEK	10	16	Serine/arginine repetitive matrix protein 2 OS=Homo sapiens OX=9606 GN=SRRM2 PE=1 SV=2	Serine/arginine repetitive matrix protein 2	SRRM2	29.77	1935.6	-2.2	1378	1393	S1:Phosphorylation (STY):0.00;S2:Phosphorylation (STY):0.00;S5:Phosphorylation (STY):0.00;S10:Phosphorylation (STY):11.12	S1387	HSSSELSPDAVEK	209.202	2002.43
Q8WXE0	Q8WXE0|CSKI2_HUMAN	S	TLSEPAGPSEPPGPPAPAGPAS(+79.97)DTEEEEPGPEGTPPSR	22	38	Caskin-2 OS=Homo sapiens OX=9606 GN=CASKIN2 PE=1 SV=2	Caskin-2	CASKIN2	66.87	3770.65	4.9	906	943	S22:Phosphorylation (STY):0.00	S927	APAGPASDTEEEE	2356.38	22563.4
P15408	P15408|FOSL2_HUMAN	S	RS(+79.97)SSSGDQSSDSLNSPT(+79.97)LLAL	2	21	Fos-related antigen 2 OS=Homo sapiens OX=9606 GN=FOSL2 PE=1 SV=1	Fos-related antigen 2	FOSL2	22.54	2280.95	2	306	326	S2:Phosphorylation (STY):0.00;T17:Phosphorylation (STY):0.00	S307	SKAHRRSSSSGDQ	208.883	2001.08
P15408	P15408|FOSL2_HUMAN	T	RS(+79.97)SSSGDQSSDSLNSPT(+79.97)LLAL	17	21	Fos-related antigen 2 OS=Homo sapiens OX=9606 GN=FOSL2 PE=1 SV=1	Fos-related antigen 2	FOSL2	22.54	2280.95	2	306	326	S2:Phosphorylation (STY):0.00;T17:Phosphorylation (STY):0.00	T322	DSLNSPTLLAL__	208.883	2001.08
O14974	O14974|MYPT1_HUMAN	S	KTGS(+79.97)YGALAEITASK	4	15	Protein phosphatase 1 regulatory subunit 12A OS=Homo sapiens OX=9606 GN=PPP1R12A PE=1 SV=1	Protein phosphatase 1 regulatory subunit 12A	PPP1R12A	26.1	1575.75	2.1	442	456	S4:Phosphorylation (STY):0.00	S445	GLRKTGSYGALAE	452.041	4356.06
Q9H4I2	Q9H7F0|AT133_HUMAN:Q9H4I2|ZHX3_HUMAN	S	QS(+79.97)WHQTPDFTPTK	2	13	Zinc fingers and homeoboxes protein 3 OS=Homo sapiens OX=9606 GN=ZHX3 PE=1 SV=3	Zinc fingers and homeoboxes protein 3	ZHX3	42.52	1651.7	-5.3	603	615	S2:Phosphorylation (STY):18.75	S604	PSAKRQSWHQTPD	410.58	3965.59
P52272	P52272|HNRPM_HUMAN	S	GNFGGS(+79.97)FAGSFGGAGGHAPGVAR	6	23	Heterogeneous nuclear ribonucleoprotein M OS=Homo sapiens OX=9606 GN=HNRNPM PE=1 SV=3	Heterogeneous nuclear ribonucleoprotein M	HNRNPM	42.24	2113.91	-6.3	628	650	S6:Phosphorylation (STY):25.70	S633	RGNFGGSFAGSFG	63.6318	616.463
Q96ST2	Q96ST2|IWS1_HUMAN	S	IS(+79.97)DS(+79.97)ES(+79.97)EDPPR	2	11	Protein IWS1 homolog OS=Homo sapiens OX=9606 GN=IWS1 PE=1 SV=2	Protein IWS1 homolog	IWS1	47.54	1470.44	-2.9	247	257		S248	LPKPRISDSESED	575.327	5574.21
Q96ST2	Q96ST2|IWS1_HUMAN	S	IS(+79.97)DS(+79.97)ES(+79.97)EDPPR	4	11	Protein IWS1 homolog OS=Homo sapiens OX=9606 GN=IWS1 PE=1 SV=2	Protein IWS1 homolog	IWS1	47.54	1470.44	-2.9	247	257		S250	KPRISDSESEDPP	575.327	5574.21
Q96ST2	Q96ST2|IWS1_HUMAN	S	IS(+79.97)DS(+79.97)ES(+79.97)EDPPR	6	11	Protein IWS1 homolog OS=Homo sapiens OX=9606 GN=IWS1 PE=1 SV=2	Protein IWS1 homolog	IWS1	47.54	1470.44	-2.9	247	257		S252	RISDSESEDPPRH	575.327	5574.21
Q8TCS8	Q8TCS8|PNPT1_HUMAN	S	SSIVMGEPISQSSSNS(+79.97)Q	16	17	Polyribonucleotide nucleotidyltransferase 1, mitochondrial OS=Homo sapiens OX=9606 GN=PNPT1 PE=1 SV=2	Polyribonucleotide nucleotidyltransferase 1, mitochondrial	PNPT1	44.94	1816.76	2.9	767	783	S16:Phosphorylation (STY):5.99	S782	SQSSSNSQ_____	69.7068	675.76
Q9UQ35	Q9UQ35|SRRM2_HUMAN:P28715|ERCC5_HUMAN	S	S(+79.97)RS(+79.97)PQRPGWS(+79.97)R	1	11	Serine/arginine repetitive matrix protein 2 OS=Homo sapiens OX=9606 GN=SRRM2 PE=1 SV=2	Serine/arginine repetitive matrix protein 2	SRRM2	31.55	1552.57	-1.9	534	544		S534	PQRRGRSRSPQRP	483.851	4694.93
Q9UQ35	Q9UQ35|SRRM2_HUMAN:P28715|ERCC5_HUMAN	S	S(+79.97)RS(+79.97)PQRPGWS(+79.97)R	3	11	Serine/arginine repetitive matrix protein 2 OS=Homo sapiens OX=9606 GN=SRRM2 PE=1 SV=2	Serine/arginine repetitive matrix protein 2	SRRM2	31.55	1552.57	-1.9	534	544		S536	RRGRSRSPQRPGW	483.851	4694.93
Q9UQ35	Q9UQ35|SRRM2_HUMAN:P28715|ERCC5_HUMAN	S	S(+79.97)RS(+79.97)PQRPGWS(+79.97)R	10	11	Serine/arginine repetitive matrix protein 2 OS=Homo sapiens OX=9606 GN=SRRM2 PE=1 SV=2	Serine/arginine repetitive matrix protein 2	SRRM2	31.55	1552.57	-1.9	534	544		S543	PQRPGWSRSRNTQ	483.851	4694.93
O43426	O43426|SYNJ1_HUMAN	T	AQLSVQT(+79.97)SPVPTPDPK	7	16	Synaptojanin-1 OS=Homo sapiens OX=9606 GN=SYNJ1 PE=1 SV=2	Synaptojanin-1	SYNJ1	53.36	1743.84	3.2	1338	1353	T7:Phosphorylation (STY):8.14	T1344	AQLSVQTSPVPTP	1001.07	9738.69
P49354	P49354|FNTA_HUMAN	S	EEMAAEAGEAVASPM(+15.99)DDGFVS(+79.97)LDSPSYVLYR	21	31	Protein farnesyltransferase/geranylgeranyltransferase type-1 subunit alpha OS=Homo sapiens OX=9606 GN=FNTA PE=1 SV=1	Protein farnesyltransferase/geranylgeranyltransferase type-1 subunit alpha	FNTA	41.07	3401.44	13.2	37	67	M15:Oxidation (M):14.81;S21:Phosphorylation (STY):9.42	S57	MDDGFVSLDSPSY	602.097	5860.37
Q8N344	Q8N344|MIER2_HUMAN	S	DLLS(+79.97)GEEEEETQSSADDLTPSVTSHEASDLFPNR	4	34	Mesoderm induction early response protein 2 OS=Homo sapiens OX=9606 GN=MIER2 PE=1 SV=2	Mesoderm induction early response protein 2	MIER2	32.89	3784.61	3.4	129	162	S4:Phosphorylation (STY):15.08	S132	IAKDLLSGEEEEE	363.747	3550.51
Q15361	Q15361|TTF1_HUMAN	S	NSESTLFDS(+79.97)VEGDGAMMEEGVK	9	22	Transcription termination factor 1 OS=Homo sapiens OX=9606 GN=TTF1 PE=1 SV=3	Transcription termination factor 1	TTF1	40.61	2410.95	3.4	413	434	S9:Phosphorylation (STY):14.19	S421	ESTLFDSVEGDGA	65.7669	642.059
Q96L73	Q96L73|NSD1_HUMAN:Q5U4P2|ASPH1_HUMAN	S	VRDLAGS(+79.97)GT(+79.97)K	7	10	Histone-lysine N-methyltransferase, H3 lysine-36 specific OS=Homo sapiens OX=9606 GN=NSD1 PE=1 SV=1	Histone-lysine N-methyltransferase, H3 lysine-36 specific	NSD1	21.72	1162.48	-15.9	2296	2305		S2302	VRDLAGSGTKSQS	126.396	1234.64
Q96L73	Q96L73|NSD1_HUMAN:Q5U4P2|ASPH1_HUMAN	T	VRDLAGS(+79.97)GT(+79.97)K	9	10	Histone-lysine N-methyltransferase, H3 lysine-36 specific OS=Homo sapiens OX=9606 GN=NSD1 PE=1 SV=1	Histone-lysine N-methyltransferase, H3 lysine-36 specific	NSD1	21.72	1162.48	-15.9	2296	2305		T2304	DLAGSGTKSQSLV	126.396	1234.64
Q9UN70	Q9UN70|PCDGK_HUMAN	S	GGLMS(+79.97)PHLYHQVYLTTDSR	5	19	Protocadherin gamma-C3 OS=Homo sapiens OX=9606 GN=PCDHGC3 PE=1 SV=1	Protocadherin gamma-C3	PCDHGC3	29.08	2254.02	-5.8	749	767	S5:Phosphorylation (STY):11.12	S753	VRGGLMSPHLYHQ	64.6843	632.39
Q01970	Q01970|PLCB3_HUMAN	T	RPPGPT(+79.97)TSPASTSLSSPGQR	6	20	1-phosphatidylinositol 4,5-bisphosphate phosphodiesterase beta-3 OS=Homo sapiens OX=9606 GN=PLCB3 PE=1 SV=2	1-phosphatidylinositol 4,5-bisphosphate phosphodiesterase beta-3	PLCB3	51.45	2059.97	-10	919	938	T6:Phosphorylation (STY):0.00	T924	RRPPGPTTSPAST	46.7509	457.292
Q01970	Q01970|PLCB3_HUMAN	S	RPPGPTTS(+79.97)PASTSLSSPGQR	8	20	1-phosphatidylinositol 4,5-bisphosphate phosphodiesterase beta-3 OS=Homo sapiens OX=9606 GN=PLCB3 PE=1 SV=2	1-phosphatidylinositol 4,5-bisphosphate phosphodiesterase beta-3	PLCB3	55.55	2059.97	-6.3	919	938	S8:Phosphorylation (STY):0.00	S926	PPGPTTSPASTSL	46.7509	457.292
P46013	P46013|KI67_HUMAN	T	AQPLEDLAGFTELSETSGHTQESLT(+79.97)AGK	25	28	Proliferation marker protein Ki-67 OS=Homo sapiens OX=9606 GN=MKI67 PE=1 SV=2	Proliferation marker protein Ki-67	MKI67	50.45	2996.37	-1.5	2673	2700	T25:Phosphorylation (STY):0.00	T2697	HTQESLTAGKATK	581.293	5689.89
O75385	O75385|ULK1_HUMAN	S	NLQS(+79.97)PTQFQTPR	4	12	Serine/threonine-protein kinase ULK1 OS=Homo sapiens OX=9606 GN=ULK1 PE=1 SV=2	Serine/threonine-protein kinase ULK1	ULK1	48.62	1495.68	-1	447	458	S4:Phosphorylation (STY):18.53	S450	IERNLQSPTQFQT	531.474	5203.3
P78559	P78559|MAP1A_HUMAN	T	TEATQGLDYVPSAGTISPT(+79.97)SS(+79.97)LEEDK	19	26	Microtubule-associated protein 1A OS=Homo sapiens OX=9606 GN=MAP1A PE=1 SV=6	Microtubule-associated protein 1A	MAP1A	49.94	2855.2	-1.9	880	905	T19:Phosphorylation (STY):0.00;S21:Phosphorylation (STY):6.65	T898	AGTISPTSSLEED	1383.2	13543.6
P78559	P78559|MAP1A_HUMAN	S	TEATQGLDYVPSAGTISPT(+79.97)SS(+79.97)LEEDK	21	26	Microtubule-associated protein 1A OS=Homo sapiens OX=9606 GN=MAP1A PE=1 SV=6	Microtubule-associated protein 1A	MAP1A	49.94	2855.2	-1.9	880	905	T19:Phosphorylation (STY):0.00;S21:Phosphorylation (STY):6.65	S900	TISPTSSLEEDKG	1383.2	13543.6
Q13425	Q13425|SNTB2_HUMAN	S	KPSLVSDLPWEGAAPQSPSFSGS(+79.97)EDSGS(+79.97)PK	23	30	Beta-2-syntrophin OS=Homo sapiens OX=9606 GN=SNTB2 PE=1 SV=1	Beta-2-syntrophin	SNTB2	35.62	3203.37	-0.7	206	235	S23:Phosphorylation (STY):0.00;S28:Phosphorylation (STY):9.40	S228	SPSFSGSEDSGSP	1560.51	15311.3
Q13425	Q13425|SNTB2_HUMAN	S	KPSLVSDLPWEGAAPQSPSFSGS(+79.97)EDSGS(+79.97)PK	28	30	Beta-2-syntrophin OS=Homo sapiens OX=9606 GN=SNTB2 PE=1 SV=1	Beta-2-syntrophin	SNTB2	35.62	3203.37	-0.7	206	235	S23:Phosphorylation (STY):0.00;S28:Phosphorylation (STY):9.40	S233	GSEDSGSPKHQNS	1560.51	15311.3
Q15185	Q15185|TEBP_HUMAN	S	FSEM(+15.99)MNNM(+15.99)GGDEDVDLPEVDGADDDS(+79.97)QDS(+79.97)DDEKMPDLE	26	38	Prostaglandin E synthase 3 OS=Homo sapiens OX=9606 GN=PTGES3 PE=1 SV=1	Prostaglandin E synthase 3	PTGES3	62.98	4397.52	-2	123	160	M4:Oxidation (M):0.00;M8:Oxidation (M):9.42;S26:Phosphorylation (STY):32.11;S29:Phosphorylation (STY):29.61	S148	DGADDDSQDSDDE	92.6203	909.97
Q15185	Q15185|TEBP_HUMAN	S	FSEM(+15.99)MNNM(+15.99)GGDEDVDLPEVDGADDDS(+79.97)QDS(+79.97)DDEKMPDLE	29	38	Prostaglandin E synthase 3 OS=Homo sapiens OX=9606 GN=PTGES3 PE=1 SV=1	Prostaglandin E synthase 3	PTGES3	62.98	4397.52	-2	123	160	M4:Oxidation (M):0.00;M8:Oxidation (M):9.42;S26:Phosphorylation (STY):32.11;S29:Phosphorylation (STY):29.61	S151	DDDSQDSDDEKMP	92.6203	909.97
P31749	P31749|AKT1_HUMAN	S	S(+79.97)GSPS(+79.97)DNS(+79.97)GAEEMEVSLAKPK	1	21	RAC-alpha serine/threonine-protein kinase OS=Homo sapiens OX=9606 GN=AKT1 PE=1 SV=2	RAC-alpha serine/threonine-protein kinase	AKT1	24.47	2358.87	0.1	122	142	S1:Phosphorylation (STY):0.00;S5:Phosphorylation (STY):0.00;S8:Phosphorylation (STY):3.19	S122	EEMDFRSGSPSDN	299.189	2940.96
P31749	P31749|AKT1_HUMAN	S	S(+79.97)GSPS(+79.97)DNS(+79.97)GAEEMEVSLAKPK	5	21	RAC-alpha serine/threonine-protein kinase OS=Homo sapiens OX=9606 GN=AKT1 PE=1 SV=2	RAC-alpha serine/threonine-protein kinase	AKT1	24.47	2358.87	0.1	122	142	S1:Phosphorylation (STY):0.00;S5:Phosphorylation (STY):0.00;S8:Phosphorylation (STY):3.19	S126	FRSGSPSDNSGAE	299.189	2940.96
P31749	P31749|AKT1_HUMAN	S	S(+79.97)GSPS(+79.97)DNS(+79.97)GAEEMEVSLAKPK	8	21	RAC-alpha serine/threonine-protein kinase OS=Homo sapiens OX=9606 GN=AKT1 PE=1 SV=2	RAC-alpha serine/threonine-protein kinase	AKT1	24.47	2358.87	0.1	122	142	S1:Phosphorylation (STY):0.00;S5:Phosphorylation (STY):0.00;S8:Phosphorylation (STY):3.19	S129	GSPSDNSGAEEME	299.189	2940.96
Q14980	Q14980|NUMA1_HUMAN	S	TQPDGTSVPGEPASPIS(+79.97)QR	17	19	Nuclear mitotic apparatus protein 1 OS=Homo sapiens OX=9606 GN=NUMA1 PE=1 SV=2	Nuclear mitotic apparatus protein 1	NUMA1	50.39	2002.9	2.9	1744	1762	S17:Phosphorylation (STY):3.29	S1760	EPASPISQRLPPK	380.801	3744.53
Q13428	Q13428|TCOF_HUMAN	S	VSDPIS(+79.97)TSES(+79.97)S(+79.97)EEEEEAEAETAK	6	23	Treacle protein OS=Homo sapiens OX=9606 GN=TCOF1 PE=1 SV=3	Treacle protein	TCOF1	40.64	2692.94	-0.1	78	100	S6:Phosphorylation (STY):6.65;S10:Phosphorylation (STY):0.00;S11:Phosphorylation (STY):5.77	S83	RVSDPISTSESSE	1060.31	10443.5
Q13428	Q13428|TCOF_HUMAN	S	VSDPIS(+79.97)TSES(+79.97)S(+79.97)EEEEEAEAETAK	10	23	Treacle protein OS=Homo sapiens OX=9606 GN=TCOF1 PE=1 SV=3	Treacle protein	TCOF1	40.64	2692.94	-0.1	78	100	S6:Phosphorylation (STY):6.65;S10:Phosphorylation (STY):0.00;S11:Phosphorylation (STY):5.77	S87	PISTSESSEEEEE	1060.31	10443.5
Q13428	Q13428|TCOF_HUMAN	S	VSDPIS(+79.97)TSES(+79.97)S(+79.97)EEEEEAEAETAK	11	23	Treacle protein OS=Homo sapiens OX=9606 GN=TCOF1 PE=1 SV=3	Treacle protein	TCOF1	40.64	2692.94	-0.1	78	100	S6:Phosphorylation (STY):6.65;S10:Phosphorylation (STY):0.00;S11:Phosphorylation (STY):5.77	S88	ISTSESSEEEEEA	1060.31	10443.5
Q5THJ4	Q5THJ4|VP13D_HUMAN	S	DYPLTPPPS(+79.97)PTVDEPK	9	16	Intermembrane lipid transfer protein VPS13D OS=Homo sapiens OX=9606 GN=VPS13D PE=1 SV=2	Intermembrane lipid transfer protein VPS13D	VPS13D	33.01	1831.83	-7.6	1757	1772	S9:Phosphorylation (STY):9.40	S1765	PLTPPPSPTVDEP	92.829	914.938
P35269	P35269|T2FA_HUMAN	S	DSSEESDS(+79.97)S(+79.97)EESDIDSEASSALFMAK	8	26	General transcription factor IIF subunit 1 OS=Homo sapiens OX=9606 GN=GTF2F1 PE=1 SV=2	General transcription factor IIF subunit 1	GTF2F1	53.52	2912.04	-2.4	340	365	S8:Phosphorylation (STY):9.40;S9:Phosphorylation (STY):7.77	S347	SSEESDSSEESDI	107.335	1058.32
P35269	P35269|T2FA_HUMAN	S	DSSEESDS(+79.97)S(+79.97)EESDIDSEASSALFMAK	9	26	General transcription factor IIF subunit 1 OS=Homo sapiens OX=9606 GN=GTF2F1 PE=1 SV=2	General transcription factor IIF subunit 1	GTF2F1	53.52	2912.04	-2.4	340	365	S8:Phosphorylation (STY):9.40;S9:Phosphorylation (STY):7.77	S348	SEESDSSEESDID	107.335	1058.32
Q8IXK0	Q8IXK0|PHC2_HUMAN	S	C(+57.02)SDNS(+79.97)S(+79.97)YEEPLSPISASSSTSR	5	22	Polyhomeotic-like protein 2 OS=Homo sapiens OX=9606 GN=PHC2 PE=1 SV=1	Polyhomeotic-like protein 2	PHC2	50.31	2519.94	0.7	740	761	C1:Carbamidomethylation:1000.00;S5:Phosphorylation (STY):0.00;S6:Phosphorylation (STY):0.00	S744	SRCSDNSSYEEPL	77.7806	767.245
Q8IXK0	Q8IXK0|PHC2_HUMAN	S	C(+57.02)SDNS(+79.97)S(+79.97)YEEPLSPISASSSTSR	6	22	Polyhomeotic-like protein 2 OS=Homo sapiens OX=9606 GN=PHC2 PE=1 SV=1	Polyhomeotic-like protein 2	PHC2	50.31	2519.94	0.7	740	761	C1:Carbamidomethylation:1000.00;S5:Phosphorylation (STY):0.00;S6:Phosphorylation (STY):0.00	S745	RCSDNSSYEEPLS	77.7806	767.245
P06748	P06748|NPM_HUMAN	Y	DELHIVEAEAMNY(+79.97)EGSPIKVTLATLK	13	26	Nucleophosmin OS=Homo sapiens OX=9606 GN=NPM1 PE=1 SV=2	Nucleophosmin	NPM1	59.84	2950.44	-0.7	55	80	Y13:Phosphorylation (STY):3.64	Y67	EAEAMNYEGSPIK	2564.33	25308.7
Q14966	Q14966|ZN638_HUMAN	S	ATC(+57.02)DS(+79.97)DFAVETLELETQGEEVK	5	22	Zinc finger protein 638 OS=Homo sapiens OX=9606 GN=ZNF638 PE=1 SV=2	Zinc finger protein 638	ZNF638	54.71	2550.07	7	1154	1175	C3:Carbamidomethylation:1000.00;S5:Phosphorylation (STY):5.77	S1158	EKATCDSDFAVET	98.5363	973.21
Q15149	Q15149|PLEC_HUMAN	S	GYYS(+79.97)PYSVSGSGST(+79.97)AGSR	4	18	Plectin OS=Homo sapiens OX=9606 GN=PLEC PE=1 SV=3	Plectin	PLEC	58.1	1941.72	0.2	4610	4627	S4:Phosphorylation (STY):12.28;T14:Phosphorylation (STY):12.28	S4613	STKGYYSPYSVSG	285.021	2816.89
Q15149	Q15149|PLEC_HUMAN	T	GYYS(+79.97)PYSVSGSGST(+79.97)AGSR	14	18	Plectin OS=Homo sapiens OX=9606 GN=PLEC PE=1 SV=3	Plectin	PLEC	58.1	1941.72	0.2	4610	4627	S4:Phosphorylation (STY):12.28;T14:Phosphorylation (STY):12.28	T4623	VSGSGSTAGSRTG	285.021	2816.89
Q9UQ35	Q9UQ35|SRRM2_HUMAN	T	QGSIT(+79.97)SPQANEQSVTPQR	5	18	Serine/arginine repetitive matrix protein 2 OS=Homo sapiens OX=9606 GN=SRRM2 PE=1 SV=2	Serine/arginine repetitive matrix protein 2	SRRM2	49.74	2006.91	-9.2	852	869	T5:Phosphorylation (STY):0.00	T856	PRQGSITSPQANE	232.734	2301.87
O75494	O75494|SRS10_HUMAN	S	S(+79.97)RSFDYNYR	1	9	Serine/arginine-rich splicing factor 10 OS=Homo sapiens OX=9606 GN=SRSF10 PE=1 SV=1	Serine/arginine-rich splicing factor 10	SRSF10	47	1286.51	2.5	131	139	S1:Phosphorylation (STY):8.64	S131	ERRRSRSRSFDYN	3935.3	39031.5
Q9UQ35	Q9UQ35|SRRM2_HUMAN	S	RS(+79.97)PS(+79.97)VSS(+79.97)PEPAEK	2	13	Serine/arginine repetitive matrix protein 2 OS=Homo sapiens OX=9606 GN=SRRM2 PE=1 SV=2	Serine/arginine repetitive matrix protein 2	SRRM2	31.27	1609.58	-1.9	1726	1738	S2:Phosphorylation (STY):33.81;S4:Phosphorylation (STY):22.85;S7:Phosphorylation (STY):0.00	S1727	PPRHRRSPSVSSP	450.693	4476.73
Q9UQ35	Q9UQ35|SRRM2_HUMAN	S	RS(+79.97)PS(+79.97)VSS(+79.97)PEPAEK	4	13	Serine/arginine repetitive matrix protein 2 OS=Homo sapiens OX=9606 GN=SRRM2 PE=1 SV=2	Serine/arginine repetitive matrix protein 2	SRRM2	31.27	1609.58	-1.9	1726	1738	S2:Phosphorylation (STY):33.81;S4:Phosphorylation (STY):22.85;S7:Phosphorylation (STY):0.00	S1729	RHRRSPSVSSPEP	450.693	4476.73
Q9UQ35	Q9UQ35|SRRM2_HUMAN	S	RS(+79.97)PS(+79.97)VSS(+79.97)PEPAEK	7	13	Serine/arginine repetitive matrix protein 2 OS=Homo sapiens OX=9606 GN=SRRM2 PE=1 SV=2	Serine/arginine repetitive matrix protein 2	SRRM2	31.27	1609.58	-1.9	1726	1738	S2:Phosphorylation (STY):33.81;S4:Phosphorylation (STY):22.85;S7:Phosphorylation (STY):0.00	S1732	RSPSVSSPEPAEK	450.693	4476.73
O15085	O15085|ARHGB_HUMAN	T	SLGGESSGGT(+79.97)T(+79.97)PVGSFHTEAAR	10	22	Rho guanine nucleotide exchange factor 11 OS=Homo sapiens OX=9606 GN=ARHGEF11 PE=1 SV=1	Rho guanine nucleotide exchange factor 11	ARHGEF11	28.45	2263.91	1.6	1452	1473	T10:Phosphorylation (STY):5.55;T11:Phosphorylation (STY):4.75	T1461	GESSGGTTPVGSF	202.055	2007.28
O15085	O15085|ARHGB_HUMAN	T	SLGGESSGGT(+79.97)T(+79.97)PVGSFHTEAAR	11	22	Rho guanine nucleotide exchange factor 11 OS=Homo sapiens OX=9606 GN=ARHGEF11 PE=1 SV=1	Rho guanine nucleotide exchange factor 11	ARHGEF11	28.45	2263.91	1.6	1452	1473	T10:Phosphorylation (STY):5.55;T11:Phosphorylation (STY):4.75	T1462	ESSGGTTPVGSFH	202.055	2007.28
Q12888	Q12888|TP53B_HUMAN	S	C(+57.02)S(+79.97)DS(+79.97)QSWEDIAPEIEPC(+57.02)AENR	2	21	TP53-binding protein 1 OS=Homo sapiens OX=9606 GN=TP53BP1 PE=1 SV=2	TP53-binding protein 1	TP53BP1	44.85	2651.95	-3	781	801	C1:Carbamidomethylation:1000.00;S2:Phosphorylation (STY):0.00;S4:Phosphorylation (STY):0.00;C17:Carbamidomethylation:1000.00	S782	EGVEKCSDSQSWE	381.925	3796.81
Q12888	Q12888|TP53B_HUMAN	S	C(+57.02)S(+79.97)DS(+79.97)QSWEDIAPEIEPC(+57.02)AENR	4	21	TP53-binding protein 1 OS=Homo sapiens OX=9606 GN=TP53BP1 PE=1 SV=2	TP53-binding protein 1	TP53BP1	44.85	2651.95	-3	781	801	C1:Carbamidomethylation:1000.00;S2:Phosphorylation (STY):0.00;S4:Phosphorylation (STY):0.00;C17:Carbamidomethylation:1000.00	S784	VEKCSDSQSWEDI	381.925	3796.81
Q1MSJ5	Q1MSJ5|CSPP1_HUMAN	S	LQRPPS(+79.97)VDSIIR	6	12	Centrosome and spindle pole-associated protein 1 OS=Homo sapiens OX=9606 GN=CSPP1 PE=1 SV=4	Centrosome and spindle pole-associated protein 1	CSPP1	27.16	1459.75	1	896	907	S6:Phosphorylation (STY):16.66	S901	KLQRPPSVDSIIR	50.2148	499.232
O00567	O00567|NOP56_HUMAN	S	S(+79.97)FSKEELMS(+79.97)SDLEETAGSTSIPK	1	23	Nucleolar protein 56 OS=Homo sapiens OX=9606 GN=NOP56 PE=1 SV=4	Nucleolar protein 56	NOP56	51.04	2632.09	0.3	511	533	S1:Phosphorylation (STY):0.00;S9:Phosphorylation (STY):0.00	S511	KPKKKKSFSKEEL	213.702	2124.78
O00567	O00567|NOP56_HUMAN	S	S(+79.97)FSKEELMS(+79.97)SDLEETAGSTSIPK	9	23	Nucleolar protein 56 OS=Homo sapiens OX=9606 GN=NOP56 PE=1 SV=4	Nucleolar protein 56	NOP56	51.04	2632.09	0.3	511	533	S1:Phosphorylation (STY):0.00;S9:Phosphorylation (STY):0.00	S519	SKEELMSSDLEET	213.702	2124.78
Q9UQ35	Q9UQ35|SRRM2_HUMAN	S	GRS(+79.97)RT(+79.97)PPTSR	3	10	Serine/arginine repetitive matrix protein 2 OS=Homo sapiens OX=9606 GN=SRRM2 PE=1 SV=2	Serine/arginine repetitive matrix protein 2	SRRM2	36.89	1273.53	-1.5	1840	1849	S3:Phosphorylation (STY):52.68;T5:Phosphorylation (STY):49.37	S1842	RRRRGRSRTPPTS	411.599	4093.95
Q9UQ35	Q9UQ35|SRRM2_HUMAN	T	GRS(+79.97)RT(+79.97)PPTSR	5	10	Serine/arginine repetitive matrix protein 2 OS=Homo sapiens OX=9606 GN=SRRM2 PE=1 SV=2	Serine/arginine repetitive matrix protein 2	SRRM2	36.89	1273.53	-1.5	1840	1849	S3:Phosphorylation (STY):52.68;T5:Phosphorylation (STY):49.37	T1844	RRGRSRTPPTSRK	411.599	4093.95
Q9HAN9	Q9HAN9|NMNA1_HUMAN	S	LEASDC(+57.02)DHQQNS(+79.97)PTLERPGR	12	20	Nicotinamide/nicotinic acid mononucleotide adenylyltransferase 1 OS=Homo sapiens OX=9606 GN=NMNAT1 PE=1 SV=1	Nicotinamide/nicotinic acid mononucleotide adenylyltransferase 1	NMNAT1	65.18	2389.01	1.6	106	125	C6:Carbamidomethylation:1000.00;S12:Phosphorylation (STY):15.73	S117	CDHQQNSPTLERP	794.648	7911.5
Q92560	Q92560|BAP1_HUMAN	Y	VPVRPPQQY(+79.97)SDDEDDYEDDEEDDVQNTNSALR	9	32	Ubiquitin carboxyl-terminal hydrolase BAP1 OS=Homo sapiens OX=9606 GN=BAP1 PE=1 SV=2	Ubiquitin carboxyl-terminal hydrolase BAP1	BAP1	53.79	3832.55	1.2	386	417	Y9:Phosphorylation (STY):8.69	Y394	VRPPQQYSDDEDD	5601.15	55799.9
Q92560	Q92560|BAP1_HUMAN	S	VPVRPPQQYS(+79.97)DDEDDYEDDEEDDVQNTNSALR	10	32	Ubiquitin carboxyl-terminal hydrolase BAP1 OS=Homo sapiens OX=9606 GN=BAP1 PE=1 SV=2	Ubiquitin carboxyl-terminal hydrolase BAP1	BAP1	72.38	3832.55	1.3	386	417	S10:Phosphorylation (STY):6.67	S395	RPPQQYSDDEDDY	5601.15	55799.9
Q9H410	Q9H410|DSN1_HUMAN	S	THDHQLESS(+79.97)LS(+79.97)PVEVFAK	9	18	Kinetochore-associated protein DSN1 homolog OS=Homo sapiens OX=9606 GN=DSN1 PE=1 SV=2	Kinetochore-associated protein DSN1 homolog	DSN1	48.34	2182.93	-0.1	20	37	S9:Phosphorylation (STY):0.00;S11:Phosphorylation (STY):12.33	S28	DHQLESSLSPVEV	33.0273	329.288
Q9H410	Q9H410|DSN1_HUMAN	S	THDHQLESS(+79.97)LS(+79.97)PVEVFAK	11	18	Kinetochore-associated protein DSN1 homolog OS=Homo sapiens OX=9606 GN=DSN1 PE=1 SV=2	Kinetochore-associated protein DSN1 homolog	DSN1	48.34	2182.93	-0.1	20	37	S9:Phosphorylation (STY):0.00;S11:Phosphorylation (STY):12.33	S30	QLESSLSPVEVFA	33.0273	329.288
P46821	P46821|MAP1B_HUMAN	S	IAELEEEQS(+79.97)QGSTTNSDWM(+15.99)K	9	20	Microtubule-associated protein 1B OS=Homo sapiens OX=9606 GN=MAP1B PE=1 SV=2	Microtubule-associated protein 1B	MAP1B	23.97	2377.96	-2.2	328	347	S9:Phosphorylation (STY):0.00;M19:Oxidation (M):1000.00	S336	ELEEEQSQGSTTN	303.759	3029.97
Q15811	Q15811|ITSN1_HUMAN	S	STS(+79.97)MDSGSSESPASLK	3	16	Intersectin-1 OS=Homo sapiens OX=9606 GN=ITSN1 PE=1 SV=3	Intersectin-1	ITSN1	74.23	1649.65	1	976	991	S3:Phosphorylation (STY):6.59	S978	PIRKSTSMDSGSS	139.388	1391.59
Q3YEC7	Q3YEC7|RABL6_HUMAN	S	GS(+79.97)PPLPAGPVPSQDITLSSEEEAEVAAPTK	2	30	Rab-like protein 6 OS=Homo sapiens OX=9606 GN=RABL6 PE=1 SV=2	Rab-like protein 6	RABL6	63.53	3053.45	1.5	453	482	S2:Phosphorylation (STY):25.89	S454	EDQPRGSPPLPAG	471.983	4720.82
Q5QP82	Q5QP82|DCA10_HUMAN	S	SGELGLPGAPESSTASAPGEPS(+79.97)PPSPPC(+57.02)R	22	29	DDB1- and CUL4-associated factor 10 OS=Homo sapiens OX=9606 GN=DCAF10 PE=1 SV=1	DDB1- and CUL4-associated factor 10	DCAF10	48.9	2868.26	3.1	68	96	S22:Phosphorylation (STY):0.00;C28:Carbamidomethylation:1000.00	S89	SAPGEPSPPSPPC	710.978	7132.47
Q5T8P6	Q9P260|RELCH_HUMAN:Q5T8P6|RBM26_HUMAN	S	EGS(+79.97)TQQLQTTSPK	3	13	RNA-binding protein 26 OS=Homo sapiens OX=9606 GN=RBM26 PE=1 SV=3	RNA-binding protein 26	RBM26	64.73	1483.66	-6.2	606	618	S3:Phosphorylation (STY):8.69	S608	YWHREGSTQQLQT	5525.09	55437.8
Q96HC4	Q96HC4|PDLI5_HUMAN	T	QPTVTSVC(+57.02)SET(+79.97)SQELAEGQR	11	20	PDZ and LIM domain protein 5 OS=Homo sapiens OX=9606 GN=PDLIM5 PE=1 SV=5	PDZ and LIM domain protein 5	PDLIM5	38.41	2285.98	1	206	225	C8:Carbamidomethylation:1000.00;T11:Phosphorylation (STY):0.00	T216	TSVCSETSQELAE	62.9588	632.137
P29590	P29590|PML_HUMAN	S	QPS(+79.97)PS(+79.97)PS(+79.97)PTER	3	11	Protein PML OS=Homo sapiens OX=9606 GN=PML PE=1 SV=3	Protein PML	PML	37.37	1421.47	0	34	44	S3:Phosphorylation (STY):41.57;S5:Phosphorylation (STY):19.86;S7:Phosphorylation (STY):11.10	S36	SEGRQPSPSPSPT	1472.49	14845.9
P29590	P29590|PML_HUMAN	S	QPS(+79.97)PS(+79.97)PS(+79.97)PTER	5	11	Protein PML OS=Homo sapiens OX=9606 GN=PML PE=1 SV=3	Protein PML	PML	37.37	1421.47	0	34	44	S3:Phosphorylation (STY):41.57;S5:Phosphorylation (STY):19.86;S7:Phosphorylation (STY):11.10	S38	GRQPSPSPSPTER	1472.49	14845.9
P29590	P29590|PML_HUMAN	S	QPS(+79.97)PS(+79.97)PS(+79.97)PTER	7	11	Protein PML OS=Homo sapiens OX=9606 GN=PML PE=1 SV=3	Protein PML	PML	37.37	1421.47	0	34	44	S3:Phosphorylation (STY):41.57;S5:Phosphorylation (STY):19.86;S7:Phosphorylation (STY):11.10	S40	QPSPSPSPTERAP	1472.49	14845.9
Q7KZ85	Q7KZ85|SPT6H_HUMAN	S	S(+42.01)DFVES(+79.97)EAEES(+79.97)EEEYNDEGEVVPR	6	24	Transcription elongation factor SPT6 OS=Homo sapiens OX=9606 GN=SUPT6H PE=1 SV=2	Transcription elongation factor SPT6	SUPT6H	72	2975.08	1.5	2	25	S1:Acetylation (Protein N-term):1000.00;S6:Phosphorylation (STY):61.14;S11:Phosphorylation (STY):42.89	S7	MSDFVESEAEESE	118.425	1197.4
Q7KZ85	Q7KZ85|SPT6H_HUMAN	S	S(+42.01)DFVES(+79.97)EAEES(+79.97)EEEYNDEGEVVPR	11	24	Transcription elongation factor SPT6 OS=Homo sapiens OX=9606 GN=SUPT6H PE=1 SV=2	Transcription elongation factor SPT6	SUPT6H	72	2975.08	1.5	2	25	S1:Acetylation (Protein N-term):1000.00;S6:Phosphorylation (STY):61.14;S11:Phosphorylation (STY):42.89	S12	ESEAEESEEEYND	118.425	1197.4
Q96RU3	Q96RU3|FNBP1_HUMAN	S	ESPDGSYTEEQS(+79.97)QESEMK	12	18	Formin-binding protein 1 OS=Homo sapiens OX=9606 GN=FNBP1 PE=1 SV=2	Formin-binding protein 1	FNBP1	41.01	2139.78	1.1	516	533	S12:Phosphorylation (STY):12.16	S527	SYTEEQSQESEMK	307.729	3113.2
Q8IYB3	Q8IYB3|SRRM1_HUMAN	S	YSPS(+79.97)PPPK	4	8	Serine/arginine repetitive matrix protein 1 OS=Homo sapiens OX=9606 GN=SRRM1 PE=1 SV=2	Serine/arginine repetitive matrix protein 1	SRRM1	30.86	951.41	-5	604	611	S4:Phosphorylation (STY):22.85	S607	QRRYSPSPPPKRR	191.569	1942.52
Q00341	Q00341|VIGLN_HUMAN	S	DC(+57.02)DPGS(+79.97)PR	6	8	Vigilin OS=Homo sapiens OX=9606 GN=HDLBP PE=1 SV=2	Vigilin	HDLBP	52.75	982.322	-2.4	939	946	C2:Carbamidomethylation:1000.00	S944	KDCDPGSPRRCDI	706.12	7164.17
P53814	P53814|SMTN_HUMAN	T	T(+79.97)TSPEPQESPTLPSTEGQVVNK	1	22	Smoothelin OS=Homo sapiens OX=9606 GN=SMTN PE=1 SV=7	Smoothelin	SMTN	63.44	2405.1	1.7	243	264	T1:Phosphorylation (STY):0.00	T243	PPSPPKTTSPEPQ	449.868	4583.69
P41227	P41227|NAA10_HUMAN	S	DLS(+79.97)EVSETTESTDVK	3	15	N-alpha-acetyltransferase 10 OS=Homo sapiens OX=9606 GN=NAA10 PE=1 SV=1	N-alpha-acetyltransferase 10	NAA10	55.62	1718.71	4.1	211	225	S3:Phosphorylation (STY):34.94	S213	GDSKDLSEVSETT	211.499	2155.79
P78316	P78316|NOP14_HUMAN	S	HNDIVDS(+79.97)DSDAEDRGTLSAELT(+79.97)AAHFGGGGGLLHK	7	35	Nucleolar protein 14 OS=Homo sapiens OX=9606 GN=NOP14 PE=1 SV=3	Nucleolar protein 14	NOP14	46.79	3721.6	3.9	140	174	S7:Phosphorylation (STY):0.00;T22:Phosphorylation (STY):0.00	S146	HNDIVDSDSDAED	1079.74	11006.3
P78316	P78316|NOP14_HUMAN	T	HNDIVDS(+79.97)DSDAEDRGTLSAELT(+79.97)AAHFGGGGGLLHK	22	35	Nucleolar protein 14 OS=Homo sapiens OX=9606 GN=NOP14 PE=1 SV=3	Nucleolar protein 14	NOP14	46.79	3721.6	3.9	140	174	S7:Phosphorylation (STY):0.00;T22:Phosphorylation (STY):0.00	T161	TLSAELTAAHFGG	1079.74	11006.3
Q3KQU3	Q3KQU3|MA7D1_HUMAN	S	S(+79.97)SQPSPTAVPASDS(+79.97)PPTKQEVK	1	22	MAP7 domain-containing protein 1 OS=Homo sapiens OX=9606 GN=MAP7D1 PE=1 SV=1	MAP7 domain-containing protein 1	MAP7D1	21.79	2397.05	-5.6	112	133	S1:Phosphorylation (STY):0.00;S14:Phosphorylation (STY):0.00	S112	ARPPRRSSQPSPT	133.45	1360.37
Q3KQU3	Q3KQU3|MA7D1_HUMAN	S	S(+79.97)SQPSPTAVPASDS(+79.97)PPTKQEVK	14	22	MAP7 domain-containing protein 1 OS=Homo sapiens OX=9606 GN=MAP7D1 PE=1 SV=1	MAP7 domain-containing protein 1	MAP7D1	21.79	2397.05	-5.6	112	133	S1:Phosphorylation (STY):0.00;S14:Phosphorylation (STY):0.00	S125	AVPASDSPPTKQE	133.45	1360.37
Q9UQ35	Q9UQ35|SRRM2_HUMAN	S	SS(+79.97)GHSS(+79.97)SELS(+79.97)PDAVEK	2	16	Serine/arginine repetitive matrix protein 2 OS=Homo sapiens OX=9606 GN=SRRM2 PE=1 SV=2	Serine/arginine repetitive matrix protein 2	SRRM2	20.66	1855.63	-1.8	1378	1393	S2:Phosphorylation (STY):0.00;S6:Phosphorylation (STY):0.00;S10:Phosphorylation (STY):6.63	S1379	EQSTRSSGHSSSE	207.718	2120.88
Q9UQ35	Q9UQ35|SRRM2_HUMAN	S	SS(+79.97)GHSS(+79.97)SELS(+79.97)PDAVEK	6	16	Serine/arginine repetitive matrix protein 2 OS=Homo sapiens OX=9606 GN=SRRM2 PE=1 SV=2	Serine/arginine repetitive matrix protein 2	SRRM2	20.66	1855.63	-1.8	1378	1393	S2:Phosphorylation (STY):0.00;S6:Phosphorylation (STY):0.00;S10:Phosphorylation (STY):6.63	S1383	RSSGHSSSELSPD	207.718	2120.88
Q9UQ35	Q9UQ35|SRRM2_HUMAN	S	SS(+79.97)GHSS(+79.97)SELS(+79.97)PDAVEK	10	16	Serine/arginine repetitive matrix protein 2 OS=Homo sapiens OX=9606 GN=SRRM2 PE=1 SV=2	Serine/arginine repetitive matrix protein 2	SRRM2	20.66	1855.63	-1.8	1378	1393	S2:Phosphorylation (STY):0.00;S6:Phosphorylation (STY):0.00;S10:Phosphorylation (STY):6.63	S1387	HSSSELSPDAVEK	207.718	2120.88
Q9H6Z4	Q9H6Z4|RANB3_HUMAN	S	MPAPEPGAAPS(+79.97)NEEDDS(+79.97)DDDDVLAPSGATAAGAGDEGDGQTTGST	11	45	Ran-binding protein 3 OS=Homo sapiens OX=9606 GN=RANBP3 PE=1 SV=1	Ran-binding protein 3	RANBP3	76.09	4404.65	2.3	523	567	S11:Phosphorylation (STY):24.79;S17:Phosphorylation (STY):31.37	S533	EPGAAPSNEEDDS	62.7106	640.487
Q9H6Z4	Q9H6Z4|RANB3_HUMAN	S	MPAPEPGAAPS(+79.97)NEEDDS(+79.97)DDDDVLAPSGATAAGAGDEGDGQTTGST	17	45	Ran-binding protein 3 OS=Homo sapiens OX=9606 GN=RANBP3 PE=1 SV=1	Ran-binding protein 3	RANBP3	76.09	4404.65	2.3	523	567	S11:Phosphorylation (STY):24.79;S17:Phosphorylation (STY):31.37	S539	SNEEDDSDDDDVL	62.7106	640.487
Q9Y5P4	Q9Y5P4|CERT_HUMAN	S	S(+79.97)SSMSSIDLVSASDDVHR	1	18	Ceramide transfer protein OS=Homo sapiens OX=9606 GN=CERT1 PE=1 SV=1	Ceramide transfer protein	CERT1	62.06	1971.82	0.5	375	392	S1:Phosphorylation (STY):0.00	S375	QKPYSRSSSMSSI	89.6792	917.808
Q04724	Q04724|TLE1_HUMAN	Y	DSSHY(+79.97)DSDGDKS(+79.97)DDNLVVDVSNEDPSS(+79.97)PR	5	29	Transducin-like enhancer protein 1 OS=Homo sapiens OX=9606 GN=TLE1 PE=1 SV=2	Transducin-like enhancer protein 1	TLE1	42.76	3390.21	3	233	261	Y5:Phosphorylation (STY):0.00;S12:Phosphorylation (STY):3.84;S27:Phosphorylation (STY):0.00	Y237	DKDSSHYDSDGDK	148.646	1521.85
Q04724	Q04724|TLE1_HUMAN	S	DSSHY(+79.97)DSDGDKS(+79.97)DDNLVVDVSNEDPSS(+79.97)PR	12	29	Transducin-like enhancer protein 1 OS=Homo sapiens OX=9606 GN=TLE1 PE=1 SV=2	Transducin-like enhancer protein 1	TLE1	42.76	3390.21	3	233	261	Y5:Phosphorylation (STY):0.00;S12:Phosphorylation (STY):3.84;S27:Phosphorylation (STY):0.00	S244	DSDGDKSDDNLVV	148.646	1521.85
Q04724	Q04724|TLE1_HUMAN	S	DSSHY(+79.97)DSDGDKS(+79.97)DDNLVVDVSNEDPSS(+79.97)PR	27	29	Transducin-like enhancer protein 1 OS=Homo sapiens OX=9606 GN=TLE1 PE=1 SV=2	Transducin-like enhancer protein 1	TLE1	42.76	3390.21	3	233	261	Y5:Phosphorylation (STY):0.00;S12:Phosphorylation (STY):3.84;S27:Phosphorylation (STY):0.00	S259	SNEDPSSPRASPA	148.646	1521.85
Q7Z5L9	Q7Z5L9|I2BP2_HUMAN	T	TT(+79.97)PPEAAQNGQSPMAALILVADNAGGSHASK	2	31	Interferon regulatory factor 2-binding protein 2 OS=Homo sapiens OX=9606 GN=IRF2BP2 PE=1 SV=2	Interferon regulatory factor 2-binding protein 2	IRF2BP2	66.72	3083.44	3.4	412	442	T2:Phosphorylation (STY):0.00	T413	PHSNRTTPPEAAQ	147.966	1516.09
Q9BVL2	Q9BVL2|NUP58_HUMAN	T	T(+79.97)QKTPPGLQHEYAAPADYFR	1	20	Nucleoporin p58/p45 OS=Homo sapiens OX=9606 GN=NUP58 PE=1 SV=1	Nucleoporin p58/p45	NUP58	25.65	2369.08	4.8	328	347	T1:Phosphorylation (STY):0.00	T328	AEIALRTQKTPPG	51.9034	532.152
Q9NQC3	Q9NQC3|RTN4_HUMAN	S	M(+42.01)EDLDQSPLVSS(+79.97)S(+79.97)DSPPRPQPAFK	12	24	Reticulon-4 OS=Homo sapiens OX=9606 GN=RTN4 PE=1 SV=2	Reticulon-4	RTN4	63.24	2829.2	-1.5	1	24	M1:Acetylation (Protein N-term):1000.00;S12:Phosphorylation (STY):0.00;S13:Phosphorylation (STY):0.00	S12	QSPLVSSSDSPPR	217.514	2231.01
Q9NQC3	Q9NQC3|RTN4_HUMAN	S	M(+42.01)EDLDQSPLVSS(+79.97)S(+79.97)DSPPRPQPAFK	13	24	Reticulon-4 OS=Homo sapiens OX=9606 GN=RTN4 PE=1 SV=2	Reticulon-4	RTN4	63.24	2829.2	-1.5	1	24	M1:Acetylation (Protein N-term):1000.00;S12:Phosphorylation (STY):0.00;S13:Phosphorylation (STY):0.00	S13	SPLVSSSDSPPRP	217.514	2231.01
Q9UHR5	Q9UHR5|S30BP_HUMAN	S	LGGDEDGYEEEEDENS(+79.97)RQSEDDDSET(+79.97)EKPEADDPK	16	35	SAP30-binding protein OS=Homo sapiens OX=9606 GN=SAP30BP PE=1 SV=1	SAP30-binding protein	SAP30BP	25.2	4117.48	3.2	54	88	S16:Phosphorylation (STY):0.00;T26:Phosphorylation (STY):0.00	S69	EEEDENSRQSEDD	2819.13	28929.2
Q9UHR5	Q9UHR5|S30BP_HUMAN	T	LGGDEDGYEEEEDENS(+79.97)RQSEDDDSET(+79.97)EKPEADDPK	26	35	SAP30-binding protein OS=Homo sapiens OX=9606 GN=SAP30BP PE=1 SV=1	SAP30-binding protein	SAP30BP	25.2	4117.48	3.2	54	88	S16:Phosphorylation (STY):0.00;T26:Phosphorylation (STY):0.00	T79	EDDDSETEKPEAD	2819.13	28929.2
Q9BRX2	Q9BRX2|PELO_HUMAN	S	FPVPELSDQEGDSS(+79.97)SEED	14	18	Protein pelota homolog OS=Homo sapiens OX=9606 GN=PELO PE=1 SV=2	Protein pelota homolog	PELO	69.22	2045.76	-2.1	368	385	S14:Phosphorylation (STY):20.00	S381	DQEGDSSSEED__	885.959	9099.47
Q9ULX6	Q9ULX6|AKP8L_HUMAN	T	T(+79.97)DC(+57.02)SDNS(+79.97)DS(+79.97)DNDEGTEGEATEGLEGTEAVEK	1	31	A-kinase anchor protein 8-like OS=Homo sapiens OX=9606 GN=AKAP8L PE=1 SV=4	A-kinase anchor protein 8-like	AKAP8L	59.32	3500.15	1.8	294	324	T1:Phosphorylation (STY):0.00;C3:Carbamidomethylation:1000.00;S7:Phosphorylation (STY):9.42;S9:Phosphorylation (STY):11.54	T294	DSKATRTDCSDNS	580.687	5969.08
Q9ULX6	Q9ULX6|AKP8L_HUMAN	S	T(+79.97)DC(+57.02)SDNS(+79.97)DS(+79.97)DNDEGTEGEATEGLEGTEAVEK	7	31	A-kinase anchor protein 8-like OS=Homo sapiens OX=9606 GN=AKAP8L PE=1 SV=4	A-kinase anchor protein 8-like	AKAP8L	59.32	3500.15	1.8	294	324	T1:Phosphorylation (STY):0.00;C3:Carbamidomethylation:1000.00;S7:Phosphorylation (STY):9.42;S9:Phosphorylation (STY):11.54	S300	TDCSDNSDSDNDE	580.687	5969.08
Q9ULX6	Q9ULX6|AKP8L_HUMAN	S	T(+79.97)DC(+57.02)SDNS(+79.97)DS(+79.97)DNDEGTEGEATEGLEGTEAVEK	9	31	A-kinase anchor protein 8-like OS=Homo sapiens OX=9606 GN=AKAP8L PE=1 SV=4	A-kinase anchor protein 8-like	AKAP8L	59.32	3500.15	1.8	294	324	T1:Phosphorylation (STY):0.00;C3:Carbamidomethylation:1000.00;S7:Phosphorylation (STY):9.42;S9:Phosphorylation (STY):11.54	S302	CSDNSDSDNDEGT	580.687	5969.08
Q7KZ85	Q7KZ85|SPT6H_HUMAN	S	S(+42.01)(+79.97)DFVESEAEES(+79.97)EEEYNDEGEVVPR	1	24	Transcription elongation factor SPT6 OS=Homo sapiens OX=9606 GN=SUPT6H PE=1 SV=2	Transcription elongation factor SPT6	SUPT6H	65.6	2975.08	6.7	2	25	S1:Acetylation (Protein N-term):23.70;)1:Phosphorylation (STY):23.70;S11:Phosphorylation (STY):14.19	S2	_____MSDFVESE	116.281	1197.4
Q7KZ85	Q7KZ85|SPT6H_HUMAN	S	S(+42.01)(+79.97)DFVESEAEES(+79.97)EEEYNDEGEVVPR	11	24	Transcription elongation factor SPT6 OS=Homo sapiens OX=9606 GN=SUPT6H PE=1 SV=2	Transcription elongation factor SPT6	SUPT6H	65.6	2975.08	6.7	2	25	S1:Acetylation (Protein N-term):23.70;)1:Phosphorylation (STY):23.70;S11:Phosphorylation (STY):14.19	S12	ESEAEESEEEYND	116.281	1197.4
Q92530	Q92530|PSMF1_HUMAN	S	FDPFGPIGTS(+79.97)PPGPNPDHLPPPGYDDMYL	10	29	Proteasome inhibitor PI31 subunit OS=Homo sapiens OX=9606 GN=PSMF1 PE=1 SV=2	Proteasome inhibitor PI31 subunit	PSMF1	51.31	3189.38	-4.3	243	271	S10:Phosphorylation (STY):0.00	S252	FGPIGTSPPGPNP	761.331	7845.06
Q9NPQ8	Q9NPQ8|RIC8A_HUMAN	S	GHLTSLQDAMC(+57.02)ETMEQQLSS(+79.97)DPDS(+79.97)DPD	20	27	Synembryn-A OS=Homo sapiens OX=9606 GN=RIC8A PE=1 SV=3	Synembryn-A	RIC8A	70.65	3166.15	-2.8	505	531	C11:Carbamidomethylation:1000.00;S20:Phosphorylation (STY):0.00;S24:Phosphorylation (STY):17.91	S524	MEQQLSSDPDSDP	286.507	2955.53
Q9NPQ8	Q9NPQ8|RIC8A_HUMAN	S	GHLTSLQDAMC(+57.02)ETMEQQLSS(+79.97)DPDS(+79.97)DPD	24	27	Synembryn-A OS=Homo sapiens OX=9606 GN=RIC8A PE=1 SV=3	Synembryn-A	RIC8A	70.65	3166.15	-2.8	505	531	C11:Carbamidomethylation:1000.00;S20:Phosphorylation (STY):0.00;S24:Phosphorylation (STY):17.91	S528	LSSDPDSDPD___	286.507	2955.53
Q9P227	Q9P227|RHG23_HUMAN	S	SAEALGPGALVS(+79.97)PR	12	14	Rho GTPase-activating protein 23 OS=Homo sapiens OX=9606 GN=ARHGAP23 PE=1 SV=2	Rho GTPase-activating protein 23	ARHGAP23	52.4	1403.68	-2.9	361	374	S12:Phosphorylation (STY):52.50	S372	GPGALVSPRFERC	55.3341	571.17
Q9H3Q3	Q9H3Q3|G3ST2_HUMAN:Q14676|MDC1_HUMAN	T	LSPET(+79.97)RER	5	8	Galactose-3-O-sulfotransferase 2 OS=Homo sapiens OX=9606 GN=GAL3ST2 PE=1 SV=2	Galactose-3-O-sulfotransferase 2	GAL3ST2	22.65	1066.48	-11.6	264	271	T5:Phosphorylation (STY):47.09	T268	ARLSPETRERARS	72.5036	748.661
Q8N1G0	Q8N1G0|ZN687_HUMAN	S	AVVLPGGTATS(+79.97)PK	11	13	Zinc finger protein 687 OS=Homo sapiens OX=9606 GN=ZNF687 PE=1 SV=1	Zinc finger protein 687	ZNF687	53.39	1276.64	-4.3	423	435	S11:Phosphorylation (STY):0.00	S433	PGGTATSPKMIAK	1552.11	16038.9
Q9UKF7	Q9UKF7|PITC1_HUMAN	S	S(+79.97)APSSAPSTPLSTDAPEFLSVPK	1	23	Cytoplasmic phosphatidylinositol transfer protein 1 OS=Homo sapiens OX=9606 GN=PITPNC1 PE=1 SV=3	Cytoplasmic phosphatidylinositol transfer protein 1	PITPNC1	48.41	2365.11	2.5	270	292	S1:Phosphorylation (STY):12.33	S270	LPSSVRSAPSSAP	2215.05	22892.6
O14617	O14617|AP3D1_HUMAN	T	HSSLPT(+79.97)ESDEDIAPAQQVDIVTEEMPENALPS(+79.97)DEDDKD	6	38	AP-3 complex subunit delta-1 OS=Homo sapiens OX=9606 GN=AP3D1 PE=1 SV=1	AP-3 complex subunit delta-1	AP3D1	36.06	4325.76	8.5	757	794	T6:Phosphorylation (STY):0.00;S32:Phosphorylation (STY):7.40	T762	RHSSLPTESDEDI	109.992	1137.09
O14617	O14617|AP3D1_HUMAN	S	HSSLPT(+79.97)ESDEDIAPAQQVDIVTEEMPENALPS(+79.97)DEDDKD	32	38	AP-3 complex subunit delta-1 OS=Homo sapiens OX=9606 GN=AP3D1 PE=1 SV=1	AP-3 complex subunit delta-1	AP3D1	36.06	4325.76	8.5	757	794	T6:Phosphorylation (STY):0.00;S32:Phosphorylation (STY):7.40	S788	PENALPSDEDDKD	109.992	1137.09
Q15149	Q15149|PLEC_HUMAN	S	GYYSPYSVSGS(+79.97)GSTAGS(+79.97)R	11	18	Plectin OS=Homo sapiens OX=9606 GN=PLEC PE=1 SV=3	Plectin	PLEC	66.92	1941.72	2.3	4610	4627	S11:Phosphorylation (STY):9.16;S17:Phosphorylation (STY):8.87	S4620	PYSVSGSGSTAGS	209.38	2165.98
Q15149	Q15149|PLEC_HUMAN	S	GYYSPYSVSGS(+79.97)GSTAGS(+79.97)R	17	18	Plectin OS=Homo sapiens OX=9606 GN=PLEC PE=1 SV=3	Plectin	PLEC	66.92	1941.72	2.3	4610	4627	S11:Phosphorylation (STY):9.16;S17:Phosphorylation (STY):8.87	S4626	SGSTAGSRTGSRT	209.38	2165.98
P41236	P41236|IPP2_HUMAN:Q6NXS1|IPP2B_HUMAN	T	TST(+79.97)TSSMVASAEQPR	3	15	Protein phosphatase inhibitor 2 OS=Homo sapiens OX=9606 GN=PPP1R2 PE=1 SV=2	Protein phosphatase inhibitor 2	PPP1R2	42.93	1631.69	1.5	19	33	T3:Phosphorylation (STY):0.00	T21	LKNKTSTTSSMVA	305.032	3156.03
P78559	P78559|MAP1A_HUMAN	S	SLQSDTPTFSYAALAGPTVPPRPEPGPS(+79.97)MEPSLTPPAVPPR	28	41	Microtubule-associated protein 1A OS=Homo sapiens OX=9606 GN=MAP1A PE=1 SV=6	Microtubule-associated protein 1A	MAP1A	35.49	4292.09	4.2	2025	2065	S28:Phosphorylation (STY):0.00	S2052	RPEPGPSMEPSLT	2603.03	26934.1
O14974	O14974|MYPT1_HUMAN	S	STGVSFWTQDSDENEQEQQS(+79.97)DTEEGSNK	20	28	Protein phosphatase 1 regulatory subunit 12A OS=Homo sapiens OX=9606 GN=PPP1R12A PE=1 SV=1	Protein phosphatase 1 regulatory subunit 12A	PPP1R12A	66.96	3241.25	-1.8	852	879	S20:Phosphorylation (STY):5.47	S871	NEQEQQSDTEEGS	612.697	6341.48
O95503	O95503|CBX6_HUMAN	S	ISDVHFSVKPSASASS(+79.97)PK	16	18	Chromobox protein homolog 6 OS=Homo sapiens OX=9606 GN=CBX6 PE=1 SV=1	Chromobox protein homolog 6	CBX6	49.88	1922.91	-1.9	92	109	S16:Phosphorylation (STY):7.21	S107	PSASASSPKLHSS	81.3612	843.593
O14976	O14976|GAK_HUMAN	S	ESESALMEDRDESEVS(+79.97)DEGGSPISSEGQEPR	16	31	Cyclin-G-associated kinase OS=Homo sapiens OX=9606 GN=GAK PE=1 SV=2	Cyclin-G-associated kinase	GAK	35.31	3417.37	3	814	844	S16:Phosphorylation (STY):0.00	S829	RDESEVSDEGGSP	268.641	2788.46
Q9Y252	Q9Y252|RNF6_HUMAN	S	EQLAS(+79.97)QPDLR	5	10	E3 ubiquitin-protein ligase RNF6 OS=Homo sapiens OX=9606 GN=RNF6 PE=1 SV=1	E3 ubiquitin-protein ligase RNF6	RNF6	38.51	1235.55	-3.5	81	90		S85	VKEQLASQPDLRD	225.26	2339.5
Q63HN8	Q63HN8|RN213_HUMAN	T	LPPAAPIADSENNNST(+79.97)MASASEGEMEC(+57.02)GQELK	16	32	E3 ubiquitin-protein ligase RNF213 OS=Homo sapiens OX=9606 GN=RNF213 PE=1 SV=3	E3 ubiquitin-protein ligase RNF213	RNF213	58.57	3427.43	-0.8	25	56	T16:Phosphorylation (STY):0.00;C27:Carbamidomethylation:1000.00	T40	SENNNSTMASASE	176.057	1830.38
O75116	O75116|ROCK2_HUMAN	S	SQLQALHIGLDS(+79.97)S(+79.97)SIGSGPGDAEADDGFPESR	12	32	Rho-associated protein kinase 2 OS=Homo sapiens OX=9606 GN=ROCK2 PE=1 SV=4	Rho-associated protein kinase 2	ROCK2	51.82	3372.42	0.6	1121	1152	S12:Phosphorylation (STY):0.00;S13:Phosphorylation (STY):0.00	S1132	LHIGLDSSSIGSG	287.528	2995.98
O75116	O75116|ROCK2_HUMAN	S	SQLQALHIGLDS(+79.97)S(+79.97)SIGSGPGDAEADDGFPESR	13	32	Rho-associated protein kinase 2 OS=Homo sapiens OX=9606 GN=ROCK2 PE=1 SV=4	Rho-associated protein kinase 2	ROCK2	51.82	3372.42	0.6	1121	1152	S12:Phosphorylation (STY):0.00;S13:Phosphorylation (STY):0.00	S1133	HIGLDSSSIGSGP	287.528	2995.98
Q9C0H5	Q9C0H5|RHG39_HUMAN	S	EDS(+79.97)GSSSPPGVFLEK	3	15	Rho GTPase-activating protein 39 OS=Homo sapiens OX=9606 GN=ARHGAP39 PE=1 SV=2	Rho GTPase-activating protein 39	ARHGAP39	49.93	1614.68	-5.2	167	181	S3:Phosphorylation (STY):0.00	S169	GTVKEDSGSSSPP	275.513	2878.68
Q9C0H5	Q9C0H5|RHG39_HUMAN	S	EDSGSS(+79.97)SPPGVFLEK	6	15	Rho GTPase-activating protein 39 OS=Homo sapiens OX=9606 GN=ARHGAP39 PE=1 SV=2	Rho GTPase-activating protein 39	ARHGAP39	44.2	1614.68	-0.7	167	181	S6:Phosphorylation (STY):0.00	S172	KEDSGSSSPPGVF	275.513	2878.68
Q13206	Q13206|DDX10_HUMAN	T	T(+79.97)ANSPGSGARPD	1	12	Probable ATP-dependent RNA helicase DDX10 OS=Homo sapiens OX=9606 GN=DDX10 PE=1 SV=2	Probable ATP-dependent RNA helicase DDX10	DDX10	19.89	1208.48	-1.4	4	15	T1:Phosphorylation (STY):16.66	T4	___MGKTANSPGS	150.274	1571.7
Q96QT6	Q96QT6|PHF12_HUMAN	S	TVQSQIGPPLTDS(+79.97)RPLGSPPNATR	13	24	PHD finger protein 12 OS=Homo sapiens OX=9606 GN=PHF12 PE=1 SV=2	PHD finger protein 12	PHF12	39.39	2568.27	0.6	645	668	S13:Phosphorylation (STY):0.00	S657	GPPLTDSRPLGSP	959.793	10044.7
P04083	P04083|ANXA1_HUMAN	S	DITS(+79.97)DTSGDFR	4	11	Annexin A1 OS=Homo sapiens OX=9606 GN=ANXA1 PE=1 SV=2	Annexin A1	ANXA1	27.36	1292.49	-2.2	167	177	S4:Phosphorylation (STY):0.00	S170	LAKDITSDTSGDF	31.5759	330.501
Q8IY17	Q8IY17|PLPL6_HUMAN	S	IEPPTSYVS(+79.97)DGC(+57.02)ADGEESDC(+57.02)LTEYEEDAGPDC(+57.02)SR	9	34	Patatin-like phospholipase domain-containing protein 6 OS=Homo sapiens OX=9606 GN=PNPLA6 PE=1 SV=3	Patatin-like phospholipase domain-containing protein 6	PNPLA6	73.67	3889.44	0.3	1301	1334	S9:Phosphorylation (STY):26.31;C12:Carbamidomethylation:1000.00;C20:Carbamidomethylation:1000.00;C32:Carbamidomethylation:1000.00	S1309	PPTSYVSDGCADG	970.064	10158.9
Q13427	Q13427|PPIG_HUMAN	S	IRS(+79.97)SVEK	3	7	Peptidyl-prolyl cis-trans isomerase G OS=Homo sapiens OX=9606 GN=PPIG PE=1 SV=2	Peptidyl-prolyl cis-trans isomerase G	PPIG	29.24	897.432	-1.5	714	720	S3:Phosphorylation (STY):9.34	S716	EDEKIRSSVEKEN	31814.8	333407
P29317	P29317|EPHA2_HUMAN	S	S(+79.97)EQLKPLK	1	8	Ephrin type-A receptor 2 OS=Homo sapiens OX=9606 GN=EPHA2 PE=1 SV=2	Ephrin type-A receptor 2	EPHA2	52.91	1021.52	-0.8	579	586		S579	DVYFSKSEQLKPL	135.565	1425.14
Q9Y2W2	Q9Y2W2|WBP11_HUMAN	S	S(+79.97)EDDSAVPLAK	1	11	WW domain-binding protein 11 OS=Homo sapiens OX=9606 GN=WBP11 PE=1 SV=1	WW domain-binding protein 11	WBP11	53.58	1210.51	-1.1	600	610	S1:Phosphorylation (STY):22.37	S600	AAPQRKSEDDSAV	49.6675	522.209
Q86U86	Q86U86|PB1_HUMAN	S	LWEDS(+79.97)AGEK	5	9	Protein polybromo-1 OS=Homo sapiens OX=9606 GN=PBRM1 PE=1 SV=1	Protein polybromo-1	PBRM1	34.39	1113.44	-5.2	983	991		S987	ERLWEDSAGEKWL	87.565	922.774
Q9Y2K7	Q9Y2K7|KDM2A_HUMAN	S	RYEDDGIS(+79.97)DDEIEGK	8	15	Lysine-specific demethylase 2A OS=Homo sapiens OX=9606 GN=KDM2A PE=1 SV=3	Lysine-specific demethylase 2A	KDM2A	65.11	1819.71	3.4	21	35	S8:Phosphorylation (STY):151.86	S28	YEDDGISDDEIEG	2981.09	31429.4
B2RTY4	B2RTY4|MYO9A_HUMAN	S	GNYPGPSS(+79.97)PVVVR	8	13	Unconventional myosin-IXa OS=Homo sapiens OX=9606 GN=MYO9A PE=1 SV=2	Unconventional myosin-IXa	MYO9A	36.78	1407.65	4.9	2287	2299	S8:Phosphorylation (STY):0.00	S2294	NYPGPSSPVVVRL	128.405	1354.32
Q15007	Q15007|FL2D_HUMAN	S	LTNGPS(+79.97)NGSSSRQR	6	14	Pre-mRNA-splicing regulator WTAP OS=Homo sapiens OX=9606 GN=WTAP PE=1 SV=2	Pre-mRNA-splicing regulator WTAP	WTAP	28.65	1539.68	7.5	273	286	S6:Phosphorylation (STY):14.84	S278	RLTNGPSNGSSSR	388.103	4096.7
Q9Y2K1	Q8ND56|LS14A_HUMAN:Q9Y2K1|ZBTB1_HUMAN	S	VTDKDC(+57.02)NES(+79.97)TDNDELEDEPEEPFYR	9	25	Zinc finger and BTB domain-containing protein 1 OS=Homo sapiens OX=9606 GN=ZBTB1 PE=1 SV=3	Zinc finger and BTB domain-containing protein 1	ZBTB1	39.81	3125.2	-4.9	347	371	C6:Carbamidomethylation:1000.00;S9:Phosphorylation (STY):0.00	S355	DKDCNESTDNDEL	51.3355	542.601
Q71UM5	P08238|HS90B_HUMAN:P42677|RS27_HUMAN:Q71UM5|RS27L_HUMAN:P07900|HS90A_HUMAN	Y	LVQSPNSY(+79.97)FMDVK	8	13	40S ribosomal protein S27-like OS=Homo sapiens OX=9606 GN=RPS27L PE=1 SV=3	40S ribosomal protein S27-like	RPS27L	19.83	1606.71	2.9	24	36	Y8:Phosphorylation (STY):0.00	Y31	VQSPNSYFMDVKC	785.089	8300.63
P42677	P08238|HS90B_HUMAN:P42677|RS27_HUMAN:Q71UM5|RS27L_HUMAN:P07900|HS90A_HUMAN	Y	LVQSPNSY(+79.97)FMDVK	8	13	40S ribosomal protein S27 OS=Homo sapiens OX=9606 GN=RPS27 PE=1 SV=3	40S ribosomal protein S27	RPS27	19.83	1606.71	2.9	24	36	Y8:Phosphorylation (STY):0.00	Y31	VQSPNSYFMDVKC	785.089	8300.63
Q9H832	Q9H832|UBE2Z_HUMAN	S	LHNENAEMDS(+79.97)DS(+79.97)S(+79.97)SSGTETDLHGSLR	10	26	Ubiquitin-conjugating enzyme E2 Z OS=Homo sapiens OX=9606 GN=UBE2Z PE=1 SV=2	Ubiquitin-conjugating enzyme E2 Z	UBE2Z	27.76	3028.08	-0.6	328	353	S10:Phosphorylation (STY):11.12;S12:Phosphorylation (STY):0.00;S13:Phosphorylation (STY):0.00	S337	ENAEMDSDSSSSG	210.65	2230.93
Q9H832	Q9H832|UBE2Z_HUMAN	S	LHNENAEMDS(+79.97)DS(+79.97)S(+79.97)SSGTETDLHGSLR	12	26	Ubiquitin-conjugating enzyme E2 Z OS=Homo sapiens OX=9606 GN=UBE2Z PE=1 SV=2	Ubiquitin-conjugating enzyme E2 Z	UBE2Z	27.76	3028.08	-0.6	328	353	S10:Phosphorylation (STY):11.12;S12:Phosphorylation (STY):0.00;S13:Phosphorylation (STY):0.00	S339	AEMDSDSSSSGTE	210.65	2230.93
Q9H832	Q9H832|UBE2Z_HUMAN	S	LHNENAEMDS(+79.97)DS(+79.97)S(+79.97)SSGTETDLHGSLR	13	26	Ubiquitin-conjugating enzyme E2 Z OS=Homo sapiens OX=9606 GN=UBE2Z PE=1 SV=2	Ubiquitin-conjugating enzyme E2 Z	UBE2Z	27.76	3028.08	-0.6	328	353	S10:Phosphorylation (STY):11.12;S12:Phosphorylation (STY):0.00;S13:Phosphorylation (STY):0.00	S340	EMDSDSSSSGTET	210.65	2230.93
P48634	P48634|PRC2A_HUMAN	S	GS(+79.97)ET(+79.97)GSETHESDLAPSDK	2	18	Protein PRRC2A OS=Homo sapiens OX=9606 GN=PRRC2A PE=1 SV=3	Protein PRRC2A	PRRC2A	34.44	2005.72	-0.1	1105	1122	S2:Phosphorylation (STY):0.00;T4:Phosphorylation (STY):0.00	S1106	RRRQRGSETGSET	336.755	3567.72
P48634	P48634|PRC2A_HUMAN	T	GS(+79.97)ET(+79.97)GSETHESDLAPSDK	4	18	Protein PRRC2A OS=Homo sapiens OX=9606 GN=PRRC2A PE=1 SV=3	Protein PRRC2A	PRRC2A	34.44	2005.72	-0.1	1105	1122	S2:Phosphorylation (STY):0.00;T4:Phosphorylation (STY):0.00	T1108	RQRGSETGSETHE	336.755	3567.72
Q9Y3B9	Q9Y3B9|RRP15_HUMAN	Y	DHFY(+79.97)SDDDAIEADS(+79.97)EGDAEPC(+57.02)DK	4	23	RRP15-like protein OS=Homo sapiens OX=9606 GN=RRP15 PE=1 SV=2	RRP15-like protein	RRP15	44.53	2759.91	3.4	54	76	Y4:Phosphorylation (STY):0.00;S14:Phosphorylation (STY):38.72;C21:Carbamidomethylation:1000.00	Y57	SEKDHFYSDDDAI	1157.56	12300.1
Q9Y3B9	Q9Y3B9|RRP15_HUMAN	S	DHFY(+79.97)SDDDAIEADS(+79.97)EGDAEPC(+57.02)DK	14	23	RRP15-like protein OS=Homo sapiens OX=9606 GN=RRP15 PE=1 SV=2	RRP15-like protein	RRP15	44.53	2759.91	3.4	54	76	Y4:Phosphorylation (STY):0.00;S14:Phosphorylation (STY):38.72;C21:Carbamidomethylation:1000.00	S67	DAIEADSEGDAEP	1157.56	12300.1
Q9BV36	Q9BV36|MELPH_HUMAN	S	KLEELTSNVS(+79.97)DQET(+79.97)S(+79.97)SEEEEAKDEK	10	25	Melanophilin OS=Homo sapiens OX=9606 GN=MLPH PE=1 SV=1	Melanophilin	MLPH	38.43	3093.19	-2.1	388	412	S10:Phosphorylation (STY):3.38;T14:Phosphorylation (STY):7.32;S15:Phosphorylation (STY):0.00	S397	ELTSNVSDQETSS	460.593	4894.76
Q9BV36	Q9BV36|MELPH_HUMAN	T	KLEELTSNVS(+79.97)DQET(+79.97)S(+79.97)SEEEEAKDEK	14	25	Melanophilin OS=Homo sapiens OX=9606 GN=MLPH PE=1 SV=1	Melanophilin	MLPH	38.43	3093.19	-2.1	388	412	S10:Phosphorylation (STY):3.38;T14:Phosphorylation (STY):7.32;S15:Phosphorylation (STY):0.00	T401	NVSDQETSSEEEE	460.593	4894.76
Q9BV36	Q9BV36|MELPH_HUMAN	S	KLEELTSNVS(+79.97)DQET(+79.97)S(+79.97)SEEEEAKDEK	15	25	Melanophilin OS=Homo sapiens OX=9606 GN=MLPH PE=1 SV=1	Melanophilin	MLPH	38.43	3093.19	-2.1	388	412	S10:Phosphorylation (STY):3.38;T14:Phosphorylation (STY):7.32;S15:Phosphorylation (STY):0.00	S402	VSDQETSSEEEEA	460.593	4894.76
P52747	P52747|ZN143_HUMAN	T	T(+79.97)AHNDTEPIEEEQEAFFEPPPGQGEDVLK	1	29	Zinc finger protein 143 OS=Homo sapiens OX=9606 GN=ZNF143 PE=1 SV=2	Zinc finger protein 143	ZNF143	52.47	3332.44	-1.2	438	466	T1:Phosphorylation (STY):10.19	T438	LAMHKRTAHNDTE	213.579	2274.91
Q32P44	Q32P44|EMAL3_HUMAN	S	AIS(+79.97)SANLLVR	3	10	Echinoderm microtubule-associated protein-like 3 OS=Homo sapiens OX=9606 GN=EML3 PE=1 SV=1	Echinoderm microtubule-associated protein-like 3	EML3	52.34	1122.58	-5.4	174	183	S3:Phosphorylation (STY):17.01	S176	LSRKAISSANLLV	81.3848	868.257
Q02156	Q02156|KPCE_HUMAN	S	LIAGAESPQPASGS(+79.97)SPSEEDR	14	21	Protein kinase C epsilon type OS=Homo sapiens OX=9606 GN=PRKCE PE=1 SV=1	Protein kinase C epsilon type	PRKCE	36.34	2163.93	4.1	323	343	S14:Phosphorylation (STY):0.00	S336	PQPASGSSPSEED	230.124	2456.04
Q9NYB9	Q13459|MYO9B_HUMAN:Q9NYB9|ABI2_HUMAN	S	NMAPSQQS(+79.97)PVR	8	11	Abl interactor 2 OS=Homo sapiens OX=9606 GN=ABI2 PE=1 SV=1	Abl interactor 2	ABI2	52.36	1293.55	0.2	220	230	S8:Phosphorylation (STY):49.37	S227	MAPSQQSPVRTAS	3436.85	36841.2
Q02790	Q02790|FKBP4_HUMAN	T	SNT(+79.97)AGSQSQVETEA	3	14	Peptidyl-prolyl cis-trans isomerase FKBP4 OS=Homo sapiens OX=9606 GN=FKBP4 PE=1 SV=3	Peptidyl-prolyl cis-trans isomerase FKBP4	FKBP4	30.92	1487.58	1.7	446	459	T3:Phosphorylation (STY):0.00	T448	EEQKSNTAGSQSQ	43.5659	467.194
Q9UQ35	Q9UQ35|SRRM2_HUMAN	S	S(+79.97)PS(+79.97)VSS(+79.97)PEPAEK	1	12	Serine/arginine repetitive matrix protein 2 OS=Homo sapiens OX=9606 GN=SRRM2 PE=1 SV=2	Serine/arginine repetitive matrix protein 2	SRRM2	48.35	1453.48	-2.4	1727	1738	S1:Phosphorylation (STY):20.54;S3:Phosphorylation (STY):20.41;S6:Phosphorylation (STY):20.00	S1727	PPRHRRSPSVSSP	639.168	6854.82
Q9UQ35	Q9UQ35|SRRM2_HUMAN	S	S(+79.97)PS(+79.97)VSS(+79.97)PEPAEK	3	12	Serine/arginine repetitive matrix protein 2 OS=Homo sapiens OX=9606 GN=SRRM2 PE=1 SV=2	Serine/arginine repetitive matrix protein 2	SRRM2	48.35	1453.48	-2.4	1727	1738	S1:Phosphorylation (STY):20.54;S3:Phosphorylation (STY):20.41;S6:Phosphorylation (STY):20.00	S1729	RHRRSPSVSSPEP	639.168	6854.82
Q9UQ35	Q9UQ35|SRRM2_HUMAN	S	S(+79.97)PS(+79.97)VSS(+79.97)PEPAEK	6	12	Serine/arginine repetitive matrix protein 2 OS=Homo sapiens OX=9606 GN=SRRM2 PE=1 SV=2	Serine/arginine repetitive matrix protein 2	SRRM2	48.35	1453.48	-2.4	1727	1738	S1:Phosphorylation (STY):20.54;S3:Phosphorylation (STY):20.41;S6:Phosphorylation (STY):20.00	S1732	RSPSVSSPEPAEK	639.168	6854.82
Q9NWH9	Q9NWH9|SLTM_HUMAN	S	IS(+79.97)SKS(+79.97)PGHMVILDQTK	2	16	SAFB-like transcription modulator OS=Homo sapiens OX=9606 GN=SLTM PE=1 SV=2	SAFB-like transcription modulator	SLTM	53.82	1899.86	1	549	564	S2:Phosphorylation (STY):0.00;S5:Phosphorylation (STY):7.32	S550	EEKKRISSKSPGH	1462.48	15694.3
Q9NWH9	Q9NWH9|SLTM_HUMAN	S	IS(+79.97)SKS(+79.97)PGHMVILDQTK	5	16	SAFB-like transcription modulator OS=Homo sapiens OX=9606 GN=SLTM PE=1 SV=2	SAFB-like transcription modulator	SLTM	53.82	1899.86	1	549	564	S2:Phosphorylation (STY):0.00;S5:Phosphorylation (STY):7.32	S553	KRISSKSPGHMVI	1462.48	15694.3
Q9UJX2	Q9UJX2|CDC23_HUMAN	S	RVS(+79.97)PLNLSSVT(+79.97)P	3	12	Cell division cycle protein 23 homolog OS=Homo sapiens OX=9606 GN=CDC23 PE=1 SV=3	Cell division cycle protein 23 homolog	CDC23	48.64	1428.64	-1.4	586	597	S3:Phosphorylation (STY):79.02;T11:Phosphorylation (STY):67.96	S588	TPTRRVSPLNLSS	446.176	4799.23
Q9UJX2	Q9UJX2|CDC23_HUMAN	T	RVS(+79.97)PLNLSSVT(+79.97)P	11	12	Cell division cycle protein 23 homolog OS=Homo sapiens OX=9606 GN=CDC23 PE=1 SV=3	Cell division cycle protein 23 homolog	CDC23	48.64	1428.64	-1.4	586	597	S3:Phosphorylation (STY):79.02;T11:Phosphorylation (STY):67.96	T596	LNLSSVTP_____	446.176	4799.23
Q7Z460	Q7Z460|CLAP1_HUMAN	S	S(+79.97)QEDLNEPIK	1	10	CLIP-associating protein 1 OS=Homo sapiens OX=9606 GN=CLASP1 PE=1 SV=1	CLIP-associating protein 1	CLASP1	29.61	1251.54	7.2	1196	1205		S1196	EKFSFRSQEDLNE	70.6435	762.825
Q9BV73	Q9BV73|CP250_HUMAN:Q99698|LYST_HUMAN	S	TS(+79.97)PMEEQSLK	2	10	Centrosome-associated protein CEP250 OS=Homo sapiens OX=9606 GN=CEP250 PE=1 SV=2	Centrosome-associated protein CEP250	CEP250	35.9	1228.5	-1.4	2131	2140	S2:Phosphorylation (STY):0.00	S2132	PHSHKTSPMEEQS	902.784	9754.97
Q15185	Q15185|TEBP_HUMAN	S	FSEMMNNMGGDEDVDLPEVDGADDDS(+79.97)QDS(+79.97)DDEKM(+15.99)PDLE	26	38	Prostaglandin E synthase 3 OS=Homo sapiens OX=9606 GN=PTGES3 PE=1 SV=1	Prostaglandin E synthase 3	PTGES3	79.61	4381.53	0.9	123	160	S26:Phosphorylation (STY):119.14;S29:Phosphorylation (STY):126.63;M34:Oxidation (M):106.68	S148	DGADDDSQDSDDE	665.093	7196.26
Q15185	Q15185|TEBP_HUMAN	S	FSEMMNNMGGDEDVDLPEVDGADDDS(+79.97)QDS(+79.97)DDEKM(+15.99)PDLE	29	38	Prostaglandin E synthase 3 OS=Homo sapiens OX=9606 GN=PTGES3 PE=1 SV=1	Prostaglandin E synthase 3	PTGES3	79.61	4381.53	0.9	123	160	S26:Phosphorylation (STY):119.14;S29:Phosphorylation (STY):126.63;M34:Oxidation (M):106.68	S151	DDDSQDSDDEKMP	665.093	7196.26
Q9UQ35	Q9UQ35|SRRM2_HUMAN	S	S(+79.97)RS(+79.97)GS(+79.97)S(+79.97)QELDVKPS(+79.97)ASPQER	1	20	Serine/arginine repetitive matrix protein 2 OS=Homo sapiens OX=9606 GN=SRRM2 PE=1 SV=2	Serine/arginine repetitive matrix protein 2	SRRM2	48.46	2543.88	-0.8	1537	1556	S1:Phosphorylation (STY):36.52;S3:Phosphorylation (STY):39.02;S5:Phosphorylation (STY):41.98;S6:Phosphorylation (STY):43.70;S14:Phosphorylation (STY):0.00	S1537	TPLGQRSRSGSSQ	3078.04	33336.1
Q9UQ35	Q9UQ35|SRRM2_HUMAN	S	S(+79.97)RS(+79.97)GS(+79.97)S(+79.97)QELDVKPS(+79.97)ASPQER	3	20	Serine/arginine repetitive matrix protein 2 OS=Homo sapiens OX=9606 GN=SRRM2 PE=1 SV=2	Serine/arginine repetitive matrix protein 2	SRRM2	48.46	2543.88	-0.8	1537	1556	S1:Phosphorylation (STY):36.52;S3:Phosphorylation (STY):39.02;S5:Phosphorylation (STY):41.98;S6:Phosphorylation (STY):43.70;S14:Phosphorylation (STY):0.00	S1539	LGQRSRSGSSQEL	3078.04	33336.1
Q9UQ35	Q9UQ35|SRRM2_HUMAN	S	S(+79.97)RS(+79.97)GS(+79.97)S(+79.97)QELDVKPS(+79.97)ASPQER	5	20	Serine/arginine repetitive matrix protein 2 OS=Homo sapiens OX=9606 GN=SRRM2 PE=1 SV=2	Serine/arginine repetitive matrix protein 2	SRRM2	48.46	2543.88	-0.8	1537	1556	S1:Phosphorylation (STY):36.52;S3:Phosphorylation (STY):39.02;S5:Phosphorylation (STY):41.98;S6:Phosphorylation (STY):43.70;S14:Phosphorylation (STY):0.00	S1541	QRSRSGSSQELDV	3078.04	33336.1
Q9UQ35	Q9UQ35|SRRM2_HUMAN	S	S(+79.97)RS(+79.97)GS(+79.97)S(+79.97)QELDVKPS(+79.97)ASPQER	6	20	Serine/arginine repetitive matrix protein 2 OS=Homo sapiens OX=9606 GN=SRRM2 PE=1 SV=2	Serine/arginine repetitive matrix protein 2	SRRM2	48.46	2543.88	-0.8	1537	1556	S1:Phosphorylation (STY):36.52;S3:Phosphorylation (STY):39.02;S5:Phosphorylation (STY):41.98;S6:Phosphorylation (STY):43.70;S14:Phosphorylation (STY):0.00	S1542	RSRSGSSQELDVK	3078.04	33336.1
[truncated: 2,515 more rows]

## Sheet: U118-MG +aa VS +aa Torin1
Supplementary Table 1, related to Figure 2: 4D-Labelfree quantitative phosphoproteomics analysis of proteins phosphorylated upon amino acid stimulation and inhibited by Torin1 in U118-MG cells
[truncated: 3,542 more rows]
