# Supplementary material for: Amino-Acid-mTORC1-Driven DDA1 Phosphorylation Promotes DNA Repair and Glioblastoma Progression
Source: Research Square preprint supplement (doi:10.21203/rs.3.rs-7717041/v1), 2025-10-20
Supplement: Supplementary file 2 [file dcdea829cbb2d1bf83f05086.xlsx]

## Sheet: Fig. 4b
Experiment File Path:	D:\407\CX\2024-11-27.xpt
Protocol File Path:
Plate Number	Plate 3
Date	2024-11-27
Time	12:52:26
Reader Type:	Synergy H1
Reader Serial Number:	271245
Reading Type	Reader
Procedure Details
Plate Type	96 WELL PLATE
Eject plate on completion
Set Temperature	Setpoint 37°C
	Preheat before moving to next step
Read	Absorbance Endpoint
	Full Plate
	Wavelengths: 450
	Read Speed: Normal, Delay: 100 msec, Measurements/Data Point: 8
Results
Actual Temperature:	37
		1	2	3	4	5	6	7	8	9	10	11	12
	A	3.874	3.089	2.172	1.352	0.754	0.41	0.224	0.162	0.059	0.043	0.044	0.04	450
	B	OVRFLW	2.953	1.966	1.352	0.728	0.378	0.232	0.073	0.04	0.04	0.044	0.046	450
	C	3.661	2.886	1.976	1.359	0.736	0.427	0.238	0.081	0.041	0.041	0.042	0.05	450
	D	0.043	0.045	0.041	0.042	0.042	0.043	0.042	0.045	0.041	0.041	0.04	0.041	450
	E	3.025	1.852	3.615	3.183	0.049	2.771	1.644	3.695	3.293	0.042	0.044	0.042	450
	F	3.099	1.867	3.599	3.477	0.042	2.527	1.604	3.333	3.132	0.042	0.042	0.054	450
	G	2.975	1.883	3.809	3.47	0.044	2.333	1.717	3.46	3.051	0.042	0.043	0.042	450
	H	0.046	0.042	0.041	0.042	0.046	0.041	0.041	0.059	0.041	0.045	0.042	0.044	450

## Sheet: Fig. 4e
Software Version	2.07.17
Experiment File Path:	D:\407\损失实验2024-11-19.xpt
Protocol File Path:
Plate Number	Plate 2
Date	2024-11-19
Time	14:16:01
Reader Type:	Synergy H1
Reader Serial Number:	271245
Reading Type	Reader
Procedure Details
Plate Type	96 WELL PLATE
Eject plate on completion
Read	Absorbance Endpoint
	Full Plate
	Wavelengths: 490
	Read Speed: Normal, Delay: 100 msec, Measurements/Data Point: 8
Results
Actual Temperature:	30.3
		1	2	3	4	5	6	7	8	9	10	11	12
	A	0.222	0.279	0.236	0.048	0.287	0.242	0.194	0.049	0.168	0.262	0.126	0.045	490
	B	0.346	0.37	0.227	0.043	0.443	0.472	0.432	0.048	0.561	0.509	0.309	0.048	490
	C	0.294	0.2	0.289	0.048	0.267	0.328	0.312	0.049	0.287	0.327	0.235	0.048	490
	D	0.302	0.272	0.112	0.043	0.356	0.095	0.356	0.049	0.561	0.475	0.2	0.049	490
	E	0.049	0.048	0.048	0.049	0.049	0.049	0.049	0.049	0.049	0.049	0.049	0.048	490
	F	0.05	0.049	0.05	0.049	0.049	0.048	0.049	0.049	0.05	0.049	0.049	0.049	490
	G	0.051	0.051	0.049	0.051	0.049	0.048	0.049	0.049	0.051	0.049	0.049	0.049	490
	H	0.048	0.048	0.06	0.048	0.048	0.048	0.048	0.048	0.049	0.053	0.05	0.048	490

## Sheet: Fig. 5b and c
U118	CA12 Ct1	CA12 Ct2	CA12 Ct3	actin Ct1	actin Ct2	actin Ct3	Avg目标Ct	Avg内参Ct	ΔCt	ΔΔCt	Fold Change (2^-ΔΔCt)
对照组sgCon	26.61	26.5	26.71	17.68	17.63	17.49	26.6067	17.6	9.00667	-0.0444444	1.03129		Experiment: CX20250414 Selected Filter: SYBR Green I / HRM Dye (465-510)									Experiment: cx2025415 Selected Filter: SYBR Green I / HRM Dye (465-510)
对照组sgCon	26.64	26.51	26.56	17.66	17.51	17.43	26.57	17.5333	9.03667	-0.0144444	1.01006		Include	Color	Pos	Name	Cp	Concentration	Standard	Status		Include	Color	Pos	Name	Cp	Concentration	Standard	Status
对照组sgCon	26.7	26.59	26.64	17.57	17.51	17.52	26.6433	17.5333	9.11	0.0588889	0.960003		TRUE	255	A1	Sample 1	26.61		0			TRUE	255	A1	Sample 1	28.83		0
实验组sgDDA1	25.79	25.78	25.76	17.68	17.76	17.62	25.7767	17.6867	8.09	-0.961111	1.94681		TRUE	255	A2	Sample 2	26.64		0			TRUE	255	A2	Sample 2	28.02		0
实验组sgDDA1	25.72	25.76	25.72	17.7	17.78	17.65	25.7333	17.71	8.02333	-1.02778	2.03888		TRUE	255	A3	Sample 3	26.7		0			TRUE	255	A3	Sample 3	28.88		0
实验组sgDDA1	25.85	25.84	25.69	17.72	17.71	17.58	25.7933	17.67	8.12333	-0.927778	1.90234		TRUE	255	A4	Sample 4	25.79		0			TRUE	255	A4	Sample 4	27.1		0
													TRUE	255	A5	Sample 5	25.72		0			TRUE	255	A5	Sample 5	27.04		0
													TRUE	255	A6	Sample 6	25.85		0			TRUE	255	A6	Sample 6	27.11		0
													TRUE	255	A7	Sample 7	26.33		0			TRUE	255	A7	Sample 7	27.07		0
LN229	CA12 Ct1	CA12 Ct2	CA12 Ct3	actin Ct1	actin Ct2	actin Ct3	Avg目标Ct	Avg内参Ct	ΔCt	ΔΔCt	Fold Change (2^-ΔΔCt)		TRUE	255	A8	Sample 8	26.2		0			TRUE	255	A8	Sample 8	27.34		0
对照组sgCon	26.33	26.45	26.31	17.71	17.74	17.8	26.3633	17.75	8.61333	0.00333333	0.997692		TRUE	255	A9	Sample 9	26.48		0			TRUE	255	A9	Sample 9	27.11		0
对照组sgCon	26.2	26.36	26.33	17.73	17.8	17.78	26.2967	17.77	8.52667	-0.0833333	1.05946		TRUE	255	A10	Sample 10	25.8		0			TRUE	255	A10	Sample 10	27.26		0
对照组sgCon	26.48	26.28	26.43	17.68	17.71	17.73	26.3967	17.7067	8.69	0.08	0.946058		TRUE	255	A11	Sample 11	26.04		0			TRUE	255	A11	Sample 11	27.15		0
实验组sgDDA1	25.8	25.88	26.13	18.22	18.54	18.5	25.9367	18.42	7.51667	-1.09333	2.13366		TRUE	255	A12	Sample 12	25.89		0			TRUE	255	A12	Sample 12	27.13		0
实验组sgDDA1	26.04	26.06	25.88	18.17	18.49	18.55	25.9933	18.4033	7.59	-1.02	2.02792		TRUE	255	A13	Sample 13	26.35		0			TRUE	255	A13	Sample 13	26.97		0
实验组sgDDA1	25.89	26.05	25.98	18.43	18.51	18.46	25.9733	18.4667	7.50667	-1.10333	2.14851		TRUE	255	A14	Sample 14	26.43		0			TRUE	255	A14	Sample 14	27.13		0
													TRUE	255	A15	Sample 15	26.34		0			TRUE	255	A15	Sample 15	27.16		0
													TRUE	255	A16	Sample 16	25.85		0			TRUE	255	A16	Sample 16	28.18		0
													TRUE	255	A17	Sample 17	26.03		0			TRUE	255	A17	Sample 17	27.87		0
T98G	CA12 Ct1	CA12 Ct2	CA12 Ct3	actin Ct1	actin Ct2	actin Ct3	Avg目标Ct	Avg内参Ct	ΔCt	ΔΔCt	Fold Change (2^-ΔΔCt)		TRUE	255	A18	Sample 18	26.06		0			TRUE	255	A18	Sample 18	24.73		0
对照组sgCon	26.35	26.29	26.47	17.71	17.58	17.6	26.37	17.63	8.74	-0.0666667	1.04729		TRUE	255	A19	Sample 19	17.71		0			TRUE	255	A19	Sample 19	19.51		0
对照组sgCon	26.43	26.48	26.49	17.63	17.78	17.58	26.4667	17.6633	8.80333	-0.00333333	1.00231		TRUE	255	A20	Sample 20	17.63		0			TRUE	255	A20	Sample 20	19.68		0
对照组sgCon	26.34	26.5	26.32	17.77	17.57	17.19	26.3867	17.51	8.87667	0.07	0.952638		TRUE	255	A21	Sample 21	17.77		0			TRUE	255	A21	Sample 21	19.74		0
实验组sgDDA1	25.85	25.83	25.94	17.91	17.94	17.88	25.8733	17.91	7.96333	-0.843333	1.79419		TRUE	255	A22	Sample 22	17.68		0			TRUE	255	A22	Sample 22	17.89		0
实验组sgDDA1	26.03	26.01	25.99	17.92	17.95	17.9	26.01	17.9233	8.08667	-0.72	1.64718		TRUE	255	A23	Sample 23	17.66		0			TRUE	255	A23	Sample 23	18.1		0
实验组sgDDA1	26.06	26	25.9	17.86	17.86	17.91	25.9867	17.8767	8.11	-0.696667	1.62076		TRUE	255	A24	Sample 24	17.57		0			TRUE	255	A24	Sample 24	18.04		0
													TRUE	255	B1	Sample 25	26.5		0			TRUE	255	B1	Sample 25	28.53		0
													TRUE	255	B2	Sample 26	26.51		0			TRUE	255	B2	Sample 26	28.9		0
U118	LRP1 Ct1	LRP1 Ct2	LRP1 Ct3	actin Ct1	actin Ct2	actin Ct3	Avg目标Ct	Avg内参Ct	ΔCt	ΔΔCt	Fold Change (2^-ΔΔCt)		TRUE	255	B3	Sample 27	26.59		0			TRUE	255	B3	Sample 27	28.07		0
对照组sgCon	25.07	25.12	25.09	17.68	17.63	17.49	25.0933	17.6	7.49333	-0.0488889	1.03447		TRUE	255	B4	Sample 28	25.78		0			TRUE	255	B4	Sample 28	26.85		0
对照组sgCon	25.05	25.1	25.1	17.66	17.51	17.43	25.0833	17.5333	7.55	0.00777778	0.994623		TRUE	255	B5	Sample 29	25.76		0			TRUE	255	B5	Sample 29	27.07		0
对照组sgCon	25.12	25.16	25.07	17.57	17.51	17.52	25.1167	17.5333	7.58333	0.0411111	0.971906		TRUE	255	B6	Sample 30	25.84		0			TRUE	255	B6	Sample 30	27.25		0
实验组sgDDA1	24.15	24.14	24.2	17.68	17.76	17.62	24.1633	17.6867	6.47667	-1.06556	2.09298		TRUE	255	B7	Sample 31	26.45		0			TRUE	255	B7	Sample 31	26.69		0
实验组sgDDA1	24.34	24.09	24.28	17.7	17.78	17.65	24.2367	17.71	6.52667	-1.01556	2.02168		TRUE	255	B8	Sample 32	26.36		0			TRUE	255	B8	Sample 32	26.26		0
实验组sgDDA1	24.16	24.09	24.43	17.72	17.71	17.58	24.2267	17.67	6.55667	-0.985556	1.98008		TRUE	255	B9	Sample 33	26.28		0			TRUE	255	B9	Sample 33	26.17		0
													TRUE	255	B10	Sample 34	25.88		0			TRUE	255	B10	Sample 34	27.16		0
													TRUE	255	B11	Sample 35	26.06		0			TRUE	255	B11	Sample 35	27.11		0
													TRUE	255	B12	Sample 36	26.05		0			TRUE	255	B12	Sample 36	27.1		0
LN229	LRP1 Ct1	LRP1 Ct2	LRP1 Ct3	actin Ct1	actin Ct2	actin Ct3	Avg目标Ct	Avg内参Ct	ΔCt	ΔΔCt	Fold Change (2^-ΔΔCt)		TRUE	255	B13	Sample 37	26.29		0			TRUE	255	B13	Sample 37	26.87		0
对照组sgCon	24.59	24.62	24.59	17.68	17.63	17.49	24.6	17.6	7	-0.0877778	1.06273		TRUE	255	B14	Sample 38	26.48		0			TRUE	255	B14	Sample 38	27.08		0
对照组sgCon	24.64	24.78	24.61	17.66	17.51	17.43	24.6767	17.5333	7.14333	0.0555556	0.962224		TRUE	255	B15	Sample 39	26.5		0			TRUE	255	B15	Sample 39	27.17		0
对照组sgCon	24.65	24.63	24.68	17.57	17.51	17.52	24.6533	17.5333	7.12	0.0322222	0.977913		TRUE	255	B16	Sample 40	25.83		0			TRUE	255	B16	Sample 40	27.03		0
实验组sgDDA1	24.84	24.72	24.85	17.68	17.76	17.62	24.8033	17.6867	7.11667	0.0288889	0.980175		TRUE	255	B17	Sample 41	26.01		0			TRUE	255	B17	Sample 41	27.67		0
实验组sgDDA1	24.73	24.72	24.78	17.7	17.78	17.65	24.7433	17.71	7.03333	-0.0544444	1.03846		TRUE	255	B18	Sample 42	26		0			TRUE	255	B18	Sample 42	26.51		0
实验组sgDDA1	24.73	24.73	24.64	17.72	17.71	17.58	24.7	17.67	7.03	-0.0577778	1.04086		TRUE	255	B19	Sample 43	17.58		0			TRUE	255	B19	Sample 43	19.64		0
													TRUE	255	B20	Sample 44	17.78		0			TRUE	255	B20	Sample 44	19.62		0
													TRUE	255	B21	Sample 45	17.57		0			TRUE	255	B21	Sample 45	19.43		0
													TRUE	255	B22	Sample 46	17.63		0			TRUE	255	B22	Sample 46	17.93		0
T98G	LRP1 Ct1	LRP1 Ct2	LRP1 Ct3	actin Ct1	actin Ct2	actin Ct3	Avg目标Ct	Avg内参Ct	ΔCt	ΔΔCt	Fold Change (2^-ΔΔCt)		TRUE	255	B23	Sample 47	17.51		0			TRUE	255	B23	Sample 47	17.93		0
对照组sgCon	24.82	24.74	24.76	17.68	17.63	17.49	24.7733	17.6	7.17333	-0.0266667	1.01866		TRUE	255	B24	Sample 48	17.51		0			TRUE	255	B24	Sample 48	17.83		0
对照组sgCon	24.83	24.74	24.65	17.66	17.51	17.43	24.74	17.5333	7.20667	0.00666667	0.99539		TRUE	255	C1	Sample 49	26.71		0			TRUE	255	C1	Sample 49	28.95		0
对照组sgCon	24.71	24.78	24.77	17.57	17.51	17.52	24.7533	17.5333	7.22	0.02	0.986233		TRUE	255	C2	Sample 50	26.56		0			TRUE	255	C2	Sample 50	28.88		0
实验组sgDDA1	25.02	24.82	24.83	17.68	17.76	17.62	24.89	17.6867	7.20333	0.00333333	0.997692		TRUE	255	C3	Sample 51	26.64		0			TRUE	255	C3	Sample 51	28.77		0
实验组sgDDA1	24.74	24.91	24.84	17.7	17.78	17.65	24.83	17.71	7.12	-0.08	1.05702		TRUE	255	C4	Sample 52	25.76		0			TRUE	255	C4	Sample 52	27.2		0
实验组sgDDA1	24.75	24.84	24.84	17.72	17.71	17.58	24.81	17.67	7.14	-0.06	1.04247		TRUE	255	C5	Sample 53	25.72		0			TRUE	255	C5	Sample 53	27.13		0
													TRUE	255	C6	Sample 54	25.69		0			TRUE	255	C6	Sample 54	27.05		0
													TRUE	255	C7	Sample 55	26.31		0			TRUE	255	C7	Sample 55	26.8		0
U118	NMRK1 Ct1	NMKRK1 Ct2	NMRK1 Ct3	actin Ct1	actin Ct2	actin Ct3	Avg目标Ct	Avg内参Ct	ΔCt	ΔΔCt	Fold Change (2^-ΔΔCt)		TRUE	255	C8	Sample 56	26.33		0			TRUE	255	C8	Sample 56	26.75		0
对照组sgCon	25.08	25.07	25.31	17.68	17.63	17.49	25.1533	17.6	7.55333	-0.0855556	1.0611		TRUE	255	C9	Sample 57	26.43		0			TRUE	255	C9	Sample 57	27.22		0
对照组sgCon	25	25.14	25.46	17.66	17.51	17.43	25.2	17.5333	7.66667	0.0277778	0.98093		TRUE	255	C10	Sample 58	26.13		0			TRUE	255	C10	Sample 58	27.09		0
对照组sgCon	25.1	25.16	25.43	17.57	17.51	17.52	25.23	17.5333	7.69667	0.0577778	0.960743		TRUE	255	C11	Sample 59	25.88		0			TRUE	255	C11	Sample 59	27.18		0
实验组sgDDA1	24.52	24.46	24.53	17.68	17.76	17.62	24.5033	17.6867	6.81667	-0.822222	1.76813		TRUE	255	C12	Sample 60	25.98		0			TRUE	255	C12	Sample 60	27.25		0
实验组sgDDA1	24.51	24.45	24.45	17.7	17.78	17.65	24.47	17.71	6.76	-0.878889	1.83896		TRUE	255	C13	Sample 61	26.47		0			TRUE	255	C13	Sample 61	27.18		0
实验组sgDDA1	24.55	24.34	24.45	17.72	17.71	17.58	24.4467	17.67	6.77667	-0.862222	1.81784		TRUE	255	C14	Sample 62	26.49		0			TRUE	255	C14	Sample 62	24.99		0
													TRUE	255	C15	Sample 63	26.32		0			TRUE	255	C15	Sample 63	26.44		0
													TRUE	255	C16	Sample 64	25.94		0			TRUE	255	C16	Sample 64	27.63		0
													TRUE	255	C17	Sample 65	25.99		0			TRUE	255	C17	Sample 65	24.58		0
LN229	NMRK1 Ct1	NMKRK1 Ct2	NMRK1 Ct3	actin Ct1	actin Ct2	actin Ct3	Avg目标Ct	Avg内参Ct	ΔCt	ΔΔCt	Fold Change (2^-ΔΔCt)		TRUE	255	C18	Sample 66	25.9		0			TRUE	255	C18	Sample 66	26.91		0
对照组sgCon	25.03	25.04	25.13	17.68	17.63	17.49	25.0667	17.6	7.46667	-0.00888889	1.00618		TRUE	255	C19	Sample 67	17.6		0			TRUE	255	C19	Sample 67	19.68		0
对照组sgCon	25.05	24.95	25.06	17.66	17.51	17.43	25.02	17.5333	7.48667	0.0111111	0.992328		TRUE	255	C20	Sample 68	17.58		0			TRUE	255	C20	Sample 68	19.65		0
对照组sgCon	24.96	25.06	25	17.57	17.51	17.52	25.0067	17.5333	7.47333	-0.00222222	1.00154		TRUE	255	C21	Sample 69	17.19		0			TRUE	255	C21	Sample 69	19.6		0
实验组sgDDA1	24.7	24.54	24.68	17.68	17.76	17.62	24.64	17.6867	6.95333	-0.522222	1.43617		TRUE	255	C22	Sample 70	17.49		0			TRUE	255	C22	Sample 70	17.81		0
实验组sgDDA1	24.85	24.66	24.68	17.7	17.78	17.65	24.73	17.71	7.02	-0.455556	1.37131		TRUE	255	C23	Sample 71	17.43		0			TRUE	255	C23	Sample 71	17.79		0
实验组sgDDA1	24.66	24.78	24.52	17.72	17.71	17.58	24.6533	17.67	6.98333	-0.492222	1.40661		TRUE	255	C24	Sample 72	17.52		0			TRUE	255	C24	Sample 72	17.86		0
													TRUE	255	D1	Sample 73	25.07		0			TRUE	255	D1	Sample 73	27.74		0
													TRUE	255	D2	Sample 74	25.05		0			TRUE	255	D2	Sample 74	27.75		0
													TRUE	255	D3	Sample 75	25.12		0			TRUE	255	D3	Sample 75	27.76		0
T98G	NMRK1 Ct1	NMKRK1 Ct2	NMRK1 Ct3	actin Ct1	actin Ct2	actin Ct3	Avg目标Ct	Avg内参Ct	ΔCt	ΔΔCt	Fold Change (2^-ΔΔCt)		TRUE	255	D4	Sample 76	24.15		0			TRUE	255	D4	Sample 76	25.56		0
对照组sgCon	25.26	25.42	25.12	17.68	17.63	17.49	25.2667	17.6	7.66667	-0.00333333	1.00231		TRUE	255	D5	Sample 77	24.34		0			TRUE	255	D5	Sample 77	25.6		0
对照组sgCon	25.23	25.15	25.14	17.66	17.51	17.43	25.1733	17.5333	7.64	-0.03	1.02101		TRUE	255	D6	Sample 78	24.16		0			TRUE	255	D6	Sample 78	25.49		0
对照组sgCon	25.19	25.18	25.34	17.57	17.51	17.52	25.2367	17.5333	7.70333	0.0333333	0.97716		TRUE	255	D7	Sample 79	24.59		0			TRUE	255	D7	Sample 79	25.84		0
实验组sgDDA1	24.66	24.58	24.56	17.68	17.76	17.62	24.6	17.6867	6.91333	-0.756667	1.68958		TRUE	255	D8	Sample 80	24.64		0			TRUE	255	D8	Sample 80	25.73		0
实验组sgDDA1	24.55	24.59	24.56	17.7	17.78	17.65	24.5667	17.71	6.85667	-0.813333	1.75727		TRUE	255	D9	Sample 81	24.65		0			TRUE	255	D9	Sample 81	25.91		0
实验组sgDDA1	24.58	24.58	24.52	17.72	17.71	17.58	24.56	17.67	6.89	-0.78	1.71713		TRUE	255	D10	Sample 82	24.84		0			TRUE	255	D10	Sample 82	25.75		0
													TRUE	255	D11	Sample 83	24.73		0			TRUE	255	D11	Sample 83	25.84		0
													TRUE	255	D12	Sample 84	24.73		0			TRUE	255	D12	Sample 84	25.79		0
													TRUE	255	D13	Sample 85	24.82		0			TRUE	255	D13	Sample 85	25.67		0
U118	ENO2 Ct1	ENO2 Ct2	ENO2 Ct3	actin Ct1	actin Ct2	actin Ct3	Avg目标Ct	Avg内参Ct	ΔCt	ΔΔCt	Fold Change (2^-ΔΔCt)		TRUE	255	D14	Sample 86	24.83		0			TRUE	255	D14	Sample 86	25.67		0
对照组sgCon	25.12	25.18	25.15	17.68	17.63	17.49	25.15	17.6	7.55	-0.0155556	1.01084		TRUE	255	D15	Sample 87	24.71		0			TRUE	255	D15	Sample 87	25.61		0
对照组sgCon	24.84	25.22	25.22	17.66	17.51	17.43	25.0933	17.5333	7.56	-0.00555556	1.00386		TRUE	255	D16	Sample 88	25.02		0			TRUE	255	D16	Sample 88	26.55		0
对照组sgCon	25.11	25.18	25.07	17.57	17.51	17.52	25.12	17.5333	7.58667	0.0211111	0.985473		TRUE	255	D17	Sample 89	24.74		0			TRUE	255	D17	Sample 89	26.5		0
实验组sgDDA1	24.44	24.57	24.72	17.68	17.76	17.62	24.5767	17.6867	6.89	-0.675556	1.59721		TRUE	255	D18	Sample 90	24.75		0			TRUE	255	D18	Sample 90	26.47		0
实验组sgDDA1	24.13	24.67	24.72	17.7	17.78	17.65	24.5067	17.71	6.79667	-0.768889	1.70396		TRUE	255	D19	Sample 91	17.91		0			TRUE	255	D19	Sample 91	17.8		0
实验组sgDDA1	24.54	24.58	24.74	17.72	17.71	17.58	24.62	17.67	6.95	-0.615556	1.53215		TRUE	255	D20	Sample 92	17.92		0			TRUE	255	D20	Sample 92	17.92		0
													TRUE	255	D21	Sample 93	17.86		0			TRUE	255	D21	Sample 93	17.9		0
													TRUE	255	D22	Sample 94	17.68		0			TRUE	255	D22	Sample 94	17.83		0
													TRUE	255	D23	Sample 95	17.7		0			TRUE	255	D23	Sample 95	17.82		0
LN229	ENO2 Ct1	ENO2 Ct2	ENO2 Ct3	actin Ct1	actin Ct2	actin Ct3	Avg目标Ct	Avg内参Ct	ΔCt	ΔΔCt	Fold Change (2^-ΔΔCt)		TRUE	255	D24	Sample 96	17.72		0			TRUE	255	D24	Sample 96	17.78		0
对照组sgCon	25.09	25.19	25.05	17.68	17.63	17.49	25.11	17.6	7.51	0	1		TRUE	255	E1	Sample 97	25.12		0			TRUE	255	E1	Sample 97	27.72		0
对照组sgCon	24.86	25.03	25.03	17.66	17.51	17.43	24.9733	17.5333	7.44	-0.07	1.04972		TRUE	255	E2	Sample 98	25.1		0			TRUE	255	E2	Sample 98	27.97		0
对照组sgCon	25.1	25.12	25.12	17.57	17.51	17.52	25.1133	17.5333	7.58	0.07	0.952638		TRUE	255	E3	Sample 99	25.16		0			TRUE	255	E3	Sample 99	27.72		0
实验组sgDDA1	24.93	24.88	24.93	17.68	17.76	17.62	24.9133	17.6867	7.22667	-0.283333	1.217		TRUE	255	E4	Sample 100	24.14		0			TRUE	255	E4	Sample 100	25.54		0
实验组sgDDA1	24.99	24.87	24.85	17.7	17.78	17.65	24.9033	17.71	7.19333	-0.316667	1.24545		TRUE	255	E5	Sample 101	24.09		0			TRUE	255	E5	Sample 101	25.5		0
实验组sgDDA1	24.93	24.96	24.89	17.72	17.71	17.58	24.9267	17.67	7.25667	-0.253333	1.19196		TRUE	255	E6	Sample 102	24.09		0			TRUE	255	E6	Sample 102	25.64		0
													TRUE	255	E7	Sample 103	24.62		0			TRUE	255	E7	Sample 103	25.78		0
													TRUE	255	E8	Sample 104	24.78		0			TRUE	255	E8	Sample 104	25.73		0
													TRUE	255	E9	Sample 105	24.63		0			TRUE	255	E9	Sample 105	25.65		0
T98G	ENO2 Ct1	ENO2 Ct2	ENO2 Ct3	actin Ct1	actin Ct2	actin Ct3	Avg目标Ct	Avg内参Ct	ΔCt	ΔΔCt	Fold Change (2^-ΔΔCt)		TRUE	255	E10	Sample 106	24.72		0			TRUE	255	E10	Sample 106	25.74		0
对照组sgCon	24.92	25.06	25.15	17.68	17.63	17.49	25.0433	17.6	7.44333	-0.0311111	1.0218		TRUE	255	E11	Sample 107	24.72		0			TRUE	255	E11	Sample 107	25.74		0
对照组sgCon	24.93	24.97	25.06	17.66	17.51	17.43	24.9867	17.5333	7.45333	-0.0211111	1.01474		TRUE	255	E12	Sample 108	24.73		0			TRUE	255	E12	Sample 108	25.6		0
对照组sgCon	25.06	25.06	25.06	17.57	17.51	17.52	25.06	17.5333	7.52667	0.0522222	0.96445		TRUE	255	E13	Sample 109	24.74		0			TRUE	255	E13	Sample 109	25.51		0
实验组sgDDA1	24.9	24.88	24.97	17.68	17.76	17.62	24.9167	17.6867	7.23	-0.244444	1.18464		TRUE	255	E14	Sample 110	24.74		0			TRUE	255	E14	Sample 110	25.67		0
实验组sgDDA1	25.03	24.91	24.86	17.7	17.78	17.65	24.9333	17.71	7.22333	-0.251111	1.19012		TRUE	255	E15	Sample 111	24.78		0			TRUE	255	E15	Sample 111	25.65		0
实验组sgDDA1	24.94	24.91	24.9	17.72	17.71	17.58	24.9167	17.67	7.24667	-0.227778	1.17103		TRUE	255	E16	Sample 112	24.82		0			TRUE	255	E16	Sample 112	26.63		0
													TRUE	255	E17	Sample 113	24.91		0			TRUE	255	E17	Sample 113	26.53		0
													TRUE	255	E18	Sample 114	24.84		0			TRUE	255	E18	Sample 114	26.6		0
													TRUE	255	E19	Sample 115	17.94		0			TRUE	255	E19	Sample 115	17.71		0
U118	DDA1 Ct1	DDA1 Ct2	DDA1 Ct3	actin Ct1	actin Ct2	actin Ct3	Avg目标Ct	Avg内参Ct	ΔCt	ΔΔCt	Fold Change (2^-ΔΔCt)		TRUE	255	E20	Sample 116	17.95		0			TRUE	255	E20	Sample 116	17.66		0
对照组sgCon	23.05	22.97	23.02	17.68	17.63	17.49	23.0133	17.6	5.41333	-0.0866667	1.06191		TRUE	255	E21	Sample 117	17.86		0			TRUE	255	E21	Sample 117	17.81		0
对照组sgCon	22.99	23.03	23.13	17.66	17.51	17.43	23.05	17.5333	5.51667	0.0166667	0.988514		TRUE	255	E22	Sample 118	17.76		0			TRUE	255	E22	Sample 118	17.75		0
对照组sgCon	23.07	23.12	23.12	17.57	17.51	17.52	23.1033	17.5333	5.57	0.07	0.952638		TRUE	255	E23	Sample 119	17.78		0			TRUE	255	E23	Sample 119	17.79		0
实验组sgDDA1	29.88	32.07	32.5	17.68	17.76	17.62	31.4833	17.6867	13.7967	8.29667	0.0031802		TRUE	255	E24	Sample 120	17.71		0			TRUE	255	E24	Sample 120	17.76		0
实验组sgDDA1	30.23	31.98	32.29	17.7	17.78	17.65	31.5	17.71	13.79	8.29	0.00319493		TRUE	255	F1	Sample 121	25.09		0			TRUE	255	F1	Sample 121	27.68		0
实验组sgDDA1	31.82	27.21	32.46	17.72	17.71	17.58	30.4967	17.67	12.8267	7.32667	0.00622951		TRUE	255	F2	Sample 122	25.1		0			TRUE	255	F2	Sample 122	27.85		0
													TRUE	255	F3	Sample 123	25.07		0			TRUE	255	F3	Sample 123	27.76		0
													TRUE	255	F4	Sample 124	24.2		0			TRUE	255	F4	Sample 124	25.57		0
													TRUE	255	F5	Sample 125	24.28		0			TRUE	255	F5	Sample 125	25.54		0
LN229	DDA1 Ct1	DDA1 Ct2	DDA1 Ct3	actin Ct1	actin Ct2	actin Ct3	Avg目标Ct	Avg内参Ct	ΔCt	ΔΔCt	Fold Change (2^-ΔΔCt)		TRUE	255	F6	Sample 126	24.43		0			TRUE	255	F6	Sample 126	25.62		0
对照组sgCon	22.94	22.76	22.86	17.68	17.63	17.49	22.8533	17.6	5.25333	-0.0322222	1.02259		TRUE	255	F7	Sample 127	24.59		0			TRUE	255	F7	Sample 127	25.75		0
对照组sgCon	22.79	22.81	22.91	17.66	17.51	17.43	22.8367	17.5333	5.30333	0.0177778	0.987753		TRUE	255	F8	Sample 128	24.61		0			TRUE	255	F8	Sample 128	25.72		0
对照组sgCon	22.83	22.8	22.87	17.57	17.51	17.52	22.8333	17.5333	5.3	0.0144444	0.990038		TRUE	255	F9	Sample 129	24.68		0			TRUE	255	F9	Sample 129	25.83		0
实验组sgDDA1	32.81	33.28	32.94	17.68	17.76	17.62	33.01	17.6867	15.3233	10.0378	0.000951323		TRUE	255	F10	Sample 130	24.85		0			TRUE	255	F10	Sample 130	25.81		0
实验组sgDDA1	33.61	33.9	32.52	17.7	17.78	17.65	33.3433	17.71	15.6333	10.3478	0.000767377		TRUE	255	F11	Sample 131	24.78		0			TRUE	255	F11	Sample 131	25.56		0
实验组sgDDA1	33.42	33.3	33.46	17.72	17.71	17.58	33.3933	17.67	15.7233	10.4378	0.000720968		TRUE	255	F12	Sample 132	24.64		0			TRUE	255	F12	Sample 132	25.85		0
													TRUE	255	F13	Sample 133	24.76		0			TRUE	255	F13	Sample 133	25.58		0
													TRUE	255	F14	Sample 134	24.65		0			TRUE	255	F14	Sample 134	25.47		0
													TRUE	255	F15	Sample 135	24.77		0			TRUE	255	F15	Sample 135	25.63		0
T98G	DDA1 Ct1	DDA1 Ct2	DDA1 Ct3	actin Ct1	actin Ct2	actin Ct3	Avg目标Ct	Avg内参Ct	ΔCt	ΔΔCt	Fold Change (2^-ΔΔCt)		TRUE	255	F16	Sample 136	24.83		0			TRUE	255	F16	Sample 136	26.64		0
对照组sgCon	22.94	23	22.95	17.68	17.63	17.49	22.9633	17.6	5.36333	-0.00888889	1.00618		TRUE	255	F17	Sample 137	24.84		0			TRUE	255	F17	Sample 137	26.49		0
对照组sgCon	22.99	22.96	22.9	17.66	17.51	17.43	22.95	17.5333	5.41667	0.0444444	0.969663		TRUE	255	F18	Sample 138	24.84		0			TRUE	255	F18	Sample 138	26.58		0
对照组sgCon	22.87	22.87	22.87	17.57	17.51	17.52	22.87	17.5333	5.33667	-0.0355556	1.02495		TRUE	255	F19	Sample 139	17.88		0			TRUE	255	F19	Sample 139	17.71		0
实验组sgDDA1	33.79	33.23	33.63	17.68	17.76	17.62	33.55	17.6867	15.8633	10.4911	0.000694802		TRUE	255	F20	Sample 140	17.9		0			TRUE	255	F20	Sample 140	17.78		0
实验组sgDDA1	33.31	33.48	32.83	17.7	17.78	17.65	33.2067	17.71	15.4967	10.1244	0.000895857		TRUE	255	F21	Sample 141	17.91		0			TRUE	255	F21	Sample 141	17.55		0
实验组sgDDA1	33.79	33.5	33.01	17.72	17.71	17.58	33.4333	17.67	15.7633	10.3911	0.00074467		TRUE	255	F22	Sample 142	17.62		0			TRUE	255	F22	Sample 142	17.75		0
													TRUE	255	F23	Sample 143	17.65		0			TRUE	255	F23	Sample 143	17.82		0
													TRUE	255	F24	Sample 144	17.58		0			TRUE	255	F24	Sample 144	17.72		0
													TRUE	255	G1	Sample 145	25.08		0			TRUE	255	G1	Sample 145	26.99		0
													TRUE	255	G2	Sample 146	25		0			TRUE	255	G2	Sample 146	26.94		0
													TRUE	255	G3	Sample 147	25.1		0			TRUE	255	G3	Sample 147	26.84		0
													TRUE	255	G4	Sample 148	24.52		0			TRUE	255	G4	Sample 148	26		0
													TRUE	255	G5	Sample 149	24.51		0			TRUE	255	G5	Sample 149	25.72		0
													TRUE	255	G6	Sample 150	24.55		0			TRUE	255	G6	Sample 150	25.7		0
	26	25.7	25.8										TRUE	255	G7	Sample 151	25.03		0			TRUE	255	G7	Sample 151	25.76		0
	25.72	25.72	25.89										TRUE	255	G8	Sample 152	25.05		0			TRUE	255	G8	Sample 152	25.78		0
	25.7	25.84	25.66										TRUE	255	G9	Sample 153	24.96		0			TRUE	255	G9	Sample 153	25.56		0
													TRUE	255	G10	Sample 154	24.7		0			TRUE	255	G10	Sample 154	25.83		0
													TRUE	255	G11	Sample 155	24.85		0			TRUE	255	G11	Sample 155	25.63		0
													TRUE	255	G12	Sample 156	24.66		0			TRUE	255	G12	Sample 156	25.79		0
U118	CA12 Ct1	CA12 Ct2	CA12 Ct3	actin Ct1	actin Ct2	actin Ct3	Avg目标Ct	Avg内参Ct	ΔCt	ΔΔCt	Fold Change (2^-ΔΔCt)		TRUE	255	G13	Sample 157	25.26		0			TRUE	255	G13	Sample 157	25.99		0
对照组oeCon	27.1	26.85	27.2	19.51	17.8	17.78	27.05	18.3633	8.68667	0.0266667	0.981686		TRUE	255	G14	Sample 158	25.23		0			TRUE	255	G14	Sample 158	26.06		0
对照组oeCon	27.04	27.07	27.13	19.68	17.92	17.75	27.08	18.45	8.63	-0.03	1.02101		TRUE	255	G15	Sample 159	25.19		0			TRUE	255	G15	Sample 159	26.02		0
对照组oeCon	27.11	27.25	27.05	19.74	17.9	17.78	27.1367	18.4733	8.66333	0.00333333	0.997692		TRUE	255	G16	Sample 160	24.66		0			TRUE	255	G16	Sample 160	26.01		0
实验组oeDDA1	28.83	28.53	28.95	17.89	17.83	18.22	28.77	17.98	10.79	2.13	0.228458		TRUE	255	G17	Sample 161	24.55		0			TRUE	255	G17	Sample 161	26.1		0
实验组oeDDA1	28.02	28.9	28.88	18.1	17.82	18.17	28.6	18.03	10.57	1.91	0.266093		TRUE	255	G18	Sample 162	24.58		0			TRUE	255	G18	Sample 162	26.11		0
实验组oeDDA1	28.88	28.07	28.77	18.04	17.78	18.19	28.5733	18.0033	10.57	1.91	0.266093		TRUE	65280	G19	Sample 163			0			TRUE	255	G19	Sample 163	17.78		0
													TRUE	65280	G20	Sample 164			0			TRUE	255	G20	Sample 164	17.75		0
													TRUE	65280	G21	Sample 165			0			TRUE	255	G21	Sample 165	17.78		0
													TRUE	255	G22	Sample 166	17.5		0			TRUE	255	G22	Sample 166	18.22		0
LN229	CA12 Ct1	CA12 Ct2	CA12 Ct3	actin Ct1	actin Ct2	actin Ct3	Avg目标Ct	Avg内参Ct	ΔCt	ΔΔCt	Fold Change (2^-ΔΔCt)		TRUE	255	G23	Sample 167	17.47		0			TRUE	255	G23	Sample 167	18.17		0
对照组oeCon	27.07	26.69	26.8	19.64	17.71	17.77	26.8533	18.3733	8.48	0.0211111	0.985473		TRUE	255	G24	Sample 168	17.47		0			TRUE	255	G24	Sample 168	18.19		0
对照组oeCon	27.34	26.26	26.75	19.62	17.66	17.83	26.7833	18.37	8.41333	-0.0455556	1.03208		TRUE	255	H1	Sample 169	25.07		0			TRUE	255	H1	Sample 169	26.92		0
对照组oeCon	27.11	26.17	27.22	19.43	17.81	17.81	26.8333	18.35	8.48333	0.0244444	0.983199		TRUE	255	H2	Sample 170	25.14		0			TRUE	255	H2	Sample 170	26.99		0
实验组oeDDA1	27.26	27.16	27.09	17.93	17.75	18.2	27.17	17.96	9.21	0.751111	0.594146		TRUE	255	H3	Sample 171	25.16		0			TRUE	255	H3	Sample 171	26.94		0
实验组oeDDA1	27.15	27.11	27.18	17.93	17.79	18.2	27.1467	17.9733	9.17333	0.714444	0.60944		TRUE	255	H4	Sample 172	24.46		0			TRUE	255	H4	Sample 172	25.7		0
实验组oeDDA1	27.13	27.1	27.25	17.83	17.76	18.2	27.16	17.93	9.23	0.771111	0.585966		TRUE	255	H5	Sample 173	24.45		0			TRUE	255	H5	Sample 173	25.72		0
													TRUE	255	H6	Sample 174	24.34		0			TRUE	255	H6	Sample 174	25.84		0
													TRUE	255	H7	Sample 175	25.04		0			TRUE	255	H7	Sample 175	25.76		0
													TRUE	255	H8	Sample 176	24.95		0			TRUE	255	H8	Sample 176	25.81		0
T98G	CA12 Ct1	CA12 Ct2	CA12 Ct3	actin Ct1	actin Ct2	actin Ct3	Avg目标Ct	Avg内参Ct	ΔCt	ΔΔCt	Fold Change (2^-ΔΔCt)		TRUE	255	H9	Sample 177	25.06		0			TRUE	255	H9	Sample 177	25.79		0
对照组oeCon	26.97	26.87	27.18	19.68	17.71	17.76	27.0067	18.3833	8.62333	-0.0227778	1.01591		TRUE	255	H10	Sample 178	24.54		0			TRUE	255	H10	Sample 178	25.78		0
对照组oeCon	27.13	27.08		19.65	17.78	17.79	27.105	18.4067	8.69833	0.0522222	0.96445		TRUE	255	H11	Sample 179	24.66		0			TRUE	255	H11	Sample 179	25.66		0
对照组oeCon	27.16	27.17	26.44	19.6	17.55	17.77	26.9233	18.3067	8.61667	-0.0294444	1.02062		TRUE	255	H12	Sample 180	24.78		0			TRUE	255	H12	Sample 180	25.74		0
实验组oeDDA1	28.18	27.03	27.63	17.81	17.75	18.09	27.6133	17.8833	9.73	1.08389	0.471755		TRUE	255	H13	Sample 181	25.42		0			TRUE	255	H13	Sample 181	26.03		0
实验组oeDDA1	27.87	27.67		17.79	17.82	18.05	27.77	17.8867	9.88333	1.23722	0.424189		TRUE	255	H14	Sample 182	25.15		0			TRUE	255	H14	Sample 182	26		0
实验组oeDDA1		26.51	26.91	17.86	17.72	18.16	26.71	17.9133	8.79667	0.150556	0.900903		TRUE	255	H15	Sample 183	25.18		0			TRUE	255	H15	Sample 183	26.02		0
													TRUE	255	H16	Sample 184	24.58		0			TRUE	255	H16	Sample 184	25.99		0
													TRUE	255	H17	Sample 185	24.59		0			TRUE	255	H17	Sample 185	26.09		0
U118	LRP1 Ct1	LRP1 Ct2	LRP1 Ct3	actin Ct1	actin Ct2	actin Ct3	Avg目标Ct	Avg内参Ct	ΔCt	ΔΔCt	Fold Change (2^-ΔΔCt)		TRUE	255	H18	Sample 186	24.58		0			TRUE	255	H18	Sample 186	26.07		0
对照组oeCon	27.74	27.72	27.68	19.51	17.8	17.78	27.7133	18.3633	9.35	0.00666667	0.99539		TRUE	65280	H19	Sample 187			0			TRUE	255	H19	Sample 187	17.77		0
对照组oeCon	27.75	27.97	27.85	19.68	17.92	17.75	27.8567	18.45	9.40667	0.0633333	0.95705		TRUE	65280	H20	Sample 188			0			TRUE	255	H20	Sample 188	17.83		0
对照组oeCon	27.76	27.72	27.76	19.74	17.9	17.78	27.7467	18.4733	9.27333	-0.07	1.04972		TRUE	65280	H21	Sample 189			0			TRUE	255	H21	Sample 189	17.81		0
实验组oeDDA1	25.56	25.54	25.57	17.89	17.83	18.22	25.5567	17.98	7.57667	-1.76667	3.40267		TRUE	255	H22	Sample 190	17.51		0			TRUE	255	H22	Sample 190	18.2		0
实验组oeDDA1	25.6	25.5	25.54	18.1	17.82	18.17	25.5467	18.03	7.51667	-1.82667	3.54717		TRUE	255	H23	Sample 191	17.49		0			TRUE	255	H23	Sample 191	18.2		0
实验组oeDDA1	25.49	25.64	25.62	18.04	17.78	18.19	25.5833	18.0033	7.58	-1.76333	3.39482		TRUE	255	H24	Sample 192	17.44		0			TRUE	255	H24	Sample 192	18.2		0
													TRUE	255	I1	Sample 193	25.31		0			TRUE	255	I1	Sample 193	26.93		0
													TRUE	255	I2	Sample 194	25.46		0			TRUE	255	I2	Sample 194	27		0
													TRUE	255	I3	Sample 195	25.43		0			TRUE	255	I3	Sample 195	26.89		0
LN229	LRP1 Ct1	LRP1 Ct2	LRP1 Ct3	actin Ct1	actin Ct2	actin Ct3	Avg目标Ct	Avg内参Ct	ΔCt	ΔΔCt	Fold Change (2^-ΔΔCt)		TRUE	255	I4	Sample 196	24.53		0			TRUE	255	I4	Sample 196	25.8		0
对照组oeCon	25.84	25.78	25.75	19.64	17.71	17.77	25.79	18.3733	7.41667	0.01	0.993092		TRUE	255	I5	Sample 197	24.45		0			TRUE	255	I5	Sample 197	25.89		0
对照组oeCon	25.73	25.73	25.72	19.62	17.66	17.83	25.7267	18.37	7.35667	-0.05	1.03526		TRUE	255	I6	Sample 198	24.45		0			TRUE	255	I6	Sample 198	25.66		0
对照组oeCon	25.91	25.65	25.83	19.43	17.81	17.81	25.7967	18.35	7.44667	0.04	0.972655		TRUE	255	I7	Sample 199	25.13		0			TRUE	255	I7	Sample 199	25.91		0
实验组oeDDA1	25.75	25.74	25.81	17.93	17.75	18.2	25.7667	17.96	7.80667	0.4	0.757858		TRUE	255	I8	Sample 200	25.06		0			TRUE	255	I8	Sample 200	25.71		0
实验组oeDDA1	25.84	25.74	25.56	17.93	17.79	18.2	25.7133	17.9733	7.74	0.333333	0.793701		TRUE	255	I9	Sample 201	25		0			TRUE	255	I9	Sample 201	25.79		0
实验组oeDDA1	25.79	25.6	25.85	17.83	17.76	18.2	25.7467	17.93	7.81667	0.41	0.752623		TRUE	255	I10	Sample 202	24.68		0			TRUE	255	I10	Sample 202	25.66		0
													TRUE	255	I11	Sample 203	24.68		0			TRUE	255	I11	Sample 203	25.64		0
													TRUE	255	I12	Sample 204	24.52		0			TRUE	255	I12	Sample 204	25.66		0
													TRUE	255	I13	Sample 205	25.12		0			TRUE	255	I13	Sample 205	26.05		0
T98G	LRP1 Ct1	LRP1 Ct2	LRP1 Ct3	actin Ct1	actin Ct2	actin Ct3	Avg目标Ct	Avg内参Ct	ΔCt	ΔΔCt	Fold Change (2^-ΔΔCt)		TRUE	255	I14	Sample 206	25.14		0			TRUE	255	I14	Sample 206	26.02		0
对照组oeCon	26.84	26.88	26.88	19.68	17.71	17.76	26.8667	18.3833	8.48333	-0.0366667	1.02574		TRUE	255	I15	Sample 207	25.34		0			TRUE	255	I15	Sample 207	26.11		0
对照组oeCon	26.93	26.83	26.98	19.65	17.78	17.79	26.9133	18.4067	8.50667	-0.0133333	1.00928		TRUE	255	I16	Sample 208	24.56		0			TRUE	255	I16	Sample 208	26.24		0
对照组oeCon	26.85	26.82	26.96	19.6	17.55	17.77	26.8767	18.3067	8.57	0.05	0.965936		TRUE	255	I17	Sample 209	24.56		0			TRUE	255	I17	Sample 209	26.05		0
实验组oeDDA1	26.51	26.54	26.63	17.81	17.75	18.09	26.56	17.8833	8.67667	0.156667	0.897095		TRUE	255	I18	Sample 210	24.52		0			TRUE	255	I18	Sample 210	26.08		0
实验组oeDDA1	26.53	26.57	26.56	17.79	17.82	18.05	26.5533	17.8867	8.66667	0.146667	0.903335		TRUE	65280	I19	Sample 211			0			TRUE	255	I19	Sample 211	17.76		0
实验组oeDDA1	26.43	26.55	26.46	17.86	17.72	18.16	26.48	17.9133	8.56667	0.0466667	0.968171		TRUE	65280	I20	Sample 212			0			TRUE	255	I20	Sample 212	17.79		0
													TRUE	65280	I21	Sample 213			0			TRUE	255	I21	Sample 213	17.77		0
													TRUE	255	I22	Sample 214	17.49		0			TRUE	255	I22	Sample 214	18.09		0
U118	NMRK1 Ct1	NMKRK1 Ct2	NMRK1 Ct3	actin Ct1	actin Ct2	actin Ct3	Avg目标Ct	Avg内参Ct	ΔCt	ΔΔCt	Fold Change (2^-ΔΔCt)		TRUE	255	I23	Sample 215	17.44		0			TRUE	255	I23	Sample 215	18.05		0
对照组oeCon	26	25.7	25.8	19.51	17.8	17.78	25.8333	18.3633	7.47	0.117778	0.921606		TRUE	255	I24	Sample 216	17.28		0			TRUE	255	I24	Sample 216	18.16		0
对照组oeCon	25.72	25.72	25.89	19.68	17.92	17.75	25.7767	18.45	7.32667	-0.0255556	1.01787		TRUE	255	J1	Sample 217	25.12		0			TRUE	255	J1	Sample 217	28.27		0
对照组oeCon	25.7	25.84	25.66	19.74	17.9	17.78	25.7333	18.4733	7.26	-0.0922222	1.06601		TRUE	255	J2	Sample 218	24.84		0			TRUE	255	J2	Sample 218	28.48		0
实验组oeDDA1	26.99	26.92	26.93	17.89	17.83	18.22	26.9467	17.98	8.96667	1.61444	0.326591		TRUE	255	J3	Sample 219	25.11		0			TRUE	255	J3	Sample 219	28.56		0
实验组oeDDA1	26.94	26.99	27	18.1	17.82	18.17	26.9767	18.03	8.94667	1.59444	0.33115		TRUE	255	J4	Sample 220	24.44		0			TRUE	255	J4	Sample 220	26.5		0
实验组oeDDA1	26.84	26.94	26.89	18.04	17.78	18.19	26.89	18.0033	8.88667	1.53444	0.345212		TRUE	255	J5	Sample 221	24.13		0			TRUE	255	J5	Sample 221	26.42		0
													TRUE	255	J6	Sample 222	24.54		0			TRUE	255	J6	Sample 222	26.71		0
													TRUE	255	J7	Sample 223	24.93		0			TRUE	255	J7	Sample 223	26.84		0
													TRUE	255	J8	Sample 224	24.99		0			TRUE	255	J8	Sample 224	26.93		0
LN229	NMRK1 Ct1	NMKRK1 Ct2	NMRK1 Ct3	actin Ct1	actin Ct2	actin Ct3	Avg目标Ct	Avg内参Ct	ΔCt	ΔΔCt	Fold Change (2^-ΔΔCt)		TRUE	255	J9	Sample 225	24.93		0			TRUE	255	J9	Sample 225	26.85		0
对照组oeCon	25.76	25.76	25.91	19.64	17.71	17.77	25.81	18.3733	7.43667	0.0377778	0.974154		TRUE	255	J10	Sample 226	25.09		0			TRUE	255	J10	Sample 226	26.51		0
对照组oeCon	25.78	25.81	25.71	19.62	17.66	17.83	25.7667	18.37	7.39667	-0.00222222	1.00154		TRUE	255	J11	Sample 227	24.86		0			TRUE	255	J11	Sample 227	26.53		0
对照组oeCon	25.56	25.79	25.79	19.43	17.81	17.81	25.7133	18.35	7.36333	-0.0355556	1.02495		TRUE	255	J12	Sample 228	25.1		0			TRUE	255	J12	Sample 228	26.43		0
实验组oeDDA1	25.83	25.78	25.66	17.93	17.75	18.2	25.7567	17.96	7.79667	0.397778	0.759027		TRUE	255	J13	Sample 229	24.9		0			TRUE	255	J13	Sample 229	26.76		0
实验组oeDDA1	25.63	25.66	25.64	17.93	17.79	18.2	25.6433	17.9733	7.67	0.271111	0.828681		TRUE	255	J14	Sample 230	25.03		0			TRUE	255	J14	Sample 230	26.83		0
实验组oeDDA1	25.79	25.74	25.66	17.83	17.76	18.2	25.73	17.93	7.8	0.401111	0.757275		TRUE	255	J15	Sample 231	24.94		0			TRUE	255	J15	Sample 231	26.78		0
													TRUE	255	J16	Sample 232	24.92		0			TRUE	255	J16	Sample 232	27.15		0
													TRUE	255	J17	Sample 233	24.93		0			TRUE	255	J17	Sample 233	27.03		0
													TRUE	255	J18	Sample 234	25.06		0			TRUE	255	J18	Sample 234	27.15		0
T98G	NMRK1 Ct1	NMKRK1 Ct2	NMRK1 Ct3	actin Ct1	actin Ct2	actin Ct3	Avg目标Ct	Avg内参Ct	ΔCt	ΔΔCt	Fold Change (2^-ΔΔCt)		TRUE	65280	J19	Sample 235			0			TRUE	255	J19	Sample 235	17.71		0
对照组oeCon	25.99	26.03	26.05	19.68	17.71	17.76	26.0233	18.3833	7.64	-0.0277778	1.01944		TRUE	65280	J20	Sample 236			0			TRUE	255	J20	Sample 236	17.73		0
对照组oeCon	26.06	26	26.02	19.65	17.78	17.79	26.0267	18.4067	7.62	-0.0477778	1.03367		TRUE	65280	J21	Sample 237			0			TRUE	255	J21	Sample 237	17.68		0
对照组oeCon	26.02	26.02	26.11	19.6	17.55	17.77	26.05	18.3067	7.74333	0.0755556	0.948977		TRUE	255	J22	Sample 238	17.97		0			TRUE	255	J22	Sample 238	18.22		0
实验组oeDDA1	26.01	25.99	26.24	17.81	17.75	18.09	26.08	17.8833	8.19667	0.528889	0.693088		TRUE	255	J23	Sample 239	17.92		0			TRUE	255	J23	Sample 239	18.17		0
实验组oeDDA1	26.1	26.09	26.05	17.79	17.82	18.05	26.08	17.8867	8.19333	0.525556	0.694692		TRUE	255	J24	Sample 240	17.89		0			TRUE	255	J24	Sample 240	18.43		0
实验组oeDDA1	26.11	26.07	26.08	17.86	17.72	18.16	26.0867	17.9133	8.17333	0.505556	0.704389		TRUE	255	K1	Sample 241	25.18		0			TRUE	255	K1	Sample 241	28.63		0
													TRUE	255	K2	Sample 242	25.22		0			TRUE	255	K2	Sample 242	28.46		0
													TRUE	255	K3	Sample 243	25.18		0			TRUE	255	K3	Sample 243	28.16		0
													TRUE	255	K4	Sample 244	24.57		0			TRUE	255	K4	Sample 244	26.5		0
U118	ENO2 Ct1	ENO2 Ct2	ENO2 Ct3	actin Ct1	actin Ct2	actin Ct3	Avg目标Ct	Avg内参Ct	ΔCt	ΔΔCt	Fold Change (2^-ΔΔCt)		TRUE	255	K5	Sample 245	24.67		0			TRUE	255	K5	Sample 245	26.58		0
对照组oeCon	26.5	26.5	26.17	19.51	17.8	17.78	26.39	18.3633	8.02667	-0.0411111	1.02891		TRUE	255	K6	Sample 246	24.58		0			TRUE	255	K6	Sample 246	26.61		0
对照组oeCon	26.42	26.58	26.33	19.68	17.92	17.75	26.4433	18.45	7.99333	-0.0744444	1.05296		TRUE	255	K7	Sample 247	24.88		0			TRUE	255	K7	Sample 247	26.88		0
对照组oeCon	26.71	26.61	26.65	19.74	17.9	17.78	26.6567	18.4733	8.18333	0.115556	0.923027		TRUE	255	K8	Sample 248	24.87		0			TRUE	255	K8	Sample 248	26.83		0
实验组oeDDA1	28.27	28.63	28.48	17.89	17.83	18.22	28.46	17.98	10.48	2.41222	0.187866		TRUE	255	K9	Sample 249	24.96		0			TRUE	255	K9	Sample 249	26.82		0
实验组oeDDA1	28.48	28.46	28.51	18.1	17.82	18.17	28.4833	18.03	10.4533	2.38556	0.191371		TRUE	255	K10	Sample 250	25.19		0			TRUE	255	K10	Sample 250	26.54		0
实验组oeDDA1	28.56	28.16	28.54	18.04	17.78	18.19	28.42	18.0033	10.4167	2.34889	0.196297		TRUE	255	K11	Sample 251	25.03		0			TRUE	255	K11	Sample 251	26.57		0
													TRUE	255	K12	Sample 252	25.12		0			TRUE	255	K12	Sample 252	26.55		0
													TRUE	255	K13	Sample 253	24.88		0			TRUE	255	K13	Sample 253	26.8		0
													TRUE	255	K14	Sample 254	24.91		0			TRUE	255	K14	Sample 254	26.87		0
LN229	ENO2 Ct1	ENO2 Ct2	ENO2 Ct3	actin Ct1	actin Ct2	actin Ct3	Avg目标Ct	Avg内参Ct	ΔCt	ΔΔCt	Fold Change (2^-ΔΔCt)		TRUE	255	K15	Sample 255	24.91		0			TRUE	255	K15	Sample 255	26.89		0
对照组oeCon	25.67	25.51	25.58	19.64	17.71	17.77	25.5867	18.3733	7.21333	-0.0288889	1.02023		TRUE	255	K16	Sample 256	25.06		0			TRUE	255	K16	Sample 256	27.08		0
对照组oeCon	25.67	25.67	25.47	19.62	17.66	17.83	25.6033	18.37	7.23333	-0.00888889	1.00618		TRUE	255	K17	Sample 257	24.97		0			TRUE	255	K17	Sample 257	27.07		0
对照组oeCon	25.61	25.65	25.63	19.43	17.81	17.81	25.63	18.35	7.28	0.0377778	0.974154		TRUE	255	K18	Sample 258	25.06		0			TRUE	255	K18	Sample 258	27.11		0
实验组oeDDA1	26.55	26.63	26.64	17.93	17.75	18.2	26.6067	17.96	8.64667	1.40444	0.377764		TRUE	65280	K19	Sample 259			0			TRUE	255	K19	Sample 259	17.74		0
实验组oeDDA1	26.5	26.53	26.49	17.93	17.79	18.2	26.5067	17.9733	8.53333	1.29111	0.408636		TRUE	65280	K20	Sample 260			0			TRUE	255	K20	Sample 260	17.8		0
实验组oeDDA1	26.47	26.6	26.58	17.83	17.76	18.2	26.55	17.93	8.62	1.37778	0.384811		TRUE	65280	K21	Sample 261			0			TRUE	255	K21	Sample 261	17.71		0
													TRUE	255	K22	Sample 262	17.92		0			TRUE	255	K22	Sample 262	18.54		0
													TRUE	255	K23	Sample 263	17.91		0			TRUE	255	K23	Sample 263	18.49		0
													TRUE	255	K24	Sample 264	17.92		0			TRUE	255	K24	Sample 264	18.51		0
T98G	ENO2 Ct1	ENO2 Ct2	ENO2 Ct3	actin Ct1	actin Ct2	actin Ct3	Avg目标Ct	Avg内参Ct	ΔCt	ΔΔCt	Fold Change (2^-ΔΔCt)		TRUE	255	L1	Sample 265	25.15		0			TRUE	255	L1	Sample 265	28.48		0
对照组oeCon	26.76	26.8	26.9	19.68	17.71	17.76	26.82	18.3833	8.43667	-0.0277778	1.01944		TRUE	255	L2	Sample 266	25.22		0			TRUE	255	L2	Sample 266	28.51		0
对照组oeCon	26.83	26.87	26.83	19.65	17.78	17.79	26.8433	18.4067	8.43667	-0.0277778	1.01944		TRUE	255	L3	Sample 267	25.07		0			TRUE	255	L3	Sample 267	28.54		0
对照组oeCon	26.78	26.89	26.81	19.6	17.55	17.77	26.8267	18.3067	8.52	0.0555556	0.962224		TRUE	255	L4	Sample 268	24.72		0			TRUE	255	L4	Sample 268	26.17		0
实验组oeDDA1	27.15	27.08	27.24	17.81	17.75	18.09	27.1567	17.8833	9.27333	0.808889	0.570821		TRUE	255	L5	Sample 269	24.72		0			TRUE	255	L5	Sample 269	26.33		0
实验组oeDDA1	27.03	27.07	26.98	17.79	17.82	18.05	27.0267	17.8867	9.14	0.675556	0.626091		TRUE	255	L6	Sample 270	24.74		0			TRUE	255	L6	Sample 270	26.65		0
实验组oeDDA1	27.15	27.11	26.9	17.86	17.72	18.16	27.0533	17.9133	9.14	0.675556	0.626091		TRUE	255	L7	Sample 271	24.93		0			TRUE	255	L7	Sample 271	26.88		0
													TRUE	255	L8	Sample 272	24.85		0			TRUE	255	L8	Sample 272	26.98		0
													TRUE	255	L9	Sample 273	24.89		0			TRUE	255	L9	Sample 273	26.96		0
													TRUE	255	L10	Sample 274	25.05		0			TRUE	255	L10	Sample 274	26.63		0
U118	DDA1 Ct1	DDA1 Ct2	DDA1 Ct3	actin Ct1	actin Ct2	actin Ct3	Avg目标Ct	Avg内参Ct	ΔCt	ΔΔCt	Fold Change (2^-ΔΔCt)		TRUE	255	L11	Sample 275	25.03		0			TRUE	255	L11	Sample 275	26.56		0
对照组oeCon	23.58	23.64	23.57	19.51	17.8	17.78	23.5967	18.3633	5.23333	0.178889	0.883383		TRUE	255	L12	Sample 276	25.12		0			TRUE	255	L12	Sample 276	26.46		0
对照组oeCon	23.65	23.57	23.57	19.68	17.92	17.75	23.5967	18.45	5.14667	0.0922222	0.938077		TRUE	255	L13	Sample 277	24.97		0			TRUE	255	L13	Sample 277	26.9		0
对照组oeCon	23.6	23.66	22.51	19.74	17.9	17.78	23.2567	18.4733	4.78333	-0.271111	1.20674		TRUE	255	L14	Sample 278	24.86		0			TRUE	255	L14	Sample 278	26.83		0
实验组oeDDA1	20.67	21.02	20.69	17.89	17.83	18.22	20.7933	17.98	2.81333	-2.24111	4.72761		TRUE	255	L15	Sample 279	24.9		0			TRUE	255	L15	Sample 279	26.81		0
实验组oeDDA1	20.85	20.83	20.86	18.1	17.82	18.17	20.8467	18.03	2.81667	-2.23778	4.7167		TRUE	255	L16	Sample 280	25.15		0			TRUE	255	L16	Sample 280	27.24		0
实验组oeDDA1	20.83	20.76	20.7	18.04	17.78	18.19	20.7633	18.0033	2.76	-2.29444	4.90565		TRUE	255	L17	Sample 281	25.06		0			TRUE	255	L17	Sample 281	26.98		0
													TRUE	255	L18	Sample 282	25.06		0			TRUE	255	L18	Sample 282	26.9		0
													TRUE	65280	L19	Sample 283			0			TRUE	255	L19	Sample 283	17.8		0
													TRUE	65280	L20	Sample 284			0			TRUE	255	L20	Sample 284	17.78		0
LN229	DDA1 Ct1	DDA1 Ct2	DDA1 Ct3	actin Ct1	actin Ct2	actin Ct3	Avg目标Ct	Avg内参Ct	ΔCt	ΔΔCt	Fold Change (2^-ΔΔCt)		TRUE	65280	L21	Sample 285			0			TRUE	255	L21	Sample 285	17.73		0
对照组oeCon	23.76	23.46	23.5	19.64	17.71	17.77	23.5733	18.3733	5.2	0.00444444	0.996924		TRUE	255	L22	Sample 286	17.93		0			TRUE	255	L22	Sample 286	18.5		0
对照组oeCon	23.55	23.58	23.51	19.62	17.66	17.83	23.5467	18.37	5.17667	-0.0188889	1.01318		TRUE	65280	L23	Sample 287			0			TRUE	255	L23	Sample 287	18.55		0
对照组oeCon	23.56	23.53	23.59	19.43	17.81	17.81	23.56	18.35	5.21	0.0144444	0.990038		TRUE	65280	L24	Sample 288			0			TRUE	255	L24	Sample 288	18.46		0
实验组oeDDA1	20.71	20.75	20.69	17.93	17.75	18.2	20.7167	17.96	2.75667	-2.43889	5.42224		TRUE	255	M1	Sample 289	23.05		0			TRUE	255	M1	Sample 289	25.03		0
实验组oeDDA1	20.84	20.88	20.78	17.93	17.79	18.2	20.8333	17.9733	2.86	-2.33556	5.04745		TRUE	255	M2	Sample 290	22.99		0			TRUE	255	M2	Sample 290	24.92		0
实验组oeDDA1	20.87	20.78	20.67	17.83	17.76	18.2	20.7733	17.93	2.84333	-2.35222	5.1061		TRUE	255	M3	Sample 291	23.07		0			TRUE	255	M3	Sample 291	25.07		0
													TRUE	255	M4	Sample 292	29.88		0			TRUE	255	M4	Sample 292	20.67		0
													TRUE	255	M5	Sample 293	30.23		0			TRUE	255	M5	Sample 293	20.85		0
													TRUE	255	M6	Sample 294	31.82		0			TRUE	255	M6	Sample 294	20.83		0
T98G	DDA1 Ct1	DDA1 Ct2	DDA1 Ct3	actin Ct1	actin Ct2	actin Ct3	Avg目标Ct	Avg内参Ct	ΔCt	ΔΔCt	Fold Change (2^-ΔΔCt)		TRUE	255	M7	Sample 295	22.94		0			TRUE	255	M7	Sample 295	23.76		0
对照组oeCon	25.03	25.03	25.1	19.68	17.71	17.76	25.0533	18.3833	6.67	-0.02	1.01396		TRUE	255	M8	Sample 296	22.79		0			TRUE	255	M8	Sample 296	23.55		0
对照组oeCon	24.92	25.2	24.99	19.65	17.78	17.79	25.0367	18.4067	6.63	-0.06	1.04247		TRUE	255	M9	Sample 297	22.83		0			TRUE	255	M9	Sample 297	23.56		0
对照组oeCon	25.07	25.04	25.12	19.6	17.55	17.77	25.0767	18.3067	6.77	0.08	0.946058		TRUE	255	M10	Sample 298	32.81		0			TRUE	255	M10	Sample 298	20.71		0
实验组oeDDA1	21.74	21.61	21.62	17.81	17.75	18.09	21.6567	17.8833	3.77333	-2.91667	7.55099		TRUE	255	M11	Sample 299	33.61		0			TRUE	255	M11	Sample 299	20.84		0
实验组oeDDA1	21.58	21.6	21.64	17.79	17.82	18.05	21.6067	17.8867	3.72	-2.97	7.83536		TRUE	255	M12	Sample 300	33.42		0			TRUE	255	M12	Sample 300	20.87		0
实验组oeDDA1	21.61	21.64	21.62	17.86	17.72	18.16	21.6233	17.9133	3.71	-2.98	7.88986		TRUE	255	M13	Sample 301	22.94		0			TRUE	255	M13	Sample 301	23.58		0
													TRUE	255	M14	Sample 302	22.99		0			TRUE	255	M14	Sample 302	23.65		0
													TRUE	255	M15	Sample 303	22.87		0			TRUE	255	M15	Sample 303	23.6		0
													TRUE	255	M16	Sample 304	33.79		0			TRUE	255	M16	Sample 304	21.74		0
													TRUE	255	M17	Sample 305	33.31		0			TRUE	255	M17	Sample 305	21.58		0
													TRUE	255	M18	Sample 306	33.79		0			TRUE	255	M18	Sample 306	21.61		0
													TRUE	65280	M19	Sample 307			0			TRUE	65280	M19	Sample 307			0
													TRUE	65280	M20	Sample 308			0			TRUE	65280	M20	Sample 308			0
													TRUE	65280	M21	Sample 309			0			TRUE	65280	M21	Sample 309			0
													TRUE	65280	M22	Sample 310			0			TRUE	65280	M22	Sample 310			0
													TRUE	65280	M23	Sample 311			0			TRUE	65280	M23	Sample 311			0
													TRUE	65280	M24	Sample 312			0			TRUE	65280	M24	Sample 312			0
													TRUE	255	N1	Sample 313	22.97		0			TRUE	255	N1	Sample 313	25.03		0
													TRUE	255	N2	Sample 314	23.03		0			TRUE	255	N2	Sample 314	25.2		0
													TRUE	255	N3	Sample 315	23.12		0			TRUE	255	N3	Sample 315	25.04		0
													TRUE	255	N4	Sample 316	32.07		0			TRUE	255	N4	Sample 316	21.02		0
													TRUE	255	N5	Sample 317	31.98		0			TRUE	255	N5	Sample 317	20.83		0
													TRUE	255	N6	Sample 318	27.21		0			TRUE	255	N6	Sample 318	20.76		0
													TRUE	255	N7	Sample 319	22.76		0			TRUE	255	N7	Sample 319	23.46		0
													TRUE	255	N8	Sample 320	22.81		0			TRUE	255	N8	Sample 320	23.58		0
													TRUE	255	N9	Sample 321	22.8		0			TRUE	255	N9	Sample 321	23.53		0
													TRUE	255	N10	Sample 322	33.28		0			TRUE	255	N10	Sample 322	20.75		0
													TRUE	255	N11	Sample 323	33.9		0			TRUE	255	N11	Sample 323	20.88		0
													TRUE	255	N12	Sample 324	33.3		0			TRUE	255	N12	Sample 324	20.78		0
													TRUE	255	N13	Sample 325	23		0			TRUE	255	N13	Sample 325	23.64		0
													TRUE	255	N14	Sample 326	22.96		0			TRUE	255	N14	Sample 326	23.57		0
													TRUE	255	N15	Sample 327	22.87		0			TRUE	255	N15	Sample 327	23.66		0
													TRUE	255	N16	Sample 328	33.23		0			TRUE	255	N16	Sample 328	21.61		0
													TRUE	255	N17	Sample 329	33.48		0			TRUE	255	N17	Sample 329	21.6		0
													TRUE	255	N18	Sample 330	33.5		0			TRUE	255	N18	Sample 330	21.64		0
													TRUE	65280	N19	Sample 331			0			TRUE	65280	N19	Sample 331			0
													TRUE	65280	N20	Sample 332			0			TRUE	65280	N20	Sample 332			0
													TRUE	65280	N21	Sample 333			0			TRUE	65280	N21	Sample 333			0
													TRUE	65280	N22	Sample 334			0			TRUE	65280	N22	Sample 334			0
													TRUE	65280	N23	Sample 335			0			TRUE	65280	N23	Sample 335			0
													TRUE	65280	N24	Sample 336			0			TRUE	65280	N24	Sample 336			0
													TRUE	255	O1	Sample 337	23.02		0			TRUE	255	O1	Sample 337	25.1		0
													TRUE	255	O2	Sample 338	23.13		0			TRUE	255	O2	Sample 338	24.99		0
													TRUE	255	O3	Sample 339	23.12		0			TRUE	255	O3	Sample 339	25.12		0
													TRUE	255	O4	Sample 340	32.5		0			TRUE	255	O4	Sample 340	20.69		0
													TRUE	255	O5	Sample 341	32.29		0			TRUE	255	O5	Sample 341	20.86		0
													TRUE	255	O6	Sample 342	32.46		0			TRUE	255	O6	Sample 342	20.7		0
													TRUE	255	O7	Sample 343	22.86		0			TRUE	255	O7	Sample 343	23.5		0
													TRUE	255	O8	Sample 344	22.91		0			TRUE	255	O8	Sample 344	23.51		0
													TRUE	255	O9	Sample 345	22.87		0			TRUE	255	O9	Sample 345	23.59		0
													TRUE	255	O10	Sample 346	32.94		0			TRUE	255	O10	Sample 346	20.69		0
													TRUE	255	O11	Sample 347	32.52		0			TRUE	255	O11	Sample 347	20.78		0
													TRUE	255	O12	Sample 348	33.46		0			TRUE	255	O12	Sample 348	20.67		0
													TRUE	255	O13	Sample 349	22.95		0			TRUE	255	O13	Sample 349	23.57		0
													TRUE	255	O14	Sample 350	22.9		0			TRUE	255	O14	Sample 350	23.57		0
													TRUE	255	O15	Sample 351	22.87		0			TRUE	255	O15	Sample 351	22.51		0
													TRUE	255	O16	Sample 352	33.63		0			TRUE	255	O16	Sample 352	21.62		0
													TRUE	255	O17	Sample 353	32.83		0			TRUE	255	O17	Sample 353	21.64		0
													TRUE	255	O18	Sample 354	33.01		0			TRUE	255	O18	Sample 354	21.62		0
													TRUE	65280	O19	Sample 355			0			TRUE	65280	O19	Sample 355			0
													TRUE	65280	O20	Sample 356			0			TRUE	65280	O20	Sample 356			0
													TRUE	65280	O21	Sample 357			0			TRUE	65280	O21	Sample 357			0
													TRUE	65280	O22	Sample 358			0			TRUE	65280	O22	Sample 358			0
													TRUE	65280	O23	Sample 359			0			TRUE	65280	O23	Sample 359			0
													TRUE	65280	O24	Sample 360			0			TRUE	65280	O24	Sample 360			0
													TRUE	65280	P1	Sample 361			0			TRUE	65280	P1	Sample 361			0
													TRUE	65280	P2	Sample 362			0			TRUE	65280	P2	Sample 362			0
													TRUE	65280	P3	Sample 363			0			TRUE	65280	P3	Sample 363			0
													TRUE	65280	P4	Sample 364			0			TRUE	65280	P4	Sample 364			0
													TRUE	65280	P5	Sample 365			0			TRUE	65280	P5	Sample 365			0
													TRUE	65280	P6	Sample 366			0			TRUE	65280	P6	Sample 366			0
													TRUE	65280	P7	Sample 367			0			TRUE	65280	P7	Sample 367			0
													TRUE	65280	P8	Sample 368			0			TRUE	65280	P8	Sample 368			0
													TRUE	65280	P9	Sample 369			0			TRUE	65280	P9	Sample 369			0
													TRUE	65280	P10	Sample 370			0			TRUE	65280	P10	Sample 370			0
													TRUE	65280	P11	Sample 371			0			TRUE	65280	P11	Sample 371			0
													TRUE	65280	P12	Sample 372			0			TRUE	65280	P12	Sample 372			0
													TRUE	65280	P13	Sample 373			0			TRUE	65280	P13	Sample 373			0
													TRUE	65280	P14	Sample 374			0			TRUE	65280	P14	Sample 374			0
													TRUE	65280	P15	Sample 375			0			TRUE	65280	P15	Sample 375			0
													TRUE	65280	P16	Sample 376			0			TRUE	65280	P16	Sample 376			0
													TRUE	65280	P17	Sample 377			0			TRUE	65280	P17	Sample 377			0
													TRUE	65280	P18	Sample 378			0			TRUE	65280	P18	Sample 378			0
													TRUE	65280	P19	Sample 379			0			TRUE	65280	P19	Sample 379			0
													TRUE	65280	P20	Sample 380			0			TRUE	65280	P20	Sample 380			0
													TRUE	65280	P21	Sample 381			0			TRUE	65280	P21	Sample 381			0
													TRUE	65280	P22	Sample 382			0			TRUE	65280	P22	Sample 382			0
													TRUE	65280	P23	Sample 383			0			TRUE	65280	P23	Sample 383			0
													TRUE	65280	P24	Sample 384			0			TRUE	65280	P24	Sample 384			0
													TRUE	255	J19	Sample 235	17.71		0
													TRUE	255	J20	Sample 236	17.73		0
													TRUE	255	J21	Sample 237	17.68		0
													TRUE	255	J22	Sample 238	18.22		0
													TRUE	255	J23	Sample 239	18.17		0
													TRUE	255	J24	Sample 240	18.43		0
													TRUE	255	K19	Sample 259	17.74		0
													TRUE	255	K20	Sample 260	17.8		0
													TRUE	255	K21	Sample 261	17.71		0
													TRUE	255	K22	Sample 262	18.54		0
													TRUE	255	K23	Sample 263	18.49		0
													TRUE	255	K24	Sample 264	18.51		0
													TRUE	255	L19	Sample 283	17.8		0
													TRUE	255	L20	Sample 284	17.78		0
													TRUE	255	L21	Sample 285	17.73		0
													TRUE	255	L22	Sample 286	18.5		0
													TRUE	255	L23	Sample 287	18.55		0
													TRUE	255	L24	Sample 288	18.46		0

## Sheet: Fig. 6e
实验文件路径:	D:\！new407\CX\cck8 2023.05.31.xpt
方案文件路径:	D:\DYX\abs450-elisa.prt
板编号	板 9
日期	2024-04-19
时间	15:40:44
检测仪类型:	Synergy Neo2
检测仪序列号:	2112302A
检测类型	检测仪
程序详细信息
板类型	96 WELL PLATE (使用板盖)
完成后弹出板
检测	吸收光 终点
	全板
	波长: 450
	检测速度: 正常, 延迟: 50 msec, 测量值/数据点: 8
结果
实际温度:	22.2
		1	2	3	4	5	6	7	8	9	10	11	12
	A	0.206	0.206	0.223	0.209	0.228	0.049	0.301	0.288	0.277	0.287	0.049	0.049	450
	B	0.21	0.234	0.242	0.227	0.267	0.051	0.299	0.333	0.326	0.325	0.049	0.049	450
	C	0.198	0.233	0.238	0.236	0.245	0.05	0.326	0.331	0.345	0.334	0.049	0.049	450
	D	0.053	0.05	0.05	0.053	0.05	0.05	0.05	0.05	0.049	0.051	0.049	0.049	450
	E	0.233	0.301	0.05	0.287	0.353	0.05	0.238	0.153	0.05	0.226	0.273	0.049	450
	F	0.234	0.239	0.05	0.272	0.314	0.05	0.217	0.183	0.05	0.2	0.265	0.049	450
	G	0.228	0.25	0.05	0.264	0.302	0.05	0.204	0.169	0.05	0.2	0.278	0.049	450
	H	0.049	0.049	0.049	0.049	0.049	0.049	0.049	0.049	0.049	0.05	0.049	0.049	450
软件版本	3.11.19
实验文件路径:	D:\！new407\CX\cck8 2023.05.31.xpt
方案文件路径:	D:\DYX\abs450-elisa.prt
板编号	板 10
日期	2024-04-21
时间	15:07:17
检测仪类型:	Synergy Neo2
检测仪序列号:	2112302A
检测类型	检测仪
程序详细信息
板类型	96 WELL PLATE (使用板盖)
完成后弹出板
检测	吸收光 终点
	全板
	波长: 450
	检测速度: 正常, 延迟: 50 msec, 测量值/数据点: 8
结果
实际温度:	22.1
		1	2	3	4	5	6	7	8	9	10	11	12
	A	0.259	0.26	0.309	0.251	0.234	0.049	0.67	0.533	0.419	0.459	0.049	0.049	450
	B	0.221	0.296	0.316	0.297	0.322	0.049	0.64	0.566	0.574	0.503	0.049	0.049	450
	C	0.241	0.281	0.371	0.304	0.333	0.049	0.613	0.624	0.501	0.547	0.049	0.049	450
	D	0.049	0.049	0.05	0.05	0.05	0.05	0.051	0.05	0.051	0.05	0.05	0.054	450
	E	0.224	0.342	0.05	0.383	0.528	0.049	0.443	0.289	0.051	0.404	0.643	0.051	450
	F	0.282	0.311	0.05	0.41	0.545	0.05	0.422	0.285	0.05	0.395	0.765	0.051	450
	G	0.291	0.344	0.049	0.358	0.509	0.05	0.44	0.299	0.05	0.431	0.705	0.05	450
	H	0.05	0.049	0.049	0.05	0.05	0.051	0.05	0.05	0.049	0.05	0.049	0.05	450
软件版本	3.11.19
实验文件路径:	D:\！new407\CX\cck8 2023.05.31.xpt
方案文件路径:	D:\DYX\abs450-elisa.prt
板编号	板 11
日期	2024-04-23
时间	10:53:14
检测仪类型:	Synergy Neo2
检测仪序列号:	2112302A
检测类型	检测仪
程序详细信息
板类型	96 WELL PLATE (使用板盖)
完成后弹出板
检测	吸收光 终点
	全板
	波长: 450
	检测速度: 正常, 延迟: 50 msec, 测量值/数据点: 8
结果
实际温度:	22.1
		1	2	3	4	5	6	7	8	9	10	11	12
	A	0.69	0.826	0.82	0.789	0.725	0.049	1.222	0.891	0.889	0.94	0.049	0.049	450
	B	0.838	1.336	1.357	0.901	1.348	0.049	1.392	1.046	1.012	0.963	0.05	0.05	450
	C	0.794	0.941	1.434	1.307	1.077	0.049	1.161	1.033	1.179	1.136	0.05	0.05	450
	D	0.05	0.109	0.092	0.087	0.062	0.051	0.05	0.049	0.05	0.035	0.049	0.051	450
	E	0.426	0.399	0.065	0.586	0.984	0.049	1.062	0.627	0.05	0.868	1.563	0.05	450
	F	0.448	0.409	0.049	0.604	0.85	0.049	1.01	0.537	0.05	0.971	1.527	0.049	450
	G	0.44	0.409	0.064	0.525	0.934	0.049	0.887	0.556	0.05	0.882	1.584	0.049	450
	H	0.049	0.049	0.051	0.049	0.049	0.049	0.049	0.049	0.05	0.049	0.05	0.05	450
软件版本	3.11.19
实验文件路径:	D:\！new407\CX\cck8 2023.05.31.xpt
方案文件路径:	D:\DYX\abs450-elisa.prt
板编号	板 12
日期	2024-04-25
时间	13:23:56
检测仪类型:	Synergy Neo2
检测仪序列号:	2112302A
检测类型	检测仪
程序详细信息
板类型	96 WELL PLATE (使用板盖)
完成后弹出板
检测	吸收光 终点
	全板
	波长: 450
	检测速度: 正常, 延迟: 50 msec, 测量值/数据点: 8
结果
实际温度:	22.1
		1	2	3	4	5	6	7	8	9	10	11	12
	A	1.881	1.292	1.341	1.76	1.581	0.049	1.315	0.86	0.741	0.806	0.05	0.049	450
	B	1.808	1.439	1.403	1.255	1.426	0.05	1.006	0.811	0.952	1.284	0.051	0.049	450
	C	1.289	1.781	1.031	1.378	1.593	0.05	1.953	0.82	1.157	0.588	0.052	0.049	450
	D	0.049	0.05	0.05	0.051	0.051	0.051	0.05	0.049	0.05	0.052	0.05	0.049	450
	E	1.059	0.9	0.049	1.444	2.595	0.05	0.738	0.928	0.05	0.609	0.647	0.049	450
	F	1.1	0.7	0.049	1.35	2.5	0.051	0.603	0.896	0.051	0.569	0.622	0.049	450
	G	1.152	0.683	0.049	1.226	2.518	0.051	0.754	0.926	0.05	0.725	0.575	0.049	450
	H	0.05	0.05	0.05	0.049	0.049	0.049	0.049	0.049	0.049	0.05	0.049	0.049	450

## Sheet: Fig. 7b
	Area	Mean	StdDev	Min	Max	IntDen	RawIntDen				Area	Mean	StdDev	Min	Max	IntDen	RawIntDen
1	583894	4796.21	1590.96	1444	7692	2.65659e+09	359716			1	413574	6234.21	893.955	3753	7877	2.57831e+09	349116		170320
2	645591	5949.35	1193.41	3498	9849	3.60287e+09	487847			2	457886	6693.63	1142.93	3869	9074	3.06492e+09	415005		187705
3	576050	8286.76	1380.68	4320	11424	4.77358e+09	646367			3	361877	8866.67	1136.37	5774	11045	3.20865e+09	434467		214172
4	760681	6050.15	1931.65	2302	12080	4.60224e+09	623166			4	546509	7347.6	696.812	5194	8528	4.01553e+09	543722		214172
5	1.07733e+06	6457.74	1031.54	3467	8564	7.34458e+09	994492			5	886230	5101.77	722.072	3274	7048	4.52135e+09	612213		191099
6	634214	5568.35	1838.31	385	8460	3.86563e+09	523425			6	324951	4848.55	960.508	2977	7029	1.57554e+09	213336		309263
7	819763	7332.64	2034.8	1641	10883	6.01103e+09	813923			7	502197	8433.24	1067.84	3879	10735	4.23515e+09	573460		317566
8	864075	6323.9	1945.59	1538	10273	5.46432e+09	739896			8	576050	6182.24	727.834	3606	7641	3.56128e+09	482215		288025
9	775452	10040.8	2026.42	631	13241	7.78616e+09	1054284			9	465271	5270.1	673.837	2962	6454	2.45202e+09	332016		310181
10	1.06348e+06	5058.26	2223.66	514	10252	5.37934e+09	728389			10	797607	6133.61	710.726	3669	7921	4.89221e+09	662430		265869
11	608665	6812.77	2327.38	1978	12866	3.87418e+09	524583			11	583435	5736.77	1233.71	1474	7877	3.34703e+09	453205		25229.5
12	590820	5873.56	1708.59	3007	9320	3.47022e+09	469885			12	553894	7085.79	1150.23	4453	9656	3.92478e+09	531434		36926.3
13	827148	5107.5	1660.83	1157	9200	4.22466e+09	572040			13	797607	4763.81	867.679	2423	6602	3.79965e+09	514492		29541
14	753296	7070.34	1092.62	3119	9069	5.32606e+09	721175			14	731140	6062.75	630.771	3938	7307	4.43272e+09	600212		22155.8
15	374033	5890.79	1773.75	1935	9920	2.26226e+09	306321			15	324951	4410.91	569.797	3050	5451	1.43333e+09	194080		49082
16	694214	8578.75	3161.73	1397	13120	5.95548e+09	806402			16	612976	5834.07	1188.01	2383	7823	3.57615e+09	484228		81237.8
17	701599	5456.36	1454.65	1290	8304	3.82818e+09	518354			17	612976	5587.07	635.502	3328	6838	3.42474e+09	463727		88623
18	812378	6704.88	1490.26	2462	9434	5.4469e+09	737537			18	708984	4420.33	1437.85	221	7197	3.13395e+09	424352		103394
19	841919	9018.89	2502.15	2739	13559	7.59317e+09	1028153			19	723755	7324.26	930.171	3781	8864	5.30097e+09	717777		118164
20	753296	6802.41	2384.64	1553	10834	5.12423e+09	693846			20	665132	4645.52	1049.35	1640	6233	2.95052e+09	399515		88164.1
